# Supplementary material for: Enhancing chemistry-intuitive feature learning to improve prediction performance of optical properties
Source: Royal Society of Chemistry journal article supplement (doi:10.1039/d4sc02781g), 2024-01-01
Supplement: d4sc02781g1.xlsx [file d4sc02781g1.xlsx]

## Sheet: absorption
211 absorption wavelength values as the training set and 38 ones as the
independent testing set for the transfer learning on the blue OLED emitters
Emitters	Solvents	Labels(nm)
The training set
FC(F)(C1=C(C=CC(N2C3=C(SC4=C2C=CC=C4)C=CC=C3)=C1)C5=C(C=C(C=C5)N6C7=C(SC8=C6C=CC=C8)C=CC=C7)C(F)(F)F)F	CN(C)C=O	282
CC1=CC(C)=C(B(C2=CC=C(N3C4=C(C=CC=C4)C(C)(C)C4=C3C=CC=C4)C=C2)C2=C(C)C=C(C)C=C2C)C=C1	CC1=CC=CC=C1	294
CC(C)(C1=CC2=C(N(C3=C2C=C(C=C3)C(C)(C)C)C4=CC(C(F)(F)F)=C(C=C4)C5=C(C=C(C=C5)N6C7=C(C8=C6C=CC(C(C)(C)C)=C8)C=C(C=C7)C(C)(C)C)C(F)(F)F)C=C1)C	CN(C)C=O	294
CC(C)(C1=CC2=C(N(C3=C2C=C(C=C3)C(C)(C)C)C4=CC(C(F)(F)F)=C(C=C4)C5=C(C=C(C=C5)N6C7=C(C8=C6C=CC(C(C)(C)C)=C8)C=C(C=C7)C(C)(C)C)C(F)(F)F)C=C1)C	C1CCOC1	295
CC1(C)C2=C(C=CC=C2)N(C2=CC(C(F)(F)F)=C(C3=C(C(F)(F)F)C=C(N4C5=C(C=CC=C5)C(C)(C)C5=C4C=CC=C5)C=C3)C=C2)C2=C1C=CC=C2	C1CCOC1	302
C1=CC=C(N(C2=CC=CC=C2)C2=CC=C(C3=CC(C4=NC(C5=CC=CC(C6=CC=C(N(C7=CC=CC=C7)C7=CC=CC=C7)C=C6)=C5)=NC(C5=CC=CC(C6=CC=C(N(C7=CC=CC=C7)C7=CC=CC=C7)C=C6)=C5)=N4)=CC=C3)C=C2)C=C1	CCCCCC	310
C1=CC=C(N(C2=CC=CC=C2)C2=CC=C(C3=CC(C4=NC(C5=CC=CC(C6=CC=C(N(C7=CC=CC=C7)C7=CC=CC=C7)C=C6)=C5)=NC(C5=CC=CC(C6=CC=C(N(C7=CC=CC=C7)C7=CC=CC=C7)C=C6)=C5)=N4)=CC=C3)C=C2)C=C1	CN(C)C=O	310
CC1=CC(N2C3=C(C=CC=C3)C(C3=CC=CC=C3)(C3=CC=CC=C3)C3=C2C=CC=C3)=CC(C)=C1B1C2=C(C=CC=C2)CC2=C1C=CC=C2	CC1=CC=CC=C1	316
FC(F)(C1=C(C=CC(N2C3=C(SC4=C2C=CC=C4)C=CC=C3)=C1)C5=C(C=C(C=C5)N6C7=C(SC8=C6C=CC=C8)C=CC=C7)C(F)(F)F)F	C1CCOC1	320
CC1=CC(C)=C(B(C2=CC=C(N3C4=C(C=CC=C4)OC4=C3C=CC=C4)C=C2)C2=C(C)C=C(C)C=C2C)C(C)=C1	CC1=CC=CC=C1	323
O=S(=O)(C1=CC=NC(N2C3=C(C=CC=C3)C3=C2C=CC=C3)=C1)C1=CC(N2C3=C(C=CC=C3)C3=C2C=CC=C3)=CC=C1	C1CCCCC1	327
O=S(=O)(C1=CC=C(N2C3=C(C=CC=C3)C3=C2C=CC=C3)C=C1)C1=CC=CC(N2C3=C(C=CC=C3)C3=C2C=CC=C3)=N1	C1CCCCC1	329
FC(C1=C(N2C3=C(C=CC=C3)C4=C2C=CC=C4)C(N5C6=C(C=CC=C6)C7=C5C=CC=C7)=C(N8C9=C(C=CC=C9)C%10=C8C=CC=C%10)C(N%11C%12=C(C=CC=C%12)C%13=C%11C=CC=C%13)=C1N%14C%15=C(C=CC=C%15)C%16=C%14C=CC=C%16)(F)F	C(Cl)Cl	330
N#CC1=CC(C2=CCC(N(C3=CC=CC=C3)C3=CC=CC=C3)C=C2)=CC=C1	CC1=CC=CC=C1	332
C1=CC=C(N2C3=CC=C(C4=CC(C5=NC(C6=CC=CC(C7=CC=C8C(=C7)C7=C(C=CC=C7)N8C7=CC=CC=C7)=C6)=NC(C6=CC=CC(C7=CC8=C(C=C7)N(C7=CC=CC=C7)C7=CC=CC=C78)=C6)=N5)=CC=C4)C=C3C3=C2C=CC=C3)C=C1	CO	332
FC(F)(C1=C(C(N2C3=C(C4=C2C=CC=C4)C=CC=C3)=CC(N5C6=C(C7=C5C=CC=C7)C=CC=C6)=C1N8C9=C(C%10=C8C=CC=C%10)C=CC=C9)N%11C%12=C(C%13=C%11C=CC=C%13)C=CC=C%12)F	C(Cl)Cl	332
C1=CC=C(N2C3=CC=C(C4=CC(C5=NC(C6=CC=CC(C7=CC=C8C(=C7)C7=C(C=CC=C7)N8C7=CC=CC=C7)=C6)=NC(C6=CC=CC(C7=CC8=C(C=C7)N(C7=CC=CC=C7)C7=CC=CC=C78)=C6)=N5)=CC=C4)C=C3C3=C2C=CC=C3)C=C1	C(Cl)Cl	335
O=S(=O)(C1=CC=C(N2C3=C(C=CC=C3)C3=C2C=CC=C3)C=C1)C1=NC=CC=C1	C1CCCCC1	335
O=S(=O)(C1=CC=CC=C1)C1=CC=C(N2C3=C(C=CC=C3)C3=C2C=CC=C3)C=N1	C1CCCCC1	335
O=S(=O)(C1=CC=C(N2C3=C(C=CC=C3)C3=C2C=CC=C3)C=C1)C1=CN=CC(N2C3=C(C=CC=C3)C3=C2C=CC=C3)=C1	C1CCCCC1	335
CC1=CC=C(S(=O)(=O)C2=CC(N3C4=C(C=CC=C4)C4=C3C=CC=C4)=CC(N3C4=C(C=CC=C4)C4=C3C=CC=C4)=C2)C=C1	CC1=CC=CC=C1	336
O=S(=O)(C1=CC=C(N2C3=C(C=CC=C3)C3=C2C=CC=C3)C=C1)C1=CC=C(N2C3=C(C=CC=C3)C3=C2C=CC=C3)C=N1	C1CCCCC1	336
O=S(=O)(C1=CC=C(N2C3=C(C=CC=C3)C3=C2C=CC=C3)C=C1)C1=CC=NC(N2C3=C(C=CC=C3)C3=C2C=CC=C3)=C1	C1CCCCC1	336
C1=CC2=C(C=C1)N(C1=CC(N3C4=C(C=CC=C4)C4=C3C=CC=C4)=NC=N1)C1=C2C=CC=C1	CC1=CC=CC=C1	336
COC1=CC2=C(C=C1)N(C1=CC3=C(C=C1N1C4=C(C=CC=C4)C4=C1C=CC=C4)C(=O)C1=CC=CC=C1O3)C1=C2C=CC=C1	COC1=CC2=C(C=C1)N(C1=CC3=C(C=C1N1C4=C(C=CC=C4)C4=C1C=CC=C4)C(=O)C1=CC=CC=C1O3)C1=C2C=CC=C1	337
FC(F)(F)C1=CC(C2=CC=C(N3C4=C(C=CC=C4)C4=C3C=CC=C4)C=C2)=CC(C(F)(F)F)=N1	CC1=CC=CC=C1	338
FC(F)(F)C1=CC(C2=CC=C(N3C4=C(C=CC=C4)C4=C3C=CC=C4)C=C2)=CC(C(F)(F)F)=C1	CC1=CC=CC=C1	339
FC(F)(F)C1=NC=C(C2=CC=C(N3C4=C(C=CC=C4)C4=C3C=CC=C4)C=C2)C=N1	CC1=CC=CC=C1	339
N#CC1=C(C2=CC=C(N3C4=C(C=CC=C4)C4=C3C=CC=C4)C=C2)C=CC=C1OC1=CC(C2=CC=C(N3C4=C(C=CC=C4)C4=C3C=CC=C4)C=C2)=CC=C1	CC1=CC=CC=C1	339
N#CC1=C(C2=CC(N3C4=C(C=CC=C4)C4=C3C=CC=C4)=CC=C2)C(C2=CC=CC(N3C4=C(C=CC=C4)C4=C3C=CC=C4)=C2)=CC=C1	CC1=CC=CC=C1	340
N#CC1=CC=C(C2=CC=CC(N3C4=C(C=CC=C4)C4=C3C=CC=C4)=C2)C(C2=CC(N3C4=C(C=CC=C4)C4=C3C=CC=C4)=CC=C2)=C1	CC1=CC=CC=C1	340
C1=CC=C(N2C3=C(C=CC=C3)C3=C2C=CC=C3)C(C2=CC(N3C=CC=N3)=CC(N3C=CC=N3)=C2)=C1	C(Cl)Cl	340
C1=CC2=C(C=C1)N(C1=CC(C3=CC(N4C=CC=N4)=CC(N4CCC=N4)=C3)=CC(N3C4=C(C=CC=C4)C4=C3C=CC=C4)=C1)C1=C2C=CC=C1	C(Cl)Cl	340
N#CC1=CC(C2=CCC(N(C3=CC=CC=C3)C3=CC=CC=C3)C=C2)=CC=C1	C(Cl)Cl	340
N#CC1=CC(C2=CCC(N(C3=CC=CC=C3)C3=CC=CC=C3)C=C2)=CC=C1	CO	340
C1=CC(N2C3=C(C=CC=C3)C3=C2C=CC=C3)=CC(C2=CC(N3C=CC=N3)=CC(N3C=CC=N3)=C2)=C1	C(Cl)Cl	341
CC(C)(C)C1=CC=C2C(=C1)C1=C(C=CC(C(C)(C)C)=C1)N2C1=CC=CC(S(=O)(=O)C2=CC=CC=C2)=C1	CCCCCC	341
CC(C)(C)C1=CC=C2C(=C1)C1=C(C=CC(C(C)(C)C)=C1)N2C1=CC(S(=O)(=O)C2=CC=CC(N3C4=CC=C(C(C)(C)C)C=C4C4=C3C=CC(C(C)(C)C)=C4)=C2)=CC=C1	CCCCCC	341
F[B-]1(OC2=CC=CC=C2C3=CC(C4=C(C=C(C=C4C)N5C6=C(C7=C5C=CC=C7)C=CC=C6)C)=CC=[N+]31)F	CC1=CC=CC=C1	341
CC(C1=CC2=C(N(C3=C(S2)C=C(C=C3)C(C)(C)C)C4=CC(C(F)(F)F)=CC(N5C6=C(SC7=C5C=CC(C(C)(C)C)=C7)C=C(C=C6)C(C)(C)C)=C4)C=C1)(C)C	CC1=CC=CC=C1	341
CC(C)(C)C1=CC=C2C(=C1)C1=C(C=CC(C(C)(C)C)=C1)N2C1=CC=CC(S(=O)(=O)C2=CC=CC=C2)=C1	C(Cl)Cl	342
CC(C)(C)C1=CC=C2C(=C1)C1=C(C=CC(C(C)(C)C)=C1)N2C1=CC(S(=O)(=O)C2=CC=CC(N3C4=CC=C(C(C)(C)C)C=C4C4=C3C=CC(C(C)(C)C)=C4)=C2)=CC=C1	CC1=CC=CC=C1	342
CC(C)(C)C1=CC=C2C(=C1)C1=C(C=CC(C(C)(C)C)=C1)N2C1=CC(S(=O)(=O)C2=CC=CC(N3C4=CC=C(C(C)(C)C)C=C4C4=C3C=CC(C(C)(C)C)=C4)=C2)=CC=C1	C(Cl)Cl	342
CC(C)(C)C1=CC=C2C(=C1)C1=C(C=CC(C(C)(C)C)=C1)N2C1=CC(S(=O)(=O)C2=CC=CC(N3C4=CC=C(C(C)(C)C)C=C4C4=C3C=CC(C(C)(C)C)=C4)=C2)=CC=C1	CN(C)C=O	342
CC(C)(C)C1=CC=C2C(=C1)C1=C(C=CC(C(C)(C)C)=C1)N2C1=CC=C(S(=O)(=O)C2=CC=CC=C2)C=C1	CCCCCC	343
CC(C)(C)C1=CC=C2C(=C1)C1=C(C=CC(C(C)(C)C)=C1)N2C1=CC=CC(S(=O)(=O)C2=CC=CC=C2)=C1	CN(C)C=O	343
CC(C)(C)C1=CC=C2C(=C1)C1=C(C=CC(C(C)(C)C)=C1)N2C1=CC(S(=O)(=O)C2=CC=CC(N3C4=CC=C(C(C)(C)C)C=C4C4=C3C=CC(C(C)(C)C)=C4)=C2)=CC=C1	CO	343
CC(C)(C)C1=CC=C2C(=C1)C1=C(C=CC(C(C)(C)C)=C1)N2C1=CC=C(S(=O)(=O)C2=CC(N3C4=CC=C(C(C)(C)C)C=C4C4=C3C=CC(C(C)(C)C)=C4)=CC=C2)C=C1	CCCCCC	343
CC(C)(C)C1=CC=C2C(=C1)C1=C(C=CC(C(C)(C)C)=C1)N2C1=CC=C(S(=O)(=O)C2=CC=CC=C2)C=C1	CC1=CC=CC=C1	344
CC(C)(C)C1=CC=C2C(=C1)C1=C(C=CC(C(C)(C)C)=C1)N2C1=CC=C(S(=O)(=O)C2=CC=CC=C2)C=C1	C(Cl)Cl	344
CC(C)(C)C1=CC=C2C(=C1)C1=C(C=CC(C(C)(C)C)=C1)N2C1=CC=C(S(=O)(=O)C2=CC=C(N3C4=CC=C(C(C)(C)C)C=C4C4=C3C=CC(C(C)(C)C)=C4)C=C2)C=C1	CCCCCC	344
CC(C)(C)C1=CC=C2C(=C1)C1=C(C=CC(C(C)(C)C)=C1)N2C1=CC=C(S(=O)(=O)C2=CC(N3C4=CC=C(C(C)(C)C)C=C4C4=C3C=CC(C(C)(C)C)=C4)=CC=C2)C=C1	C(Cl)Cl	344
C1=CC2=C(C=C1)N(C1=CC3=C(C=C1)N(C1=CC4=C5C(=C1)C1=C(C=CC=C1)N5C1=C4C=CC=C1)C1=C3C=CC=C1)C1=C2C=CC=C1	CC1=CC=CC=C1	344
F[B-]1(OC2=CC=CC=C2C3=CC(C4=C(C=C(C=C4C)N5C6=C(C7=C5C=CC(C8=CC=CC=C8)=C7)C=C(C=C6)C9=CC=CC=C9)C)=CC=[N+]31)F	CC1=CC=CC=C1	344
CC(C)(C)C1=CC=C2C(=C1)C1=C(C=CC(C(C)(C)C)=C1)N2C1=CC=C(S(=O)(=O)C2=CC=CC=C2)C=C1	CO	345
CC(C)(C)C1=CC=C2C(=C1)C1=C(C=CC(C(C)(C)C)=C1)N2C1=CC=C(S(=O)(=O)C2=CC=C(N3C4=CC=C(C(C)(C)C)C=C4C4=C3C=CC(C(C)(C)C)=C4)C=C2)C=C1	CC1=CC=CC=C1	345
CC(C)(C)C1=CC=C2C(=C1)C1=C(C=CC(C(C)(C)C)=C1)N2C1=CC=C(S(=O)(=O)C2=CC=C(N3C4=CC=C(C(C)(C)C)C=C4C4=C3C=CC(C(C)(C)C)=C4)C=C2)C=C1	C(Cl)Cl	345
CC(C)(C)C1=CC=C2C(=C1)C1=C(C=CC(C(C)(C)C)=C1)N2C1=CC=C(S(=O)(=O)C2=CC=C(N3C4=CC=C(C(C)(C)C)C=C4C4=C3C=CC(C(C)(C)C)=C4)C=C2)C=C1	CN(C)C=O	345
CC(C)(C)C1=CC=C2C(=C1)C1=C(C=CC(C(C)(C)C)=C1)N2C1=CC=C(S(=O)(=O)C2=CC(N3C4=CC=C(C(C)(C)C)C=C4C4=C3C=CC(C(C)(C)C)=C4)=CC=C2)C=C1	CO	345
O=C(C1=CC=C(C=C1)N2C3=C(C4=C2C=CC(N5C6=CC=CC=C6C7=C5C=CC=C7)=C4)C=CC=C3)C8=CC=C(C=C8)N9C%10=C(C%11=C9C=CC=C%11)C=C(N%12C%13=CC=CC=C%13C%14=C%12C=CC=C%14)C=C%10	CC1=CC=CC=C1	345
CC1=CC(N2C3=C(C=CC=C3)C(C)(C)C3=C2C=CC=C3)=CC(C)=C1B1C2=C(C=CC=C2)OC2=C1C=CC=C2	CC1=CC=CC=C1	346
CC(C)(C)C1=CC=C2C(=C1)C1=C(C=CC(C(C)(C)C)=C1)N2C1=CC=C(S(=O)(=O)C2=CC=C(N3C4=CC=C(C(C)(C)C)C=C4C4=C3C=CC(C(C)(C)C)=C4)C=C2)C=C1	CO	346
N#CC1=CC(C2=CC3=C(C=C2)N(C2=CC=CC=C2)C2=CC=CC=C23)=CC=C1	CO	347
C1=CC=C(N2C3=CC=C(C4=CC(N5C=CC=N5)=CC(N5C=CC=N5)=C4)C=C3C3=C2C=CC=C3)C=C1	C(Cl)Cl	348
N#CC1=CC(C2=CC3=C(C=C2)N(C2=CC=CC=C2)C2=CC=CC=C23)=CC=C1	CN(C)C=O	348
CC(C)(C)C1=CC2=C(C=C1)N(C1=CC=C(S(=O)(=O)C3=CC=CC(S(=O)(=O)C4=CC=C(N5C6=C(C=C(C(C)(C)C)C=C6)C6=C5C=CC(C(C)(C)C)=C6)C=C4)=C3)C=C1)C1=C2C=C(C(C)(C)C)C=C1	CC1=CC=CC=C1	348
FC(F)(F)C1=NC(C(F)(F)F)=C(C2=CC=C(N3C4=C(C=CC=C4)C4=C3C=CC=C4)C=C2)C=C1	CC1=CC=CC=C1	348
O=C(C1=CC=CC=C1)C1=CC=C(N(C2=CC=CC=C2)C2=CC=C3C=CC=CC3=C2C2=C3C=CC=CC3=CC=C2N(C2=CC=CC=C2)C2=CC=C(C(=O)C3=CC=CC=C3)C=C2)C=C1	C1CCOC1	349
CC(C)C1=CC(C(C)C)=C(B2C3=CC=CC=C3OC3=C2C=CC(N2C4=CC=CC=C4C4=C2C2=C(C=C4)N(C4=CC=CC=C4)C4=C2C=CC=C4)=C3)C(C(C)C)=C1	CC1=CC=CC=C1	350
C1=CC=C(C2=NC(C3=CC=CC=C3)=NC(C3=CC=C(N4C5=C(C=CC=C5)C5=C4C=CC(C4=CC6=C(C=C4)C4=C(C=CC=C4)N6C4=CC=C(C6=NC(C7=CC=CC=C7)=NC(C7=CC=CC=C7)=N6)C=C4)=C5)C=C3)=N2)C=C1	C1CCOC1	350
CC1=CC(C)=C(N(C2=CC=CC=C2)C2=CC=C(S(=O)(=O)C3=CC=C(S(=O)(=O)C4=CCC(N(C5=CC=CC=C5)C5=C(C)C=C(C)C=C5C)C=C4)C=C3)C=C2)C(C)=C1	CC1=CC=CC=C1	351
CC(C)(C)C1=CC=C(N(C2=CC=C(S(=O)(=O)C3=CC=C(S(=O)(=O)C4=CC=C(N(C5=CC=C(C(C)(C)C)C=C5)C5=C(C(C)(C)C)C=CC=C5)C=C4)C=C3)C=C2)C2=CC=CC=C2C(C)(C)C)C=C1	CC1=CC=CC=C1	351
C1=CC=C(C2=CC=C3C(=C2)C2=C(C=CC=C2)N3C2=CC=C(C3=NC(C4=CC=CC=C4)=NC(C4=CC=CC=C4)=C3)C=C2)C=C1	CC1=CC=CC=C1	352
CC1=CC=CC=C1C1=NC(C2=CC=CC=C2C)=NC(C2=C(C)C=C(N3C4=C(C=CC=C4)C(C)(C)C4=C3C=CC=C4)C=C2C)=N1	CC1=CC=CC=C1	353
CC1=CC=CC(C)=C1C1=NC(C2=C(C)C=CC=C2C)=NC(C2=C(C)C=C(N3C4=C(C=CC=C4)C(C)(C)C4=C3C=CC=C4)C=C2C)=N1	CC1=CC=CC=C1	353
CC(C)(C)C1=CC2=C(C=C1)N(C1=CC=CC=C1C1=NC(C3=CC=CC=C3)=NC(C3=CC=CC=C3)=N1)C1=C2C=C(C(C)(C)C)C=C1	CC(C)(C)C1=CC2=C(C=C1)N(C1=CC=CC=C1C1=NC(C3=CC=CC=C3)=NC(C3=CC=CC=C3)=N1)C1=C2C=C(C(C)(C)C)C=C1	354
CC1(C)C2=C(C=CC=C2)N(C2=CC3=C(C=C2)C2=C(C=C(N4C5=C(C=CC=C5)C(C)(C)C5=C4C=CC=C5)C=C2)C2=C3N=CC=N2)C2=C1C=CC=C2	CC1=CC=CC=C1	355
N#CC1=C(N2C3=C(C=CC=C3)C3=C2C=CC=C3)C=CC=C1N1C2=C(C=CC=C2)C2=C1C=CC=C2	CC1=CC=CC=C1	355
CCCCC1=CC2=C(C=C1)N(C1=CC=C(S(=O)(=O)C3=CC=C(S(=O)(=O)C4=CC=C(N5C6=C(C=C(CCCC)C=C6)C6=C5C=CC(CCCC)=C6)C=C4)C=C3)C=C1)C1=C2C=C(CCCC)C=C1	CC1=CC=CC=C1	355
CC1(C2=C(N(C3=C1C=CC=C3)C4=CC5=C(S(=O)(C6=CC=CC=C6O5)=O)C=C4)C=CC=C2)C	CC1=CC=CC=C1	356
CC(C)(C)C1=CC2=C(C=C1)N(C1=CC=C(S(=O)(=O)C3=CC=C(N4C5=C(C=C(C(C)(C)C)C=C5)C5=C4C=CC(C(C)(C)C)=C5)C=N3)N=C1)C1=C2C=C(C(C)(C)C)C=C1	C1=CC=C(C=C1)P(=O)(C2=CC=CC=C2)C3=CC4=C(C=C3)SC5=C4C=C(C=C5)P(=O)(C6=CC=CC=C6)C7=CC=CC=C7	356
N#CC1=C(C=C(C(N2C3=CC=C(P(C4=CC=CC=C4)(C5=CC=CC=C5)=O)C=C3C6=C2C=CC=C6)=C1)N7C8=C(C9=C7C=CC=C9)C=C(P(C%10=CC=CC=C%10)(C%11=CC=CC=C%11)=O)C=C8)C#N	C(Cl)Cl	356
CC1=CC(C2=CC=[N+]3C(C4=CC=CC=C4O[B-]3(F)F)=C2)=CC=C1N5C6=C(C=C(C7=CC=CC=C7)C=C6)C8=C5C=CC(C9=CC=CC=C9)=C8	CC1=CC=CC=C1	357
CC(C1=CC2=C(N(C3=C(C2(C)C)C=C(C=C3)C(C)(C)C)C4=CC(C(F)(F)F)=CC(N5C6=C(C(C)(C7=C5C=CC(C(C)(C)C)=C7)C)C=C(C=C6)C(C)(C)C)=C4)C=C1)(C)C	CC1=CC=CC=C1	358
CC1=CC(C2=NC(C3=CC=CC=C3)=NC(C3=CC=CC=C3)=N2)=CC=C1N1C2=C(C=CC=C2)C2=C1C=CC=C2	CC1=CC=CC=C1	360
CC1=C(C2=NC(C3=CC=CC=C3)=NC(C4=CC=CC=C4)=N2)C=CC(N5C6=C(C7=C5C=CC=C7)C=CC=C6)=C1	CC1=CC=CC=C1	360
CC1=CC(C2=NC(C3=CC=CC=C3)=NC(C4=CC=CC=C4)=N2)=CC(C)=C1N5C6=C(C7=C5C=CC=C7)C=CC=C6	CC1=CC=CC=C1	360
C1=CC=C(NC2=CC=C3C=CC=CC3=C2C2=C(NC3=CC=CC=C3)C=CC3=CC=CC=C32)C=C1	C1CCOC1	360
CC1=CC=CC2=C1N(C3=C2C=CC=C3)C(C=C4)=CC=C4C5=NC(C6=CC=CC=C6)=NC(C7=CC=CC=C7)=N5	CC1=CC=CC=C1	361
C1=CC=C(N(C2=CC=CC=C2)C2=CC3=C(C=C2)N(C2=CC(N4C5=C(C=C(N(C6=CC=CC=C6)C6=CC=CC=C6)C=C5)C5=C4C=CC(N(C4=CC=CC=C4)C4=CC=CC=C4)=C5)=NC=N2)C2=C3C=C(N(C3=CC=CC=C3)C3=CC=CC=C3)C=C2)C=C1	CC1=CC=CC=C1	361
O=C(C1=CC=CC=C1O2)C(C=C3N4C5=C(C6=C4C=CC(C(C)(C)C)=C6)C=C(C(C)(C)C)C=C5)=C2C=C3N(C7=C8C=C(OC)C=C7)C9=C8C=CC=C9	CC1=CC=CC=C1	361
O=S(C(C=C1)=CC=C1N2C(C=CC=C3)=C3C(C=C4)=C2C5=C4C(C=CC=C6)=C6N5C7=CC=CC=C7)(C8=CC=CC=C8)=O	CC1=CC=CC=C1	362
C1=CC=C(C2=CC3=C(C=C2)N(C2=CC4=C(C=C2)N(C2=CC=C(C5=NC(C6=CC=CC=C6)=NC(C6=CC=CC=C6)=N5)C=C2)C2=C4C=C(N4C5=C(C=C(C6=CC=CC=C6)C=C5)C5=C4C=CC(C4=CC=CC=C4)=C5)C=C2)C2=C3C=C(C3=CC=CC=C3)C=C2)C=C1	CC1=CC=CC=C1	363
CC(C)(C)C1=CC2=C(C=C1)N(C1=CC=C(S(=O)(=O)C3=CC=C(S(=O)(=O)C4=CC=C(N5C6=C(C=C(C(C)(C)C)C=C6)C6=C5C=CC(C(C)(C)C)=C6)C=C4)C=C3)C=C1)C1=C2C=C(C(C)(C)C)C=C1	CC1=CC=CC=C1	363
C1=CC=C(C2=CC(C3=CC=C(N4C5=CC6=C(C=C5C5=C4C=CC=C5)C4=C(C=CC=C4)C64C5=C(C=CC=C5)C5=C4C=CC=C5)C=C3)=NC(C3=CC=CC=C3)=N2)C=C1	CC1=CC=CC=C1	363
C1=CC=C(C2=NC(C3=CC=CC=C3)=NC(C3=CC=C(N4C5=CC=CC=C5C5=CC6=C(C=C54)C4(C5=CC=CC=C5C5=CC=CC=C54)C4=CC=CC=C46)C=C3)=N2)C=C1	CC1=CC=CC=C1	364
COC1=CC(C2=NC(C3=CC=CC(OC)=C3)=NC(C3=CC=CC=C3N3C4=C(C=C(C(C)(C)C)C=C4)C4=C3C=CC(C(C)(C)C)=C4)=N2)=CC=C1	COC1=CC(C2=NC(C3=CC=CC(OC)=C3)=NC(C3=CC=CC=C3N3C4=C(C=C(C(C)(C)C)C=C4)C4=C3C=CC(C(C)(C)C)=C4)=N2)=CC=C1	364
CC1(C)C2=C(C=CC=C2)N(C2=CC3=C(C=C2)C2=C(C=C(N4C5=C(C=CC=C5)C(C)(C)C5=C4C=CC=C5)C=C2)C32C3=CC=CC=C3S(=O)(=O)C3=C2C=CC=C3)C2=C1C=CC=C2	CC1=CC=CC=C1	364
CC1(C)C2=CC=CC=C2N(C2=CC=C3C(=C2)C(C2=CC=CC=C2)(C2=CC=CC=C2)C2=C(C=CC(N4C5=CC=CC=C5C(C)(C)C5=C4C=CC=C5)=C2)S3(=O)=O)C2=C1C=CC=C2	CC1=CC=CC=C1	364
CCCCN1C(C2=CC=C(C3=CC=CC(C1=O)=C23)OC4=CC=CC=C4)=O	CC1=CC=CC=C1	365
O=C(C(C=C1)=CC=C1N2C(C=CC=C3)=C3C(C=C4)=C2C5=C4C(C=CC=C6)=C6N5C7=CC=CC=C7)C8=CC=CC=C8	CC1=CC=CC=C1	365
C1(C2=NC(C3=CC=CC=C3)=NC(C4=CC=C(C=C4)N5C6=C(C7=C5C=CC=C7)C=CC=C6)=N2)=CC=CC=C1	CC1=CC=CC=C1	365
C1=CC=C(C2=NC(C3=CC=CC=C3)=NC(C3=CC=C(N4C5=CC=CC=C5C5=CC6=C(C=C54)C(C4=CC=CC=C4)(C4=CC=CC=C4)C4=CC=CC=C46)C=C3)=N2)C=C1	CC1=CC=CC=C1	366
CC1=CC=CC2=C1N(C3=C2C=CC=C3)C(C=C4)=CC=C4C5=NC(C6=CC=CC=C6)=CC(C7=CC=CC=C7)=N5	CC1=CC=CC=C1	366
C1=CC=C(C2=NC(C3=CC=CC=C3)=NC(C3=CC=C(N4C5=C(C=CC=C5)C5=C4C=CC(N4C6=C(C=CC=C6)C6=C4C=CC=C6)=C5)C=C3)=N2)C=C1	CC1=CC=CC=C1	367
CC(C1=CC2=C(N(C3=C2C=C(C=C3)C(C)(C)C)C4=C(C(N5C6=C(C7=C5C=CC(C(C)(C)C)=C7)C=C(C=C6)C(C)(C)C)=CC=C4)C8=NC(C9=CC=CC=C9)=NC(C%10=CC=CC=C%10)=N8)C=C1)(C)C	CC(C1=CC2=C(N(C3=C2C=C(C=C3)C(C)(C)C)C4=C(C(N5C6=C(C7=C5C=CC(C(C)(C)C)=C7)C=C(C=C6)C(C)(C)C)=CC=C4)C8=NC(C9=CC=CC=C9)=NC(C%10=CC=CC=C%10)=N8)C=C1)(C)C	367
CC(C)(C)C1=CC2=C(C=C1)N(C1=C(C#N)C(N3C4=C(C=C(C(C)(C)C)C=C4)C4=C3CCC(C(C)(C)C)=C4)=CC=C1)C1=C2C=C(C(C)(C)C)C=C1	CC1=CC=CC=C1	367
CC(C)(C)C1=CC2=C(C=C1)N(C1=CC=C(S(=O)(=O)C3=CC=C(N4C5=C(C=C(C(C)(C)C)C=C5)C5=C4C=CC(C(C)(C)C)=C5)N=C3)C=N1)C1=C2C=C(C(C)(C)C)C=C1	C1=CC=C(C=C1)P(=O)(C2=CC=CC=C2)C3=CC4=C(C=C3)SC5=C4C=C(C=C5)P(=O)(C6=CC=CC=C6)C7=CC=CC=C7	367
CC1(C)C2=C(C=CC=C2)N(C2=CC3=C(C=C2)N2C4=C(C=CC=C4)C4=CC(N5C6=C(C=CC=C6)C(C)(C)C6=C5C=CC=C6)=CC3=C42)C2=C1C=CC=C2	CC1=CC=CC=C1	367
CC1=CC2=C(C=C1)N(C1=C(C#N)C(N3C4=C(C=C(C)C=C4)C4=C3CCC(C)=C4)=CC=C1)C1=C2C=C(C)C=C1	CC1=CC=CC=C1	368
CC1(C)C2=C(C=CC=C2)N(C2=CC3=C4C(=C2)C2=C(C=CC=C2)N4C2=C3C=CC=C2)C2=C1C=CC=C2	CC1=CC=CC=C1	368
O=C(C1=CC=C(N(C2=CC=CC=C2)C2=CC=CC3=C2C=CC=C3)C=C1)C1=CC=C(N(C2=CC=CC=C2)C2=CC=CC3=C2C=CC=C3)C=C1	C1CCOC1	368
C1=CC2=C(C=C1)N(C1=CC(C3=CC(N4C5=C(C=CC=C5)C5=C4C=CC=C5)=NC(N4C5=C(C=CC=C5)C5=C4C=CC=C5)=C3)=CC(N3C4=C(C=CC=C4)C4=C3C=CC=C4)=N1)C1=C2C=CC=C1	CC1=CC=CC=C1	369
C1=CC=C(N(C2=CC=CC=C2)C2=CC3=C(C=C2)N(C2=CC4=C(C=C2)C2=C(N=CC=N2)C2=C4C=C(N4C5=C(C=CC=C5)C5=C4C=CC(N(C4=CC=CC=C4)C4=CC=CC=C4)=C5)C=C2)C2=C3C=CC=C2)C=C1	CC1=CC=CC=C1	370
CC(C)(C)C1=CC2=C(C=C1)N(C3=C2C=C(C(C)(C)C)C=C3)C4=CC(C(F)(F)F)=C(C5=NC(C6=CC=CC=C6)=NC(C7=CC=CC=C7)=N5)C=C4	CC1=CC=CC=C1	370
C1=CC=C(C2=NN=C(C3=CC(C4=NN=C(C5=CC=CC=C5)O4)=C(N4C5=CC=CC=C5C5=C4C=CC=C5)C=C3N3C4=CC=CC=C4C4=C3C=CC=C4)O2)C=C1	CC1=CC=CC=C1	370
CC1=CC=C2B3C4=C(C=C(C)C=C4)OC4=CC(N5C6=C(C=CC=C6)C6=C5C5=C(C7=C6N(C6=CC=CC=C6)C6=C7C=CC=C6)N(C6=CC=CC=C6)C6=C5C=CC=C6)=CC(=C34)OC2=C1	CC1=CC=CC=C1	371
CC(C)(C1=CC2=C(OC3=CC(N4C5=C(C6=C4C=CC(C(C)(C)C)=C6)C=C(C=C5)C(C)(C)C)=CC7=C3B2C8=C(O7)C=CC(C(C)(C)C)=C8)C=C1)C	CC(C)(C1=CC2=C(OC3=CC(N4C5=C(C6=C4C=CC(C(C)(C)C)=C6)C=C(C=C5)C(C)(C)C)=CC7=C3B2C8=C(O7)C=CC(C(C)(C)C)=C8)C=C1)C	371
CC(C)(C1=CC2=C(OC3=CC(N4C5=C(C6=C4C=CC(C(C)(C)C)=C6)C=C(C=C5)C(C)(C)C)=CC7=C3B2C8=C(O7)C=CC(C(C)(C)C)=C8)C=C1)C	CC(C)(C1=CC2=C(OC3=CC(N4C5=C(C6=C4C=CC(C(C)(C)C)=C6)C=C(C=C5)C(C)(C)C)=CC7=C3B2C8=C(O7)C=CC(C(C)(C)C)=C8)C=C1)C	371
C1(C2=NN=C(N2C3=CC=CC=C3)C4=CC=C(N(C5=C(O6)C=CC=C5)C7=C6C=CC=C7)C=C4)=CC=CC=C1	CC1=CC=CC=C1	372
C1=CC=C(C2=NC(C3=CC=CC=C3)=NC(C3=CC=C(N4C5=CC=CC=C5C5=C6C(=CC=C54)C4=CC=CC=C4C6(C4=CC=CC=C4)C4=CC=CC=C4)C=C3)=N2)C=C1	CC1=CC=CC=C1	372
FC(C1=C(N2C3=C(C4=C2C=CC=C4)C=CC=C3)C=CC(C5=NC(C6=CC=CC=C6)=NC(C7=CC=CC=C7)=N5)=C1)(F)F	CC1=CC=CC=C1	372
FC(C1=C(C2=NC(C3=CC=CC=C3)=NC(C4=CC=CC=C4)=N2)C=CC(N5C6=C(C7=C5C=CC=C7)C=CC=C6)=C1)(F)F	CC1=CC=CC=C1	372
N#CC1=CC(C#N)=C(N2C3=C(C=CC=C3)C3=C2C=CC=C3)C=C1N1C2=C(C=CC=C2)C2=C1C=CC=C2	CC1=CC=CC=C1	373
CC1=CC(C)=C(B(C2=C(C)C=C(C)C=C2C)C2=C(C)C=C(N3C4=C(C=CC=C4)C(C4=CC=CC=C4)(C4=CC=CC=C4)C4=C3C=CC=C4)C=C2C)C(C)=C1	CC1=CC=CC=C1	373
N#CC1=CC(C#N)=C(N2C3=CC=CC=C3C3=C2C=CC=C3)C=C1N1C2=CC=CC=C2C2=C1C=CC=C2	CC1=CC=CC=C1	374
CC1=CC(C)=C(B(C2=C(C)C=C(C)C=C2C)C2=C(C)C=C(N3C4=C(C=CC=C4)C4=C3C=CC(N(C3=CC=CC=C3)C3=CC=CC=C3)=C4)C=C2C)C(C)=C1	CC1=CC=CC=C1	375
CC1=CC=C(S(=O)(=O)C2=CC(N3C4=C(C=CC=C4)C4=C3C=CC=C4)=NC(N3C4=C(C=CC=C4)C4=C3C=CC=C4)=C2)C=C1	CC1=CC=CC=C1	375
N#CC1=CC(C#N)=C(N2C3=C(C=CC=C3)C3=C2C=CC=C3)C=C1N1C2=C(C=CC=C2)C2=C1C=CC=C2	C1CCOC1	375
CC1=CC(C)=C(B(C2=C(C)C=C(C)C=C2C)C3=C(C)C=C(N4C5=C(C=CC=C5)C6=C4C=CC(N(C7=CC=CC=C7)C8=CC=CC=C8)=C6)C=C3C)C(C)=C1	CC1=CC=CC=C1	375
O=S(C1=CC(C)=C(N2C3=CC=CC=C3C4(C5=C2C=CC=C5)C6=CC=CC7=C6N(C8=C4C=CC=C8)C9=CC=CC=C97)C=C1)(C%10=CC(C)=C(C=C%10)N%11C%12=CC=CC=C%12C%13(C%14=C%11C=CC=C%14)C%15=CC=CC%16=C%15N(C%17=C%13C=CC=C%17)C%18=CC=CC=C%18%16)=O	CC1=CC=CC=C1	375
C12=CC=CC=C1OC3=C4B2C5=C(OC4=CC(N6C(C=CC=C7)=C7C8(C9=C(C%10(C%11=C8C=CC=C%11)C%12=C(C%13=C%10C=CC=C%13)C=CC=C%12)C=CC=C9)C%14=CC=CC=C6%14)=C3)C=CC=C5	CC1=CC=CC=C1	375
C1=CC2=C(C=C1)B1C3=C(C=CC=C3)OC3=C1C(=CC(N1C4=C(C=CC=C4)C4(C5=C1C=CC=C5)C1=C(C=CC=C1)N(C1=CC5=C6B(C7=C(C=CC=C7)OC6=C1)C1=C(C=CC=C1)O5)C1=C4C=CC=C1)=C3)O2	CC1=CC=CC=C1	375
CC(C)(C1=CC2=C(N(C3=C2C=C(C=C3)C(C)(C)C)C4=CC=C(C=C4)C5=NC(C6=CC=CC=C6)=NC(C7=CC=CC=C7)=N5)C(C8=CC=CC=C8)=C1)C	CC1=CC=CC=C1	375
O=S(C1=CC(C)=C(N2C3=CC=CC=C3C4(C5=CC=CC6=C5N(C7=CC=CC=C76)C8=C4C=CC=C8)C9=C2C=CC=C9)C=C1)(C%10=CC(C)=C(N%11C%12=CC=CC=C%12C%13(C%14=CC=CC%15=C%14N(C%16=CC=CC=C%16%15)C%17=C%13C=CC=C%17)C%18=C%11C=CC=C%18)C=C%10)=O	CC1=CC=CC=C1	375
O=C(C1=CC=C(N(C2=CC=CC=C2)C2=CC3=C(C=CC=C3)C=C2)C=C1)C1=CC=C(N(C2=CC=CC=C2)C2=CC3=C(C=CC=C3)C=C2)C=C1	C1CCOC1	375
C1(N(C2=C(O3)C=CC=C2)C4=C3C=CC=C4)=CC=C(C=C1)C5=NN=C(N5C6=CC=CC=C6)C7=CC=C(N(C8=C(O9)C=CC=C8)C%10=C9C=CC=C%10)C=C7	CC1=CC=CC=C1	376
CC1=CC=CC=C1C1=NC(C2=CC=CC=C2)=NC(C2=CC=C(N3C4=C(C=CC=C4)C(C)(C)C4=C3C=CC=C4)C=C2C)=N1	CC1=CC=CC=C1	376
CC(C)(C1=CC2=C(OC3=CC(N4C5=C(C6=C4C=CC(C(C)(C)C)=C6)C=C(C=C5)C(C)(C)C)=CC7=C3B2C8=C(O7)C=CC(C(C)(C)C)=C8)C=C1)C	CC1=CC=CC=C1	376
CC1=CC2=C(C=C1)N(C3=C2C=C(C)C=C3)C4=NC(N5C6=C(C7=C5C=CC(C)=C7)C=C(C)C=C6)=CC(C8=CC(N9C%10=C(C%11=C9C=CC(C)=C%11)C=C(C)C=C%10)=NC(N(C%12=C%13C=C(C)C=C%12)C%14=C%13C=C(C)C=C%14)=C8)=C4	CC1=CC=CC=C1	376
FC(F)(F)C1=CC=C(C2=NN=C(C3=CC(C4=NN=C(C5=CC=C(C(F)(F)F)C=C5)O4)=C(N4C5=CC=CC=C5C5=C4C=CC=C5)C=C3N3C4=CC=CC=C4C4=C3C=CC=C4)O2)C=C1	CC1=CC=CC=C1	376
N#CC1=C(C#N)C=C(N2C3=C(C=CC=C3)C3=C2C=CC=C3)C(N2C3=C(C=CC=C3)C3=C2C=CC=C3)=C1	CC1=CC=CC=C1	376
N#CC1=C2C(=C(C#N)C3=C1N(C1=CC=CC=C1)C1=CC=C4C=CC=CC4=C1C1=C(C=CC4=CC=CC=C41)N3C1=CC=CC=C1)N(C1=CC=CC=C1)C1=C(C3=CC=CC=C3C=C1)C1=C3C=CC=CC3=CC=C1N2C1=CC=CC=C1	C1CCOC1	377
O=S(C1=CC=C(C=C1)N2C3=CC=CC=C3C4(C5=C2C=CC=C5)C6=CC=CC7=C6N(C8=C4C=CC=C8)C9=CC=CC=C97)(C%10=CC=C(C=C%10)N%11C%12=CC=CC=C%12C%13(C%14=C%11C=CC=C%14)C%15=CC=CC%16=C%15N(C%17=C%13C=CC=C%17)C%18=CC=CC=C%18%16)=O	CC1=CC=CC=C1	378
CC(C)(C)C1=CC2=C(C=C1)OC1=CC(N3C4=C(C=C(N5C6=C(C=CC=C6)C6=C5C=CC=C6)C=C4)C4=C3C=CC(N3C5=C(C=CC=C5)C5C=CC=CC53)=C4)=CC3=C1B2C1=C(C=CC(C(C)(C)C)=C1)O3	CC1=CC=CC=C1	378
CC(C)(C1=CC2=C(OC3=CC(N4C5=C(C6=C4C=CC(C7=CC=C(C(C)(C)C)C=C7)=C6)C=C(C8=CC=C(C(C)(C)C)C=C8)C=C5)=CC9=C3B2C%10=C(O9)C=CC(C(C)(C)C)=C%10)C=C1)C	CC1=CC=CC=C1	378
CC(C)(C)C1=CC=C(C2=CC3=C(C=C2)N(C2=CC4=C5B(C6=C(C=CC(C(C)(C)C)=C6)OC5=C2)C2=C(C=CC(C(C)(C)C)=C2)O4)C2=C3C=C(C3=CC=C(C(C)(C)C)C=C3)C=C2)C=C1	CC1=CC=CC=C1	378
CC(C)(C)C1=CC2=C(C=C1)N(C1=CC=C(C3=NC(C4=CC=CC=C4)=NC(C4=CC=CC=C4)=N3)C=C1)C1=C2C=C(C(C)(C)C)C=C1C1=CC=C(N2C3=C(C=CC=C3)C3=C2C=CC=C3)C=C1	CC1=CC=CC=C1	378
CC(C)(C)C1=CC2=C(C=C1)N(C1=CC=C(C3=NC(C4=CC=CC=C4)=NC(C4=CC=CC=C4)=N3)C=C1)C1=C2C=C(C(C)(C)C)C=C1C1=CC2=C(C=C1)N(C1=CC=CC=C1)C1=C2C=CC=C1	CC1=CC=CC=C1	378
[H]C1=C(N2C3=CC=CC=C3C4(C5=CC=CC6=C5N(C7=CC=CC=C76)C8=C4C=CC=C8)C9=C2C=CC=C9)C=CC(S(=O)(C%10=CC([H])=C(N%11C%12=CC=CC=C%12C%13(C%14=CC=CC%15=C%14N(C%16=CC=CC=C%16%15)C%17=C%13C=CC=C%17)C%18=C%11C=CC=C%18)C=C%10)=O)=C1	CC1=CC=CC=C1	378
C1=CC2=C(C=C1)N(C1=CC3=C(C=C1)C1=C(C=C(N4C5=C(C=CC=C5)OC5=C4C=CC=C5)C=C1)C1=C3N=CC=N1)C1=C(C=CC=C1)O2	CC1=CC=CC=C1	379
CC(C)(C)C1=CC2=C(C=C1)OC1=CC(CN3C4=C(C=C(N(C5=CC=CC=C5)C5=CC=CC=C5)C=C4)C4=C3C=CC(N(C3=CC=CC=C3)C3=CC=CC=C3)=C4)=CC3=C1B2C1=C(C=CC(C(C)(C)C)=C1)O3	CC1=CC=CC=C1	379
CC(C)(C1=CC2=C(OC3=CC(N4C5=C(C6=C4C=CC(C7=CC=C(C(C)(C)C)C=C7)=C6)C=C(C8=CC=C(C(C)(C)C)C=C8)C=C5)=CC9=C3B2C%10=C(O9)C=CC(C(C)(C)C)=C%10)C=C1)C	CC(C)(C1=CC2=C(OC3=CC(N4C5=C(C6=C4C=CC(C7=CC=C(C(C)(C)C)C=C7)=C6)C=C(C8=CC=C(C(C)(C)C)C=C8)C=C5)=CC9=C3B2C%10=C(O9)C=CC(C(C)(C)C)=C%10)C=C1)C	379
CC(C)(C)C1=CC=C(C2=CC3=C(C=C2)N(C2=CC4=C5B(C6=C(C=CC(C(C)(C)C)=C6)OC5=C2)C2=C(C=CC(C(C)(C)C)=C2)O4)C2=C3C=C(C3=CC=C(C(C)(C)C)C=C3)C=C2)C=C1	CC(C)(C)C1=CC=C(C2=CC3=C(C=C2)N(C2=CC4=C5B(C6=C(C=CC(C(C)(C)C)=C6)OC5=C2)C2=C(C=CC(C(C)(C)C)=C2)O4)C2=C3C=C(C3=CC=C(C(C)(C)C)C=C3)C=C2)C=C1	379
CC(C)(C)C1=CC=C2OC3=CC(N4C5=C(C=C(C6=CC=C7C(=C6)C6=C(C=CC=C6)N7C6=CC=CC=C6)C=C5)C5=C4C=CC(C4=CC6=C(C=C4)N(C4=CC=CC=C4)C4=CC=CC=C46)=C5)=CC4=C3B(C2=C1)C1=C(C=CC(C(C)(C)C)=C1)O4	CC1=CC=CC=C1	380
CC1=CC=CC=C1C1=NC(C2=CC=C(N3C4=C(C=CC=C4)C(C)(C)C4=C3C=CC=C4)C=C2)=NC(C2=CC=CC=C2C)=N1	CC1=CC=CC=C1	380
CC(C)(C)C1=CC(B2C3=CC(C(C)(C)C)=CC=C3OC4=C2C5=CC(N6C(C=CC=C7)=C7C8(C9=C(C%10(C%11=C8C=CC=C%11)C%12=C(C%13=C%10C=CC=C%13)C=CC=C%12)C=CC=C9)C%14=CC=CC=C6%14)=C4)=C(O5)C=C1	CC1=CC=CC=C1	380
CC(C)(C1=CC=C2OC3=CC(N(C4=C5C=CC=C4)C6=CC=CC=C6C75C8=CC=CC=C8N(C9=C7C=CC=C9)C%10=CC%11=C%12B(C%13=C(O%11)C=CC(C(C)(C)C)=C%13)C%14=CC(C(C)(C)C)=CC=C%14OC%12=C%10)=CC%15=C3B(C%16=C(O%15)C=CC(C(C)(C)C)=C%16)C2=C1)C	CC1=CC=CC=C1	380
CC(C)(C)C1=CC2=C(C=C1)OC1=CC(N3C4=CC=C(C5=CC=C6C(=C5)C5=C(C=CC=C5)N6C5=CC=CC=C5)C=C4C4=C3C=CC(C3=CC5=C(C=C3)N(C3=CC=CC=C3)C3=CC=CC=C35)=C4)=CC3=C1B2C1=C(C=CC(C(C)(C)C)=C1)O3	CC1=CC=CC=C1	380
CC(C)(C)C1=CC2=C(C=C1)OC1=CC(N3C4=C(C=C(N5C6=C(C=CC=C6)C6=C5C=CC=C6)C=C4)C4=C3C=CC(N3C5=C(C=CC=C5)C5C=CC=CC53)=C4)=CC3=C1B2C1=C(C=CC(C(C)(C)C)=C1)O3	CC(C)(C)C1=CC2=C(C=C1)OC1=CC(N3C4=C(C=C(N5C6=C(C=CC=C6)C6=C5C=CC=C6)C=C4)C4=C3C=CC(N3C5=C(C=CC=C5)C5C=CC=CC53)=C4)=CC3=C1B2C1=C(C=CC(C(C)(C)C)=C1)O3	380
CC1=CC(C)=C(B(C2=C(C)C=C(C)C=C2C)C2=C(C)C=C(N3C4=C(C=CC=C4)C(C)(C)C4=C3C=CC=C4)C=C2C)C(C)=C1	CC1=CC=CC=C1	380
CC(C)(C)C1=CC2=C(C=C1)N(C1=CC=C(C3=NC(C4=CC=CC=C4)=NC(C4=CC=CC=C4)=N3)C=C1)C1=C2C=C(C(C)(C)C)C=C1	CC1=CC=CC=C1	380
CC(C)(C)C1=CC2=C(C=C1)N1C3=CC=C(C4=NC(C5=CC=CC=C5)=NC(C5=CC=CC=C5)=N4)C=C3C3=CC=CC(N4C5=C(C=CC=C5)C5=C4C=CCC5)=C3C3=CC(C(C)(C)C)=CC2=C31	CC1=CC=CC=C1	380
CC(C)(C)C1=CC=C2OC3=C4B(C2=C1)C1=C(C=CC(C(C)(C)C)=C1)OC4=CC(N1C2=C(C=CC=C2)C(C)(C)C2=C1C=CC=C2)=C3	CC1=CC=CC=C1	381
CC1=CC(N2C3=C(C=CC=C3)C(C)(C)C3=C2C=CC=C3)=CC=C1C1=NC(C2=CC=CC=C2)=NC(C2=CC=CC=C2)=N1	CC1=CC=CC=C1	381
CC(C)(C)C1=CC=C(OC2=C3)C(B(C4=C(O5)C=CC(C(C)(C)C)=C4)C2=C5C=C3N6C7=CC=CC=C7C8(C9=C(N(C%10=CC=CC=C%108)C%11=CC=C(C(C)(C)C)C=C%11)C=CC=C9)C%12=C6C=CC=C%12)=C1	CC1=CC=CC=C1	381
CC(C)(C)C1=CC2=C(C=C1)OC1=CC(N3C4=C(C=CC=C4)C4(C5=C(C=CC=C5)C5=C4C=CC=C5)C4=C3C=CC=C4)=CC3=C1B2C1=C(C=CC(C(C)(C)C)=C1)O3	CC1=CC=CC=C1	381
CC(C)(C)C1=CC2=C(C=C1)OC1=CC(CN3C4=C(C=C(N(C5=CC=CC=C5)C5=CC=CC=C5)C=C4)C4=C3C=CC(N(C3=CC=CC=C3)C3=CC=CC=C3)=C4)=CC3=C1B2C1=C(C=CC(C(C)(C)C)=C1)O3	CC(C)(C)C1=CC2=C(C=C1)OC1=CC(CN3C4=C(C=C(N(C5=CC=CC=C5)C5=CC=CC=C5)C=C4)C4=C3C=CC(N(C3=CC=CC=C3)C3=CC=CC=C3)=C4)=CC3=C1B2C1=C(C=CC(C(C)(C)C)=C1)O3	381
CC(C)(C)C1=CC2=C(C=C1)OC1=CC(N3C4=C(C=C(C5=CC=C6C(=C5)C5=C(C=CC=C5)N6C5=CC=CC=C5)C=C4)C4=C3C=CC(C3=CC5=C(C=C3)N(C3=CC=CC=C3)C3=C5C=CC=C3)=C4)=CC3=C1B2C1=C(C=CC(C(C)(C)C)=C1)O3	CC(C)(C)C1=CC2=C(C=C1)OC1=CC(N3C4=C(C=C(C5=CC=C6C(=C5)C5=C(C=CC=C5)N6C5=CC=CC=C5)C=C4)C4=C3C=CC(C3=CC5=C(C=C3)N(C3=CC=CC=C3)C3=C5C=CC=C3)=C4)=CC3=C1B2C1=C(C=CC(C(C)(C)C)=C1)O3	382
C1=CC=C(N2C3=CC=CC=C3C3=C2C=C2OC4=CC=CC=C4B4C5=C(C=CC=C5)OC3=C42)C=C1	CC1=CC=CC=C1	382
C1(C2=CC(N=C3OC(C4=CC=CC=C4)=CC3=N5)=C5C=C2)=CC=CC=C1	C(Cl)Cl	382
CC1=CC=CC2=C1N(C3=C2C=CC=C3)C4=CC(N5C6=C(C7=C5C(C)=CC=C7)C=CC=C6)=C(C=C4C#N)C#N	CC1=CC=CC=C1	383
CC1(C)C2=C(C=CC=C2)N(C2=CC=C(C3=NC(C4=CC=CC=C4)=NC(C4=CC=CC=C4)=N3)C=C2)C2=C1C=CC=C2	CC1=CC=CC=C1	384
C1=CC=C(C2=CC3=C(C=C2)N(C2=CC(N4C5=C(C=C(C6=CC=CC=C6)C=C5)C5=C4C=CC(C4=CC=CC=C4)=C5)=NC=N2)C2=C3C=C(C3=CC=CC=C3)C=C2)C=C1	CC1=CC=CC=C1	384
CC1(C)C2=CC=CC3=C2B2C4=C(C=CC=C4C(C)(C)C4=C2C1=CC(N1C2=C(C=CC=C2)C(C)(C)C2=C1C=CC=C2)=C4)O3	CC1=CC=CC=C1	385
CC1=CC=C(S(=O)(=O)C2=CC(N3C4=C(C=C(C(C)(C)C)C=C4)C4=C3C=CC(C(C)(C)C)=C4)=NC(N3C4=C(C=C(C(C)(C)C)C=C4)C4=C3C=CC(C(C)(C)C)=C4)=C2)C=C1	CC1=CC=CC=C1	385
CC(C)(C)C1=CC2=C(C=C1)OC1=C3B2C2=CC=C(N4C5=C(C=CC=C5)C(C)(C)C5=C4C=CC=C5)C=C2OC3=CC=C1	CC1=CC=CC=C1	385
N#CC1=NC2=C(N=C1C#N)C1=C(C=C(N3C4=C(C=CC=C4)C4(C5=C(C=CC=C5)C5=C4C=CC=C5)C4=C3C=CC=C4)C=C1)C1=CC(N3C4=C(C=CC=C4)C4(C5=C(C=CC=C5)C5=C4C=CC=C5)C4=C3C=CC=C4)=CC=C12	CC1=CC=CC=C1	385
C1=CC2=C(C=C1)B1C3=C(C=CC=C3)OC3=C(C4=CC=C(N5C6=C(C=CC=C6)OC6=C5C=CC=C6)C=C4)C=CC(=C13)O2	CC1=CC=CC=C1	386
CC1=CC=C(S(=O)(=O)C2=CC(N3C4=C(C=C(C5=CC=CC=C5)C=C4)C4=C3C=CC(C3=CC=CC=C3)=C4)=NC(N3C4=C(C=C(C5=CC=CC=C5)C=C4)C4=C3C=CC(C3=CC=CC=C3)=C4)=C2)C=C1	CC1=CC=CC=C1	386
C1=CC2=C(C=C1)B1C3=C(C=CC=C3)OC3=C(C4=CC=C(N5C6=C(C=CC=C6)SC6=C5C=CC=C6)C=C4)C=CC(=C13)O2	CC1=CC=CC=C1	387
CC1=CC(C)=C(B(C2=C(C)C=C(C)C=C2C)C3=C(C)C=C(N4C5=C(C=C(C=C5)N(C6=CC=CC=C6)C7=CC=CC=C7)C8=C4C=CC(N(C9=CC=CC=C9)C%10=CC=CC=C%10)=C8)C=C3C)C(C)=C1	CC1=CC=CC=C1	387
CC(C)(C1=CC2=C(C=C1)OC1=C3B2C2=CC=C(N4C5=C(C=CC=C5)C(C)(C)C5=C4C=CC=C5)C=C2OC3=CC=C1)C1=CC2=C(C=C1)OC1=CC=CC3=C1B2C1=C(C=C(N2C4=C(C=CC=C4)C(C)(C)C4=C2C=CC=C4)C=C1)O3	CC1=CC=CC=C1	387
CC(C)(C)C1=CC2=C(C=C1)N(C1=CC=C3C(=O)C4=C(C=C(N5C6=C(C=C(C(C)(C)C)C=C6)C6=C5C=CC(C(C)(C)C)=C6)C=C4)N(C4=CC=CC=C4)C3=C1)C1=C2C=C(C(C)(C)C)C=C1	CC1=CC=CC=C1	387
CC1=CC=CC=C1C2=CC=C3O[B-]4(OC5=C(C6=[N+]4C(C3=C2)=CC=C6)C=C(C=C5)C7=C(C=CC=C7)C)F	CC1=CC=CC=C1	387
CC1(C)C2=CC=CC3=C2B2C4=C(C=CC=C4C(C)(C)C4=C2C1=CC(N1C2=C(C=CC=C2)C(C)(C)C2=C1C=CC=C2)=C4)C3	CC1=CC=CC=C1	388
CC1(C)C2=CC(N3C4=C(C=CC=C4)C(C)(C)C4=C3C=CC=C4)=CC3=C2B2C4=C(C=CC=C41)C(C)(C)C1=C2C(=CC=C1)C3(C)C	CC1=CC=CC=C1	388
C1(C2=CC3=NC4=C(C5=C(C6=C4C=CC=N6)N=CC=C5)N=C3O2)=CC=CC=C1	C(Cl)Cl	388
F[B-]1(OC2=CC(C3=CC=CC=C3C)=CC=C2C4=CC=CC5=[N+]14)OC6=C5C=CC(C7=C(C=CC=C7)C)=C6	CC1=CC=CC=C1	389
C1(C2=CC3=NC4=C(C5=C(C6=C4C=CC=C6)C=CC=C5)N=C3O2)=CC=CC=C1	C(Cl)Cl	389
C1(C2=NN=C(O2)C3=CC=C(N(C4=C(O5)C=CC=C4)C6=C5C=CC=C6)C=C3)=CC=CC=C1	CC1=CC=CC=C1	390
CC1=CC(C)=C(B(C2=CC3=C(C=C2)N2C4=C(C=CC=C4)C(C)(C)C4=C2C(=CC=C4)C3(C2=CC=CC=C2)C2=CC=CC=C2)C2=C(C)C=C(C)C=C2C)C(C)=C1	CC1=CC=CC=C1	390
BrC1=CC(C2=CC=C(N3C4=C(C=CC=C4)OC4=C3C=CC=C4)C=C2)=C2OC3=C(C=CC=C3)B3C4=C(C=CC=C4)OC1=C32	CC1=CC=CC=C1	391
COC1=CC2=C(C=C1)N(C1=CC=CC(N3C4=C(C=C(OC)C=C4)C4=C3C=CC(OC)=C4)=C1C#N)C1=C2C=C(OC)C=C1	CC1=CC=CC=C1	391
O=C(C1=CC=CC=C1O2)C(C=C3N4C5=C(C6=C4C=CC(C(C)(C)C)=C6)C=C(C(C)(C)C)C=C5)=C2C=C3N(C7=C8C=C(OC)C=C7)C9=C8C=CC=C9	O=C(C1=CC=CC=C1O2)C(C=C3N4C5=C(C6=C4C=CC(C(C)(C)C)=C6)C=C(C(C)(C)C)C=C5)=C2C=C3N(C7=C8C=C(OC)C=C7)C9=C8C=CC=C9	391
BrC1=CC(C2=CC=C(N3C4=C(C=CC=C4)SC4=C3C=CC=C4)C=C2)=C2OC3=C(C=CC=C3)B3C4=C(C=CC=C4)OC1=C32	CC1=CC=CC=C1	392
C1=CC=C(N(C2=CC=CC=C2)C2=CC3=C(C=C2)N(C2=CC=C(C4=CC(C5=CC=C(N6C7=C(C=C(N(C8=CC=CC=C8)C8=CC=CC=C8)C=C7)C7=C6C=CC(N(C6=CC=CC=C6)C6=CC=CC=C6)=C7)C=C5)=NC=N4)C=C2)C2=C3C=C(N(C3=CC=CC=C3)C3=CC=CC=C3)C=C2)C=C1	CC1=CC=CC=C1	392
N#CC1=CC=C(C2=C3C=CC=CC3=C(C3=CC=C(C4=NC5=C(O4)C4=C(C=CC=C4)C4=C5C=CC=C4)C=C3)C3=C2C=CC=C3)C=C1	CC1=CC=CC=C1	396
F[B-]12OC3=CC=C(N4C5=C(C=CC=C5)C6=C4C=CC=C6)C=C3C7=CC=CC(C8=C(C=CC(N9C%10=C(C=CC=C%10)C%11=C9C=CC=C%11)=C8)O2)=[N+]71	CC1=CC=CC=C1	398
CC1=CC(C)=C(B(C2=C(C)C=C(C)C=C2C)C3=C(C)C=C(N(C4=C5C=CC=C4)C6=C(O5)C=CC=C6)C=C3C)C(C)=C1	CC1=CC=CC=C1	399
CC(C)C1=CC=C(C2=CC3=C(C=C2)C2=C(N=C4OC(C5=CC=CC=C5)=CC4=N2)C2=C3C=C(C3=CC=C(C(C)C)C=C3)C=C2)C=C1	C(Cl)Cl	399
N#CC1=C(C2=C(C#N)C(N3C4=C(C=CC=C4)C4=C3C=CC=C4)=CC(N3C4=C(C=CC=C4)C4=C3C=CC=C4)=C2C#N)C(C#N)=C(N2C3=C(C=CC=C3)C3=C2C=CC=C3)C=C1N1C2=C(C=CC=C2)C2=C1C=CC=C2	C1CCOC1	400
CC1=CC(C)=C(B(C2=CC3=C(C=C2)N2C4=C(C=CC=C4)OC4=C2C(=CC=C4)C3(C2=CC=CC=C2)C2=CC=CC=C2)C2=C(C)C=C(C)C=C2C)C(C)=C1	CC1=CC=CC=C1	400
C12=CC=CC=C1C(C=C3C=CC=CC3=C4C5=C6NC7=CC=CC=C7C6=CC8=CC=CC=C85)=C4N2	C1CCOC1	400
C1=CC2=C(C=C1)N(C1=CC3=C(C=C1)C1=C(N=CC=N1)C1=C3C=C(N3C4=C(C=CC=C4)OC4=C3C=CC=C4)C=C1)C1=C(C=CC=C1)O2	CC1=CC=CC=C1	401
O=C(C1=CC=CC=C1)C1=CC=C(N2C3=C(C=CC=C3)C3=C2C(C2=C4C=CC=CC4=CC4=C2N(C2=CC=C(C(=O)C5=CC=CC=C5)C=C2)C2=C4C=CC=C2)=C2C=CC=CC2=C3)C=C1	C1CCOC1	401
N#CC1=CC=C2C(C3=C(C4=C2NC5C=C(F)C(N6C7=C(C8(C9=C6C=CC=C9)C%10=C(C%11=C8C=CC=C%11)C=CC=C%10)C=CC=C7)=CC5=N4)C=CC(C#N)=C3)=C1	CC1=CC=CC=C1	402
C1=CC=C(C2=CC=C(C3=NC(N4C5=C(C=CC=C5)C5=C4C4=C(C=C5)C5=C(C=CC=C5)N4C4=CC=CC=C4)=NC(N4C5=C(C=CC=C5)C5=C4C4=C(C=C5)C5=C(C=CC=C5)N4C4=CC=CC=C4)=N3)C=C2)C=C1	CC1=CC=CC=C1	403
F[B-]12OC3=CC(N4C5=C(C6=C4C=CC=C6)C=CC=C5)=CC=C3C7=CC=CC(C8=C(O2)C=C(C=C8)N9C%10=C(C%11=C9C=CC=C%11)C=CC=C%10)=[N+]71	CC1=CC=CC=C1	406
CC(C)(C1=CC2=C(N3C4=C(C(C5=C(N6C7=C(C8=C6C=CC=C8)C=CC=C7)C=CC=C53)=O)C=C(C=C24)C(C)(C)C)C=C1)C	CC1=CC=CC=C1	409
N#CC1=CC2=NC3=C(C4=CC=C(C=C4C5=C3C=CC(N6C7=C(C8(C9=C6C=CC=C9)C%10=C(C%11=C8C=CC=C%11)C=CC=C%10)C=CC=C7)=C5)N%12C%13=C(C%14(C%15=C%12C=CC=C%15)C%16=C(C%17=C%14C=CC=C%17)C=CC=C%16)C=CC=C%13)NC2C=C1C#N	CC1=CC=CC=C1	412
The testing set
C1=CC=C(C2N=C(C3=CCCC=C3)N=C(C3=CC=C(N4C5=C(C=C(N6C7=C(C=CC=C7)C7=C6C=CC=C7)C=C5)C5=C4C=CC(N4C6=C(C=CC=C6)C6=C4C=CC=C6)=C5)C=C3)N2)C=C1	CC1=CC=CC=C1	368
CC1(C)C2=C(C=CC=C2)N(C2=CC=C3B4C5=C(C=CC(C6(C7=CC8=C(C=C7)OC7=CC=CC9=C7B8C7=C(C=C(N8C%10=C(C=CC=C%10)C(C)(C)C%10=C8C=CC=C%10)C=C7)O9)C7=C(C=CC=C7)C7=C6C=CC=C7)=C5)OC5=C4C(=CC=C5)OC3=C2)C2=C1C=CC=C2	CC1=CC=CC=C1	388
CC(C)(C)C1=CC=C2C(=C1)C1=C(C=CC(C(C)(C)C)=C1)N2C1=CC=CC(S(=O)(=O)C2=CC=CC=C2)=C1	CC1=CC=CC=C1	342
C1(C2=CC3=C(N=C4OC(C5=CC=CC=C5)=CC4=N3)C=C2)=CC=CC=C1	C(Cl)Cl	387
CC(C)(C)C1=CC=C2C(=C1)C1=C(C=CC(C(C)(C)C)=C1)N2C1=CC=C(S(=O)(=O)C2=CC=CC=C2)C=C1	CN(C)C=O	344
CC1(C)C2=C(C=CC=C2)N(C2=CC(C(F)(F)F)=C(C3=C(C(F)(F)F)C=C(N4C5=C(C=CC=C5)C(C)(C)C5=C4C=CC=C5)C=C3)C=C2)C2=C1C=CC=C2	CN(C)C=O	293
COC1=CC=C(C2=NN=C(C3=CC(C4=NN=C(C5=CC=C(OC)C=C5)O4)=C(N4C5=CC=CC=C5C5=C4C=CC=C5)C=C3N3C4=CC=CC=C4C4=C3C=CC=C4)O2)C=C1	CC1=CC=CC=C1	371
N#CC1=CC=C(C=C1)C2=C3C=CC=CC3=C(C4=C2C=CC=C4)C5=CC=CC(C6=NC(C7=C(C8=C9C=CC=C8)C=CC=C7)=C9O6)=C5	CC1=CC=CC=C1	395
O=S(=O)(C1=CC=C(N(C2=CC=CC=C2)C2=CC=CC=C2)C=C1)C1=CC=C(S(=O)(=O)C2=CC=C(N(C3=CC=CC=C3)C3=CC=CC=C3)C=C2)C=C1	CC1=CC=CC=C1	354
C1=CC=C(N2C3=CC=CC=C3C3=C2C2=C(C4=C3N(C3=CC=CC=C3)C3=C4C=CC=C3)N(C3=CC4=C5B(C6=C(C=CC=C6)OC5=C3)C3=C(C=CC=C3)O4)C3=C2C=CC=C3)C=C1	CC1=CC=CC=C1	374
CC1=CC(N2C3=C(C=CC=C3)C(C)(C)C3=C2C=CC=C3)=CC(C)=C1C1=NC(C2=CC=CC=C2)=NC(C2=CC=CC=C2)=N1	CC1=CC=CC=C1	361
CC(C)(C)C1=CC=C2C(=C1)C1=C(C=CC(C(C)(C)C)=C1)N2C1=CC=CC(S(=O)(=O)C2=CC=CC=C2)=C1	CO	344
O=C(C1=CC=C(C=C1N2C3=CC=CC=C3)N4C5=C(C(C)(C6=C4C=CC=C6)C)C=CC=C5)C(C=C7)=C2C=C7N8C9=CC=CC=C9C(C)(C)C%10=CC=CC=C8%10	CC1=CC=CC=C1	393
CC(C)(C)C1=CC2=C(C=C1)OC1=CC(N3C4=C(C=C(C5=CC=C6C(=C5)C5=C(C=CC=C5)N6C5=CC=CC=C5)C=C4)C4=C3C=CC(C3=CC5=C(C=C3)N(C3=CC=CC=C3)C3=C5C=CC=C3)=C4)=CC3=C1B2C1=C(C=CC(C(C)(C)C)=C1)O3	CC1=CC=CC=C1	380
CC1=CC=C2C(=C1)C1=C(C=CC(C3=CC4=C(C=C3)N(C3=CC5=C6B(C7=C(C=CC=C7)OC6=C3)C3=C(C=CC=C3)O5)C3=CC=C(C5=CC=C6C(=C5)C5=C(C=CC(C)=C5)N6C5=CC=CC=C5)C=C34)=C1)N2C1=CC=CC=C1	CC1=CC=CC=C1	376
CC(C)C1=CC2=C(C=C1)N(C1=CC=C(C3=C(C#N)C(OC4=CC(C5=CC=C(N6C7=C(C=C(C(C)(C)C)C=C7)C7=C6C=CC(C(C)(C)C)=C7)C=C5)=CC=C4)=CC=C3)C=C1)C1=C2C=C(C(C)(C)C)C=C1	CC1=CC=CC=C1	346
CC(C)(C1=CC2=C(OC3=CC(N4C5=C(C6=C4C=CC(C(C)(C)C)=C6)C=C(C=C5)C(C)(C)C)=CC7=C3B2C8=C(O7)C=CC(C(C)(C)C)=C8)C=C1)C	CC1=CC=CC=C1	376
N#CC1=CC(C2=CCC(N(C3=CC=CC=C3)C3=CC=CC=C3)C=C2)=CC=C1	CN(C)C=O	341
COC1=CC2=C(C=C1)N(C1=CC3=C(C=C1N1C4=C(C=CC=C4)C4=C1C=CC=C4)C(=O)C1=CC=CC=C1O3)C1=C2C=CC=C1	CC1=CC=CC=C1	344
CC1=CC=C2C(=C1)C1=C(C=CC(C3=CC4=C(C=C3)N(C3=CC5=C6B(C7=C(C=CC=C7)O5)C5=C(CCC=C5)OC6=C3)C3=CC=C(C5=CC=C6C(=C5)C5=C(C=CC(C)=C5)N6C5=CC=CC=C5)C=C34)=C1)N2C1=CC=CC=C1	CC1=CC=CC=C1	376
CC1=CC=C2OC3=C4B(C2=C1)C1=C(C=CC(C)=C1)OC4=CC(N1C2=C(C=CC=C2)C2=C1C1=C(C4=C2N(C2=CC=CC=C2)C2=C4C=CC=C2)N(C2=CC=CC=C2)C2=C1C=CC=C2)=C3	CC1=CC=CC=C1	384
CC(C)(C)C1=CC=C2C(=C1)C1=C(C=CC(C(C)(C)C)=C1)N2C1=CC=C(S(=O)(=O)C2=CC(N3C4=CC=C(C(C)(C)C)C=C4C4=C3C=CC(C(C)(C)C)=C4)=CC=C2)C=C1	CN(C)C=O	345
C1=CC=C(C2=NC(C3=CC=CC=C3)=NC(C3=CC=C(N4C5=C(C=CC=C5)C5=C4C=CC(C4=CC=CC6=C4C4=C(C=CC=C4)N6C4=CC=C(C6=NC(C7=CC=CC=C7)=NC(C7=CC=CC=C7)=N6)C=C4)=C5)C=C3)=N2)C=C1	C1CCOC1	355
O=P(C1=CC=CC=C1)(C1=CC=CC=C1)C1=CC=C2NC3=C(C=C(P(=O)(C4=CC=CC=C4)C4=CC=CC=C4)C=C3)C2=C1	C(Cl)Cl	351
CC1=CC(C)=C(B(C2=C(C)C=C(C)C=C2C)C2=C(C)C=C(N3C4=C(C=C(N(C5=CC=CC=C5)C5=CC=CC=C5)C=C4)C4=C3C=CC(N(C3=CC=CC=C3)C3=CC=CC=C3)=C4)C=C2C)C(C)=C1	CC1=CC=CC=C1	387
CC1=CC(C)=C(B(C2=CC=C(N3C4=C(C=CC=C4)C4=C3C=CC=C4)C=C2)C2=C(C)C=C(C)C=C2C)C(C)=C1	CC1=CC=CC=C1	360
CC1=CC(N2C3=C(C=CC=C3)C(C)(C)C3=C2C=CC=C3)=CC(C)=C1B1C2=C(C=CC=C2)CC2=C1C=CC=C2	CC1=CC=CC=C1	317
CC(C)(C)C1=CC=C2OC3=CC(N4C5=C(C=CC=C5)C5=C4C4=C(C6=C5N(C5=CC=CC=C5)C5=C6C=CC=C5)N(C5=CC=CC=C5)C5=C4C=CC=C5)=CC4=C3B(C2=C1)C1=CC(C(C)(C)C)=CC=C1O4	CC1=CC=CC=C1	380
CC(C)(C)C1=CC=C2C(=C1)C1=C(C=CC(C(C)(C)C)=C1)N2C1=CC=C(S(=O)(=O)C2=CC(N3C4=CC=C(C(C)(C)C)C=C4C4=C3C=CC(C(C)(C)C)=C4)=CC=C2)C=C1	CC1=CC=CC=C1	344
CC(C)(C)C1=CC=CC=C1N(C1=CC=CC=C1)C1=CC=C(S(=O)(=O)C2=CC=C(S(=O)(=O)C3=CC=C(N(C4=CC=CC=C4)C4=C(C(C)(C)C)C=CC=C4)C=C3)C=C2)C=C1	CC1=CC=CC=C1	348
C1=CC=C(C2=CC(C3=CC=C(N4C5=CC=C6C7=C(C=CC=C7)C7(C8=C(C=CC=C8)C8=C7C=CC=C8)C6=C5C5=C4C=CC=C5)C=C3)=NC(C3=CC=CC=C3)=N2)C=C1	CC1=CC=CC=C1	367
C1=CC=C(N(C2=CC=CC=C2)C2=CC=C(C3=CC(C4=NC(C5=CC=CC(C6=CC=C(N(C7=CC=CC=C7)C7=CC=CC=C7)C=C6)=C5)=NC(C5=CC=CC(C6=CC=C(N(C7=CC=CC=C7)C7=CC=CC=C7)C=C6)=C5)=N4)=CC=C3)C=C2)C=C1	C(Cl)Cl	310
CC1(C)C2=C(C=CC=C2)N(C2=CC3=C(C=C2)C2=C(N=CC=N2)C2=C3C=C(N3C4=C(C=CC=C4)C(C)(C)C4=C3C=CC=C4)C=C2)C2=C1C=CC=C2	CC1=CC=CC=C1	370
N#CC1=CC=C2C(=C1)C1=C(C=CC(C#N)=C1)C1=C2NC2C=C(N3C4=C(C=CC=C4)C4(C5=C(C=CC=C5)C5=C4C=CC=C5)C4=C3C=CC=C4)C=CC2=N1	CC1=CC=CC=C1	399
CC(C)(C1=CC2=C(N(C3=CC=C(C=C3C(F)(F)F)C4=NC(C5=CC=CC=C5)=NC(C6=CC=CC=C6)=N4)C7=C2C=C(C=C7)C(C)(C)C)C=C1)C	CC1=CC=CC=C1	390
N#CC1=C(C#N)C=C(N2C3=C(C=C(C=C3)P(C4=CC=CC=C4)(C5=CC=CC=C5)=S)C6=C2C=CC=C6)C(N7C8=CC=C(C=C8C9=C7C=CC=C9)P(C%10=CC=CC=C%10)(C%11=CC=CC=C%11)=S)=C1	C(Cl)Cl	358
C12=CC3=C(C=C1C=CC=C2)N=C4C=C(C5=CC=CC=C5)OC4=N3	C(Cl)Cl	396
CC1(C)C2=C(C=CC=C2)N(C2=CC=C3C(=O)C4=C(C=C(N5C6=C(C=CC=C6)C(C)(C)C6=C5C=CC=C6)C=C4)N(C4=CC=C(C(F)(F)F)C=C4)C3=C2)C2=C1C=CC=C2	CC1=CC=CC=C1	386

## Sheet: emission
414 emission wavelength values as the training set and 100 ones as the
independent testing set for the transfer learning on the blue OLED emitters
Emitters	Solvents	Labels(nm)
The training set
C1=CC=C(N2C3=CC=C(C4=CC(N5C=CC=N5)=CC(N5C=CC=N5)=C4)C=C3C3=C2C=CC=C3)C=C1	C(Cl)Cl	380
C1=CC=C(N2C3=C(C=CC=C3)C3=C2C=CC=C3)C(C2=CC(N3C=CC=N3)=CC(N3C=CC=N3)=C2)=C1	C(Cl)Cl	397
C1=CC2=C(C=C1)B1C3=C(C=CC=C3)OC3=C1C(=CC=C3)O2	C(Cl)Cl	398
C1=CC(N2C3=C(C=CC=C3)C3=C2C=CC=C3)=CC(C2=CC(N3C=CC=N3)=CC(N3C=CC=N3)=C2)=C1	C(Cl)Cl	403
C1=CC2=C(C=C1)N(C1=CC(C3=CC(N4C=CC=N4)=CC(N4CCC=N4)=C3)=CC(N3C4=C(C=CC=C4)C4=C3C=CC=C4)=C1)C1=C2C=CC=C1	C(Cl)Cl	407
C1=CC=C(C2=CC3=C(C=C2)OC2=CC=CC4=C2B3C2=C(C=CC(C3=CC=CC=C3)=C2)O4)C=C1	C(Cl)Cl	410
C1=CC=C(C2=CC3=C(C=C2)B2C4=C(C=C(C5=CC=CC=C5)C=C4)OC4=C2C(=CC=C4)O3)C=C1	C(Cl)Cl	410
C1(C2=CC3=C(N=C4OC(C5=CC=CC=C5)=CC4=N3)C=C2)=CC=CC=C1	C(Cl)Cl	422
C1(C2=CC(N=C3OC(C4=CC=CC=C4)=CC3=N5)=C5C=C2)=CC=CC=C1	C(Cl)Cl	422
C1(C2=CC3=NC4=C(C5=C(C6=C4C=CC=N6)N=CC=C5)N=C3O2)=CC=CC=C1	C(Cl)Cl	424
C1=CC=C(N(C2=CC=CC=C2)C2=CC=C(C3=CC(C4=NC(C5=CC=CC(C6=CC=C(N(C7=CC=CC=C7)C7=CC=CC=C7)C=C6)=C5)=NC(C5=CC=CC(C6=CC=C(N(C7=CC=CC=C7)C7=CC=CC=C7)C=C6)=C5)=N4)=CC=C3)C=C2)C=C1	C(Cl)Cl	434
C1=CC=C(C2=CC(C3=CC=CC=C3)=C3OC4=C(C=CC=C4)B4C5=C(C=CC=C5)OC2=C43)C=C1	C(Cl)Cl	436
FC(F)(C1=C(C(N2C3=C(C4=C2C=CC=C4)C=CC=C3)=CC(N5C6=C(C7=C5C=CC=C7)C=CC=C6)=C1N8C9=C(C%10=C8C=CC=C%10)C=CC=C9)N%11C%12=C(C%13=C%11C=CC=C%13)C=CC=C%12)F	C(Cl)Cl	440
N#CC1=CC(C2=CCC(N(C3=CC=CC=C3)C3=CC=CC=C3)C=C2)=CC=C1	C(Cl)Cl	445
CC(C)(C)C1=CC=C2C(=C1)C1=C(C=CC(C(C)(C)C)=C1)N2C1=CC=C(S(=O)(=O)C2=CC=CC=C2)C=C1	C(Cl)Cl	445
C1(C2=CC3=NC4=C(C5=C(C6=C4C=CC=C6)C=CC=C5)N=C3O2)=CC=CC=C1	C(Cl)Cl	445
O=P(C1=CC=CC=C1)(C1=CC=CC=C1)C1=CC=C(N2C3=C(C=CC=C3)C(C3=CC=CC=C3)(C3=CC=CC=C3)C3=C2C=CC=C3)C=C1	C(Cl)Cl	446
O=P(C1=CC=CC=C1)(C2=CC=C(C=C2)N3C4=C(C(C5=CC=CC=C5)(C6=C3C=CC=C6)C7=CC=CC=C7)C=CC=C4)C8=CC=C(N9C%10=C(C(C%11=CC=CC=C%11)(C%12=C9C=CC=C%12)C%13=CC=CC=C%13)C=CC=C%10)C=C8	C(Cl)Cl	446
CC(C)(C)C1=CC=C2C(=C1)C1=C(C=CC(C(C)(C)C)=C1)N2C1=CC=C(S(=O)(=O)C2=CC=C(N3C4=CC=C(C(C)(C)C)C=C4C4=C3C=CC(C(C)(C)C)=C4)C=C2)C=C1	C(Cl)Cl	449
CC(C)(C)C1=CC=C2C(=C1)C1=C(C=CC(C(C)(C)C)=C1)N2C1=CC=CC(S(=O)(=O)C2=CC=CC=C2)=C1	C(Cl)Cl	451
CC(C)(C)C1=CC=C2C(=C1)C1=C(C=CC(C(C)(C)C)=C1)N2C1=CC=C(S(=O)(=O)C2=CC(N3C4=CC=C(C(C)(C)C)C=C4C4=C3C=CC(C(C)(C)C)=C4)=CC=C2)C=C1	C(Cl)Cl	452
O=P(C1=CC=C(N2C3=C(C=CC=C3)C(C4=C2C=CC=C4)(C5=CC=CC=C5)C6=CC=CC=C6)C=C1)(C7=CC=C(C=C7)N8C9=C(C=CC=C9)C(C%10=C8C=CC=C%10)(C%11=CC=CC=C%11)C%12=CC=CC=C%12)C%13=CC=C(N%14C%15=C(C=CC=C%15)C(C%16=C%14C=CC=C%16)(C%17=CC=CC=C%17)C%18=CC=CC=C%18)C=C%13	C(Cl)Cl	452
CC(C)C1=CC=C(C2=CC3=C(C=C2)C2=C(N=C4OC(C5=CC=CC=C5)=CC4=N2)C2=C3C=C(C3=CC=C(C(C)C)C=C3)C=C2)C=C1	C(Cl)Cl	457
CC(C)(C)C1=CC=C2C(=C1)C1=C(C=CC(C(C)(C)C)=C1)N2C1=CC(S(=O)(=O)C2=CC=CC(N3C4=CC=C(C(C)(C)C)C=C4C4=C3C=CC(C(C)(C)C)=C4)=C2)=CC=C1	C(Cl)Cl	458
C1=CC=C(N(C2=CC=CC=C2)C2=CC3=C4B(C5=CC=CC=C5N3C3=CC=CC=C3)C3=C(C=CC=C3)N(C3=CC=CC=C3)C4=C2)C=C1	C(Cl)Cl	458
CC(C)(C)C1=CC=C(N2C3=CC(N(C4=CC=CC=C4)C4=CC=CC=C4)=CC4=C3B(C3=CC(C(C)(C)C)=CC=C3N4C3=CC=C(C(C)(C)C)C=C3)C3=C2C=CC(C(C)(C)C)=C3)C=C1	C(Cl)Cl	462
CC(C)(C)C1=CC=C(N(C2=CC=C(C(C)(C)C)C=C2)C2=CC3=C4B(C5=CC(C(C)(C)C)=CC=C5N3C3=CC=C(C(C)(C)C)C=C3)C3=C(C=CC(C(C)(C)C)=C3)N(C3=CC=C(C(C)(C)C)C=C3)C4=C2)C=C1	C(Cl)Cl	463
O=P(C1=CC=CC=C1)(C1=CC=CC=C1)C1=CC=C2NC3=C(C=C(P(=O)(C4=CC=CC=C4)C4=CC=CC=C4)C=C3)C2=C1	C(Cl)Cl	465
N#CC1=CC=C(C=C1)N2C3=C(C4(C5=C2C=CC=C5)C6=C(N(C7=C4C=CC=C7)C8=CC=C(C#N)C=C8)C=CC=C6)C=CC=C3	C(Cl)Cl	475
FC(C1=C(N2C3=C(C=CC=C3)C4=C2C=CC=C4)C(N5C6=C(C=CC=C6)C7=C5C=CC=C7)=C(N8C9=C(C=CC=C9)C%10=C8C=CC=C%10)C(N%11C%12=C(C=CC=C%12)C%13=C%11C=CC=C%13)=C1N%14C%15=C(C=CC=C%15)C%16=C%14C=CC=C%16)(F)F	C(Cl)Cl	481
C1=CC=C(N2C3=CC=C(C4=CC(C5=NC(C6=CC=CC(C7=CC=C8C(=C7)C7=C(C=CC=C7)N8C7=CC=CC=C7)=C6)=NC(C6=CC=CC(C7=CC8=C(C=C7)N(C7=CC=CC=C7)C7=CC=CC=C78)=C6)=N5)=CC=C4)C=C3C3=C2C=CC=C3)C=C1	C(Cl)Cl	485
N#CC1=C(C=C(C(N2C3=CC=C(P(C4=CC=CC=C4)(C5=CC=CC=C5)=O)C=C3C6=C2C=CC=C6)=C1)N7C8=C(C9=C7C=CC=C9)C=C(P(C%10=CC=CC=C%10)(C%11=CC=CC=C%11)=O)C=C8)C#N	C(Cl)Cl	498
CC1(C)C(C=CC=C2)=C2N(C3=CC=C(C#N)C=C3)C4=C1C=CC=C4	C(Cl)Cl	500
N#CC1=C(C#N)C=C(N2C3=C(C=C(C=C3)P(C4=CC=CC=C4)(C5=CC=CC=C5)=S)C6=C2C=CC=C6)C(N7C8=CC=C(C=C8C9=C7C=CC=C9)P(C%10=CC=CC=C%10)(C%11=CC=CC=C%11)=S)=C1	C(Cl)Cl	501
C1=CC2=C(C=C1)N(C1=CC3=C(C=C1)N(C1=CC4=C5C(=C1)C1=C(C=CC=C1)N5C1=C4C=CC=C1)C1=C3C=CC=C1)C1=C2C=CC=C1	C=CC1=CC=CC=C1	400
CC1(C)C2=C(C=CC=C2)N(C2=CC3=C4C(=C2)C2=C(C=CC=C2)N4C2=C3C=CC=C2)C2=C1C=CC=C2	C=CC1=CC=CC=C1	441
CC1(C)C2=C(C=CC=C2)N(C2=CC3=C(C=C2)N2C4=C(C=CC=C4)C4=CC(N5C6=C(C=CC=C6)C(C)(C)C6=C5C=CC=C6)=CC3=C42)C2=C1C=CC=C2	C=CC1=CC=CC=C1	446
C1([Si]2(C3=C(N(C4=C2C=CC=C4)C5=CC=C6B7C8=C(OC9=C7C(OC6=C5)=CC=C9)C=C(C=C8)N%10C%11=C([Si](C%12=CC=CC=C%12)(C%13=C%10C=CC=C%13)C%14=CC=CC=C%14)C=CC=C%11)C=CC=C3)C%15=CC=CC=C%15)=CC=CC=C1	C1([Si]2(C3=C(N(C4=C2C=CC=C4)C5=CC=C6B7C8=C(OC9=C7C(OC6=C5)=CC=C9)C=C(C=C8)N%10C%11=C([Si](C%12=CC=CC=C%12)(C%13=C%10C=CC=C%13)C%14=CC=CC=C%14)C=CC=C%11)C=CC=C3)C%15=CC=CC=C%15)=CC=CC=C1	476
C1([Si]2(C3=C(N(C4=C2C=CC=C4)C5=CC6=C7B(C8=C(O6)C=CC=C8)C9=CC=CC=C9OC7=C5)C=CC=C3)C%10=CC=CC=C%10)=CC=CC=C1	C1([Si]2(C3=C(N(C4=C2C=CC=C4)C5=CC6=C7B(C8=C(O6)C=CC=C8)C9=CC=CC=C9OC7=C5)C=CC=C3)C%10=CC=CC=C%10)=CC=CC=C1	458
C1=CC2=C(C=C1)B1C3=C(C=CC=C3)OC3=C(C4=CC=C(N5C6=C(C=CC=C6)OC6=C5C=CC=C6)C=C4)C=CC(=C13)O2	C1=CC(N2C3=C(C=CC=C3)C3=C2C=CC=C3)=CC(N2C3=C(C=CC=C3)C3=C2C=CC=C3)=C1	450
C1=CC2=C(C=C1)B1C3=C(C=CC=C3)OC3=C(C4=CC=C(N5C6=C(C=CC=C6)SC6=C5C=CC=C6)C=C4)C=CC(=C13)O2	C1=CC(N2C3=C(C=CC=C3)C3=C2C=CC=C3)=CC(N2C3=C(C=CC=C3)C3=C2C=CC=C3)=C1	470
BrC1=CC(C2=CC=C(N3C4=C(C=CC=C4)SC4=C3C=CC=C4)C=C2)=C2OC3=C(C=CC=C3)B3C4=C(C=CC=C4)OC1=C32	C1=CC(N2C3=C(C=CC=C3)C3=C2C=CC=C3)=CC(N2C3=C(C=CC=C3)C3=C2C=CC=C3)=C1	470
BrC1=CC(C2=CC=C(N3C4=C(C=CC=C4)OC4=C3C=CC=C4)C=C2)=C2OC3=C(C=CC=C3)B3C4=C(C=CC=C4)OC1=C32	C1=CC(N2C3=C(C=CC=C3)C3=C2C=CC=C3)=CC(N2C3=C(C=CC=C3)C3=C2C=CC=C3)=C1	476
C1(C2=NC(C3=CC=CC=C3)=NC(C4=CC=C(C=C4)N5C6=C(C7=C5C=CC(C8=CC=C9C(C=CN9C%10=CN=CC=C%10)=C8)=C7)C=CC=C6)=N2)=CC=CC=C1	C1=CC(N2C3=C(C=CC=C3)C3=C2C=CC=C3)=NC(N2C3=C(C=CC=C3)C3=C2C=CC=C3)=C1	476
C1=CC=C(C2=NC(C3=CC=CC=C3)=NC(C3=CC=C(N4C5=C(C=CC=C5)C5=C4C=CC(C4=CC=C6C(=C4)C4=C(C=CC=C4)N6C4=CN=CC=C4)=C5)C=C3)=N2)C=C1	C1=CC(N2C3=C(C=CC=C3)C3=C2C=CC=C3)=NC(N2C3=C(C=CC=C3)C3=C2C=CC=C3)=C1	479
C1=CC=C(C2=NC(C3=CC=CC=C3)=NC(C3=CC=C(N4C5=C(C=CC=C5)C5=C4C=CC(C4=CC=C6C(=C4)C4=C(C=CC=C4)N6C4=CC=CC=C4)=C5)C=C3)=N2)C=C1	C1=CC(N2C3=C(C=CC=C3)C3=C2C=CC=C3)=NC(N2C3=C(C=CC=C3)C3=C2C=CC=C3)=C1	486
CCN1C2=CC=CC=C2C3=CC4=C(C(C5=CC=CC=C5)=C31)N(C6=C4C=CC=C6)C(C=C7)=CC=C7C8=NC(C9=CC=CC=C9)=NC(C%10=CC=CC=C%10)=N8	C1=CC(N2C3=C(C=CC=C3)C3=C2C=CC=C3)=NC(N2C3=C(C=CC=C3)C3=C2C=CC=C3)=C1	486
C1=CC=C(C2=NC(C3=CC=CC=C3)=NC(C3=CC=C(N4C5=C(C=C(C6=CC=C7C(=C6)C6=C(C=CC=C6)N7C6=CC=CC=C6)C=C5)C5=C4C=CC(C4=CC6=C(C=C4)N(C4=CC=CC=C4)C4=C6C=CC=C4)=C5)C=C3)=N2)C=C1	C1=CC(N2C3=C(C=CC=C3)C3=C2C=CC=C3)=NC(N2C3=C(C=CC=C3)C3=C2C=CC=C3)=C1	490
CCN1C2=CC=CC=C2C3=CC4=C(C=C31)N(C5=C4C=CC=C5)C(C=C6)=CC=C6C7=NC(C8=CC=CC=C8)=NC(C9=CC=CC=C9)=N7	C1=CC(N2C3=C(C=CC=C3)C3=C2C=CC=C3)=NC(N2C3=C(C=CC=C3)C3=C2C=CC=C3)=C1	491
C1=CC=C(C2=CC(C3=CC=C(N4C5=C(C=CC=C5)C5=C4C=CC4=C5SC5=C4C=CC=C5)C=C3)=NC(C3=CC=CC=C3)=N2)C=C1	C1=CC=C(C=C1)P(=O)(C2=CC=CC=C2)C3=CC=CC=C3OC4=CC=CC=C4P(=O)(C5=CC=CC=C5)C6=CC=CC=C6	433
CC1(C2=C(N(C3=C1C=CC=C3)C4=CC5=C(P(C6=CC=CC=C6)(C7=CC=CC=C7O5)=O)C=C4)C=CC=C2)C	C1=CC=C(C=C1)P(=O)(C2=CC=CC=C2)C3=CC=CC=C3OC4=CC=CC=C4P(=O)(C5=CC=CC=C5)C6=CC=CC=C6	434
C1=CC=C(C2=CC(C3=CC=C(N4C5=C(C=CC=C5)C5=C4C=CC4=C5OC5=C4C=CC=C5)C=C3)=NC(C3=CC=CC=C3)=N2)C=C1	C1=CC=C(C=C1)P(=O)(C2=CC=CC=C2)C3=CC=CC=C3OC4=CC=CC=C4P(=O)(C5=CC=CC=C5)C6=CC=CC=C6	434
C1=CC=C(C2=CC(C3=CC=C(N4C5=C(C=CC=C5)C5=C4C=CC4=C5SC5=C4C=CC=C5)C=C3)=NC(C3=CC=CC=C3)=N2)C=C1	C1=CC=C(C=C1)P(=O)(C2=CC=CC=C2)C3=CC=CC=C3OC4=CC=CC=C4P(=O)(C5=CC=CC=C5)C6=CC=CC=C6	435
C1=CC=C(C2=CC(C3=CC=C(N4C5=C(C=CC=C5)C5=C4C=CC4=C5OC5=C4C=CC=C5)C=C3)=NC(C3=CC=CC=C3)=N2)C=C1	C1=CC=C(C=C1)P(=O)(C2=CC=CC=C2)C3=CC=CC=C3OC4=CC=CC=C4P(=O)(C5=CC=CC=C5)C6=CC=CC=C6	437
C1=CC=C(C2=CC(C3=CC=C(N4C5=C(C=CC=C5)C5=C4C=CC4=C5SC5=C4C=CC=C5)C=C3)=NC(C3=CC=CC=C3)=N2)C=C1	C1=CC=C(C=C1)P(=O)(C2=CC=CC=C2)C3=CC=CC=C3OC4=CC=CC=C4P(=O)(C5=CC=CC=C5)C6=CC=CC=C6	439
C1=CC=C(C2=CC(C3=CC=C(N4C5=C(C=CC=C5)C5=C4C=CC4=C5OC5=C4C=CC=C5)C=C3)=NC(C3=CC=CC=C3)=N2)C=C1	C1=CC=C(C=C1)P(=O)(C2=CC=CC=C2)C3=CC=CC=C3OC4=CC=CC=C4P(=O)(C5=CC=CC=C5)C6=CC=CC=C6	441
O=C(C1=CC=C(N2C3=C(C=CC=C3)C3=C2C=CC=C3)C=C1)C1=CC=C(N2C3=C(C=CC=C3)C3=C2C=CC=C3)C=C1	C1=CC=C(C=C1)P(=O)(C2=CC=CC=C2)C3=CC=CC=C3OC4=CC=CC=C4P(=O)(C5=CC=CC=C5)C6=CC=CC=C6	444
CC1=CC(N2C3=C(C=CC=C3)C(C3=CC=CC=C3)(C3=CC=CC=C3)C3=C2C=CC=C3)=CC(C)=C1B1C2=C(C=CC=C2)CC2=C1C=CC=C2	C1=CC=C(C=C1)P(=O)(C2=CC=CC=C2)C3=CC=CC=C3OC4=CC=CC=C4P(=O)(C5=CC=CC=C5)C6=CC=CC=C6	445
F[B-]1(OC2=CC=CC=C2C3=CC(C4=C(C=C(C=C4C)N5C6=C(C7=C5C=CC=C7)C=CC=C6)C)=CC=[N+]31)F	C1=CC=C(C=C1)P(=O)(C2=CC=CC=C2)C3=CC=CC=C3OC4=CC=CC=C4P(=O)(C5=CC=CC=C5)C6=CC=CC=C6	445
CC1=CC(C)=C(B(C2=C(C)C=C(C)C=C2C)C2=C(C)C=C(N3C4=C(C=CC=C4)C(C4=CC=CC=C4)(C4=CC=CC=C4)C4=C3C=CC=C4)C=C2C)C(C)=C1	C1=CC=C(C=C1)P(=O)(C2=CC=CC=C2)C3=CC=CC=C3OC4=CC=CC=C4P(=O)(C5=CC=CC=C5)C6=CC=CC=C6	448
CC(C)(C)C1=CC(B2C3=CC(C(C)(C)C)=CC=C3OC4=C2C5=CC(N6C(C=CC=C7)=C7C8(C9=C(C%10(C%11=C8C=CC=C%11)C%12=C(C%13=C%10C=CC=C%13)C=CC=C%12)C=CC=C9)C%14=CC=CC=C6%14)=C4)=C(O5)C=C1	C1=CC=C(C=C1)P(=O)(C2=CC=CC=C2)C3=CC=CC=C3OC4=CC=CC=C4P(=O)(C5=CC=CC=C5)C6=CC=CC=C6	450
C12=CC=CC=C1OC3=C4B2C5=C(OC4=CC(N6C(C=CC=C7)=C7C8(C9=C(C%10(C%11=C8C=CC=C%11)C%12=C(C%13=C%10C=CC=C%13)C=CC=C%12)C=CC=C9)C%14=CC=CC=C6%14)=C3)C=CC=C5	C1=CC=C(C=C1)P(=O)(C2=CC=CC=C2)C3=CC=CC=C3OC4=CC=CC=C4P(=O)(C5=CC=CC=C5)C6=CC=CC=C6	454
F[B-]1(OC2=CC=CC=C2C3=CC(C4=C(C=C(C=C4C)N5C6=C(C7=C5C=CC(C8=CC=CC=C8)=C7)C=C(C=C6)C9=CC=CC=C9)C)=CC=[N+]31)F	C1=CC=C(C=C1)P(=O)(C2=CC=CC=C2)C3=CC=CC=C3OC4=CC=CC=C4P(=O)(C5=CC=CC=C5)C6=CC=CC=C6	457
CC1(C2=C(N(C3=C1C=CC=C3)C4=CC5=C(S(=O)(C6=CC=CC=C6O5)=O)C=C4)C=CC=C2)C	C1=CC=C(C=C1)P(=O)(C2=CC=CC=C2)C3=CC=CC=C3OC4=CC=CC=C4P(=O)(C5=CC=CC=C5)C6=CC=CC=C6	458
C1=CC2=C(C=C1)N(C1=CC=C3C=CC(N4C5=C(C=CC=C5)C5=C4C=CC=C5)=NC3=N1)C1=C2C=CC=C1	C1=CC=C(C=C1)P(=O)(C2=CC=CC=C2)C3=CC=CC=C3OC4=CC=CC=C4P(=O)(C5=CC=CC=C5)C6=CC=CC=C6	462
CC1=CC(N2C3=C(C=CC=C3)C(C)(C)C3=C2C=CC=C3)=CC(C)=C1B1C2=C(C=CC=C2)CC2=C1C=CC=C2	C1=CC=C(C=C1)P(=O)(C2=CC=CC=C2)C3=CC=CC=C3OC4=CC=CC=C4P(=O)(C5=CC=CC=C5)C6=CC=CC=C6	463
CC1=CC(C)=C(B(C2=C(C)C=C(C)C=C2C)C2=C(C)C=C(N3C4=C(C=CC=C4)C(C)(C)C4=C3C=CC=C4)C=C2C)C(C)=C1	C1=CC=C(C=C1)P(=O)(C2=CC=CC=C2)C3=CC=CC=C3OC4=CC=CC=C4P(=O)(C5=CC=CC=C5)C6=CC=CC=C6	464
CC1=C(C=CC(N2C3=C(C(C)(C4=C2C=CC=C4)C)C=CC=C3)=C1)C5=NN(N=C5C6=CC=C(C=C6C)N7C8=C(C(C)(C9=C7C=CC=C9)C)C=CC=C8)C%10=CC=C(C=C%10)C#N	C1=CC=C(C=C1)P(=O)(C2=CC=CC=C2)C3=CC=CC=C3OC4=CC=CC=C4P(=O)(C5=CC=CC=C5)C6=CC=CC=C6	466
CC(C)(C)C1=CC2=C(C(N3C4=CC=C(C=C4C5=C3C=CC(C(C)(C)C)=C5)C(C)(C)C)=C1)N(C6=NC7=NC(N8C9=C(C=C(C=C9C%10=C8C=CC(C(C)(C)C)=C%10)C(C)(C)C)N%11C%12=CC=C(C=C%12C%13=C%11C=CC(C(C)(C)C)=C%13)C(C)(C)C)=CC=C7C=C6)C%14=C2C=C(C(C)(C)C)C=C%14	C1=CC=C(C=C1)P(=O)(C2=CC=CC=C2)C3=CC=CC=C3OC4=CC=CC=C4P(=O)(C5=CC=CC=C5)C6=CC=CC=C6	468
C1=CC=C(C2=NC(C3=CC=CC=C3)=NC(C3=CC=C(N4C5=CC=CC=C5C5=CC6=C(C=C54)C4(C5=CC=CC=C5C5=CC=CC=C54)C4=CC=CC=C46)C=C3)=N2)C=C1	C1=CC=C(C=C1)P(=O)(C2=CC=CC=C2)C3=CC=CC=C3OC4=CC=CC=C4P(=O)(C5=CC=CC=C5)C6=CC=CC=C6	470
C1=CC=C(C2=NC(C3=CC=CC=C3)=NC(C3=CC=C(N4C5=CC=CC=C5C5=CC6=C(C=C54)C(C4=CC=CC=C4)(C4=CC=CC=C4)C4=CC=CC=C46)C=C3)=N2)C=C1	C1=CC=C(C=C1)P(=O)(C2=CC=CC=C2)C3=CC=CC=C3OC4=CC=CC=C4P(=O)(C5=CC=CC=C5)C6=CC=CC=C6	471
C1(C2=NC(C3=CC=CC=C3)=NC(C4=CC=CC=C4)=N2)=CC(C5=CC=CC=C5)=C(N6C7=CC=C(N8C9=C(C%10=C8C=CC=C%10)C=CC=C9)C=C7C%11=C6C=CC=C%11)C=C1	C1=CC=C(C=C1)P(=O)(C2=CC=CC=C2)C3=CC=CC=C3OC4=CC=CC=C4P(=O)(C5=CC=CC=C5)C6=CC=CC=C6	471
CC(C1=CC2=C(N(C3=C2C=C(C=C3)C(C)(C)C)C4=NC5=NC(N6C7=CC=C(C(C)(C)C)C=C7C8=C6C=CC(C(C)(C)C)=C8)=CC=C5C=C4)C(N9C%10=CC=C(C(C)(C)C)C=C%10C%11=C9C=CC(C(C)(C)C)=C%11)=C1)(C)C	C1=CC=C(C=C1)P(=O)(C2=CC=CC=C2)C3=CC=CC=C3OC4=CC=CC=C4P(=O)(C5=CC=CC=C5)C6=CC=CC=C6	471
CC(C)(C)C1=CC2=C(C=C1)N(C1=CC=C3C=CC(N4C5=C(C=C(C(C)(C)C)C=C5)C5=C4C=CC(C(C)(C)C)=C5)=NC3=N1)C1=C2C=C(C(C)(C)C)C=C1	C1=CC=C(C=C1)P(=O)(C2=CC=CC=C2)C3=CC=CC=C3OC4=CC=CC=C4P(=O)(C5=CC=CC=C5)C6=CC=CC=C6	472
O=C(C1=CC=C(C=C1)N2C3=C(C4=C2C=CC(N5C6=CC=CC=C6C7=C5C=CC=C7)=C4)C=CC=C3)C8=CC=C(C=C8)N9C%10=C(C%11=C9C=CC=C%11)C=C(N%12C%13=CC=CC=C%13C%14=C%12C=CC=C%14)C=C%10	C1=CC=C(C=C1)P(=O)(C2=CC=CC=C2)C3=CC=CC=C3OC4=CC=CC=C4P(=O)(C5=CC=CC=C5)C6=CC=CC=C6	475
C1=CC=C(C2=NC(C3=CC=CC=C3)=NC(C3=CC=C(N4C5=CC=CC=C5C5=C6C(=CC=C54)C4=CC=CC=C4C6(C4=CC=CC=C4)C4=CC=CC=C4)C=C3)=N2)C=C1	C1=CC=C(C=C1)P(=O)(C2=CC=CC=C2)C3=CC=CC=C3OC4=CC=CC=C4P(=O)(C5=CC=CC=C5)C6=CC=CC=C6	475
CC(C)(C)C1=CC2=C(N(C3=C2C=C(C=C3)C(C)(C)C)C4=NC5=NC=CC=C5C=C4)C(N6C7=CC=C(C(C)(C)C)C=C7C8=C6C=CC(C(C)(C)C)=C8)=C1	C1=CC=C(C=C1)P(=O)(C2=CC=CC=C2)C3=CC=CC=C3OC4=CC=CC=C4P(=O)(C5=CC=CC=C5)C6=CC=CC=C6	475
CC1(C2=C(N(C3=C1C=CC=C3)C4=CC=C(C=C4)C5=NN(N=C5C6=CC=C(C=C6)N7C8=C(C(C)(C9=C7C=CC=C9)C)C=CC=C8)C%10=CC=C(C=C%10)C#N)C=CC=C2)C	C1=CC=C(C=C1)P(=O)(C2=CC=CC=C2)C3=CC=CC=C3OC4=CC=CC=C4P(=O)(C5=CC=CC=C5)C6=CC=CC=C6	478
CC1=C(C=CC(N2C3=C(C(C)(C4=C2C=CC(C(C)(C)C)=C4)C)C=C(C=C3)C(C)(C)C)=C1)C5=NN(N=C5C6=CC=C(C=C6C)N7C8=C(C(C)(C9=C7C=CC(C(C)(C)C)=C9)C)C=C(C=C8)C(C)(C)C)C%10=CC=C(C=C%10)C#N	C1=CC=C(C=C1)P(=O)(C2=CC=CC=C2)C3=CC=CC=C3OC4=CC=CC=C4P(=O)(C5=CC=CC=C5)C6=CC=CC=C6	479
CC1=CC(C2=CC=[N+]3C(C4=CC=CC=C4O[B-]3(F)F)=C2)=CC=C1N5C6=C(C=C(C7=CC=CC=C7)C=C6)C8=C5C=CC(C9=CC=CC=C9)=C8	C1=CC=C(C=C1)P(=O)(C2=CC=CC=C2)C3=CC=CC=C3OC4=CC=CC=C4P(=O)(C5=CC=CC=C5)C6=CC=CC=C6	480
CC1(C)C2=CC=CC=C2C2=CC3=C(C=C21)N(C1=CC=C(C2=NC(C4=CC=CC=C4)=NC(C4=CC=CC=C4)=N2)C=C1)C1=CC=CC=C13	C1=CC=C(C=C1)P(=O)(C2=CC=CC=C2)C3=CC=CC=C3OC4=CC=CC=C4P(=O)(C5=CC=CC=C5)C6=CC=CC=C6	488
CC(C)(C1=CC2=C(N(C3=C(C2(C)C)C=C(C=C3)C(C)(C)C)C4=CC=C(C=C4)C5=NN(N=C5C(C=C6)=CC=C6N7C8=C(C(C)(C9=C7C=CC(C(C)(C)C)=C9)C)C=C(C=C8)C(C)(C)C)C%10=CC=C(C=C%10)C#N)C=C1)C	C1=CC=C(C=C1)P(=O)(C2=CC=CC=C2)C3=CC=CC=C3OC4=CC=CC=C4P(=O)(C5=CC=CC=C5)C6=CC=CC=C6	492
N#CC1=C(C2=CC=C(N3C4=C(C=CC=C4)C4=C3C=CC=C4)C=C2)C=CC=C1OC1=CC(C2=CC=C(N3C4=C(C=CC=C4)C4=C3C=CC=C4)C=C2)=CC=C1	C1=CC=C(C=C1)P(=O)(C2=CC=CC=C2)C3=CC4=C(C=C3)OC5=C4C=C(C=C5)P(=O)(C6=CC=CC=C6)C7=CC=CC=C7	408
N#CC1=C(C2=CC=C(N3C4=C(C=CC=C4)C4=C3C=CC=C4)C=C2)C=CC=C1OC1=CC=CC=C1	C1=CC=C(C=C1)P(=O)(C2=CC=CC=C2)C3=CC4=C(C=C3)OC5=C4C=C(C=C5)P(=O)(C6=CC=CC=C6)C7=CC=CC=C7	412
CC(C)C1=CC2=C(C=C1)N(C1=CC=C(C3=C(C#N)C(OC4=CC(C5=CC=C(N6C7=C(C=C(C(C)(C)C)C=C7)C7=C6C=CC(C(C)(C)C)=C7)C=C5)=CC=C4)=CC=C3)C=C1)C1=C2C=C(C(C)(C)C)C=C1	C1=CC=C(C=C1)P(=O)(C2=CC=CC=C2)C3=CC4=C(C=C3)OC5=C4C=C(C=C5)P(=O)(C6=CC=CC=C6)C7=CC=CC=C7	425
CC1=CC2=C(C=C1)N(C1=CC3=C(C=C1)P(=O)(C1=CC=CC=C1)C1=C(C=CC=C1)O3)C1=C(C=C(C)C=C1)C21C2=C(C=CC=C2)C2=C1C=CC=C2	C1=CC=C(C=C1)P(=O)(C2=CC=CC=C2)C3=CC4=C(C=C3)OC5=C4C=C(C=C5)P(=O)(C6=CC=CC=C6)C7=CC=CC=C7	449
CC1=CC2=C(C=C1)N(C1=CC3=C(C=C1)P(=S)(C1=CC=CC=C1)C1=C(C=CC=C1)O3)C1=C(C=C(C)C=C1)C21C2=C(C=CC=C2)C2=C1C=CC=C2	C1=CC=C(C=C1)P(=O)(C2=CC=CC=C2)C3=CC4=C(C=C3)OC5=C4C=C(C=C5)P(=O)(C6=CC=CC=C6)C7=CC=CC=C7	453
CC1=CC2=C(C=C1)N(C1=CC3=C(C=C1)P(=O)(C1=CC=CC=C1)C1=C(C=CC=C1)O3)C1=C(C=C(C)C=C1)C21C2=C(C=CC=C2)C2=C1C=CC=C2	C1=CC=C(C=C1)P(=O)(C2=CC=CC=C2)C3=CC4=C(C=C3)OC5=C4C=C(C=C5)P(=O)(C6=CC=CC=C6)C7=CC=CC=C7	464
CC1=CC2=C(C=C1)N(C1=CC3=C(C=C1)P(=S)(C1=CC=CC=C1)C1=C(C=CC=C1)S3)C1=C(C=C(C)C=C1)C21C2=C(C=CC=C2)C2=C1C=CC=C2	C1=CC=C(C=C1)P(=O)(C2=CC=CC=C2)C3=CC4=C(C=C3)OC5=C4C=C(C=C5)P(=O)(C6=CC=CC=C6)C7=CC=CC=C7	467
CC(C)(C)C1=CC2=C(C=C1)N(C1=CC=C(S(=O)(=O)C3=CC=C(N4C5=C(C=C(C(C)(C)C)C=C5)C5=C4C=CC(C(C)(C)C)=C5)N=C3)C=N1)C1=C2C=C(C(C)(C)C)C=C1	C1=CC=C(C=C1)P(=O)(C2=CC=CC=C2)C3=CC4=C(C=C3)SC5=C4C=C(C=C5)P(=O)(C6=CC=CC=C6)C7=CC=CC=C7	444
C1=CC2=C(C=C1)N(C1=CC(C3=CC(N4C5=C(C=CC=C5)C5=C4C=CC=C5)=NC(N4C5=C(C=CC=C5)C5=C4C=CC=C5)=C3)=CC(N3C4=C(C=CC=C4)C4=C3C=CC=C4)=N1)C1=C2C=CC=C1	C1=CC=C(C=C1)P(=O)(C2=CC=CC=C2)C3=CC4=C(C=C3)SC5=C4C=C(C=C5)P(=O)(C6=CC=CC=C6)C7=CC=CC=C7	461
CC(C)(C)C1=CC2=C(C=C1)N(C1=CC=C(S(=O)(=O)C3=CC=C(N4C5=C(C=C(C(C)(C)C)C=C5)C5=C4C=CC(C(C)(C)C)=C5)C=N3)N=C1)C1=C2C=C(C(C)(C)C)C=C1	C1=CC=C(C=C1)P(=O)(C2=CC=CC=C2)C3=CC4=C(C=C3)SC5=C4C=C(C=C5)P(=O)(C6=CC=CC=C6)C7=CC=CC=C7	467
CC1=CC2=C(C=C1)N(C3=C2C=C(C)C=C3)C4=NC(N5C6=C(C7=C5C=CC(C)=C7)C=C(C)C=C6)=CC(C8=CC(N9C%10=C(C%11=C9C=CC(C)=C%11)C=C(C)C=C%10)=NC(N(C%12=C%13C=C(C)C=C%12)C%14=C%13C=C(C)C=C%14)=C8)=C4	C1=CC=C(C=C1)P(=O)(C2=CC=CC=C2)C3=CC4=C(C=C3)SC5=C4C=C(C=C5)P(=O)(C6=CC=CC=C6)C7=CC=CC=C7	470
C12=C(N(C3=C2C=CC=C3)C4=CC(C5=CC(N6C7=C(C8=C6C=CC=C8)C=CC=C7)=NC(N9C%10=C(C%11=C9C=CC=C%11)C=CC=C%10)=N5)=NC(N%12C%13=C(C%14=C%12C=CC=C%14)C=CC=C%13)=N4)C=CC=C1	C1=CC=C(C=C1)P(=O)(C2=CC=CC=C2)C3=CC4=C(C=C3)SC5=C4C=C(C=C5)P(=O)(C6=CC=CC=C6)C7=CC=CC=C7	490
C1=CC=C(C2=CC(C3=CC=C(N4C5=C(C=CC=C5)C5=C4C=CC4=C5OC5=C4C=CC=C5)C=C3)=NC(C3=CC=CC=C3)=N2)C=C1	C1=CC=C(C2=CC(C3=CC=C(N4C5=C(C=CC=C5)C5=C4C=CC4=C5OC5=C4C=CC=C5)C=C3)=NC(C3=CC=CC=C3)=N2)C=C1	446
C1=CC=C(C2=CC(C3=CC=C(N4C5=C(C=CC=C5)C5=C4C=CC4=C5SC5=C4C=CC=C5)C=C3)=NC(C3=CC=CC=C3)=N2)C=C1	C1=CC=C(C2=CC(C3=CC=C(N4C5=C(C=CC=C5)C5=C4C=CC4=C5SC5=C4C=CC=C5)C=C3)=NC(C3=CC=CC=C3)=N2)C=C1	445
C1=CC=C(C2=NC(C3=CC=CC=C3)=NC(N3C4=C(C=CC=C4)C4=C3C3=C(C=C4)N(C4=CC=CC=C4)C4=C3C=CC=C4)=N2)C=C1	C1=CC=C(C2=NC(C3=CC=CC=C3)=NC(N3C4=C(C=CC=C4)C4=C3C3=C(C=C4)N(C4=CC=CC=C4)C4=C3C=CC=C4)=N2)C=C1	500
C1(C2=NC(C3=CC=CC=C3)=NC(C4=CC=CC=C4)=N2)=CC(C5=CC=CC=C5)=C(N6C7=CC=C(N8C9=C(C%10=C8C=CC=C%10)C=CC=C9)C=C7C%11=C6C=CC=C%11)C=C1	C1=CC=C2C(=C1)C3=CC=CC=C3N2C4=C(C=CC=C4C5=CC6=C(C=C5)OC7=CC=CC=C76)C#N	469
CC(C)C1=CC(N2C3=CC=CC=C3C3(C4=C(C=CC=C4)C4=C3C=CC=C4)C3=C2C=CC=C3)=CC(C(C)C)=C1B1C2=C(C=CC=C2)C2(C3=C1C=CC=C3)C1=C(C=CC=C1)C1=C2C=CC=C1	C1=CC=C2C(=C1)C3=CC=CC=C3N2C4=CC(=CC=C4)N5C6=CC=CC=C6C7=CC=CC=C75	444
CC(C)C1=CC(N2C3=CC=CC=C3C3(C4=C(C=CC=C4)C4=C3C=CC=C4)C3=C2C=CC=C3)=CC(C(C)C)=C1B1C2=C(C=CC=C2)C2(C3=C1C=CC=C3)C1=C(C=CC=C1)C1=C2C=CC=C1	C1=CC=C2C(=C1)C3=CC=CC=C3N2C4=CC(=CC=C4)N5C6=CC=CC=C6C7=CC=CC=C75	449
CC1=CC(C)=CC(C)=C1C2=CC3=C(N4C5=C(C6=C4C3=CC(C7=C(C=C(C=C7C)C)C)=C6)C=C8C(C9=C%10C(C%11=C(N8%10)C=CC(C%12=C(C=C(C=C%12C)C)C)=C%11)=CC(C%13=C(C=C(C=C%13C)C)C)=C9)=C5)C=C2	C1=CC=C2C(=C1)C3=CC=CC=C3N2C4=CC(=CC=C4)N5C6=CC=CC=C6C7=CC=CC=C75	451
C1=CC=C(N(C2=CC=CC=C2)C2=CC3=C4B(C5=CC=CC=C5N3C3=CC=CC=C3)C3=C(C=CC=C3)N(C3=CC=CC=C3)C4=C2)C=C1	C1=CC=C2C(=C1)C3=CC=CC=C3N2C4=CC(=CC=C4)N5C6=CC=CC=C6C7=CC=CC=C75	453
CC(C)(C)C1=CC=C(N2C3=CC(N(C4=CC=CC=C4)C4=CC=CC=C4)=CC4=C3B(C3=CC(C(C)(C)C)=CC=C3N4C3=CC=C(C(C)(C)C)C=C3)C3=C2C=CC(C(C)(C)C)=C3)C=C1	C1=CC=C2C(=C1)C3=CC=CC=C3N2C4=CC(=CC=C4)N5C6=CC=CC=C6C7=CC=CC=C75	457
CC(C)(C)C1=CC=C(N(C2=CC=C(C(C)(C)C)C=C2)C2=CC3=C4B(C5=CC(C(C)(C)C)=CC=C5N3C3=CC=C(C(C)(C)C)C=C3)C3=C(C=CC(C(C)(C)C)=C3)N(C3=CC=C(C(C)(C)C)C=C3)C4=C2)C=C1	C1=CC=C2C(=C1)C3=CC=CC=C3N2C4=CC(=CC=C4)N5C6=CC=CC=C6C7=CC=CC=C75	458
CC1(C)C2=C(C=CC=C2)N(C2=CC=C3B4C5=C(C=CC(C6(C7=CC8=C(C=C7)OC7=CC=CC9=C7B8C7=C(C=C(N8C%10=C(C=CC=C%10)C(C)(C)C%10=C8C=CC=C%10)C=C7)O9)C7=C(C=CC=C7)C7=C6C=CC=C7)=C5)OC5=C4C(=CC=C5)OC3=C2)C2=C1C=CC=C2	C1=CC=C2C(=C1)C3=CC=CC=C3N2C4=CC(=CC=C4)N5C6=CC=CC=C6C7=CC=CC=C75	467
CC(C)(C)C1=CC2=C(C=C1)OC1=C3B2C2=CC=C(N4C5=C(C=CC=C5)C(C)(C)C5=C4C=CC=C5)C=C2OC3=CC=C1	C1=CC=C2C(=C1)C3=CC=CC=C3N2C4=CC(=CC=C4)N5C6=CC=CC=C6C7=CC=CC=C75	468
CC(C)(C1=CC2=C(C=C1)OC1=C3B2C2=CC=C(N4C5=C(C=CC=C5)C(C)(C)C5=C4C=CC=C5)C=C2OC3=CC=C1)C1=CC2=C(C=C1)OC1=CC=CC3=C1B2C1=C(C=C(N2C4=C(C=CC=C4)C(C)(C)C4=C2C=CC=C4)C=C1)O3	C1=CC=C2C(=C1)C3=CC=CC=C3N2C4=CC(=CC=C4)N5C6=CC=CC=C6C7=CC=CC=C75	470
C1(C2=NC(C3=CC=CC=C3)=NC(C4=CC=CC=C4)=N2)=CC(C5=CC=CC=C5)=C(N6C7=CC=C(N8C9=C(C%10=C8C=CC=C%10)C=CC=C9)C=C7C%11=C6C=CC=C%11)C=C1	C1=CC=C2C(=C1)C3=CC=CC=C3N2C4=CC=CC(=C4)C5=CC(=CC(=C5)C#N)N6C7=CC=CC=C7C8=CC=CC=C86	458
C1(C2=NC(C3=CC=CC=C3)=NC(C4=CC=CC=C4)=N2)=CC(C5=CC=CC=C5)=C(N6C7=CC=C(N8C9=C(C%10=C8C=CC=C%10)C=CC=C9)C=C7C%11=C6C=CC=C%11)C=C1	C1=CC=C2C(=C1)C3=CC=CC=C3N2C4=CC=CC(=C4)C5=CC(=CC=C5)N6C7=CC=CC=C7C8=CC=CC=C86	457
CC1=CC=C(C(=O)C2=CC(C3=CC=C(N4C5=C(C=CC=C5)C(C)(C)C5=C4C=CC=C5)C=C3)=C(C(=O)C3=CC=C(C)C=C3)C=C2C2=CC=C(N3C4=C(C=CC=C4)C(C)(C)C4=C3C=CC=C4)C=C2)C=C1	C1=CC=C2C(=C1)C3=CC=CC=C3N2C4=CC=CC(=C4)C5=CC(=CC=C5)N6C7=CC=CC=C7C8=CC=CC=C86	492
N(C1=CC=CC=C1)(C2=CC=CC=C2)C3=CC4=C5B(C6=C(N(C7=CC=CC=C7)C5=C3)C=CC=C6)C8=CC9=C(OC%10=C%11B9C%12=C(N(C%13=CC=CC=C%13)C%11=CC(N(C%14=CC=CC=C%14)C%15=CC=CC=C%15)=C%10)C=CC=C%12)C=C8O4	C1=CC=C2C(=C1)C3=CC=CC=C3N2C4=CC=CC(=C4)C5=CC(=CC=C5)N6C7=CC=CC=C7C8=CC=CC=C86	445
N(C1=CC=CC=C1)(C2=CC3=C4B(C5=CC6=C(C=C5S3)OC7=C8B6C9=C(C=CC=C9)N(C8=CC(N(C%10=CC=CC=C%10)C%11=CC=CC=C%11)=C7)C%12=CC=CC=C%12)C%13=C(C=CC=C%13)N(C4=C2)C%14=CC=CC=C%14)C%15=CC=CC=C%15	C1=CC=C2C(=C1)C3=CC=CC=C3N2C4=CC=CC(=C4)C5=CC(=CC=C5)N6C7=CC=CC=C7C8=CC=CC=C86	457
N(C1=CC=CC=C1)(C2=CC3=C4B(C5=CC6=C(C=C5S3)SC7=C8B6C9=C(C=CC=C9)N(C8=CC(N(C%10=CC=CC=C%10)C%11=CC=CC=C%11)=C7)C%12=CC=CC=C%12)C%13=C(C=CC=C%13)N(C4=C2)C%14=CC=CC=C%14)C%15=CC=CC=C%15	C1=CC=C2C(=C1)C3=CC=CC=C3N2C4=CC=CC(=C4)C5=CC(=CC=C5)N6C7=CC=CC=C7C8=CC=CC=C86	464
CC(C)(C)C1=CC2=C(C=C1)SC1=C3B2C2=C(C=CC(C(C)(C)C)=C2)N2C4=C(C=C(C(C)(C)C)C=C4)B4C5=C(C=CC(C(C)(C)C)=C5)SC(=C1)C4=C32	C1=CC=C2C(=C1)C3=CC=CC=C3N2C4=CC=CC(=C4)C5=CC(=CC=C5)N6C7=CC=CC=C7C8=CC=CC=C86	478
N#CC1=NC2=C(N=C1C#N)C1=C(C=C(N3C4=C(C=CC=C4)C4(C5=C(C=CC=C5)C5=C4C=CC=C5)C4=C3C=CC=C4)C=C1)C1=CC(N3C4=C(C=CC=C4)C4(C5=C(C=CC=C5)C5=C4C=CC=C5)C4=C3C=CC=C4)=CC=C12	C1=CC=C2C(=C1)C3=CC=CC=C3N2C4=CC=CC(=C4)C5=CC(=CC=C5)N6C7=CC=CC=C7C8=CC=CC=C86	490
N#CC1=CC=C2C(C3=C(C4=C2NC5C=C(F)C(N6C7=C(C8(C9=C6C=CC=C9)C%10=C(C%11=C8C=CC=C%11)C=CC=C%10)C=CC=C7)=CC5=N4)C=CC(C#N)=C3)=C1	C1=CC=C2C(=C1)C3=CC=CC=C3N2C4=CC=CC(=C4)C5=CC(=CC=C5)N6C7=CC=CC=C7C8=CC=CC=C86	504
C12=C([Si]3(C4=C(N(C5=C3C=CC=C5)C6=CC7=C(C8=NC9=C(N=C8C=C7)C=CC%10=C9C=CC(N%11C%12=C([Si]%13(C%14=C%11C=CC=C%14)C%15=C(OC%16=C%13C=CC=C%16)C=CC=C%15)C=CC=C%12)=C%10)C=C6)C=CC=C4)C%17=C(O2)C=CC=C%17)C=CC=C1	C1=CC=C2C(=C1)C3=CC=CC=C3N2C4=CC=CC(=C4)C5=CC(=CC=C5)N6C7=CC=CC=C7C8=CC=CC=C86	505
C1(C2=NC(C3=CC=CC=C3)=NC(C4=CC=CC=C4)=N2)=CC(C5=CC=CC=C5)=C(N6C7=CC=C(N8C9=C(C%10=C8C=CC=C%10)C=CC=C9)C=C7C%11=C6C=CC=C%11)C=C1	C1=CC=C2C(=C1)C3=CC=CC=C3N2C4=CC=CC(=C4)C5=CC=CC(=C5N6C7=CC=CC=C7C8=CC=CC=C86)C#N	467
O=S(=O)(C1=CC=C(N2C3=C(C=CC=C3)C3=C2C=CC=C3)C=C1)C1=NC=CC=C1	C1CCCCC1	366
O=S(=O)(C1=CC=CC=C1)C1=CC=C(N2C3=C(C=CC=C3)C3=C2C=CC=C3)C=N1	C1CCCCC1	389
O=S(=O)(C1=CC=C(N2C3=C(C=CC=C3)C3=C2C=CC=C3)C=C1)C1=CC=C(N2C3=C(C=CC=C3)C3=C2C=CC=C3)C=N1	C1CCCCC1	392
O=S(=O)(C1=CC=C(N2C3=C(C=CC=C3)C3=C2C=CC=C3)C=C1)C1=CN=CC(N2C3=C(C=CC=C3)C3=C2C=CC=C3)=C1	C1CCCCC1	396
O=S(=O)(C1=CC=C(N2C3=C(C=CC=C3)C3=C2C=CC=C3)C=C1)C1=CC=CC(N2C3=C(C=CC=C3)C3=C2C=CC=C3)=N1	C1CCCCC1	398
N#CC1=CC=C(C=C1)N2C3=C(C4(C5=C2C=CC=C5)C6=C(N(C7=C4C=CC=C7)C8=CC=C(C#N)C=C8)C=CC=C6)C=CC=C3	C1CCCCC1	407
CC1(C)C(C=CC=C2)=C2N(C3=CC=C(C#N)C=C3)C4=C1C=CC=C4	C1CCCCC1	411
O=S(=O)(C1=CC=C(N2C3=C(C=CC=C3)C3=C2C=CC=C3)C=C1)C1=CC=NC(N2C3=C(C=CC=C3)C3=C2C=CC=C3)=C1	C1CCCCC1	419
O=S(=O)(C1=CC=NC(N2C3=C(C=CC=C3)C3=C2C=CC=C3)=C1)C1=CC(N2C3=C(C=CC=C3)C3=C2C=CC=C3)=CC=C1	C1CCCCC1	430
C1=CC=C(N(C2=CC=CC=C2)C2=CC3=C4B(C5=CC=CC=C5N3C3=CC=CC=C3)C3=C(C=CC=C3)N(C3=CC=CC=C3)C4=C2)C=C1	C1CCCCC1	438
CC1=CC(C)=C(C(C)=C1)B(C2=C(C=C(C=C2C)C)C)C3=CC(N4C5=C(C6(C7=C4C=CC=C7)C8=C(C9=C6C=CC=C9)C=CC=C8)C=CC=C5)=CC(C(C)(C)C)=C3	C1CCCCC1	444
CC(C)(C)C1=CC=C(N2C3=CC(N(C4=CC=CC=C4)C4=CC=CC=C4)=CC4=C3B(C3=CC(C(C)(C)C)=CC=C3N4C3=CC=C(C(C)(C)C)C=C3)C3=C2C=CC(C(C)(C)C)=C3)C=C1	C1CCCCC1	447
CC(C)(C)C1=CC=C(N(C2=CC=C(C(C)(C)C)C=C2)C2=CC3=C4B(C5=CC(C(C)(C)C)=CC=C5N3C3=CC=C(C(C)(C)C)C=C3)C3=C(C=CC(C(C)(C)C)=C3)N(C3=CC=C(C(C)(C)C)C=C3)C4=C2)C=C1	C1CCCCC1	449
CC1=CC(C)=C(C(C)=C1)B(C2=C(C=C(C=C2C)C)C)C3=CC(N4C5=C(C(C)(C6=C4C=CC=C6)C)C=CC=C5)=CC(C(C)(C)C)=C3	C1CCCCC1	452
CC1=CC(C)=C(B(C2=CC(N3C4=C(C=CC=C4)OC4=C3C=CC=C4)=CC(C(C)(C)C)=C2)C2=C(C)C=C(C)C=C2C)C(C)=C1	C1CCCCC1	488
CC1=CC(C)=C(C(C)=C1)B(C2=C(C)C=C(C=C2C)C)C3=CC(N4C5=CC=CC=C5SC6=C4C=CC=C6)=CC(C(C)(C)C)=C3	C1CCCCC1	504
CC1(C)C2=C(C=CC=C2)N(C2=CC(C(F)(F)F)=C(C3=C(C(F)(F)F)C=C(N4C5=C(C=CC=C5)C(C)(C)C5=C4C=CC=C5)C=C3)C=C2)C2=C1C=CC=C2	C1CCOC1	388
C1=CC=C(NC2=CC=C3C=CC=CC3=C2C2=C(NC3=CC=CC=C3)C=CC3=CC=CC=C32)C=C1	C1CCOC1	417
C12=CC=CC=C1C(C=C3C=CC=CC3=C4C5=C6NC7=CC=CC=C7C6=CC8=CC=CC=C85)=C4N2	C1CCOC1	421
CC(C)(C1=CC2=C(N(C3=C2C=C(C=C3)C(C)(C)C)C4=CC(C(F)(F)F)=C(C=C4)C5=C(C=C(C=C5)N6C7=C(C8=C6C=CC(C(C)(C)C)=C8)C=C(C=C7)C(C)(C)C)C(F)(F)F)C=C1)C	C1CCOC1	428
CC(C)(C)C1=CC2=C(C=C1)N(C1=CC=C(C3=C4C=CC=CC4=C(C4=CC=C(C5=NC6=C(C7=C(C=CC=C7)C7=C6C=CC=C7)N5C5=CC=C(C#N)C=C5)C=C4)C4=C3C=CC=C4)C=C1)C1=C2C=C(C(C)(C)C)C=C1	C1CCOC1	438
C1=CC=C(N2C3=CC=CC=C3C3=C2C=C2OC4=CC=CC=C4B4C5=C(C=CC=C5)OC3=C42)C=C1	C1CCOC1	446
N#CC1=CC(C#N)=C(N2C3=C(C=CC=C3)C3=C2C=CC=C3)C=C1N1C2=C(C=CC=C2)C2=C1C=CC=C2	C1CCOC1	447
N#CC1=CC=C(C=C1)N2C3=C(C4(C5=C2C=CC=C5)C6=C(N(C7=C4C=CC=C7)C8=CC=C(C#N)C=C8)C=CC=C6)C=CC=C3	C1CCOC1	453
O=C(C1=CC=C(N(C2=CC=CC=C2)C2=CC=CC3=C2C=CC=C3)C=C1)C1=CC=C(N(C2=CC=CC=C2)C2=CC=CC3=C2C=CC=C3)C=C1	C1CCOC1	456
FC(F)(C1=C(C=CC(N2C3=C(SC4=C2C=CC=C4)C=CC=C3)=C1)C5=C(C=C(C=C5)N6C7=C(SC8=C6C=CC=C8)C=CC=C7)C(F)(F)F)F	C1CCOC1	463
CC1(C)C(C=CC=C2)=C2N(C3=CC=C(C#N)C=C3)C4=C1C=CC=C4	C1CCOC1	468
O=C(C1=CC=CC=C1)C1=CC=C(N(C2=CC=CC=C2)C2=CC=C3C=CC=CC3=C2C2=C3C=CC=CC3=CC=C2N(C2=CC=CC=C2)C2=CC=C(C(=O)C3=CC=CC=C3)C=C2)C=C1	C1CCOC1	471
N#CC1=C(C2=C(C#N)C(N3C4=C(C=CC=C4)C4=C3C=CC=C4)=CC(N3C4=C(C=CC=C4)C4=C3C=CC=C4)=C2C#N)C(C#N)=C(N2C3=C(C=CC=C3)C3=C2C=CC=C3)C=C1N1C2=C(C=CC=C2)C2=C1C=CC=C2	C1CCOC1	477
O=C(C1=CC=C(N(C2=CC=CC=C2)C2=CC3=C(C=CC=C3)C=C2)C=C1)C1=CC=C(N(C2=CC=CC=C2)C2=CC3=C(C=CC=C3)C=C2)C=C1	C1CCOC1	482
CC1(C)C2=C(C=CC=C2)N(C2=CC=C(S(=O)(=O)C3=CC(N4C5=C(C=CC=C5)C5=C4C=CC=C5)=CC(N4C5=C(C=CC=C5)C5=C4C=CC=C5)=C3)C=C2)C2=C1C=CC=C2	C1CCOC1	496
O=C(C1=CC=CC=C1O2)C(C=C3N4C5=C(C6=C4C=CC(C(C)(C)C)=C6)C=C(C(C)(C)C)C=C5)=C2C=C3N(C7=C8C=C(OC)C=C7)C9=C8C=CC=C9	C1CCOC1	502
O=C(C1=CC=CC=C1)C1=CC=C(N2C3=C(C=CC=C3)C3=C2C(C2=C4C=CC=CC4=CC4=C2N(C2=CC=C(C(=O)C5=CC=CC=C5)C=C2)C2=C4C=CC=C2)=C2C=CC=CC2=C3)C=C1	C1CCOC1	503
O=S(=O)(C1=CC=C(N2C3=C(C=CC=C3)C3=C2C=CC=C3)C=C1)C1=NC=CC=C1	CC#N	465
O=S(=O)(C1=CC=C(N2C3=C(C=CC=C3)C3=C2C=CC=C3)C=C1)C1=CC=CC(N2C3=C(C=CC=C3)C3=C2C=CC=C3)=N1	CC#N	487
O=S(=O)(C1=CC=C(N2C3=C(C=CC=C3)C3=C2C=CC=C3)C=C1)C1=CC=C(N2C3=C(C=CC=C3)C3=C2C=CC=C3)C=N1	CC#N	489
O=S(=O)(C1=CC=CC=C1)C1=CC=C(N2C3=C(C=CC=C3)C3=C2C=CC=C3)C=N1	CC#N	490
O=S(=O)(C1=CC=C(N2C3=C(C=CC=C3)C3=C2C=CC=C3)C=C1)C1=CN=CC(N2C3=C(C=CC=C3)C3=C2C=CC=C3)=C1	CC#N	490
N#CC1=CC=C(C=C1)N2C3=C(C4(C5=C2C=CC=C5)C6=C(N(C7=C4C=CC=C7)C8=CC=C(C#N)C=C8)C=CC=C6)C=CC=C3	CC#N	493
CC(C)(C)C1=CC=C(C2=CC3=C(C=C2)N(C2=CC4=C5B(C6=C(C=CC(C(C)(C)C)=C6)OC5=C2)C2=C(C=CC(C(C)(C)C)=C2)O4)C2=C3C=C(C3=CC=C(C(C)(C)C)C=C3)C=C2)C=C1	CC(C)(C)C1=CC=C(C2=CC3=C(C=C2)N(C2=CC4=C5B(C6=C(C=CC(C(C)(C)C)=C6)OC5=C2)C2=C(C=CC(C(C)(C)C)=C2)O4)C2=C3C=C(C3=CC=C(C(C)(C)C)C=C3)C=C2)C=C1	445
CC(C)(C)C1=CC=C2OC3=C4B(C2=C1)C1=C(C=CC(C(C)(C)C)=C1)OC4=CC(C1=C(N2C4=C(C=CC=C4)C4=C2C=CC=C4)C=C(N2C4=C(C=CC=C4)C4=C2C=CC=C4)C=C1)C3	CC(C)(C)C1=CC=C2OC3=C4B(C2=C1)C1=C(C=CC(C(C)(C)C)=C1)OC4=CC(C1=C(N2C4=C(C=CC=C4)C4=C2C=CC=C4)C=C(N2C4=C(C=CC=C4)C4=C2C=CC=C4)C=C1)C3	414
CC(C)(C)C1=CC2=C(C=C1)N(C1=CC=C(C3=C4C=CC=CC4=C(C4=CC=C(C5=NC6=C(C7=C(C=CC=C7)C7=C6C=CC=C7)N5C5=CC=C(C#N)C=C5)C=C4)C4=C3C=CC=C4)C=C1)C1=C2C=C(C(C)(C)C)C=C1	CC(C)(C)C1=CC2=C(C=C1)N(C1=CC=C(C3=C4C=CC=CC4=C(C4=CC=C(C5=NC6=C(C7=C(C=CC=C7)C7=C6C=CC=C7)N5C5=CC=C(C#N)C=C5)C=C4)C4=C3C=CC=C4)C=C1)C1=C2C=C(C(C)(C)C)C=C1	454
CC(C)(C)C1=CC2=C(C=C1)N(C1=CC=C(S(=O)(=O)C3=CC=C(S(=O)(=O)C4=CC=C(N5C6=C(C=C(C(C)(C)C)C=C6)C6=C5C=CC(C(C)(C)C)=C6)C=C4)C=C3)C=C1)C1=C2C=C(C(C)(C)C)C=C1	CC(C)(C)C1=CC2=C(C=C1)N(C1=CC=C(S(=O)(=O)C3=CC=C(S(=O)(=O)C4=CC=C(N5C6=C(C=C(C(C)(C)C)C=C6)C6=C5C=CC(C(C)(C)C)=C6)C=C4)C=C3)C=C1)C1=C2C=C(C(C)(C)C)C=C1	474
CC(C)(C)C1=CC2=C(C=C1)N(C1=CC=C(S(=O)(=O)C3=CC=CC(S(=O)(=O)C4=CC=C(N5C6=C(C=C(C(C)(C)C)C=C6)C6=C5C=CC(C(C)(C)C)=C6)C=C4)=C3)C=C1)C1=C2C=C(C(C)(C)C)C=C1	CC(C)(C)C1=CC2=C(C=C1)N(C1=CC=C(S(=O)(=O)C3=CC=CC(S(=O)(=O)C4=CC=C(N5C6=C(C=C(C(C)(C)C)C=C6)C6=C5C=CC(C(C)(C)C)=C6)C=C4)=C3)C=C1)C1=C2C=C(C(C)(C)C)C=C1	444
CC(C)(C)C1=CC2=C(C=C1)OC1=CC(CN3C4=C(C=C(N(C5=CC=CC=C5)C5=CC=CC=C5)C=C4)C4=C3C=CC(N(C3=CC=CC=C3)C3=CC=CC=C3)=C4)=CC3=C1B2C1=C(C=CC(C(C)(C)C)=C1)O3	CC(C)(C)C1=CC2=C(C=C1)OC1=CC(CN3C4=C(C=C(N(C5=CC=CC=C5)C5=CC=CC=C5)C=C4)C4=C3C=CC(N(C3=CC=CC=C3)C3=CC=CC=C3)=C4)=CC3=C1B2C1=C(C=CC(C(C)(C)C)=C1)O3	494
CC(C)(C)C1=CC2=C(C=C1)OC1=CC(N3C4=C(C=C(C5=CC=C6C(=C5)C5=C(C=CC=C5)N6C5=CC=CC=C5)C=C4)C4=C3C=CC(C3=CC5=C(C=C3)N(C3=CC=CC=C3)C3=C5C=CC=C3)=C4)=CC3=C1B2C1=C(C=CC(C(C)(C)C)=C1)O3	CC(C)(C)C1=CC2=C(C=C1)OC1=CC(N3C4=C(C=C(C5=CC=C6C(=C5)C5=C(C=CC=C5)N6C5=CC=CC=C5)C=C4)C4=C3C=CC(C3=CC5=C(C=C3)N(C3=CC=CC=C3)C3=C5C=CC=C3)=C4)=CC3=C1B2C1=C(C=CC(C(C)(C)C)=C1)O3	460
CC(C)(C)C1=CC2=C(C=C1)OC1=CC(N3C4=C(C=C(N5C6=C(C=CC=C6)C6=C5C=CC=C6)C=C4)C4=C3C=CC(N3C5=C(C=CC=C5)C5C=CC=CC53)=C4)=CC3=C1B2C1=C(C=CC(C(C)(C)C)=C1)O3	CC(C)(C)C1=CC2=C(C=C1)OC1=CC(N3C4=C(C=C(N5C6=C(C=CC=C6)C6=C5C=CC=C6)C=C4)C4=C3C=CC(N3C5=C(C=CC=C5)C5C=CC=CC53)=C4)=CC3=C1B2C1=C(C=CC(C(C)(C)C)=C1)O3	433
CC(C)(C1=CC=C2OC3=C4B(C5=C(OC4=CC(C3)C6=CC=C(C=C6N7C8=C(C9=C7C=CC=C9)C(C%10=C%11C=CC=C%10)=C(C%11(C)C)C=C8)N%12C%13=C(C%14=C%12C=CC=C%14)C=C(C%15=C(C%16(C)C)C=CC=C%15)C%16=C%13)C=CC(C(C)(C)C)=C5)C2=C1)C	CC(C)(C1=CC=C2OC3=C4B(C5=C(OC4=CC(C3)C6=CC=C(C=C6N7C8=C(C9=C7C=CC=C9)C(C%10=C%11C=CC=C%10)=C(C%11(C)C)C=C8)N%12C%13=C(C%14=C%12C=CC=C%14)C=C(C%15=C(C%16(C)C)C=CC=C%15)C%16=C%13)C=CC(C(C)(C)C)=C5)C2=C1)C	431
CC(C)(C1=CC=C2OC3=C4B(C5=C(OC4=CC(C3)C6=CC=C(C=C6N7C8=C(C9=C7C=CC=C9)C(OC%10=C%11C=CC=C%10)=C%11C=C8)N%12C%13=C(C%14=C%12C=CC=C%14)C(O%15)=C(C%16=C%15C=CC=C%16)C=C%13)C=CC(C(C)(C)C)=C5)C2=C1)C	CC(C)(C1=CC=C2OC3=C4B(C5=C(OC4=CC(C3)C6=CC=C(C=C6N7C8=C(C9=C7C=CC=C9)C(OC%10=C%11C=CC=C%10)=C%11C=C8)N%12C%13=C(C%14=C%12C=CC=C%14)C(O%15)=C(C%16=C%15C=CC=C%16)C=C%13)C=CC(C(C)(C)C)=C5)C2=C1)C	423
CC(C)(C1=CC2=C(OC3=CC(N4C5=C(C6=C4C=CC(C(C)(C)C)=C6)C=C(C=C5)C(C)(C)C)=CC7=C3B2C8=C(O7)C=CC(C(C)(C)C)=C8)C=C1)C	CC(C)(C1=CC2=C(OC3=CC(N4C5=C(C6=C4C=CC(C(C)(C)C)=C6)C=C(C=C5)C(C)(C)C)=CC7=C3B2C8=C(O7)C=CC(C(C)(C)C)=C8)C=C1)C	433
CC(C)(C1=CC2=C(OC3=CC(N4C5=C(C6=C4C=CC(C(C)(C)C)=C6)C=C(C=C5)C(C)(C)C)=CC7=C3B2C8=C(O7)C=CC(C(C)(C)C)=C8)C=C1)C	CC(C)(C1=CC2=C(OC3=CC(N4C5=C(C6=C4C=CC(C(C)(C)C)=C6)C=C(C=C5)C(C)(C)C)=CC7=C3B2C8=C(O7)C=CC(C(C)(C)C)=C8)C=C1)C	433
CC(C)(C1=CC2=C(OC3=CC(N4C5=C(C6=C4C=CC(C7=CC=C(C(C)(C)C)C=C7)=C6)C=C(C8=CC=C(C(C)(C)C)C=C8)C=C5)=CC9=C3B2C%10=C(O9)C=CC(C(C)(C)C)=C%10)C=C1)C	CC(C)(C1=CC2=C(OC3=CC(N4C5=C(C6=C4C=CC(C7=CC=C(C(C)(C)C)C=C7)=C6)C=C(C8=CC=C(C(C)(C)C)C=C8)C=C5)=CC9=C3B2C%10=C(O9)C=CC(C(C)(C)C)=C%10)C=C1)C	445
CC(C)C1=CC(N2C3=CC=CC=C3C3(C4=C(C=CC=C4)C4=C3C=CC=C4)C3=C2C=CC=C3)=CC(C(C)C)=C1B1C2=C(C=CC=C2)C2(C3=C1C=CC=C3)C1=C(C=CC=C1)C1=C2C=CC=C1	CC(C)C1=CC(N2C3=CC=CC=C3C3(C4=C(C=CC=C4)C4=C3C=CC=C4)C3=C2C=CC=C3)=CC(C(C)C)=C1B1C2=C(C=CC=C2)C2(C3=C1C=CC=C3)C1=C(C=CC=C1)C1=C2C=CC=C1	448
CC(C)C1=CC2=C(C=C1)N(C1=CC=C(C3=C(C#N)C(OC4=CC(C5=CC=C(N6C7=C(C=C(C(C)(C)C)C=C7)C7=C6C=CC(C(C)(C)C)=C7)C=C5)=CC=C4)=CC=C3)C=C1)C1=C2C=C(C(C)(C)C)C=C1	CC(C)C1=CC2=C(C=C1)N(C1=CC=C(C3=C(C#N)C(OC4=CC(C5=CC=C(N6C7=C(C=C(C(C)(C)C)C=C7)C7=C6C=CC(C(C)(C)C)=C7)C=C5)=CC=C4)=CC=C3)C=C1)C1=C2C=C(C(C)(C)C)C=C1	427
CC1(C)C2=C(C=CC=C2)N(C2=CC3=C(C=C2)C2=C(C=C(N4C5=C(C=CC=C5)C(C)(C)C5=C4C=CC=C5)C=C2)C32C3=CC=CC=C3S(=O)(=O)C3=C2C=CC=C3)C2=C1C=CC=C2	CC1(C)C2=C(C=CC=C2)N(C2=CC3=C(C=C2)C2=C(C=C(N4C5=C(C=CC=C5)C(C)(C)C5=C4C=CC=C5)C=C2)C32C3=CC=CC=C3S(=O)(=O)C3=C2C=CC=C3)C2=C1C=CC=C2	445
CC1(C)C2=C(C=CC=C2)N(C2=CC3=C(C=C2)S(=O)(=O)C2=CC=CC=C2N3C2=CC=CC=C2)C2=C1C=CC=C2	CC1(C)C2=C(C=CC=C2)N(C2=CC3=C(C=C2)S(=O)(=O)C2=CC=CC=C2N3C2=CC=CC=C2)C2=C1C=CC=C2	452
CC1(C)C2=C(C3=C(C=C2)N(C2=CC=CC=C2)C2=C3C=CC=C2)N(C2=NC(C3C=CC=CC3)=NC(C3=CC=CC=C3)N2)C2=C1CCC=C2	CC1(C)C2=C(C3=C(C=C2)N(C2=CC=CC=C2)C2=C3C=CC=C2)N(C2=NC(C3C=CC=CC3)=NC(C3=CC=CC=C3)N2)C2=C1CCC=C2	470
CC1(C2=C(N(C3=C1C=C(N(C4=C(C5=C6)C=C(C=C4)N7C8=CC=C(C=C8C9=C7C=CC(C(C)(C)C)=C9)C(C)(C)C)C5=CC=C6N%10C(C=CC(C(C)(C)C)=C%11)=C%11C%12=CC(C(C)(C)C)=CC=C%12%10)C=C3)C%13=CC=C(C=C%13)S(=O)(C%14=CC=C(C=C%14)N%15C%16=C(C(C)(C%17=C%15C=CC(N(C%18=C(C%19=C%20)C=C(C=C%18)N%21C%22=CC=C(C=C%22C%23=C%21C=CC(C(C)(C)C)=C%23)C(C)(C)C)C%19=CC=C%20N%24C(C=CC(C(C)(C)C)=C%25)=C%25C%26=CC(C(C)(C)C)=CC=C%26%24)=C%17)C)…	CC1(C2=C(N(C3=C1C=C(N(C4=C(C5=C6)C=C(C=C4)N7C8=CC=C(C=C8C9=C7C=CC(C(C)(C)C)=C9)C(C)(C)C)C5=CC=C6N%10C(C=CC(C(C)(C)C)=C%11)=C%11C%12=CC(C(C)(C)C)=CC=C%12%10)C=C3)C%13=CC=C(C=C%13)S(=O)(C%14=CC=C(C=C%14)N%15C%16=C(C(C)(C%17=C%15C=CC(N(C%18=C(C%19=C%20)C=C(C=C%18)N%21C%22=CC=C(C=C%22C%23=C%21C=CC(C(C)(C)C)=C%23)C(C)(C)C)C%19=CC=C%20N%24C(C=CC(C(C)(C)C)=C%25)=C%25C%26=CC(C(C)(C)C)=CC=C%26%24)=C%17)C)…	464
CC1(C2=C(N(C3=C1C=C(N4C5=CC=C(C=C5C6=C4C=CC(C(C)(C)C)=C6)C(C)(C)C)C=C3)C7=CC=C(C=C7)S(=O)(C8=CC=C(C=C8)N9C%10=C(C(C)(C%11=C9C=CC(N%12C%13=CC=C(C=C%13C%14=C%12C=CC(C(C)(C)C)=C%14)C(C)(C)C)=C%11)C)C=C(N%15C%16=CC=C(C=C%16C%17=C%15C=CC(C(C)(C)C)=C%17)C(C)(C)C)C=C%10)=O)C=CC(N%18C%19=CC=C(C=C%19C%20=C%18C=CC(C(C)(C)C)=C%20)C(C)(C)C)=C2)C	CC1(C2=C(N(C3=C1C=C(N4C5=CC=C(C=C5C6=C4C=CC(C(C)(C)C)=C6)C(C)(C)C)C=C3)C7=CC=C(C=C7)S(=O)(C8=CC=C(C=C8)N9C%10=C(C(C)(C%11=C9C=CC(N%12C%13=CC=C(C=C%13C%14=C%12C=CC(C(C)(C)C)=C%14)C(C)(C)C)=C%11)C)C=C(N%15C%16=CC=C(C=C%16C%17=C%15C=CC(C(C)(C)C)=C%17)C(C)(C)C)C=C%10)=O)C=CC(N%18C%19=CC=C(C=C%19C%20=C%18C=CC(C(C)(C)C)=C%20)C(C)(C)C)=C2)C	492
C1=CC2=C(C=C1)N(C1=CC(N3C4=C(C=CC=C4)C4=C3C=CC=C4)=NC=N1)C1=C2C=CC=C1	CC1=CC=CC=C1	380
CC1(C)C2=C(C=CC(N3C4=C(C=CC=C4)C4=C3C=CC=C4)=C2)S(=O)(=O)C2=C1C=C(N1C3=C(C=CC=C3)C3=C1C=CC=C3)C=C2	CC1=CC=CC=C1	381
CC1(C)C2=C(C=CC=C2)N(C2=CC(C(F)(F)F)=C(C3=C(C(F)(F)F)C=C(N4C5=C(C=CC=C5)C(C)(C)C5=C4C=CC=C5)C=C3)C=C2)C2=C1C=CC=C2	CC1=CC=CC=C1	384
FC(F)(F)C1=CC(C2=CC=C(N3C4=C(C=CC=C4)C4=C3C=CC=C4)C=C2)=CC(C(F)(F)F)=C1	CC1=CC=CC=C1	387
O=S(C1=CC=CC(C2=CC3=C(N(C4=C3C=CC=C4)C5=CC=CC=C5)C=C2)=C1)(C6=CC=CC=C6)=O	CC1=CC=CC=C1	388
C1=CC=C(C2=CC3=C(C=C2)N(C2=CC(N4C5=C(C=C(C6=CC=CC=C6)C=C5)C5=C4C=CC(C4=CC=CC=C4)=C5)=NC=N2)C2=C3C=C(C3=CC=CC=C3)C=C2)C=C1	CC1=CC=CC=C1	392
N#CC1=C(C2=CC(N3C4=C(C=CC=C4)C4=C3C=CC=C4)=CC=C2)C(C2=CC=CC(N3C4=C(C=CC=C4)C4=C3C=CC=C4)=C2)=CC=C1	CC1=CC=CC=C1	395
CC1(C)C2=C(C=CC(N3C4=C(C=C(C5=CC=CC=C5)C=C4)C4=C3C=CC(C3=CC=CC=C3)=C4)=C2)S(=O)(=O)C2=C1C=C(N1C3=C(C=C(C4=CC=CC=C4)C=C3)C3=C1C=CC(C1=CC=CC=C1)=C3)C=C2	CC1=CC=CC=C1	395
N#CC1=CC=C(N2C3=C(C=CC=C3)C3=C2C=CC=C3)C=C1C1=CC(C2=C(C#N)C=CC(N3C4=C(C=CC=C4)C4=C3C=CC=C4)=C2)=CC=C1	CC1=CC=CC=C1	395
CC(C)(C1=CC2=C(N(C3=C2C=C(C=C3)C(C)(C)C)C4=CC(C(F)(F)F)=C(C=C4)C5=C(C=C(C=C5)N6C7=C(C8=C6C=CC(C(C)(C)C)=C8)C=C(C=C7)C(C)(C)C)C(F)(F)F)C=C1)C	CC1=CC=CC=C1	398
N#CC1=C(C2=CC=C(N3C4=C(C=CC=C4)C4=C3C=CC=C4)C=C2)C=CC=C1OC1=CC=CC=C1	CC1=CC=CC=C1	399
CC1=CC=C(S(=O)(=O)C2=CC(N3C4=C(C=CC=C4)C4=C3C=CC=C4)=CC(N3C4=C(C=CC=C4)C4=C3C=CC=C4)=C2)C=C1	CC1=CC=CC=C1	400
C1=CC2=C(C=C1)N(C1=CC3=C(C=C1)N(C1=CC4=C5C(=C1)C1=C(C=CC=C1)N5C1=C4C=CC=C1)C1=C3C=CC=C1)C1=C2C=CC=C1	CC1=CC=CC=C1	400
N#CC1=C(C2=CC=C(N3C4=C(C=CC=C4)C4=C3C=CC=C4)C=C2)C=CC=C1OC1=CC(C2=CC=C(N3C4=C(C=CC=C4)C4=C3C=CC=C4)C=C2)=CC=C1	CC1=CC=CC=C1	400
O=S(=O)(C1=CC=C(N(C2=CC=CC=C2)C2=CC=CC=C2)C=C1)C1=CC=C(N(C2=CC=CC=C2)C2=CC=CC=C2)C=C1	CC1=CC=CC=C1	402
N#CC1=C(N2C3=C(C=CC=C3)C3=C2C=CC=C3)C=CC=C1N1C2=C(C=CC=C2)C2=C1C=CC=C2	CC1=CC=CC=C1	403
CC(C)(C1=CC2=C(N(C3=C2C=C(C=C3)C(C)(C)C)C4=CC=C(C=C4)S(=O)(C5=CC=C(C=C5)N6C7=C(C8=C6C=CC(C(C)(C)C)=C8)C=C(C=C7)C(C)(C)C)=O)C=C1)C	CC1=CC=CC=C1	404
CC(C)(C)C1=CC=C2C(=C1)C1=C(C=CC(C(C)(C)C)=C1)N2C1=CC=C(S(=O)(=O)C2=CC=C(N3C4=CC=C(C(C)(C)C)C=C4C4=C3C=CC(C(C)(C)C)=C4)C=C2)C=C1	CC1=CC=CC=C1	404
CC(C)(C)C1=CC=C2OC3=C4B(C2=C1)C1=C(C=CC(C(C)(C)C)=C1)OC4=CC(C1=C(N2C4=C(C=CC=C4)C4=C2C=CC=C4)C=C(N2C4=C(C=CC=C4)C4=C2C=CC=C4)C=C1)C3	CC1=CC=CC=C1	405
CC(C)(C1=CC=C2OC3=C4B(C5=C(OC4=CC(C3)C6=CC=C(C=C6N7C8=C(C9=C7C=CC=C9)C(OC%10=C%11C=CC=C%10)=C%11C=C8)N%12C%13=C(C%14=C%12C=CC=C%14)C(O%15)=C(C%16=C%15C=CC=C%16)C=C%13)C=CC(C(C)(C)C)=C5)C2=C1)C	CC1=CC=CC=C1	405
CC(C)(C)C1=CC=C2C(=C1)C1=C(C=CC(C(C)(C)C)=C1)N2C1=CC=C(S(=O)(=O)C2=CC=CC=C2)C=C1	CC1=CC=CC=C1	406
CC1=CC(C)=C(B(C2=CC=C(N3C4=C(C=CC=C4)C4=C3C=CC=C4)C=C2)C2=C(C)C=C(C)C=C2C)C(C)=C1	CC1=CC=CC=C1	406
FC(F)(F)C1=NC=C(C2=CC=C(N3C4=C(C=CC=C4)C4=C3C=CC=C4)C=C2)C=N1	CC1=CC=CC=C1	406
N#CC1=CC=C(C2=CC=CC(N3C4=C(C=CC=C4)C4=C3C=CC=C4)=C2)C(C2=CC(N3C4=C(C=CC=C4)C4=C3C=CC=C4)=CC=C2)=C1	CC1=CC=CC=C1	407
N#CC1=CC(C2=CCC(N(C3=CC=CC=C3)C3=CC=CC=C3)C=C2)=CC=C1	CC1=CC=CC=C1	407
CC(C)(C1=CC=C2OC3=C4B(C5=C(OC4=CC(C3)C6=CC=C(C=C6N7C8=C(C9=C7C=CC=C9)C(C%10=C%11C=CC=C%10)=C(C%11(C)C)C=C8)N%12C%13=C(C%14=C%12C=CC=C%14)C=C(C%15=C(C%16(C)C)C=CC=C%15)C%16=C%13)C=CC(C(C)(C)C)=C5)C2=C1)C	CC1=CC=CC=C1	407
CC(C)(C)C1=CC=C2C(=C1)C1=C(C=CC(C(C)(C)C)=C1)N2C1=CC=C(S(=O)(=O)C2=CC(N3C4=CC=C(C(C)(C)C)C=C4C4=C3C=CC(C(C)(C)C)=C4)=CC=C2)C=C1	CC1=CC=CC=C1	410
FC(F)(F)C1=CC(C2=CC=C(N3C4=C(C=CC=C4)C4=C3C=CC=C4)C=C2)=CC(C(F)(F)F)=N1	CC1=CC=CC=C1	411
C1=CC=C(C2=CC=C3C(=C2)C2=C(C=CC=C2)N3C2=CC=C(C3=NC(C4=CC=CC=C4)=NC(C4=CC=CC=C4)=C3)C=C2)C=C1	CC1=CC=CC=C1	412
CC(C)(C)C1=CC2=C(C=C1)OC1=CC(N3C4=C(C=C(N5C6=C(C=CC=C6)C6=C5C=CC=C6)C=C4)C4=C3C=CC(N3C5=C(C=CC=C5)C5C=CC=CC53)=C4)=CC3=C1B2C1=C(C=CC(C(C)(C)C)=C1)O3	CC1=CC=CC=C1	413
CC(C)(C)C1=CC=C2C(=C1)C1=C(C=CC(C(C)(C)C)=C1)N2C1=CC=CC(S(=O)(=O)C2=CC=CC=C2)=C1	CC1=CC=CC=C1	414
CC1=CC(C2=NC(C3=CC=CC=C3)=NC(C3=CC=CC=C3)=N2)=CC=C1N1C2=C(C=CC=C2)C2=C1C=CC=C2	CC1=CC=CC=C1	414
CC1=C(C2=NC(C3=CC=CC=C3)=NC(C4=CC=CC=C4)=N2)C=CC(N5C6=C(C7=C5C=CC=C7)C=CC=C6)=C1	CC1=CC=CC=C1	414
CC1=CC(C2=NC(C3=CC=CC=C3)=NC(C4=CC=CC=C4)=N2)=CC(C)=C1N5C6=C(C7=C5C=CC=C7)C=CC=C6	CC1=CC=CC=C1	414
C1=CC=C(C2=CC(C3=CC=C(N4C5=CC6=C(C=C5C5=C4C=CC=C5)C4=C(C=CC=C4)C64C5=C(C=CC=C5)C5=C4C=CC=C5)C=C3)=NC(C3=CC=CC=C3)=N2)C=C1	CC1=CC=CC=C1	414
CC(C)(C)C1=CC2=C(C=C1)N(C1=C(C#N)C(N3C4=C(C=C(C(C)(C)C)C=C4)C4=C3CCC(C(C)(C)C)=C4)=CC=C1)C1=C2C=C(C(C)(C)C)C=C1	CC1=CC=CC=C1	414
CCCCN1C(C2=CC=C(C3=CC=CC(C1=O)=C23)OC4=CC=CC=C4)=O	CC1=CC=CC=C1	415
CC(C)(C1=CC2=C(OC3=CC(N4C5=C(C6=C4C=CC(C(C)(C)C)=C6)C=C(C=C5)C(C)(C)C)=CC7=C3B2C8=C(O7)C=CC(C(C)(C)C)=C8)C=C1)C	CC1=CC=CC=C1	415
CC(C)(C1=CC2=C(OC3=CC(N4C5=C(C6=C4C=CC(C(C)(C)C)=C6)C=C(C=C5)C(C)(C)C)=CC7=C3B2C8=C(O7)C=CC(C(C)(C)C)=C8)C=C1)C	CC1=CC=CC=C1	415
CC(C)C1=CC2=C(C=C1)N(C1=CC=C(C3=C(C#N)C(OC4=CC(C5=CC=C(N6C7=C(C=C(C(C)(C)C)C=C7)C7=C6C=CC(C(C)(C)C)=C7)C=C5)=CC=C4)=CC=C3)C=C1)C1=C2C=C(C(C)(C)C)C=C1	CC1=CC=CC=C1	416
CC1=CC2=C(C=C1)N(C1=C(C#N)C(N3C4=C(C=C(C)C=C4)C4=C3CCC(C)=C4)=CC=C1)C1=C2C=C(C)C=C1	CC1=CC=CC=C1	417
CC(C)(C1=CC=C(C=C1)N(C2=CC=C(C=C2)S(=O)(C3=CC=C(C=C3)N(C4=CC=C(C=C4)C(C)(C)C)C5=CC=C(C=C5)C(C)(C)C)=O)C6=CC=C(C=C6)C(C)(C)C)C	CC1=CC=CC=C1	419
CC1=CC=CC2=C1N(C3=C2C=CC=C3)C(C=C4)=CC=C4C5=NC(C6=CC=CC=C6)=CC(C7=CC=CC=C7)=N5	CC1=CC=CC=C1	420
CC(C)(C)C1=CC2=C(C=C1)N(C1=CC=C3C(=O)C4=C(C=C(N5C6=C(C=C(C(C)(C)C)C=C6)C6=C5C=CC(C(C)(C)C)=C6)C=C4)N(C4=CC=CC=C4)C3=C1)C1=C2C=C(C(C)(C)C)C=C1	CC1=CC=CC=C1	420
N#CC1=CC=C(C=C1)C2=C3C=CC=CC3=C(C4=C2C=CC=C4)C5=CC=CC(C6=NC(C7=C(C8=C9C=CC=C8)C=CC=C7)=C9O6)=C5	CC1=CC=CC=C1	420
O=S(C1=C2C=CC=C1C(C=C3)=CC4=C3N(C5=CC=CC=C5)C6=C4C=CC=C6)(C7=C2C=CC=C7)=O	CC1=CC=CC=C1	420
CC(C)(C)C1=CC=C2C(=C1)C1=C(C=CC(C(C)(C)C)=C1)N2C1=CC(S(=O)(=O)C2=CC=CC(N3C4=CC=C(C(C)(C)C)C=C4C4=C3C=CC(C(C)(C)C)=C4)=C2)=CC=C1	CC1=CC=CC=C1	422
CC(C)(C)C1=CC2=C(C=C1)N(C1=CC=C(S(=O)(=O)C3=CC=CC(S(=O)(=O)C4=CC=C(N5C6=C(C=C(C(C)(C)C)C=C6)C6=C5C=CC(C(C)(C)C)=C6)C=C4)=C3)C=C1)C1=C2C=C(C(C)(C)C)C=C1	CC1=CC=CC=C1	422
CC(C)(C1=CC2=C(OC3=CC(N4C5=C(C6=C4C=CC(C7=CC=C(C(C)(C)C)C=C7)=C6)C=C(C8=CC=C(C(C)(C)C)C=C8)C=C5)=CC9=C3B2C%10=C(O9)C=CC(C(C)(C)C)=C%10)C=C1)C	CC1=CC=CC=C1	422
CC(C)(C)C1=CC=C(C2=CC3=C(C=C2)N(C2=CC4=C5B(C6=C(C=CC(C(C)(C)C)=C6)OC5=C2)C2=C(C=CC(C(C)(C)C)=C2)O4)C2=C3C=C(C3=CC=C(C(C)(C)C)C=C3)C=C2)C=C1	CC1=CC=CC=C1	422
C1(C2=NC(C3=CC=CC=C3)=NC(C4=CC=C(C=C4)N5C6=C(C7=C5C=CC=C7)C=CC=C6)=N2)=CC=CC=C1	CC1=CC=CC=C1	422
C1=CC=C(C2=CC(C3=CC=C(N4C5=CC=C6C7=C(C=CC=C7)C7(C8=C(C=CC=C8)C8=C7C=CC=C8)C6=C5C5=C4C=CC=C5)C=C3)=NC(C3=CC=CC=C3)=N2)C=C1	CC1=CC=CC=C1	424
CC1(C)C2=CC=CC=C2N(C2=CC=C3SC4=C(C=C(N5C6=CC=CC=C6C(C)(C)C6=C5C=CC=C6)C=C4)C3=C2)C2=C1C=CC=C2	CC1=CC=CC=C1	424
CCCCN1C(C2=CC=C(C3=CC=CC(C1=O)=C23)OC4=C(C)C=CC=C4C)=O	CC1=CC=CC=C1	425
O=S1(=O)C2=CC=CC=C2N(C2=CC=CC=C2)C2=C1C=CC(N1C3=C(C=CC=C3)C(C3=CC=CC=C3)(C3=CC=CC=C3)C3=C1C=CC=C3)=C2	CC1=CC=CC=C1	425
FC(F)(F)C1=NC(C(F)(F)F)=C(C2=CC=C(N3C4=C(C=CC=C4)C4=C3C=CC=C4)C=C2)C=C1	CC1=CC=CC=C1	428
COC1=CC=C(C2=NN=C(C3=CC(C4=NN=C(C5=CC=C(OC)C=C5)O4)=C(N4C5=CC=CC=C5C5=C4C=CC=C5)C=C3N3C4=CC=CC=C4C4=C3C=CC=C4)O2)C=C1	CC1=CC=CC=C1	428
C1=CC=C(N2C3=CC=CC=C3C3=C2C=C2OC4=CC=CC=C4B4C5=C(C=CC=C5)OC3=C42)C=C1	CC1=CC=CC=C1	428
N#CC1=CC=C(C2=CC=CC(C3=CC=C(C#N)C(N4C5=C(C=CC=C5)C5=C4C=CC=C5)=C3)=C2)C=C1N1C2=C(C=CC=C2)C2=C1C=CC=C2	CC1=CC=CC=C1	429
C1=CC=C(N2C3=CC=C(C4=CC(C5=NC(C6=CC=CC(C7=CC=C8C(=C7)C7=C(C=CC=C7)N8C7=CC=CC=C7)=C6)=NC(C6=CC=CC(C7=CC8=C(C=C7)N(C7=CC=CC=C7)C7=CC=CC=C78)=C6)=N5)=CC=C4)C=C3C3=C2C=CC=C3)C=C1	CC1=CC=CC=C1	430
CC1=CC2=C(C(C)=C1)N(C1=CC3=C(C=C1)S(=O)(=O)C1=C(C=C(N4C5=C(C=C(C)C=C5C)C5=C4C(C)=CC(C)=C5)C=C1)C3(C)C)C1=C2C=C(C)C=C1C	CC1=CC=CC=C1	430
CC1=CC(C)=C(B(C2=CC3=C(C=C2)N2C4=C(C=CC=C4)C(C)(C)C4=C2C(=CC=C4)C3(C2=CC=CC=C2)C2=CC=CC=C2)C2=C(C)C=C(C)C=C2C)C(C)=C1	CC1=CC=CC=C1	430
C1=CC=C(C2=NC(C3=CC=CC=C3)=NC(C3=CC=C(N4C5=CC=CC=C5C5=CC6=C(C=C54)C4(C5=CC=CC=C5C5=CC=CC=C54)C4=CC=CC=C46)C=C3)=N2)C=C1	CC1=CC=CC=C1	432
C1=CC2=C(C=C1)N(C1=CC=C3C=CC(N4C5=C(C=CC=C5)C5=C4C=CC=C5)=NC3=N1)C1=C2C=CC=C1	CC1=CC=CC=C1	432
CC1=CC2=C(C=C1)N(C1=CC=C(C3=NC(C4=CC=CC=C4)=NC(C4=CC=CC=C4)=N3)C=C1)C1=C2C=C(C)C=C1	CC1=CC=CC=C1	432
CC1=CC2=C(C=C1)N(C1=C(C)C=C(C3=NC(C4=CC=CC=C4)=NC(C4=CC=CC=C4)=N3)C=C1C)C1=C2C=C(C)C=C1	CC1=CC=CC=C1	432
CC(C)(C)C1=CC=C2OC3=CC(N4C5=C(C=C(C6=CC=C7C(=C6)C6=C(C=CC=C6)N7C6=CC=CC=C6)C=C5)C5=C4C=CC(C4=CC6=C(C=C4)N(C4=CC=CC=C4)C4=CC=CC=C46)=C5)=CC4=C3B(C2=C1)C1=C(C=CC(C(C)(C)C)=C1)O4	CC1=CC=CC=C1	433
CC1(C2=C(N(C3=C1C=CC=C3)C4=CC5=C(P(C6=CC=CC=C6)(C7=CC=CC=C7O5)=O)C=C4)C=CC=C2)C	CC1=CC=CC=C1	433
O=S(C(C=C1)=CC=C1N2C(C=CC=C3)=C3C(C=C4)=C2C5=C4C(C=CC=C6)=C6N5C7=CC=CC=C7)(C8=CC=CC=C8)=O	CC1=CC=CC=C1	433
CC(C)(C)C1=CC2=C(C=C1)OC1=CC(N3C4=CC=C(C5=CC=C6C(=C5)C5=C(C=CC=C5)N6C5=CC=CC=C5)C=C4C4=C3C=CC(C3=CC5=C(C=C3)N(C3=CC=CC=C3)C3=CC=CC=C35)=C4)=CC3=C1B2C1=C(C=CC(C(C)(C)C)=C1)O3	CC1=CC=CC=C1	433
CC(C)(C)C1=CC2=C(C=C1)OC1=CC(N3C4=C(C=C(C5=CC=C6C(=C5)C5=C(C=CC=C5)N6C5=CC=CC=C5)C=C4)C4=C3C=CC(C3=CC5=C(C=C3)N(C3=CC=CC=C3)C3=C5C=CC=C3)=C4)=CC3=C1B2C1=C(C=CC(C(C)(C)C)=C1)O3	CC1=CC=CC=C1	433
CC(C)(C)C1=CC2=C3B(C4=C(C=CC=C4)O2)C2=C(C=CC=C2)N(C2=CC=CC=C2)C3=C1	CC1=CC=CC=C1	433
CC1=CC=CC2=C1N(C3=C2C=CC=C3)C(C=C4)=CC=C4C5=NC(C6=CC=CC=C6)=NC(C7=CC=CC=C7)=N5	CC1=CC=CC=C1	435
CC1=CC2=C(C=C1)N(C1=CC=C(C3=NC(C4=CC=CC=C4)=NC(C4=CC=CC=C4)=N3)C=C1C)C1=C2C=C(C)C=C1	CC1=CC=CC=C1	435
F[B-]1(OC2=CC=CC=C2C3=CC(C4=C(C=C(C=C4C)N5C6=C(C7=C5C=CC=C7)C=CC=C6)C)=CC=[N+]31)F	CC1=CC=CC=C1	435
CC1=C(C=CC(N2C3=C(C(C)(C4=C2C=CC=C4)C)C=CC=C3)=C1)C5=NN(N=C5C6=CC=C(C=C6C)N7C8=C(C(C)(C9=C7C=CC=C9)C)C=CC=C8)C%10=CC=C(C=C%10)C#N	CC1=CC=CC=C1	436
CC1(C)C2=C(C=CC=C2)N(C2=CC=C3C(=C2)C2=C(C=CC=C2)N2C3=NC3=C2C=CC=C3)C2=C1C=CC=C2	CC1=CC=CC=C1	437
CC(C)(C)C1=CC2=C(C=C1)N(C1=CC3=C(C=C1)SC1=C3C=C(N3C4=C(C=C(C(C)(C)C)C=C4)C(C)(C)C4=C3C=CC(C(C)(C)C)=C4)C=C1)C1=C(C=C(C(C)(C)C)C=C1)C2(C)C	CC1=CC=CC=C1	437
CC1(C)C2=C(C=CC=C2)N(C2=CC3=C(C=C2)C2=C(C=C(N4C5=C(C=CC=C5)C(C)(C)C5=C4C=CC=C5)C=C2)C32C3=CC=CC=C3S(=O)(=O)C3=C2C=CC=C3)C2=C1C=CC=C2	CC1=CC=CC=C1	437
CC(C)C1=CC(C(C)C)=C(B2C3=CC=CC=C3OC3=C2C=CC(N2C4=CC=CC=C4C4=C2C2=C(C=C4)N(C4=CC=CC=C4)C4=C2C=CC=C4)=C3)C(C(C)C)=C1	CC1=CC=CC=C1	438
O=C(C1=CC=C(N2C3=C(C=CC=C3)C3=C2C=CC=C3)C=C1)C1=CC=C(N2C3=C(C=CC=C3)C3=C2C=CC=C3)C=C1	CC1=CC=CC=C1	438
O=C(C1=CC=CC=C1)C2=CC=CC(C3=CC4=C(N(C5=C4C=CC=C5)C6=CC=CC=C6)C=C3)=C2	CC1=CC=CC=C1	438
C1([Si]2(C3=C(N(C4=C2C=CC=C4)C5=CC6=C7B(C8=C(O6)C=CC=C8)C9=CC=CC=C9OC7=C5)C=CC=C3)C%10=CC=CC=C%10)=CC=CC=C1	CC1=CC=CC=C1	439
CC(C)(C)C1=CC2=C(C=C1)N(C1=CC=C(C3=NC(C4=CC=CC=C4)=NC(C4=CC=CC=C4)=N3)C=C1)C1=C2C=C(C(C)(C)C)C=C1	CC1=CC=CC=C1	439
C1=CC=C(C2=NN=C(C3=CC(C4=NN=C(C5=CC=CC=C5)O4)=C(N4C5=CC=CC=C5C5=C4C=CC=C5)C=C3N3C4=CC=CC=C4C4=C3C=CC=C4)O2)C=C1	CC1=CC=CC=C1	439
CC1(C)C2=C(C=CC=C2)N(C2=CC3=C4C(=C2)C2=C(C=CC=C2)N4C2=C3C=CC=C2)C2=C1C=CC=C2	CC1=CC=CC=C1	439
CC1=CC=CC2=C1N(C1=CC=C(C3=C(C4=CC=C(N5C6=C(C=CC=C6)C6=C5C(C)=CC=C6)C=C4)C(C4=CC=CC=C4)=C(C#N)C(C#N)=C3C3=CC=CC=C3)C=C1)C1=C2C=CC=C1	CC1=CC=CC=C1	440
C[C@H](N1C2=C(S(=O)(C3=C1C=C(C=C3)N4C5=C(C(C)(C6=C4C=CC=C6)C)C=CC=C5)=O)C=CC(N7C8=C(C(C)(C9=C7C=CC=C9)C)C=CC=C8)=C2)C%10=CC=CC=C%10	CC1=CC=CC=C1	440
CC(C)(C1=CC2=C(N(C3=C2C=C(C=C3)C(C)(C)C)C4=CC=C(C=C4)C5=NC(C6=CC=CC=C6)=NC(C7=CC=CC=C7)=N5)C(C8=CC=CC=C8)=C1)C	CC1=CC=CC=C1	440
N#CC1=CC=C(C2=C3C=CC=CC3=C(C3=CC=C(C4=NC5=C(O4)C4=C(C=CC=C4)C4=C5C=CC=C4)C=C3)C3=C2C=CC=C3)C=C1	CC1=CC=CC=C1	440
CC1(C)C2=C(C=CC=C2)N(C2=CC3=C(C=C2)S(=O)(=O)C2=CC=CC=C2N3C2=CC=CC=C2)C2=C1C=CC=C2	CC1=CC=CC=C1	441
CC(C)(C)C1=CC2=C3B(C4=C(C=CC=C4)O2)C2=C4C(=CC=C2)C2=CC=CC=C2N4C3=C1	CC1=CC=CC=C1	441
N(C1=CC=CC=C1)(C2=CC=CC=C2)C3=CC4=C5B(C6=C(N(C7=CC=CC=C7)C5=C3)C=CC=C6)C8=CC9=C(OC%10=C%11B9C%12=C(N(C%13=CC=CC=C%13)C%11=CC(N(C%14=CC=CC=C%14)C%15=CC=CC=C%15)=C%10)C=CC=C%12)C=C8O4	CC1=CC=CC=C1	441
N#CC1=C(N2C3=C(C=CC=C3)C3=C2C=CC=C3)C(N2C3=C(C=CC=C3)C3=C2C=CC=C3)=CC(N2C3=C(C=CC=C3)C3=C2C=CC=C3)=C1N1C2=C(C=CC=C2)C2=C1C=CC=C2	CC1=CC=CC=C1	442
C1=CC=C(C2=NC(C3=CC=CC=C3)=NC(C3=CC=C(N4C5=CC=CC=C5C5=CC6=C(C=C54)C(C4=CC=CC=C4)(C4=CC=CC=C4)C4=CC=CC=C46)C=C3)=N2)C=C1	CC1=CC=CC=C1	442
O=S(C1=CC(C)=C(N2C3=CC=CC=C3C4(C5=C2C=CC=C5)C6=CC=CC7=C6N(C8=C4C=CC=C8)C9=CC=CC=C97)C=C1)(C%10=CC(C)=C(C=C%10)N%11C%12=CC=CC=C%12C%13(C%14=C%11C=CC=C%14)C%15=CC=CC%16=C%15N(C%17=C%13C=CC=C%17)C%18=CC=CC=C%18%16)=O	CC1=CC=CC=C1	442
O=S(C1=CC(C)=C(N2C3=CC=CC=C3C4(C5=CC=CC6=C5N(C7=CC=CC=C76)C8=C4C=CC=C8)C9=C2C=CC=C9)C=C1)(C%10=CC(C)=C(N%11C%12=CC=CC=C%12C%13(C%14=CC=CC%15=C%14N(C%16=CC=CC=C%16%15)C%17=C%13C=CC=C%17)C%18=C%11C=CC=C%18)C=C%10)=O	CC1=CC=CC=C1	442
CC1=CC2=C(C(C)=C1)N(C1=CC3=C(C=C1)B(C1=C(C(C)C)C=C(C(C)C)C=C1C(C)C)C1=CC=CC=C1O3)C1=C2C=C(C)C=C1C	CC1=CC=CC=C1	443
N#CC1=C(N2C3=C(C=CC=C3)C3=C2C=CC=C3)C(F)=C(N2C3=C(C=CC=C3)C3=C2C=CC=C3)C(F)=C1N1C2=C(C=CC=C2)C2=C1C=CC=C2	CC1=CC=CC=C1	443
FC(C1=C(C2=NC(C3=CC=CC=C3)=NC(C4=CC=CC=C4)=N2)C=CC(N5C6=C(C7=C5C=CC=C7)C=CC=C6)=C1)(F)F	CC1=CC=CC=C1	443
CC(C)(C)C1=CC2=C(C=C1)N(C1=CC=C(C3=NC(C4=CC=CC=C4)=NC(C4=CC=CC=C4)=N3)C=C1)C1=C2C=C(C(C)(C)C)C=C1C1=CC=C(N2C3=C(C=CC=C3)C3=C2C=CC=C3)C=C1	CC1=CC=CC=C1	443
F[B-]1(OC2=CC=CC=C2C3=CC(C4=C(C=C(C=C4C)N5C6=C(C7=C5C=CC(C8=CC=CC=C8)=C7)C=C(C=C6)C9=CC=CC=C9)C)=CC=[N+]31)F	CC1=CC=CC=C1	443
CC(C)(C)C1=CC2=C(C(N3C4=CC=C(C=C4C5=C3C=CC(C(C)(C)C)=C5)C(C)(C)C)=C1)N(C6=NC7=NC(N8C9=C(C=C(C=C9C%10=C8C=CC(C(C)(C)C)=C%10)C(C)(C)C)N%11C%12=CC=C(C=C%12C%13=C%11C=CC(C(C)(C)C)=C%13)C(C)(C)C)=CC=C7C=C6)C%14=C2C=C(C(C)(C)C)C=C%14	CC1=CC=CC=C1	443
C1=CC2=C(C=C1)B1C3=C(C=CC=C3)OC3=C(C4=CC=C(N5C6=C(C=CC=C6)OC6=C5C=CC=C6)C=C4)C=CC(=C13)O2	CC1=CC=CC=C1	444
N#CC1=CC(C#N)=C(N2C3=C(C=CC=C3)C3=C2C=CC=C3)C=C1N1C2=C(C=CC=C2)C2=C1C=CC=C2C1=CC=CC2=C1C1=C(C=CC=C1)N2C1=CC(N2C3=C(C=CC=C3)C3=C2C=CC=C3)=C(C#N)C=C1C#N	CC1=CC=CC=C1	444
CC(C)(C)C1=CC=CC=C1N(C1=CC=CC=C1)C1=CC=C(S(=O)(=O)C2=CC=C(S(=O)(=O)C3=CC=C(N(C4=CC=CC=C4)C4=C(C(C)(C)C)C=CC=C4)C=C3)C=C2)C=C1	CC1=CC=CC=C1	444
CC1=NN=C(C2=CC(C3=NN=C(C)O3)=C(N3C4=CC=CC=C4C4=C3C=CC=C4)C=C2N2C3=CC=CC=C3C3=C2C=CC=C3)O1	CC1=CC=CC=C1	444
C1=CC=C(C2=NC(C3=CC=CC=C3)=NC(C3=CC=C(N4C5=C(C=CC=C5)C5=C4C=CC4=C5C5=C(C=CC=C5)C45C4=C(C=CC=C4)C4=C5C=CC=C4)C=C3)=N2)C=C1	CC1=CC=CC=C1	444
CC1=CC=C2C(=C1)C1=C(C=CC(C3=CC4=C(C=C3)N(C3=CC5=C6B(C7=C(C=CC=C7)OC6=C3)C3=C(C=CC=C3)O5)C3=CC=C(C5=CC=C6C(=C5)C5=C(C=CC(C)=C5)N6C5=CC=CC=C5)C=C34)=C1)N2C1=CC=CC=C1	CC1=CC=CC=C1	445
C1=C=CC2=C(C=1)C1=C(C3=C(SC4=C3C=CC=C4)C3=C1N(C1=CC4=C5B(C6=C(C=CC=C6)OC5=C1)C1=C(C=CC=C1)O4)C1=C3C=CC=C1)N2C1=CC=CC=C1	CC1=CC=CC=C1	445
COC1=CC2=C(C=C1)N(C1=CC=C(S(=O)(=O)C3=CC=C(N4C5=C(C=C(OC)C=C5)C5=C4C=CC(OC)=C5)C=C3)C=C1)C1=C2C=C(OC)C=C1	CC1=CC=CC=C1	445
CC1=CC=C2C(=C1)C1=C(C=CC(C3=CC4=C(C=C3)N(C3=CC5=C6B(C7=C(C=CC=C7)O5)C5=C(CCC=C5)OC6=C3)C3=CC=C(C5=CC=C6C(=C5)C5=C(C=CC(C)=C5)N6C5=CC=CC=C5)C=C34)=C1)N2C1=CC=CC=C1	CC1=CC=CC=C1	445
C1=CC=C(N2C3=C(C=CC=C3)C3=C2C2=C(OC4=C2C=CC=C4)C2=C3N(C3=CC4=C5B(C6=C(C=CC=C6)OC5=C3)C3=C(C=CC=C3)O4)C3=C2C=CC=C3)C=C1	CC1=CC=CC=C1	446
CC(C)(C)C1=CC2=C(C=C1)N(C1=CC=C(S(=O)(=O)C3=CC=C(S(=O)(=O)C4=CC=C(N5C6=C(C=C(C(C)(C)C)C=C6)C6=C5C=CC(C(C)(C)C)=C6)C=C4)C=C3)C=C1)C1=C2C=C(C(C)(C)C)C=C1	CC1=CC=CC=C1	446
C1=CC=C(C2=NC(C3=CC=CC=C3)=NC(C3=CC=C(N4C5=CC=CC=C5C5=C6C(=CC=C54)C4=CC=CC=C4C6(C4=CC=CC=C4)C4=CC=CC=C4)C=C3)=N2)C=C1	CC1=CC=CC=C1	446
CC(C)(C)C1=CC(B2C3=CC(C(C)(C)C)=CC=C3OC4=C2C5=CC(N6C(C=CC=C7)=C7C8(C9=C(C%10(C%11=C8C=CC=C%11)C%12=C(C%13=C%10C=CC=C%13)C=CC=C%12)C=CC=C9)C%14=CC=CC=C6%14)=C4)=C(O5)C=C1	CC1=CC=CC=C1	446
CC1(C2=C(N(C3=C1C=CC=C3)C4=CC=C(C=C4)C5=NN(N=C5C6=CC=C(C=C6)N7C8=C(C(C)(C9=C7C=CC=C9)C)C=CC=C8)C%10=CC=C(C=C%10)C#N)C=CC=C2)C	CC1=CC=CC=C1	446
CC(C)(C)C1=CC2=C(C=C1)N1C3=CC=C(C4=NC(C5=CC=CC=C5)=NC(C5=CC=CC=C5)=N4)C=C3C3=CC=CC(N4C5=C(C=CC=C5)C5=C4C=CCC5)=C3C3=CC(C(C)(C)C)=CC2=C31	CC1=CC=CC=C1	446
O=S(C1=CC=C(C=C1)N2C3=CC=CC=C3C4(C5=C2C=CC=C5)C6=CC=CC7=C6N(C8=C4C=CC=C8)C9=CC=CC=C97)(C%10=CC=C(C=C%10)N%11C%12=CC=CC=C%12C%13(C%14=C%11C=CC=C%14)C%15=CC=CC%16=C%15N(C%17=C%13C=CC=C%17)C%18=CC=CC=C%18%16)=O	CC1=CC=CC=C1	447
[H]C1=C(N2C3=CC=CC=C3C4(C5=CC=CC6=C5N(C7=CC=CC=C76)C8=C4C=CC=C8)C9=C2C=CC=C9)C=CC(S(=O)(C%10=CC([H])=C(N%11C%12=CC=CC=C%12C%13(C%14=CC=CC%15=C%14N(C%16=CC=CC=C%16%15)C%17=C%13C=CC=C%17)C%18=C%11C=CC=C%18)C=C%10)=O)=C1	CC1=CC=CC=C1	447
CC1C2=CC=CC3=C2B2C4=C(C=CC=C4C(C)C4=C2C1=CC(N1C2=CC=CC=C2C2(C5=C(C=CC=C5)C5=C2C=CC=C5)C2=C1C=CC=C2)=C4)C3	CC1=CC=CC=C1	448
N#CC1=CC(C#N)=C(N2C3=C(C=CC=C3)C3=C2C=CC=C3)C=C1N1C2=C(C=CC=C2)C2=C1C=CC=C2C1=CC2=C(C=C1)N(C1=CC(N3C4=C(C=CC=C4)C4=C3C=CC=C4)=C(C#N)C=C1N)C1=C2C=CC=C1	CC1=CC=CC=C1	448
N#CC1=C(C2=CC=CC=C2)C(C#N)=C(N2C3=C(C=CC=C3)C3=C2C=CC=C3)N=C1N1C2=C(C=CC=C2)C2=C1C=CC=C2	CC1=CC=CC=C1	448
O=C1C2=CC=CC=C2S(=O)(=O)C2=C1C=C(N1C3=C(C=CC=C3)C3=C1C=CC=C3)C=C2	CC1=CC=CC=C1	448
CC(C)(C1=CC=C2OC3=CC(N(C4=C5C=CC=C4)C6=CC=CC=C6C75C8=CC=CC=C8N(C9=C7C=CC=C9)C%10=CC%11=C%12B(C%13=C(O%11)C=CC(C(C)(C)C)=C%13)C%14=CC(C(C)(C)C)=CC=C%14OC%12=C%10)=CC%15=C3B(C%16=C(O%15)C=CC(C(C)(C)C)=C%16)C2=C1)C	CC1=CC=CC=C1	448
CC1(C)C2=CC=CC=C2N(C2=CC=C3C(=C2)C(C2=CC=CC=C2)(C2=CC=CC=C2)C2=C(C=CC(N4C5=CC=CC=C5C(C)(C)C5=C4C=CC=C5)=C2)S3(=O)=O)C2=C1C=CC=C2	CC1=CC=CC=C1	448
FC1=CC(C2=NC(C3=CC=CC=C3)=NC(C3=CC=CC=C3)=N2)=CC=C1N1C2=C(C=CC=C2)C2=C1C=CC1=C2C2=C(C=CC=C2)C12C1=C(C=CC=C1)C1=C2C=CC=C1	CC1=CC=CC=C1	448
CC(C)(C)C1=CC2=C(C=C1)N1C3=C(C=C(C(C)(C)C)C=C23)C(=O)C2=CC=CC(N3C4=C(C=CC=C4)C4=C3C=CC=C4)=C21	CC1=CC=CC=C1	449
CC1=CC(C)=C(B(C2=C(C)C=C(C)C=C2C)C2=C(C)C=C(N3C4=C(C=CC=C4)C(C4=CC=CC=C4)(C4=CC=CC=C4)C4=C3C=CC=C4)C=C2C)C(C)=C1	CC1=CC=CC=C1	449
F[B-]1(OC2=CC(C3=CC=CC=C3C)=CC=C2C4=CC=CC5=[N+]14)OC6=C5C=CC(C7=C(C=CC=C7)C)=C6	CC1=CC=CC=C1	449
C1=CC=C(N(C2=CC=CC=C2)C2=CC3=C4B(C5=CC=CC=C5N3C3=CC=CC=C3)C3=C(C=CC=C3)N(C3=CC=CC=C3)C4=C2)C=C1	CC1=CC=CC=C1	449
CC1(C)C2=C(C=CC=C2)N(C2=CC3=C(C=C2)N2C4=C(C=CC=C4)C4=CC(N5C6=C(C=CC=C6)C(C)(C)C6=C5C=CC=C6)=CC3=C42)C2=C1C=CC=C2	CC1=CC=CC=C1	449
CC(C1=CC2=C(N(C3=C(C2(C)C)C=C(C=C3)C(C)(C)C)C4=CC(C(F)(F)F)=CC(N5C6=C(C(C)(C7=C5C=CC(C(C)(C)C)=C7)C)C=C(C=C6)C(C)(C)C)=C4)C=C1)(C)C	CC1=CC=CC=C1	449
C1([Si]2(C3=C(N(C4=C2C=CC=C4)C5=CC=C6B7C8=C(OC9=C7C(OC6=C5)=CC=C9)C=C(C=C8)N%10C%11=C([Si](C%12=CC=CC=C%12)(C%13=C%10C=CC=C%13)C%14=CC=CC=C%14)C=CC=C%11)C=CC=C3)C%15=CC=CC=C%15)=CC=CC=C1	CC1=CC=CC=C1	450
CC(C)(C)C1=CC=C(OC2=C3)C(B(C4=C(O5)C=CC(C(C)(C)C)=C4)C2=C5C=C3N6C7=CC=CC=C7C8(C9=C(N(C%10=CC=CC=C%108)C%11=CC=C(C(C)(C)C)C=C%11)C=CC=C9)C%12=C6C=CC=C%12)=C1	CC1=CC=CC=C1	450
CC(C)(C)C1=CC2=C(C=C1)OC1=CC(N3C4=C(C=CC=C4)C4(C5=C(C=CC=C5)C5=C4C=CC=C5)C4=C3C=CC=C4)=CC3=C1B2C1=C(C=CC(C(C)(C)C)=C1)O3	CC1=CC=CC=C1	450
CCCCC1=CC2=C(C=C1)N(C1=CC=C(S(=O)(=O)C3=CC=C(S(=O)(=O)C4=CC=C(N5C6=C(C=C(CCCC)C=C6)C6=C5C=CC(CCCC)=C6)C=C4)C=C3)C=C1)C1=C2C=C(CCCC)C=C1	CC1=CC=CC=C1	450
CC1=CC(C)=C(N(C2=CC=CC=C2)C2=CC=C(S(=O)(=O)C3=CC=C(S(=O)(=O)C4=CCC(N(C5=CC=CC=C5)C5=C(C)C=C(C)C=C5C)C=C4)C=C3)C=C2)C(C)=C1	CC1=CC=CC=C1	450
CC(C)C1=CC(C(C)C)=C(B2C3=CC=CC=C3OC3=C2C=CC(N2C4=C(C=CC=C4)C4(C5=CC=CC=C5OC5=C4C=CC=C5)C4=C2C=CC=C4)=C3)C(C(C)C)=C1	CC1=CC=CC=C1	451
CC1(C2=C(N(C3=C1C=CC=C3)C4=CC5=C(S(=O)(C6=CC=CC=C6O5)=O)C=C4)C=CC=C2)C	CC1=CC=CC=C1	451
CC1=CC=C2B3C4=C(C=C(C)C=C4)OC4=CC(N5C6=C(C=CC=C6)C6=C5C5=C(C7=C6N(C6=CC=CC=C6)C6=C7C=CC=C6)N(C6=CC=CC=C6)C6=C5C=CC=C6)=CC(=C34)OC2=C1	CC1=CC=CC=C1	451
C1=CC2=C(C=C1)N(C1=CC(C3=CC(N4C5=C(C=CC=C5)C5=C4C=CC=C5)=NC(N4C5=C(C=CC=C5)C5=C4C=CC=C5)=C3)=CC(N3C4=C(C=CC=C4)C4=C3C=CC=C4)=N1)C1=C2C=CC=C1	CC1=CC=CC=C1	451
O=S(=O)(C1=CC=C(N(C2=CC=CC=C2)C2=CC=CC=C2)C=C1)C1=CC=C(S(=O)(=O)C2=CC=C(N(C3=CC=CC=C3)C3=CC=CC=C3)C=C2)C=C1	CC1=CC=CC=C1	451
C12=CC=CC=C1OC3=C4B2C5=C(OC4=CC(N6C(C=CC=C7)=C7C8(C9=C(C%10(C%11=C8C=CC=C%11)C%12=C(C%13=C%10C=CC=C%13)C=CC=C%12)C=CC=C9)C%14=CC=CC=C6%14)=C3)C=CC=C5	CC1=CC=CC=C1	452
C1=CC=C(C2=NC(C3=CC=CC=C3)=NC(C3=CC=C(N4C5=C(C=CC=C5)C5=C4C=CC(C4=CC=C6C(=C4)C4=C(C=CC=C4)N6C4=CN=CC=C4)=C5)C=C3)=N2)C=C1	CC1=CC=CC=C1	452
CC(C)C1=CC(N2C3=CC=CC=C3C3(C4=C(C=CC=C4)C4=C3C=CC=C4)C3=C2C=CC=C3)=CC(C(C)C)=C1B1C2=C(C=CC=C2)C2(C3=C1C=CC=C3)C1=C(C=CC=C1)C1=C2C=CC=C1	CC1=CC=CC=C1	453
CC1=CC=C(S(=O)(=O)C2=CC(N3C4=C(C=CC=C4)C4=C3C=CC=C4)=NC(N3C4=C(C=CC=C4)C4=C3C=CC=C4)=C2)C=C1	CC1=CC=CC=C1	453
N#CC1=C(N2C3=C(C=CC=C3)C3=C2C=CC=C3)C(N2C3=C(C=CC=C3)C3=C2C=CCC3)=C(N2C3=C(C=CC=C3)C3=C2C=CC=C3)C(F)=C1N1C2=C(C=CC=C2)C2=C1C=CC=C2	CC1=CC=CC=C1	453
N#CC1=CC(C#N)=C(N2C3=C(C=CC=C3)C3=C2C=CC=C3)C=C1N1C2=C(C=CC=C2)C2=C1C=CC=C2	CC1=CC=CC=C1	453
N(C1=CC=CC=C1)(C2=CC3=C4B(C5=CC6=C(C=C5S3)OC7=C8B6C9=C(C=CC=C9)N(C8=CC(N(C%10=CC=CC=C%10)C%11=CC=CC=C%11)=C7)C%12=CC=CC=C%12)C%13=C(C=CC=C%13)N(C4=C2)C%14=CC=CC=C%14)C%15=CC=CC=C%15	CC1=CC=CC=C1	453
CC(C)(C)C1=CC=C(N(C2=CC=C(C(C)(C)C)C=C2)C2=CC3=C4B(C5=CC(C(C)(C)C)=CC=C5N3C3=CC=C(C(C)(C)C)C=C3)C3=CC=CC5=C3N(C4=C2)C2=C(C=CC=C2)C5(C)C)C=C1	CC1=CC=CC=C1	454
CC1=CC(C)=C(B(C2=CC3=C(C=C2)N2C4=C(C=CC=C4)OC4=C2C(=CC=C4)C3(C2=CC=CC=C2)C2=CC=CC=C2)C2=C(C)C=C(C)C=C2C)C(C)=C1	CC1=CC=CC=C1	454
CC(C)(C)C1=CC=C(N(C2=CC=C(S(=O)(=O)C3=CC=C(S(=O)(=O)C4=CC=C(N(C5=CC=C(C(C)(C)C)C=C5)C5=C(C(C)(C)C)C=CC=C5)C=C4)C=C3)C=C2)C2=CC=CC=C2C(C)(C)C)C=C1	CC1=CC=CC=C1	454
N#CC1=CC(C#N)=C(N2C3=CC=CC=C3C3=C2C=CC=C3)C=C1N1C2=CC=CC=C2C2=C1C=CC=C2	CC1=CC=CC=C1	454
CC(C)(C)C1=CC=C(N2C3=CC(N4C5=C(C=CC=C5)C(C5=CC=CC=C5)(C5=CC=CC=C5)C5=C4C=CC=C5)=CC4=C3B(C3=CC(C(C)(C)C)=CC=C3N4C3=CC=C(C(C)(C)C)C=C3)C3=C2C=CC(C(C)(C)C)=C3)C=C1	CC1=CC=CC=C1	454
C1(C2=NN=C(N2C3=CC=CC=C3)C4=CC=C(N(C5=C(O6)C=CC=C5)C7=C6C=CC=C7)C=C4)=CC=CC=C1	CC1=CC=CC=C1	455
CC(C)(C)C1=CC2=C(C=C1)N(C1=CC(N3C4=C(C=C(C(C)(C)C)C=C4)C4=C3C=CC(C(C)(C)C)=C4)=C(N3C4=C(C=CC=C4)C4=C3C=CC=C4)C(C#N)=C1N1C3=C(C=CC=C3)C3=C1C=CC=C3)C1=C2C=C(C(C)(C)C)C=C1	CC1=CC=CC=C1	455
CC(C)(C)C1=CC2=C(C=C1)N(C1=CC=C3C=CC(N4C5=C(C=C(C(C)(C)C)C=C5)C5=C4C=CC(C(C)(C)C)=C5)=NC3=N1)C1=C2C=C(C(C)(C)C)C=C1	CC1=CC=CC=C1	455
C1(C2=NC(C3=CC=CC=C3)=NC(C4=CC=C(C=C4)N5C6=C(C7=C5C=CC(C8=CC=C9C(C=CN9C%10=CN=CC=C%10)=C8)=C7)C=CC=C6)=N2)=CC=CC=C1	CC1=CC=CC=C1	455
CC(C)C1=CC(C(C)C)=C(B2C3=CC=CC=C3OC3=C2C=CC(N2C4=C(C=CC=C4)C4(C5=C(C=CC=C5)C5=C4C=CC=C5)C4=C2C=CC=C4)=C3)C(C(C)C)=C1	CC1=CC=CC=C1	456
CC(C)(C)C1=CC=C2OC3=CC(N4C5=C(C=CC=C5)C5=C4C4=C(C6=C5N(C5=CC=CC=C5)C5=C6C=CC=C5)N(C5=CC=CC=C5)C5=C4C=CC=C5)=CC4=C3B(C2=C1)C1=CC(C(C)(C)C)=CC=C1O4	CC1=CC=CC=C1	456
C1=CC2=C(C=C1)B1C3=C(C=CC=C3)OC3=C(C4=CC=C(N5C6=C(C=CC=C6)SC6=C5C=CC=C6)C=C4)C=CC(=C13)O2	CC1=CC=CC=C1	456
CC(C)(C)C1=CC2=C(C=C1)N(C1=CC(N3C4=C(C=C(C(C)(C)C)C=C4)C4=C3C=CC(C(C)(C)C)=C4)=C(N3C4=C(C=C(C(C)(C)C)C=C4)C4=C3CCC(C(C)(C)C)=C4)C(C#N)=C1N1C3=C(C=C(C(C)(C)C)C=C3)C3=C1C=CC(C(C)(C)C)=C3)C1=C2C=C(C(C)(C)C)C=C1	CC1=CC=CC=C1	456
CC1(C)C2=CC=CC=C2C2=CC3=C(C=C21)N(C1=CC=C(C2=NC(C4=CC=CC=C4)=NC(C4=CC=CC=C4)=N2)C=C1)C1=CC=CC=C13	CC1=CC=CC=C1	456
CC1=C(C=CC(N2C3=C(C(C)(C4=C2C=CC(C(C)(C)C)=C4)C)C=C(C=C3)C(C)(C)C)=C1)C5=NN(N=C5C6=CC=C(C=C6C)N7C8=C(C(C)(C9=C7C=CC(C(C)(C)C)=C9)C)C=C(C=C8)C(C)(C)C)C%10=CC=C(C=C%10)C#N	CC1=CC=CC=C1	456
CC(C)(C)C1=CC=C(N2C3=CC(N(C4=CC=CC=C4)C4=CC=CC=C4)=CC4=C3B(C3=CC(C(C)(C)C)=CC=C3N4C3=CC=C(C(C)(C)C)C=C3)C3=C2C=CC(C(C)(C)C)=C3)C=C1	CC1=CC=CC=C1	456
CC(C)(C)C1=CC=C(N(C2=CC=C(C(C)(C)C)C=C2)C2=CC3=C4B(C5=CC(C(C)(C)C)=CC=C5N3C3=CC=C(C(C)(C)C)C=C3)C3=C(C=CC(C(C)(C)C)=C3)N(C3=CC=C(C(C)(C)C)C=C3)C4=C2)C=C1	CC1=CC=CC=C1	456
FC(F)(F)C1=CC=C(C2=NN=C(C3=CC(C4=NN=C(C5=CC=C(C(F)(F)F)C=C5)O4)=C(N4C5=CC=CC=C5C5=C4C=CC=C5)C=C3N3C4=CC=CC=C4C4=C3C=CC=C4)O2)C=C1	CC1=CC=CC=C1	456
CC1=CC(N2C3=C(C=CC=C3)C(C)(C)C3=C2C=CC=C3)=CC(C)=C1B1C2=C(C=CC=C2)OC2=C1C=CC=C2	CC1=CC=CC=C1	457
C1=CC=C(C2=CC3=C(C=C2)N(C2=CC4=C(C=C2)N(C2=CC=C(C5=NC(C6=CC=CC=C6)=NC(C6=CC=CC=C6)=N5)C=C2)C2=C4C=C(N4C5=C(C=C(C6=CC=CC=C6)C=C5)C5=C4C=CC(C4=CC=CC=C4)=C5)C=C2)C2=C3C=C(C3=CC=CC=C3)C=C2)C=C1	CC1=CC=CC=C1	457
FC(C1=C(N2C3=C(C4=C2C=CC=C4)C=CC=C3)C=CC(C5=NC(C6=CC=CC=C6)=NC(C7=CC=CC=C7)=N5)=C1)(F)F	CC1=CC=CC=C1	457
CC(C)C1=CC(C(C)C)=C(B2C3=CC=CC=C3OC3=C2C=CC(N2C4=CC=CC=C4C4=C2C2=C(C5=C4N(C4=CC=CC=C4)C4=C5C=CC=C4)N(C4=CC=CC=C4)C4=C2C=CC=C4)=C3)C(C(C)C)=C1	CC1=CC=CC=C1	458
CC(C)(C)C1=CC=C2OC3=C4B(C2=C1)C1=C(C=CC(C(C)(C)C)=C1)OC4=CC(N1C2=C(C=CC=C2)C(C)(C)C2=C1C=CC=C2)=C3	CC1=CC=CC=C1	458
C1=CC=C(C2N=C(C3=CCCC=C3)N=C(C3=CC=C(N4C5=C(C=C(N6C7=C(C=CC=C7)C7=C6C=CC=C7)C=C5)C5=C4C=CC(N4C6=C(C=CC=C6)C6=C4C=CC=C6)=C5)C=C3)N2)C=C1	CC1=CC=CC=C1	458
C1=CC=C(C2=NC(C3=CC=CC=C3)=NC(C3=CC=C(N4C5=C(C=CC=C5)C5=C4C=CC(N4C6=C(C=CC=C6)C6=C4C=CC=C6)=C5)C=C3)=N2)C=C1	CC1=CC=CC=C1	458
C1=CC=C(N(C2=CC=CC=C2)C2=CC=C(C3=CC(C4=NC(C5=CC=CC(C6=CC=C(N(C7=CC=CC=C7)C7=CC=CC=C7)C=C6)=C5)=NC(C5=CC=CC(C6=CC=C(N(C7=CC=CC=C7)C7=CC=CC=C7)C=C6)=C5)=N4)=CC=C3)C=C2)C=C1	CC1=CC=CC=C1	458
N#CC1=C(N2C3=C(C=CC=C3)C3=C2C=CC=C3)C(N2C3=C(C=C(C4=CC=CC=C4)C=C3)C3=C2C=CC(C2=CC=CC=C2)=C3)=CC(N2C3=C(C=C(C4=CC=CC=C4)C=C3)C3=C2C=CC(C2=CC=CC=C2)=C3)=C1N1C2=C(C=CC=C2)C2=C1C=CC=C2	CC1=CC=CC=C1	458
F[B-]12OC3=CC(N4C5=C(C6=C4C=CC=C6)C=CC=C5)=CC=C3C7=CC=CC(C8=C(O2)C=C(C=C8)N9C%10=C(C%11=C9C=CC=C%11)C=CC=C%10)=[N+]71	CC1=CC=CC=C1	458
CC(C)(C1=CC2=C(N3C4=C(C(C5=CC(N6C7=C(C8=C6C=CC=C8)C=CC=C7)=CC=C53)=O)C=C(C=C24)C(C)(C)C)C=C1)C	CC1=CC=CC=C1	459
C1=CC=C(C2=NC(C3=CC=CC=C3)=NC(C3=CC=C(N4C5=C(C=CC=C5)C5=C4C=CC(C4=CC=C6C(=C4)C4=C(C=CC=C4)N6C4=CC=CC=C4)=C5)C=C3)=N2)C=C1	CC1=CC=CC=C1	459
CC1=CC=CC=C1C2=CC=C3O[B-]4(OC5=C(C6=[N+]4C(C3=C2)=CC=C6)C=C(C=C5)C7=C(C=CC=C7)C)F	CC1=CC=CC=C1	459
CC1=CC=CC=C1N(C1=CC=C(C(C)(C)C)C=C1)C1=CC=C2C=CC3=C(N(C4=CC=C(C(C)(C)C)C=C4)C4=CC=CC=C4C)C=CC4=C3C2=C1C=C4	CC1=CC=CC=C1	459
CC1(C2=CC=CC=C2N(C3=C1C=CC=C3)C4=CC=C(C=C4)S(=O)(C5=CC=C(C=C5)N6C7=CC=CC=C7C(C)(C8=C6C=CC=C8)C)=O)C	CC1=CC=CC=C1	460
CC1=CC=C2OC3=C4B(C2=C1)C1=C(C=CC(C)=C1)OC4=CC(N1C2=C(C=CC=C2)C2=C1C1=C(C4=C2N(C2=CC=CC=C2)C2=C4C=CC=C2)N(C2=CC=CC=C2)C2=C1C=CC=C2)=C3	CC1=CC=CC=C1	460
C1=CC2=C(C=C1)B1C3=C(C=CC=C3)OC3=C1C(=CC(N1C4=C(C=CC=C4)C4(C5=C1C=CC=C5)C1=C(C=CC=C1)N(C1=CC5=C6B(C7=C(C=CC=C7)OC6=C1)C1=C(C=CC=C1)O5)C1=C4C=CC=C1)=C3)O2	CC1=CC=CC=C1	460
C1(N(C2=CC3=C4B(C5=CC=CC6=C5N(C7=C6C=CC=C7)C4=C2)C8=CC=CC=C8N3C9=CC=CC=C9)C%10=CC=CC=C%10)=CC=CC=C1	CC1=CC=CC=C1	460
CC(C)(C)C1=CC2=C(C=C1)N(C1=CC=C3C(=C1)C(=O)C1=C(C=CC(N4C5=C(C=C(C(C)(C)C)C=C5)C5=C4C=CC(C(C)(C)C)=C5)=C1)N3C1=CC=CC=C1)C1=C2C=C(C(C)(C)C)C=C1	CC1=CC=CC=C1	460
CC(C)(C)C1=CC=C(N2C3=CC=CC4=C3B(C3=C2C=CC(C(C)(C)C)=C3)C2=C(C=CC(C(C)(C)C)=C2)N4C2=CC=C(C(C)(C)C)C=C2)C=C1	CC1=CC=CC=C1	460
COC1=CC2=C(C=C1)N(C1=CC=CC(N3C4=C(C=C(OC)C=C4)C4=C3C=CC(OC)=C4)=C1C#N)C1=C2C=C(OC)C=C1	CC1=CC=CC=C1	460
N(C1=CC=CC=C1)(C2=CC3=C4B(C5=CC6=C(C=C5S3)SC7=C8B6C9=C(C=CC=C9)N(C8=CC(N(C%10=CC=CC=C%10)C%11=CC=CC=C%11)=C7)C%12=CC=CC=C%12)C%13=C(C=CC=C%13)N(C4=C2)C%14=CC=CC=C%14)C%15=CC=CC=C%15	CC1=CC=CC=C1	460
O=C1C2=CC=CC=C2N2C3=C(C=CC=C13)C(=O)C1=C2C(C2=CC=C(N3C4=CC=CC=C4C4=C3C=CC=C4)C=C2)=CC=C1	CC1=CC=CC=C1	461
CC(C)(C)C1=CC2=C3B(C4=C(C=CC=C4)O2)C2=C4C(=CC=C2)C(C)(C)C2=CC=CC=C2N4C3=C1	CC1=CC=CC=C1	461
CC1(C)C2=CC(N3C4=C(C=CC=C4)C(C)(C)C4=C3C=CC=C4)=CC3=C2B2C4=C(C=CC=C41)C(C)(C)C1=C2C(=CC=C1)C3(C)C	CC1=CC=CC=C1	462
CC1(C)C2=CC=CC3=C2B2C4=C(C=CC=C4C(C)(C)C4=C2C1=CC(N1C2=C(C=CC=C2)C(C)(C)C2=C1C=CC=C2)=C4)O3	CC1=CC=CC=C1	462
O=C(C1=CC=C(C=C1)N2C3=C(C4=C2C=CC(N5C6=CC=CC=C6C7=C5C=CC=C7)=C4)C=CC=C3)C8=CC=C(C=C8)N9C%10=C(C%11=C9C=CC=C%11)C=C(N%12C%13=CC=CC=C%13C%14=C%12C=CC=C%14)C=C%10	CC1=CC=CC=C1	462
C1(N(C2=C(O3)C=CC=C2)C4=C3C=CC=C4)=CC=C(C=C1)C5=NN=C(N5C6=CC=CC=C6)C7=CC=C(N(C8=C(O9)C=CC=C8)C%10=C9C=CC=C%10)C=C7	CC1=CC=CC=C1	462
CC(C)(C)C1=CC2=C3B(C4=C(C=CC=C4)O2)C2=C4C(=CC=C2)C(C2=CC=CC=C2)(C2C=CC=CC2)C2=CC=CC=C2N4C3=C1	CC1=CC=CC=C1	463
CC(C1=CC2=C(N(C3=C2C=C(C=C3)C(C)(C)C)C4=NC5=NC(N6C7=CC=C(C(C)(C)C)C=C7C8=C6C=CC(C(C)(C)C)=C8)=CC=C5C=C4)C(N9C%10=CC=C(C(C)(C)C)C=C%10C%11=C9C=CC(C(C)(C)C)=C%11)=C1)(C)C	CC1=CC=CC=C1	463
N#CC1=C(C(N2C3=C(C4=C2C=CC=C4)C=CC=C3)=C(N5C6=C(C7=C5C=CC=C7)C=CC=C6)C(N8C9=C(C%10=C8C=CC=C%10)C=CC=C9)=C1N%11C%12=C(C%13=C%11C=CC=C%13)C=CC=C%12)N%14C%15=C(C%16=C%14C=CC=C%16)C=CC=C%15	CC1=CC=CC=C1	464
CC(C)(C)C1=CC2=C(C=C1)OC1=C3B2C2=CC=C(N4C5=C(C=CC=C5)C(C)(C)C5=C4C=CC=C5)C=C2OC3=CC=C1	CC1=CC=CC=C1	464
CC1=CC(C)=C(B(C2=C(C)C=C(C)C=C2C)C2=C(C)C=C(N3C4=C(C=CC=C4)C(C)(C)C4=C3C=CC=C4)C=C2C)C(C)=C1	CC1=CC=CC=C1	464
C1=CC=C(C2=NC(C3=CC=C(N4C5=C(C=CC=C5)[Si](C5=CC=CC=C5)(C5=CC=CC=C5)C5=C4C=CC=C5)C=C3)=NC(C3=CCCC=C3)=N2)C=C1	CC1=CC=CC=C1	465
C1=CC=C(C2=NC(C3=CC=CC=C3)=NC(C3=CC=C(N4C5=C(C=C(C6=CC=C7C(=C6)C6=C(C=CC=C6)N7C6=CC=CC=C6)C=C5)C5=C4C=CC(C4=CC6=C(C=C4)N(C4=CC=CC=C4)C4=C6C=CC=C4)=C5)C=C3)=N2)C=C1	CC1=CC=CC=C1	465
CCN1C2=CC=CC=C2C3=CC4=C(C=C31)N(C5=C4C=CC=C5)C(C=C6)=CC=C6C7=NC(C8=CC=CC=C8)=NC(C9=CC=CC=C9)=N7	CC1=CC=CC=C1	465
CC1=CC2=C(C(C)=C1)N(C1=CC=C(C3=NC(C4=CC=CC=C4)=NC(C4=CC=CC=C4)=N3)C=C1)C1=C2C=C(C)C=C1C	CC1=CC=CC=C1	465
FC(F)(C1=C(C=CC(N2C3=C(SC4=C2C=CC=C4)C=CC=C3)=C1)C5=C(C=C(C=C5)N6C7=C(SC8=C6C=CC=C8)C=CC=C7)C(F)(F)F)F	CC1=CC=CC=C1	465
CC(C)(C)C1=CC2=C(C=C1)N(C3=C2C=C(C(C)(C)C)C=C3)C4=CC(C(F)(F)F)=C(C5=NC(C6=CC=CC=C6)=NC(C7=CC=CC=C7)=N5)C=C4	CC1=CC=CC=C1	466
CC(C)(C1=CC2=C(N(C3=C(C2(C)C)C=C(C=C3)C(C)(C)C)C4=CC=C(C=C4)C5=NN(N=C5C(C=C6)=CC=C6N7C8=C(C(C)(C9=C7C=CC(C(C)(C)C)=C9)C)C=C(C=C8)C(C)(C)C)C%10=CC=C(C=C%10)C#N)C=C1)C	CC1=CC=CC=C1	467
CCN1C2=CC=CC=C2C3=CC4=C(C(C5=CC=CC=C5)=C31)N(C6=C4C=CC=C6)C(C=C7)=CC=C7C8=NC(C9=CC=CC=C9)=NC(C%10=CC=CC=C%10)=N8	CC1=CC=CC=C1	467
CC1=CC(N2C3=C(C=CC=C3)C(C)(C)C3=C2C=CC=C3)=CC(C)=C1B1C2=C(C=CC=C2)CC2=C1C=CC=C2	CC1=CC=CC=C1	467
C1=CC=C(N2C3=CC=CC=C3C3=C2C2=C(C4=C3N(C3=CC=CC=C3)C3=C4C=CC=C3)N(C3=CC4=C5B(C6=C(C=CC=C6)OC5=C3)C3=C(C=CC=C3)O4)C3=C2C=CC=C3)C=C1	CC1=CC=CC=C1	467
CC(C)(C)C1=CC2=C(C=C1)N(C1=CC=C(C3=NC(C4=CC=CC=C4)=NC(C4=CC=CC=C4)=N3)C=C1)C1=C2C=C(C(C)(C)C)C=C1C1=CC2=C(C=C1)N(C1=CC=CC=C1)C1=C2C=CC=C1	CC1=CC=CC=C1	467
CC(C)(C)C1=CC=C(N2C3=CC(N4C5=C(C=CC=C5)C(C5=CC=CC=C5)(C5=CC=CC=C5)C5=C4C=CC=C5)=CC4=C3B(C3=CC(C(C)(C)C)=CC=C3N4C3=CC=C(C(C)(C)C)C=C3)C3=C2C=CC(C(C)(C)C)=C3)C=C1	CC1=CC=CC=C1	468
C1(N(C2=CC3=C4B(C5=CC=C(C6=C5N(C7=C6C=CC=C7)C4=C2)N(C8=CC=CC=C8)C9=CC=CC=C9)C%10=CC=CC=C%10N3C%11=CC=CC=C%11)C%12=CC=CC=C%12)=CC=CC=C1	CC1=CC=CC=C1	468
CC(C)(C)C1=CC=C(N(C2=CC=C(C(C)(C)C)C=C2)C2=CC3=C4B(C5=CC(C(C)(C)C)=CC=C5N3C3=CC=C(C(C)(C)C)C=C3)C3=CC=CC5=C3N(C4=C2)C2=C(C=CC=C2)C5(C)C)C=C1	CC1=CC=CC=C1	468
C1=CC=C(N2C3=CC=CC=C3B3C4=CC=CC5=C4N(C4=CC=CC2=C34)C2=C5C=CC=C2)C=C1	CC1=CC=CC=C1	469
BrC1=CC(C2=CC=C(N3C4=C(C=CC=C4)OC4=C3C=CC=C4)C=C2)=C2OC3=C(C=CC=C3)B3C4=C(C=CC=C4)OC1=C32	CC1=CC=CC=C1	470
N#CC1=CC(C#N)=C(N2C3=C(C=CC=C3)C3=C2C=CC=C3)C=C1N1C2=C(C=CC=C2)C2=C1C=CC(C1=CC3=C(C=C1)N(C1=CC(N4C5=C(C=CC=C5)C5=C4C=CC=C5)=C(C#N)C=C1C#N)C1=C3C=CC=C1)=C2	CC1=CC=CC=C1	470
N#CC1=CC(C#N)=CC(N2C3=CC=C(C4=CC5=C(C=C4)N(C4=CC(C#N)=CC(C#N)=C4)C4=CC=CC=C45)C=C3C3=C2C=CC=C3)=C1	CC1=CC=CC=C1	470
CC1=CC=CC2=C1N(C3=C2C=CC=C3)C4=CC(N5C6=C(C7=C5C(C)=CC=C7)C=CC=C6)=C(C=C4C#N)C#N	CC1=CC=CC=C1	470
CC1=CC2=C(C=C1)N(C3=C2C=C(C)C=C3)C4=NC(N5C6=C(C7=C5C=CC(C)=C7)C=C(C)C=C6)=CC(C8=CC(N9C%10=C(C%11=C9C=CC(C)=C%11)C=C(C)C=C%10)=NC(N(C%12=C%13C=C(C)C=C%12)C%14=C%13C=C(C)C=C%14)=C8)=C4	CC1=CC=CC=C1	470
CC1=CC(C2=CC=[N+]3C(C4=CC=CC=C4O[B-]3(F)F)=C2)=CC=C1N5C6=C(C=C(C7=CC=CC=C7)C=C6)C8=C5C=CC(C9=CC=CC=C9)=C8	CC1=CC=CC=C1	471
CC1=CC=C(S(=O)(=O)C2=CC(N3C4=C(C=C(C(C)(C)C)C=C4)C4=C3C=CC(C(C)(C)C)=C4)=NC(N3C4=C(C=C(C(C)(C)C)C=C4)C4=C3C=CC(C(C)(C)C)=C4)=C2)C=C1	CC1=CC=CC=C1	473
N#CC1=C(C#N)C=C(N2C3=C(C=CC=C3)C3=C2C=CC=C3)C(N2C3=C(C=CC=C3)C3=C2C=CC=C3)=C1	CC1=CC=CC=C1	473
C1=CC2=C(C=C1)N(C1=CC=C3C(=C1)C1=C(C=CC=C1)N1C=CN=C31)C1=C(C=CC=C1)O2	CC1=CC=CC=C1	473
CC(C)(C1=CC2=C(C=C1)OC1=C3B2C2=CC=C(N4C5=C(C=CC=C5)C(C)(C)C5=C4C=CC=C5)C=C2OC3=CC=C1)C1=CC2=C(C=C1)OC1=CC=CC3=C1B2C1=C(C=C(N2C4=C(C=CC=C4)C(C)(C)C4=C2C=CC=C4)C=C1)O3	CC1=CC=CC=C1	474
CC(C)(C)C1=CC2=C(N(C3=C2C=C(C=C3)C(C)(C)C)C4=NC5=NC=CC=C5C=C4)C(N6C7=CC=C(C(C)(C)C)C=C7C8=C6C=CC(C(C)(C)C)=C8)=C1	CC1=CC=CC=C1	474
CC(C)C1=CC(C(C)C)=C(B2C3=CC=CC=C3OC3=C2C=CC(N2C4=C(C=CC=C4)C(C)(C)C4=C2C=CC=C4)=C3)C(C(C)C)=C1	CC1=CC=CC=C1	475
CC1(C)C2=CC=CC3=C2B2C4=C(C=CC=C4C(C)(C)C4=C2C1=CC(N1C2=C(C=CC=C2)C(C)(C)C2=C1C=CC=C2)=C4)C3	CC1=CC=CC=C1	475
C1(C2=NC(C3=CC=CC=C3)=NC(C4=CC=C(C=C4)N5C6=CC=CC=C6C(C7=CC8=C(N(C9=C8C=CC=C9)C%10=CC=CC=C%10)C=C7)(C%11=CC=CC=C%115)C%12=CC=CC=C%12)=N2)=CC=CC=C1	CC1=CC=CC=C1	475
CC(C)(C1=CC2=C(N(C3=CC=C(C=C3C(F)(F)F)C4=NC(C5=CC=CC=C5)=NC(C6=CC=CC=C6)=N4)C7=C2C=C(C=C7)C(C)(C)C)C=C1)C	CC1=CC=CC=C1	476
CC1=CC(C)=C(B(C2=C(C)C=C(C)C=C2C)C2=C(C)C=C(N3C4=C(C=CC=C4)C4=C3C=CC(N(C3=CC=CC=C3)C3=CC=CC=C3)=C4)C=C2C)C(C)=C1	CC1=CC=CC=C1	477
CC1=CC(C)=C(B(C2=C(C)C=C(C)C=C2C)C3=C(C)C=C(N4C5=C(C=CC=C5)C6=C4C=CC(N(C7=CC=CC=C7)C8=CC=CC=C8)=C6)C=C3C)C(C)=C1	CC1=CC=CC=C1	477
CC1=C(C=CC(N2C3=C(OC4=C2C=CC=C4)C=CC=C3)=C1)C5=NN(N=C5C6=CC=C(C=C6C)N7C8=C(OC9=C7C=CC=C9)C=CC=C8)C%10=CC=C(C=C%10)C#N	CC1=CC=CC=C1	477
C1=CC=C(N(C2=CC=CC=C2)C2=CC3=C(C=C2)N(C2=CC(N4C5=C(C=C(N(C6=CC=CC=C6)C6=CC=CC=C6)C=C5)C5=C4C=CC(N(C4=CC=CC=C4)C4=CC=CC=C4)=C5)=NC=N2)C2=C3C=C(N(C3=CC=CC=C3)C3=CC=CC=C3)C=C2)C=C1	CC1=CC=CC=C1	477
BrC1=CC(C2=CC=C(N3C4=C(C=CC=C4)SC4=C3C=CC=C4)C=C2)=C2OC3=C(C=CC=C3)B3C4=C(C=CC=C4)OC1=C32	CC1=CC=CC=C1	478
CC1(C)C2=C(C=CC=C2)N(C2=CC=C3B4C5=C(C=CC(C6(C7=CC8=C(C=C7)OC7=CC=CC9=C7B8C7=C(C=C(N8C%10=C(C=CC=C%10)C(C)(C)C%10=C8C=CC=C%10)C=C7)O9)C7=C(C=CC=C7)C7=C6C=CC=C7)=C5)OC5=C4C(=CC=C5)OC3=C2)C2=C1C=CC=C2	CC1=CC=CC=C1	478
The testing set
CC1=CC(C)=C(C(C)=C1)B(C2=C(C=C(C=C2C)C)C)C3=CC(N4C5=C(C6(C7=C4C=CC=C7)C8=C(C9=C6C=CC=C9)C=CC=C8)C=CC=C5)=CC(C(C)(C)C)=C3	CC1=CC=CC=C1	479
CC(C1=CC2=C(C=C1)N(C3=C(C(N4C5=C(C=C(C(C)(C)C)C=C5)C6=C4C=CC(C(C)(C)C)=C6)=C(N7C8=C(C=C(C(C)(C)C)C=C8)C9=C7C=CC(C(C)(C)C)=C9)C(C#N)=C3N%10C%11=C(C=C(C(C)(C)C)C=C%11)C%12=C%10C=CC(C(C)(C)C)=C%12)N%13C%14=C(C=C(C(C)(C)C)C=C%14)C%15=C%13C=CC(C(C)(C)C)=C%15)C%16=C2C=C(C(C)(C)C)C=C%16)(C)C	CC1=CC=CC=C1	480
O=C(C(C=C1)=CC=C1N2C(C=CC=C3)=C3C(C=C4)=C2C5=C4C(C=CC=C6)=C6N5C7=CC=CC=C7)C8=CC=CC=C8	CC1=CC=CC=C1	480
CC1=CC(N2C3=C(C=CC=C3)C(C3=CC=CC=C3)(C3=CC=CC=C3)C3=C2C=CC=C3)=CC(C)=C1B1C2=C(C=CC=C2)CC2=C1C=CC=C2	CC1=CC=CC=C1	480
C1=CC2=C(C=C1)N1C(=N2)C2=CC=C(N3C4=C(C=CC=C4)OC4=C3C=CC=C4)C=C2C2=C1C=CC=C2	CC1=CC=CC=C1	481
CC1=CC=C(S(=O)(=O)C2=CC(N3C4=C(C=C(C5=CC=CC=C5)C=C4)C4=C3C=CC(C3=CC=CC=C3)=C4)=NC(N3C4=C(C=C(C5=CC=CC=C5)C=C4)C4=C3C=CC(C3=CC=CC=C3)=C4)=C2)C=C1	CC1=CC=CC=C1	482
CC1=CC=CC=C1C1=NC(C2=CC=CC=C2C)=NC(C2=C(C)C=C(N3C4=C(C=CC=C4)C(C)(C)C4=C3C=CC=C4)C=C2C)=N1	CC1=CC=CC=C1	482
O=C(C1=CC=CC=C1O2)C(C=C3N4C5=C(C6=C4C=CC(C(C)(C)C)=C6)C=C(C(C)(C)C)C=C5)=C2C=C3N(C7=C8C=C(OC)C=C7)C9=C8C=CC=C9	CC1=CC=CC=C1	482
CC1=CC(C)=C(B(C2=CC=C(N3C4=C(C=CC=C4)C(C)(C)C4=C3C=CC=C4)C=C2)C2=C(C)C=C(C)C=C2C)C=C1	CC1=CC=CC=C1	484
CC1(C2=C(N(C3=C1C=C(N(C4=C(C5=C6)C=C(C=C4)N7C8=CC=C(C=C8C9=C7C=CC(C(C)(C)C)=C9)C(C)(C)C)C5=CC=C6N%10C(C=CC(C(C)(C)C)=C%11)=C%11C%12=CC(C(C)(C)C)=CC=C%12%10)C=C3)C%13=CC=C(C=C%13)S(=O)(C%14=CC=C(C=C%14)N%15C%16=C(C(C)(C%17=C%15C=CC(N(C%18=C(C%19=C%20)C=C(C=C%18)N%21C%22=CC=C(C=C%22C%23=C%21C=CC(C(C)(C)C)=C%23)C(C)(C)C)C%19=CC=C%20N%24C(C=CC(C(C)(C)C)=C%25)=C%25C%26=CC(C(C)(C)C)=CC=C%26%24)=C%17)C)…	CC1=CC=CC=C1	484
CC1=CC(N2C3=C(C=CC=C3)C(C)(C)C3=C2C=CC=C3)=CC(C)=C1C1=NC(C2=CC=CC=C2)=NC(C2=CC=CC=C2)=N1	CC1=CC=CC=C1	484
N#CC1=C(C#N)C=C(N2C3=C(C=CC=C3)C3=C2C=CC=C3)C(N2C3=C(C=CC=C3)C3=C2C=CC=C3)=C1	CC1=CC=CC=C1	484
N#CC1=CC=CC(C#N)=C1N1C2=CC=C(C3=CC4=C(C=C3)N(C3=C(C#N)C=CC=C3C#N)C3=CC=CC=C34)C=C2C2=C1C=CC=C2	CC1=CC=CC=C1	488
CC1=CC=CC(C)=C1C1=NC(C2=C(C)C=CC=C2C)=NC(C2=C(C)C=C(N3C4=C(C=CC=C4)C(C)(C)C4=C3C=CC=C4)C=C2C)=N1	CC1=CC=CC=C1	488
COC1=CC2=C(C=C1)N(C1=CC3=C(C=C1)SC1=C3C=C(N3C4=C(C=C(OC)C=C4)C(C)(C)C4=C3C=CC(OC)=C4)C=C1)C1=C(C=C(OC)C=C1)C2(C)C	CC1=CC=CC=C1	488
CC1(C)C2=C(C=CC=C2)N(C2=CC3=C(C=C2)C2=C(N=CC=N2)C2=C3C=C(N3C4=C(C=CC=C4)C(C)(C)C4=C3C=CC=C4)C=C2)C2=C1C=CC=C2	CC1=CC=CC=C1	490
C1(C2=NC(C3=CC=CC=C3)=NC(C4=CC=C(C=C4)N5C6=CC=CC=C6C(C7=C8OC9=C(C8=CC=C7)C=CC=C9)(C%10=CC=CC=C%105)C%11=CC=CC=C%11)=N2)=CC=CC=C1	CC1=CC=CC=C1	492
CC1=CC=CC=C1C1=NC(C2=CC=CC=C2)=NC(C2=CC=C(N3C4=C(C=CC=C4)C(C)(C)C4=C3C=CC=C4)C=C2C)=N1	CC1=CC=CC=C1	494
CC1=CC(C)=C(B(C2=C(C)C=C(C)C=C2C)C2=C(C)C=C(N3C4=C(C=C(N(C5=CC=CC=C5)C5=CC=CC=C5)C=C4)C4=C3C=CC(N(C3=CC=CC=C3)C3=CC=CC=C3)=C4)C=C2C)C(C)=C1	CC1=CC=CC=C1	495
C1=CC=C(C2=CC=C(C3=NC(N4C5=C(C=CC=C5)C5=C4C4=C(C=C5)C5=C(C=CC=C5)N4C4=CC=CC=C4)=NC(N4C5=C(C=CC=C5)C5=C4C4=C(C=C5)C5=C(C=CC=C5)N4C4=CC=CC=C4)=N3)C=C2)C=C1	CC1=CC=CC=C1	495
CC1=CC(C)=C(B(C2=C(C)C=C(C)C=C2C)C3=C(C)C=C(N4C5=C(C=C(C=C5)N(C6=CC=CC=C6)C7=CC=CC=C7)C8=C4C=CC(N(C9=CC=CC=C9)C%10=CC=CC=C%10)=C8)C=C3C)C(C)=C1	CC1=CC=CC=C1	495
C1(C2=NN=C(O2)C3=CC=C(N(C4=C(O5)C=CC=C4)C6=C5C=CC=C6)C=C3)=CC=CC=C1	CC1=CC=CC=C1	495
CC1=CC=C(C(=O)C2=CC(C3=CC=C(N4C5=C(C=CC=C5)C(C)(C)C5=C4C=CC=C5)C=C3)=C(C(=O)C3=CC=C(C)C=C3)C=C2C2=CC=C(N3C4=C(C=CC=C4)C(C)(C)C4=C3C=CC=C4)C=C2)C=C1	CC1=CC=CC=C1	496
CC(C)(C1=CC2=C(N3C4=C(C(C5=CC=CC(N(C6=CC=CC=C6)C7=CC=CC=C7)=C53)=O)C=C(C=C24)C(C)(C)C)C=C1)C	CC1=CC=CC=C1	496
COC1=CC2=C(C=C1)N(C1=CC3=C(C=C1N1C4=C(C=CC=C4)C4=C1C=CC=C4)C(=O)C1=CC=CC=C1O3)C1=C2C=CC=C1	CC1=CC=CC=C1	496
CC1=CC(N2C3=C(C=CC=C3)C(C)(C)C3=C2C=CC=C3)=CC=C1C1=NC(C2=CC=CC=C2)=NC(C2=CC=CC=C2)=N1	CC1=CC=CC=C1	497
CC1=CC(C)=C(C(C)=C1)B(C2=C(C=C(C=C2C)C)C)C3=CC(N4C5=C(C(C)(C6=C4C=CC=C6)C)C=CC=C5)=CC(C(C)(C)C)=C3	CC1=CC=CC=C1	497
CC1(C2=C(N(C3=C1C=C(N4C5=CC=C(C=C5C6=C4C=CC(C(C)(C)C)=C6)C(C)(C)C)C=C3)C7=CC=C(C=C7)S(=O)(C8=CC=C(C=C8)N9C%10=C(C(C)(C%11=C9C=CC(N%12C%13=CC=C(C=C%13C%14=C%12C=CC(C(C)(C)C)=C%14)C(C)(C)C)=C%11)C)C=C(N%15C%16=CC=C(C=C%16C%17=C%15C=CC(C(C)(C)C)=C%17)C(C)(C)C)C=C%10)=O)C=CC(N%18C%19=CC=C(C=C%19C%20=C%18C=CC(C(C)(C)C)=C%20)C(C)(C)C)=C2)C	CC1=CC=CC=C1	498
CC1=CC=CC=C1C1=NC(C2=CC=C(N3C4=C(C=CC=C4)C(C)(C)C4=C3C=CC=C4)C=C2)=NC(C2=CC=CC=C2C)=N1	CC1=CC=CC=C1	498
F[B-]12OC3=CC=C(N4C5=C(C=CC=C5)C6=C4C=CC=C6)C=C3C7=CC=CC(C8=C(C=CC(N9C%10=C(C=CC=C%10)C%11=C9C=CC=C%11)=C8)O2)=[N+]71	CC1=CC=CC=C1	498
CC1(C)C2=C(C=CC=C2)N(C2=CC=C(C3=NC(C4=CC=CC=C4)=NC(C4=CC=CC=C4)=N3)C=C2)C2=C1C=CC=C2	CC1=CC=CC=C1	499
C12=C(N(C3=C(O2)C=CC=C3)C4=CC=C(C=C4)C5=NN=C(O5)C6=CC=C(N(C7=C(O8)C=CC=C7)C9=C8C=CC=C9)C=C6)C=CC=C1	CC1=CC=CC=C1	502
CC1(C)C2=C(C=CC=C2)N(C2=CC3=C(C=C2)C2=C(C=C(N4C5=C(C=CC=C5)C(C)(C)C5=C4C=CC=C5)C=C2)C2=C3N=CC=N2)C2=C1C=CC=C2	CC1=CC=CC=C1	503
O=C(C1=CC=C(C=C1N2C3=CC=CC=C3)N4C5=C(C(C)(C6=C4C=CC=C6)C)C=CC=C5)C(C=C7)=C2C=C7N8C9=CC=CC=C9C(C)(C)C%10=CC=CC=C8%10	CC1=CC=CC=C1	504
CC(C)(C1=CC2=C(N(C3=C2C=C(C=C3)C(C)(C)C)C4=CC5=C(C6=NC7=C(F)C=CC=C7N=C6C8=C5C=C(C=C8)N9C%10=C(C%11=C9C=CC(C(C)(C)C)=C%11)C=C(C=C%10)C(C)(C)C)C=C4)C=C1)C	CC1=CC=CC=C1	505
CC1=CC2=C3B(C4=C(N2C5=CC=C(C=C5)C(C)(C)C)C=CC(C(C)(C)C)=C4)C6=C(N(C3=C1)C7=CC=C(C=C7)C(C)(C)C)C=CC(C(C)(C)C)=C6	CC1=CC2=C(C=C1)C(C1=CC3=C(C=CC=C3)C=C1)=C1C=CC=CC1=C2C1=CC2=C(C=CC=C2)C=C1	461
CC1=CC(C)=C(C=C1)N(C2=C3C=CC4=C5C(C=CC(C=C2)=C35)=C(C=C4)N(C6=C(C=CC(C(C)(C)C)=C6)C)C7=C(C=C(C=C7)C)C)C8=C(C=CC(C(C)(C)C)=C8)C	CC1=CC2=C(C=C1)C(C1=CC3=C(C=CC=C3)C=C1)=C1C=CC=CC1=C2C1=CC2=C(C=CC=C2)C=C1	465
CC(C)(C)C1=CC=C2C(=C1)C1=C(C=CC(C(C)(C)C)=C1)N2C1=CC=C(S(=O)(=O)C2=CC=C(N3C4=CC=C(C(C)(C)C)C=C4C4=C3C=CC(C(C)(C)C)=C4)C=C2)C=C1	CCCCCC	369
CC(C)(C)C1=CC=C2C(=C1)C1=C(C=CC(C(C)(C)C)=C1)N2C1=CC=C(S(=O)(=O)C2=CC=CC=C2)C=C1	CCCCCC	377
CCCCCCC1(CCCCCC)C2=CC(C3=CC=C4C(=C3)C3=C(C=CC(C5=CC6=C(C=C5)C5=C(C=CC=C5)C6(CCCCCC)CCCCCC)=C3)S4(=O)=O)=CC=C2C2=C1C=CC=C2	CCCCCC	378
CC(C)(C)C1=CC=C2C(=C1)C1=C(C=CC(C(C)(C)C)=C1)N2C1=CC=C(S(=O)(=O)C2=CC(N3C4=CC=C(C(C)(C)C)C=C4C4=C3C=CC(C(C)(C)C)=C4)=CC=C2)C=C1	CCCCCC	379
CC(C)(C)C1=CC=C2C(=C1)C1=C(C=CC(C(C)(C)C)=C1)N2C1=CC=CC(S(=O)(=O)C2=CC=CC=C2)=C1	CCCCCC	389
CCCCC(CC)CN1C2=CC=C(C3=CC=C4C(=C3)C3=C(C=CC(C5=CC6=C(C=C5)N(CC(CC)CCCC)C5=C6C=CC=C5)=C3)S4(=O)=O)C=C2C2=C1C=CC=C2	CCCCCC	392
CC(C)(C)C1=CC=C2C(=C1)C1=C(C=CC(C(C)(C)C)=C1)N2C1=CC(S(=O)(=O)C2=CC=CC(N3C4=CC=C(C(C)(C)C)C=C4C4=C3C=CC(C(C)(C)C)=C4)=C2)=CC=C1	CCCCCC	393
CCCCCCC1(CCCCCC)C2=CC(C3=CC4=C(C=C3)C3=CC=C(C5=CC6=C(C=C5)C5=C(C=CC=C5)C6(CCCCCC)CCCCCC)C=C3S4(=O)=O)=CC=C2C2=C1C=CC=C2	CCCCCC	405
C1=CC=C(N2C3=CC=C(C4=CC(C5=NC(C6=CC=CC(C7=CC=C8C(=C7)C7=C(C=CC=C7)N8C7=CC=CC=C7)=C6)=NC(C6=CC=CC(C7=CC8=C(C=C7)N(C7=CC=CC=C7)C7=CC=CC=C78)=C6)=N5)=CC=C4)C=C3C3=C2C=CC=C3)C=C1	CCCCCC	407
CCCCC(C)CN1C2=CC=C(C3=CC=C4C(=C3)S(=O)(=O)C3=C4C=CC(C4=CC5=C(C=C4)N(CC(C)CCCC)C4=C5C=CC=C4)=C3)C=C2C2=C1C=CC=C2	CCCCCC	410
CC(C)(C)C1=CC2=C(C=C1)N(C1=CC=C3C(=C1)C1=C(C=CC(N4C5=C(C=C(C(C)(C)C)C=C5)C5=C4C=CC(C(C)(C)C)=C5)=C1)S3(=O)=O)C1=C2C=C(C(C)(C)C)C=C1	CCCCCC	410
C1=CC=C(N(C2=CC=CC=C2)C2=CC=C(C3=CC(C4=NC(C5=CC=CC(C6=CC=C(N(C7=CC=CC=C7)C7=CC=CC=C7)C=C6)=C5)=NC(C5=CC=CC(C6=CC=C(N(C7=CC=CC=C7)C7=CC=CC=C7)C=C6)=C5)=N4)=CC=C3)C=C2)C=C1	CCCCCC	414
CCCCC(CC)CN1C2=CC(C3=CC4=C(C=C3)C3=CC=C(C5=CC6=C(C=C5)C5=C(C=CC=C5)N6CC(CC)CCCC)C=C3S4(=O)=O)=CC=C2C2=C1C=CC=C2	CCCCCC	414
CC(C)(C)C1=CC2=C(C=C1)N(C1=CC=C3C(=C1)S(=O)(=O)C1=C3C=CC(N3C4=C(C=C(C(C)(C)C)C=C4)C4=C3C=CC(C(C)(C)C)=C4)=C1)C1=C2C=C(C(C)(C)C)C=C1	CCCCCC	420
CCCCC1=CC=C(N(C2=CC=C(CCCC)C=C2)C2=CC=C3C(=C2)C2=C(C=CC(N(C4=CC=C(CCCC)C=C4)C4=CC=C(CCCC)C=C4)=C2)S3(=O)=O)C=C1	CCCCCC	430
CCCCC(C=C1)=CC=C1N(C2=CC3=C(C4=CC=C(C=C4S3(=O)=O)N(C5=CC=C(C=C5)CCCC)C6=CC=C(C=C6)CCCC)C=C2)C7=CC=C(CCCC)C=C7	CCCCCC	460
N#CC1=CC(C2=CC3=C(C=C2)N(C2=CC=CC=C2)C2=CC=CC=C23)=CC=C1	CN(C)C=O	412
C1=CC=C(N(C2=CC=CC=C2)C2=CC=C(C3=CC(C4=NC(C5=CC=CC(C6=CC=C(N(C7=CC=CC=C7)C7=CC=CC=C7)C=C6)=C5)=NC(C5=CC=CC(C6=CC=C(N(C7=CC=CC=C7)C7=CC=CC=C7)C=C6)=C5)=N4)=CC=C3)C=C2)C=C1	CN(C)C=O	439
CC1(C)C2=C(C=CC=C2)N(C2=CC(C(F)(F)F)=C(C3=C(C(F)(F)F)C=C(N4C5=C(C=CC=C5)C(C)(C)C5=C4C=CC=C5)C=C3)C=C2)C2=C1C=CC=C2	CN(C)C=O	441
CC(C)(C)C1=CC=C2C(=C1)C1=C(C=CC(C(C)(C)C)=C1)N2C1=CC=C(S(=O)(=O)C2=CC=CC=C2)C=C1	CN(C)C=O	453
CC(C)(C1=CC2=C(N(C3=C2C=C(C=C3)C(C)(C)C)C4=CC(C(F)(F)F)=C(C=C4)C5=C(C=C(C=C5)N6C7=C(C8=C6C=CC(C(C)(C)C)=C8)C=C(C=C7)C(C)(C)C)C(F)(F)F)C=C1)C	CN(C)C=O	454
N#CC1=CC(C2=CCC(N(C3=CC=CC=C3)C3=CC=CC=C3)C=C2)=CC=C1	CN(C)C=O	460
CC(C)(C)C1=CC=C2C(=C1)C1=C(C=CC(C(C)(C)C)=C1)N2C1=CC=C(S(=O)(=O)C2=CC=C(N3C4=CC=C(C(C)(C)C)C=C4C4=C3C=CC(C(C)(C)C)=C4)C=C2)C=C1	CN(C)C=O	460
CC(C)(C)C1=CC=C2C(=C1)C1=C(C=CC(C(C)(C)C)=C1)N2C1=CC=CC(S(=O)(=O)C2=CC=CC=C2)=C1	CN(C)C=O	462
CC(C)(C)C1=CC=C2C(=C1)C1=C(C=CC(C(C)(C)C)=C1)N2C1=CC=C(S(=O)(=O)C2=CC(N3C4=CC=C(C(C)(C)C)C=C4C4=C3C=CC(C(C)(C)C)=C4)=CC=C2)C=C1	CN(C)C=O	462
CC(C)(C)C1=CC=C2C(=C1)C1=C(C=CC(C(C)(C)C)=C1)N2C1=CC(S(=O)(=O)C2=CC=CC(N3C4=CC=C(C(C)(C)C)C=C4C4=C3C=CC(C(C)(C)C)=C4)=C2)=CC=C1	CN(C)C=O	470
FC(F)(C1=C(C=CC(N2C3=C(SC4=C2C=CC=C4)C=CC=C3)=C1)C5=C(C=C(C=C5)N6C7=C(SC8=C6C=CC=C8)C=CC=C7)C(F)(F)F)F	CN(C)C=O	471
N#CC1=CC(C2=CC3=C(C=C2)N(C2=CC=CC=C2)C2=CC=CC=C23)=CC=C1	CO	424
N#CC1=CC(C2=CCC(N(C3=CC=CC=C3)C3=CC=CC=C3)C=C2)=CC=C1	CO	461
CC(C)(C)C1=CC=C2C(=C1)C1=C(C=CC(C(C)(C)C)=C1)N2C1=CC=C(S(=O)(=O)C2=CC=CC=C2)C=C1	CO	474
CC(C)(C)C1=CC=C2C(=C1)C1=C(C=CC(C(C)(C)C)=C1)N2C1=CC=C(S(=O)(=O)C2=CC=C(N3C4=CC=C(C(C)(C)C)C=C4C4=C3C=CC(C(C)(C)C)=C4)C=C2)C=C1	CO	475
CC(C)(C)C1=CC=C2C(=C1)C1=C(C=CC(C(C)(C)C)=C1)N2C1=CC=C(S(=O)(=O)C2=CC(N3C4=CC=C(C(C)(C)C)C=C4C4=C3C=CC(C(C)(C)C)=C4)=CC=C2)C=C1	CO	477
C1=CC=C(N2C3=CC=C(C4=CC(C5=NC(C6=CC=CC(C7=CC=C8C(=C7)C7=C(C=CC=C7)N8C7=CC=CC=C7)=C6)=NC(C6=CC=CC(C7=CC8=C(C=C7)N(C7=CC=CC=C7)C7=CC=CC=C78)=C6)=N5)=CC=C4)C=C3C3=C2C=CC=C3)C=C1	CO	479
CC(C)(C)C1=CC=C2C(=C1)C1=C(C=CC(C(C)(C)C)=C1)N2C1=CC=CC(S(=O)(=O)C2=CC=CC=C2)=C1	CO	479
CC(C)(C)C1=CC=C2C(=C1)C1=C(C=CC(C(C)(C)C)=C1)N2C1=CC(S(=O)(=O)C2=CC=CC(N3C4=CC=C(C(C)(C)C)C=C4C4=C3C=CC(C(C)(C)C)=C4)=C2)=CC=C1	CO	484
COC1=CC2=C(C=C1)N(C1=CC3=C(C=C1N1C4=C(C=CC=C4)C4=C1C=CC=C4)C(=O)C1=CC=CC=C1O3)C1=C2C=CC=C1	COC1=CC2=C(C=C1)N(C1=CC3=C(C=C1N1C4=C(C=CC=C4)C4=C1C=CC=C4)C(=O)C1=CC=CC=C1O3)C1=C2C=CC=C1	476
FC(C1=C(N2C3=C(C=CC=C3)C4=C2C=CC=C4)C(N5C6=C(C=CC=C6)C7=C5C=CC=C7)=C(N8C9=C(C=CC=C9)C%10=C8C=CC=C%10)C(N%11C%12=C(C=CC=C%12)C%13=C%11C=CC=C%13)=C1N%14C%15=C(C=CC=C%15)C%16=C%14C=CC=C%16)(F)F	FC(C1=C(N2C3=C(C=CC=C3)C4=C2C=CC=C4)C(N5C6=C(C=CC=C6)C7=C5C=CC=C7)=C(N8C9=C(C=CC=C9)C%10=C8C=CC=C%10)C(N%11C%12=C(C=CC=C%12)C%13=C%11C=CC=C%13)=C1N%14C%15=C(C=CC=C%15)C%16=C%14C=CC=C%16)(F)F	495
FC(F)(C1=C(C(N2C3=C(C4=C2C=CC=C4)C=CC=C3)=CC(N5C6=C(C7=C5C=CC=C7)C=CC=C6)=C1N8C9=C(C%10=C8C=CC=C%10)C=CC=C9)N%11C%12=C(C%13=C%11C=CC=C%13)C=CC=C%12)F	FC(F)(C1=C(C(N2C3=C(C4=C2C=CC=C4)C=CC=C3)=CC(N5C6=C(C7=C5C=CC=C7)C=CC=C6)=C1N8C9=C(C%10=C8C=CC=C%10)C=CC=C9)N%11C%12=C(C%13=C%11C=CC=C%13)C=CC=C%12)F	445
C1(C2=NC(C3=CC=CC=C3)=NC(C4=CC=CC=C4)=N2)=CC(C5=CC=CC=C5)=C(N6C7=CC=C(N8C9=C(C%10=C8C=CC=C%10)C=CC=C9)C=C7C%11=C6C=CC=C%11)C=C1	N#CC1=C(C(C2=CC3=C(OC4=C3C=C(C)C=C4)C=C2)=CC=C1)N5C6=C(C7=C5C=CC=C7)C=CC=C6	466
N#CC1=C(C2=CC=C(N3C4=C(C=CC=C4)C4=C3C=CC=C4)C=C2)C=CC=C1OC1=CC(C2=CC=C(N3C4=C(C=CC=C4)C4=C3C=CC=C4)C=C2)=CC=C1	N#CC1=C(C2=CC=C(N3C4=C(C=CC=C4)C4=C3C=CC=C4)C=C2)C=CC=C1OC1=CC(C2=CC=C(N3C4=C(C=CC=C4)C4=C3C=CC=C4)C=C2)=CC=C1	415
N#CC1=C(C2=CC=C(N3C4=C(C=CC=C4)C4=C3C=CC=C4)C=C2)C=CC=C1OC1=CC=CC=C1	N#CC1=C(C2=CC=C(N3C4=C(C=CC=C4)C4=C3C=CC=C4)C=C2)C=CC=C1OC1=CC=CC=C1	415
N#CC1=CC=C(C=C1)C2=C3C=CC=CC3=C(C4=C2C=CC=C4)C5=CC=CC(C6=NC(C7=C(C8=C9C=CC=C8)C=CC=C7)=C9O6)=C5	N#CC1=CC=C(C=C1)C2=C3C=CC=CC3=C(C4=C2C=CC=C4)C5=CC=CC(C6=NC(C7=C(C8=C9C=CC=C8)C=CC=C7)=C9O6)=C5	451
N#CC1=CC=C(C2=C3C=CC=CC3=C(C3=CC=C(C4=NC5=C(O4)C4=C(C=CC=C4)C4=C5C=CC=C4)C=C3)C3=C2C=CC=C3)C=C1	N#CC1=CC=C(C2=C3C=CC=CC3=C(C3=CC=C(C4=NC5=C(O4)C4=C(C=CC=C4)C4=C5C=CC=C4)C=C3)C3=C2C=CC=C3)C=C1	460
C1(C2=NC(C3=CC=CC=C3)=NC(C4=CC=CC=C4)=N2)=CC(C5=CC=CC=C5)=C(N6C7=CC=C(N8C9=C(C%10=C8C=CC=C%10)C=CC=C9)C=C7C%11=C6C=CC=C%11)C=C1	N#CC1=CC=CC(C2=CC(N3C4=C(C5=C3C=CC(C)=C5)C=C(C)C=C4)=CC=C2)=C1N6C7=C(C8=C6C=CC=C8)C=CC=C7	470
O=C(C(C=C1)=CC=C1N2C(C=CC=C3)=C3C(C=C4)=C2C5=C4C(C=CC=C6)=C6N5C7=CC=CC=C7)C8=CC=CC=C8	O=C(C(C=C1)=CC=C1N2C(C=CC=C3)=C3C(C=C4)=C2C5=C4C(C=CC=C6)=C6N5C7=CC=CC=C7)C8=CC=CC=C8	481
O=C(C1=CC=CC=C1)C2=CC=CC(C3=CC4=C(N(C5=C4C=CC=C5)C6=CC=CC=C6)C=C3)=C2	O=C(C1=CC=CC=C1)C2=CC=CC(C3=CC4=C(N(C5=C4C=CC=C5)C6=CC=CC=C6)C=C3)=C2	447
O=C(C1=CC=CC=C1O2)C(C=C3N4C5=C(C6=C4C=CC(C(C)(C)C)=C6)C=C(C(C)(C)C)C=C5)=C2C=C3N(C7=C8C=C(OC)C=C7)C9=C8C=CC=C9	O=C(C1=CC=CC=C1O2)C(C=C3N4C5=C(C6=C4C=CC(C(C)(C)C)=C6)C=C(C(C)(C)C)C=C5)=C2C=C3N(C7=C8C=C(OC)C=C7)C9=C8C=CC=C9	480
F[B-]1(OC2=CC(C3=CC=CC=C3C)=CC=C2C4=CC=CC5=[N+]14)OC6=C5C=CC(C7=C(C=CC=C7)C)=C6	O=P(C1=CC=CC=C1)(C1=CC=CC=C1)C1=CC=C(C(C2=CC=C(P(=O)(C3=CC=CC=C3)C3=CC=CC=C3)C=C2)(C(F)(F)F)C(F)(F)F)C=C1	457
CC1=CC=CC=C1C2=CC=C3O[B-]4(OC5=C(C6=[N+]4C(C3=C2)=CC=C6)C=C(C=C5)C7=C(C=CC=C7)C)F	O=P(C1=CC=CC=C1)(C1=CC=CC=C1)C1=CC=C(C(C2=CC=C(P(=O)(C3=CC=CC=C3)C3=CC=CC=C3)C=C2)(C(F)(F)F)C(F)(F)F)C=C1	463
F[B-]12OC3=CC(N4C5=C(C6=C4C=CC=C6)C=CC=C5)=CC=C3C7=CC=CC(C8=C(O2)C=C(C=C8)N9C%10=C(C%11=C9C=CC=C%11)C=CC=C%10)=[N+]71	O=P(C1=CC=CC=C1)(C1=CC=CC=C1)C1=CC=C(C(C2=CC=C(P(=O)(C3=CC=CC=C3)C3=CC=CC=C3)C=C2)(C(F)(F)F)C(F)(F)F)C=C1	478
F[B-]12OC3=CC=C(N4C5=C(C=CC=C5)C6=C4C=CC=C6)C=C3C7=CC=CC(C8=C(C=CC(N9C%10=C(C=CC=C%10)C%11=C9C=CC=C%11)=C8)O2)=[N+]71	O=P(C1=CC=CC=C1)(C1=CC=CC=C1)C1=CC=C(C(C2=CC=C(P(=O)(C3=CC=CC=C3)C3=CC=CC=C3)C=C2)(C(F)(F)F)C(F)(F)F)C=C1	503
CC1=CC(N2C3=C(C=CC=C3)C(C)(C)C3=C2C=CC=C3)=CC(C)=C1B1C2=C(C=CC=C2)OC2=C1C=CC=C2	O=P(C1=CC=CC=C1)(C1=CC=CC=C1)C1=CC=CC=C1OC1=C(P(=O)(C2=CC=CC=C2)C2=CC=CC=C2)C=CC=C1	464
CC1(C)C2=CC=CC3=C2B2C4=C(C=CC=C4C(C)(C)C4=C2C1=CC(N1C2=C(C=CC=C2)C(C)(C)C2=C1C=CC=C2)=C4)O3	O=P(C1=CC=CC=C1)(C1=CC=CC=C1)C1=CC=CC=C1OC1=C(P(=O)(C2=CC=CC=C2)C2=CC=CC=C2)C=CC=C1	466
CC1(C)C2=CC(N3C4=C(C=CC=C4)C(C)(C)C4=C3C=CC=C4)=CC3=C2B2C4=C(C=CC=C41)C(C)(C)C1=C2C(=CC=C1)C3(C)C	O=P(C1=CC=CC=C1)(C1=CC=CC=C1)C1=CC=CC=C1OC1=C(P(=O)(C2=CC=CC=C2)C2=CC=CC=C2)C=CC=C1	469
CC1(C)C2=CC=CC3=C2B2C4=C(C=CC=C4C(C)(C)C4=C2C1=CC(N1C2=C(C=CC=C2)C(C)(C)C2=C1C=CC=C2)=C4)C3	O=P(C1=CC=CC=C1)(C1=CC=CC=C1)C1=CC=CC=C1OC1=C(P(=O)(C2=CC=CC=C2)C2=CC=CC=C2)C=CC=C1	470
CC1=NC(C2=CC=C(N3C4=C(C=CC=C4)C(C)(C)C4=C3C=CC=C4)C=C2)=CC(C2=CC=C(N3C4=C(C=CC=C4)C(C)(C)C4=C3C=CC=C4)C=C2)=N1	O=P(C1=CC=CC=C1)(C1=CC=CC=C1)C1=CC=CC=C1OC1=C(P(=O)(C2=CC=CC=C2)C2=CC=CC=C2)C=CC=C1	489
CC1(C)C2=C(C=CC=C2)N(C2=CC=C(C3=CC(C4=CC=C(N5C6=C(C=CC=C6)C(C)(C)C6=C5C=CC=C6)C=C4)=NC=N3)C=C2)C2=C1C=CC=C2	O=P(C1=CC=CC=C1)(C1=CC=CC=C1)C1=CC=CC=C1OC1=C(P(=O)(C2=CC=CC=C2)C2=CC=CC=C2)C=CC=C1	498
CC1(C)C2=C(C=CC=C2)N(C3=CC=C(C4=CC(C5=CC=C(N6C7=C(C=CC=C7)C(C8=C6C=CC=C8)(C)C)C=C5)=NC(C9=CC=CC=C9)=N4)C=C3)C%10=C1C=CC=C%10	O=P(C1=CC=CC=C1)(C1=CC=CC=C1)C1=CC=CC=C1OC1=C(P(=O)(C2=CC=CC=C2)C2=CC=CC=C2)C=CC=C1	498
O=S(=O)(C1=CC=C(N2C3=CC=CC=C3C3(C4=C(C=CC=C4)C4=C3C=CC=C4)C3=C2C=CC=C3)C=C1)C1=CC=C(N2C3=CC=CC=C3C3(C4=C(C=CC=C4)C4=C3C=CC=C4)C3=C2C=CC=C3)C=C1	O=S(=O)(C1=CC=C(N2C3=CC=CC=C3C3(C4=C(C=CC=C4)C4=C3C=CC=C4)C3=C2C=CC=C3)C=C1)C1=CC=C(N2C3=CC=CC=C3C3(C4=C(C=CC=C4)C4=C3C=CC=C4)C3=C2C=CC=C3)C=C1	447
O=S(C(C=C1)=CC=C1N2C(C=CC=C3)=C3C(C=C4)=C2C5=C4C(C=CC=C6)=C6N5C7=CC=CC=C7)(C8=CC=CC=C8)=O	O=S(C(C=C1)=CC=C1N2C(C=CC=C3)=C3C(C=C4)=C2C5=C4C(C=CC=C6)=C6N5C7=CC=CC=C7)(C8=CC=CC=C8)=O	438
O=S(C1=C2C=CC=C1C(C=C3)=CC4=C3N(C5=CC=CC=C5)C6=C4C=CC=C6)(C7=C2C=CC=C7)=O	O=S(C1=C2C=CC=C1C(C=C3)=CC4=C3N(C5=CC=CC=C5)C6=C4C=CC=C6)(C7=C2C=CC=C7)=O	438
O=S(C1=CC=C(C=C1)N2C3=CC=CC=C3C4(C5=C2C=CC=C5)C6=C(OC7=C4C=CC=C7)C=CC=C6)(C8=CC=C(C=C8)N9C%10=CC=CC=C%10C%11(C%12=C9C=CC=C%12)C%13=C(OC%14=C%11C=CC=C%14)C=CC=C%13)=O	O=S(C1=CC=C(C=C1)N2C3=CC=CC=C3C4(C5=C2C=CC=C5)C6=C(OC7=C4C=CC=C7)C=CC=C6)(C8=CC=C(C=C8)N9C%10=CC=CC=C%10C%11(C%12=C9C=CC=C%12)C%13=C(OC%14=C%11C=CC=C%14)C=CC=C%13)=O	442
O=S(C1=CC=CC(C2=CC3=C(N(C4=C3C=CC=C4)C5=CC=CC=C5)C=C2)=C1)(C6=CC=CC=C6)=O	O=S(C1=CC=CC(C2=CC3=C(N(C4=C3C=CC=C4)C5=CC=CC=C5)C=C2)=C1)(C6=CC=CC=C6)=O	416

## Sheet: PLQY
416 PLQY values as the training set and 82 ones as the
independent testing set for the transfer learning on the blue OLED emitters
Emitters	Solvents	Labels
The training set
O=S(C1=CC=CC(C2=CC3=C(N(C4=C3C=CC=C4)C5=CC=CC=C5)C=C2)=C1)(C6=CC=CC=C6)=O	O=S(C1=CC=CC(C2=CC3=C(N(C4=C3C=CC=C4)C5=CC=CC=C5)C=C2)=C1)(C6=CC=CC=C6)=O	0.402
O=S(C1=C2C=CC=C1C(C=C3)=CC4=C3N(C5=CC=CC=C5)C6=C4C=CC=C6)(C7=C2C=CC=C7)=O	O=S(C1=C2C=CC=C1C(C=C3)=CC4=C3N(C5=CC=CC=C5)C6=C4C=CC=C6)(C7=C2C=CC=C7)=O	0.592
O=C1C2=CC=CC=C2S(=O)(=O)C2=C1C=C(N1C3=C(C=CC=C3)C3=C1C=CC=C3)C=C2	O=C1C2=CC=CC=C2S(=O)(=O)C2=C1C=C(N1C3=C(C=CC=C3)C3=C1C=CC=C3)C=C2	0.29
O=C1C2=C(C=CC=C2)C3(C4=C1C=CC(N5C6=C(C=CC=C6)C(C)(C)C7=C5C=CC=C7)=C4)C8=CC=CC=C8C9=C3C(F)=CC=C9C	O=C1C2=C(C=CC=C2)C3(C4=C1C=CC(N5C6=C(C=CC=C6)C(C)(C)C7=C5C=CC=C7)=C4)C8=CC=CC=C8C9=C3C(F)=CC=C9C	0.72
O=C(N(C1=O)CC(CCCC)CC)C2=CC=C(N3C4=CC=CC=C4OC5=C3C=CC=C5)C6=CC=CC1=C26	O=C(N(C1=O)CC(CCCC)CC)C2=CC=C(N3C4=CC=CC=C4OC5=C3C=CC=C5)C6=CC=CC1=C26	0.23
O=C(N(C1=O)CC(CCCC)CC)C2=CC=C(N3C4=CC=C(C=C4C(C)(C)C5=C3C=CC(C(C)(C)C)=C5)C(C)(C)C)C6=CC=CC1=C26	O=C(N(C1=O)CC(CCCC)CC)C2=CC=C(N3C4=CC=C(C=C4C(C)(C)C5=C3C=CC(C(C)(C)C)=C5)C(C)(C)C)C6=CC=CC1=C26	0.26
O=C(C1=CC=CC=C1)C2=CC=CC(C3=CC4=C(N(C5=C4C=CC=C5)C6=CC=CC=C6)C=C3)=C2	O=C(C1=CC=CC=C1)C2=CC=CC(C3=CC4=C(N(C5=C4C=CC=C5)C6=CC=CC=C6)C=C3)=C2	0.508
O=C(C1=CC=C(N2C3=C(C=CC=C3)OC3=C2C=CC=C3)C=C1)C1=CC=CC(C(=O)C2=CC=C(N3C4=C(C=CC=C4)OC4=C3C=CC=C4)C=C2)=C1	O=C(C1=CC=C(N2C3=C(C=CC=C3)OC3=C2C=CC=C3)C=C1)C1=CC=CC(C(=O)C2=CC=C(N3C4=C(C=CC=C4)OC4=C3C=CC=C4)C=C2)=C1	0.29
O=C(C1=CC=C(C2=CC=CC3=C12)N4C5=CC=C(C(C)(C)C)C=C5SC6=C4C=CC(C(C)(C)C)=C6)N(CC(CC)CCCC)C3=O	O=C(C1=CC=C(C2=CC=CC3=C12)N4C5=CC=C(C(C)(C)C)C=C5SC6=C4C=CC(C(C)(C)C)=C6)N(CC(CC)CCCC)C3=O	0.08
O=C(C(C=C1)=CC=C1N2C(C=CC=C3)=C3C(C=C4)=C2C5=C4C(C=CC=C6)=C6N5C7=CC=CC=C7)C8=CC=CC=C8	O=C(C(C=C1)=CC=C1N2C(C=CC=C3)=C3C(C=C4)=C2C5=C4C(C=CC=C6)=C6N5C7=CC=CC=C7)C8=CC=CC=C8	0.62
C1(C2=NC(C3=CC=CC=C3)=NC(C4=CC=CC=C4)=N2)=CC(C5=CC=CC=C5)=C(N6C7=CC=C(N8C9=C(C%10=C8C=CC=C%10)C=CC=C9)C=C7C%11=C6C=CC=C%11)C=C1	N#CC1=CC=CC(C2=CC(N3C4=C(C5=C3C=CC(C)=C5)C=C(C)C=C4)=CC=C2)=C1N6C7=C(C8=C6C=CC=C8)C=CC=C7	0.749
N#CC1=CC=C(C2=C3C=CC=CC3=C(C3=CC=C(C4=NC5=C(O4)C4=C(C=CC=C4)C4=C5C=CC=C4)C=C3)C3=C2C=CC=C3)C=C1	N#CC1=CC=C(C2=C3C=CC=CC3=C(C3=CC=C(C4=NC5=C(O4)C4=C(C=CC=C4)C4=C5C=CC=C4)C=C3)C3=C2C=CC=C3)C=C1	0.51
N#CC1=CC=C(C=C1)N2C3=C(C4(C5=C2C=CC=C5)C6=C(N(C7=C4C=CC=C7)C8=CC=C(C#N)C=C8)C=CC=C6)C=CC=C3	N#CC1=CC=C(C=C1)N2C3=C(C4(C5=C2C=CC=C5)C6=C(N(C7=C4C=CC=C7)C8=CC=C(C#N)C=C8)C=CC=C6)C=CC=C3	0.27
N#CC1=CC=C(C=C1)C2=C3C=CC=CC3=C(C4=C2C=CC=C4)C5=CC=CC(C6=NC(C7=C(C8=C9C=CC=C8)C=CC=C7)=C9O6)=C5	N#CC1=CC=C(C=C1)C2=C3C=CC=CC3=C(C4=C2C=CC=C4)C5=CC=CC(C6=NC(C7=C(C8=C9C=CC=C8)C=CC=C7)=C9O6)=C5	0.53
N#CC1=C(N2C3=C(C=CC=C3)C3=C2C=CC=C3)N=CN=C1N1C2=C(C=CC=C2)C2=C1C=CC=C2	N#CC1=C(N2C3=C(C=CC=C3)C3=C2C=CC=C3)N=CN=C1N1C2=C(C=CC=C2)C2=C1C=CC=C2	0.53
N#CC1=C(N2C3=C(C=CC=C3)C3=C2C=CC=C3)C(N2C3=C(C=C(C4=CC=CC=C4)C=C3)C3=C2C=CC(C2=CC=CC=C2)=C3)=CC(N2C3=C(C=C(C4=CC=CC=C4)C=C3)C3=C2C=CC(C2=CC=CC=C2)=C3)=C1N1C2=C(C=CC=C2)C2=C1C=CC=C2	N#CC1=C(N2C3=C(C=CC=C3)C3=C2C=CC=C3)C(N2C3=C(C=C(C4=CC=CC=C4)C=C3)C3=C2C=CC(C2=CC=CC=C2)=C3)=CC(N2C3=C(C=C(C4=CC=CC=C4)C=C3)C3=C2C=CC(C2=CC=CC=C2)=C3)=C1N1C2=C(C=CC=C2)C2=C1C=CC=C2	0.45
N#CC1=C(C2=CC=C(N3C4=C(C=CC=C4)C4=C3C=CC=C4)C=C2)C=CC=C1OC1=CC(C2=CC=C(N3C4=C(C=CC=C4)C4=C3C=CC=C4)C=C2)=CC=C1	N#CC1=C(C2=CC=C(N3C4=C(C=CC=C4)C4=C3C=CC=C4)C=C2)C=CC=C1OC1=CC(C2=CC=C(N3C4=C(C=CC=C4)C4=C3C=CC=C4)C=C2)=CC=C1	0.88
C1(C2=NC(C3=CC=CC=C3)=NC(C4=CC=CC=C4)=N2)=CC(C5=CC=CC=C5)=C(N6C7=CC=C(N8C9=C(C%10=C8C=CC=C%10)C=CC=C9)C=C7C%11=C6C=CC=C%11)C=C1	N#CC1=C(C(C2=CC3=C(OC4=C3C=C(C)C=C4)C=C2)=CC=C1)N5C6=C(C7=C5C=CC=C7)C=CC=C6	0.793
COC1=CC(C2=NC(C3=CC=CC(OC)=C3)=NC(C3=CC=CC=C3N3C4=C(C=C(C(C)(C)C)C=C4)C4=C3C=CC(C(C)(C)C)=C4)=N2)=CC=C1	COC1=CC(C2=NC(C3=CC=CC(OC)=C3)=NC(C3=CC=CC=C3N3C4=C(C=C(C(C)(C)C)C=C4)C4=C3C=CC(C(C)(C)C)=C4)=N2)=CC=C1	0.29
CC1C2=CC=CC3=C2B2C4=C(C=CC=C4C(C)C4=C2C1=CC(N1C2=CC=CC=C2C2(C5=C(C=CC=C5)C5=C2C=CC=C5)C2=C1C=CC=C2)=C4)C3	CC1C2=CC=CC3=C2B2C4=C(C=CC=C4C(C)C4=C2C1=CC(N1C2=CC=CC=C2C2(C5=C(C=CC=C5)C5=C2C=CC=C5)C2=C1C=CC=C2)=C4)C3	0.6
CC1=CC(C)=C(C=C1)N(C2=C3C=CC4=C5C(C=CC(C=C2)=C35)=C(C=C4)N(C6=C(C=CC(C(C)(C)C)=C6)C)C7=C(C=C(C=C7)C)C)C8=C(C=CC(C(C)(C)C)=C8)C	CC1=CC2=C(C=C1)C(C1=CC3=C(C=CC=C3)C=C1)=C1C=CC=CC1=C2C1=CC2=C(C=CC=C2)C=C1	0.94
CC1=CC2=C3B(C4=C(N2C5=CC=C(C=C5)C(C)(C)C)C=CC(C(C)(C)C)=C4)C6=C(N(C3=C1)C7=CC=C(C=C7)C(C)(C)C)C=CC(C(C)(C)C)=C6	CC1=CC2=C(C=C1)C(C1=CC3=C(C=CC=C3)C=C1)=C1C=CC=CC1=C2C1=CC2=C(C=CC=C2)C=C1	0.77
CC1=CC(N2C3=C(C=CC=C3)C(C)(C)C3=C2C=CC=C3)=CC(C)=C1B1C2=C(C=CC=C2)OC2=C1C=CC=C2	CC1=CC=CC=C1	1
CC1=CC(N2C3=C(C=CC=C3)C(C)(C)C3=C2C=CC=C3)=CC(C)=C1B1C2=C(C=CC=C2)CC2=C1C=CC=C2	CC1=CC=CC=C1	1
CC1=CC=CC=C1N(C1=CC=C(C(C)(C)C)C=C1)C1=CC=C2C=CC3=C(N(C4=CC=C(C(C)(C)C)C=C4)C4=CC=CC=C4C)C=CC4=C3C2=C1C=C4	CC1=CC=CC=C1	1
F[B-]1(OC2=CC=CC=C2C3=CC(C4=C(C=C(C=C4C)N5C6=C(C7=C5C=CC=C7)C=CC=C6)C)=CC=[N+]31)F	CC1=CC=CC=C1	0.98
CC1(C)C2=CC=CC3=C2B2C4=C(C=CC=C4C(C)(C)C4=C2C1=CC(N1C2=C(C=CC=C2)C(C)(C)C2=C1C=CC=C2)=C4)O3	CC1=CC=CC=C1	0.97
CC1=CC(N2C3=C(C=CC=C3)C(C3=CC=CC=C3)(C3=CC=CC=C3)C3=C2C=CC=C3)=CC(C)=C1B1C2=C(C=CC=C2)CC2=C1C=CC=C2	CC1=CC=CC=C1	0.97
CC(C)C1=CC(N2C3=CC=CC=C3C3(C4=C(C=CC=C4)C4=C3C=CC=C4)C3=C2C=CC=C3)=CC(C(C)C)=C1B1C2=C(C=CC=C2)C2(C3=C1C=CC=C3)C1=C(C=CC=C1)C1=C2C=CC=C1	CC1=CC=CC=C1	0.95
CC1(C)C2=C(C=CC=C2)N(C2=CC=C(C3=NC(C4=CC=CC=C4)=NC(C4=CC=CC=C4)=N3)C=C2)C2=C1C=CC=C2	CC1=CC=CC=C1	0.95
C1=CC=C(C2=NC(C3=CC=CC=C3)=NC(C3=CC=C(N4C5=C(C=CC=C5)C5=C4C=CC(C4=CC=C6C(=C4)C4=C(C=CC=C4)N6C4=CN=CC=C4)=C5)C=C3)=N2)C=C1	CC1=CC=CC=C1	0.95
C1(C2=NC(C3=CC=CC=C3)=NC(C4=CC=C(C=C4)N5C6=C(C7=C5C=CC(C8=CC=C9C(C=CN9C%10=CN=CC=C%10)=C8)=C7)C=CC=C6)=N2)=CC=CC=C1	CC1=CC=CC=C1	0.95
CC1C2=CC=CC3=C2B2C4=C(C=CC=C4C(C)C4=C2C1=CC(N1C2=CC=CC=C2C2(C5=C(C=CC=C5)C5=C2C=CC=C5)C2=C1C=CC=C2)=C4)C3	CC1=CC=CC=C1	0.94
CC1=CC(N2C3=C(C=CC=C3)C(C)(C)C3=C2C=CC=C3)=CC(C)=C1C1=NC(C2=CC=CC=C2)=NC(C2=CC=CC=C2)=N1	CC1=CC=CC=C1	0.94
CC1=CC(C2=CC=[N+]3C(C4=CC=CC=C4O[B-]3(F)F)=C2)=CC=C1N5C6=C(C=C(C7=CC=CC=C7)C=C6)C8=C5C=CC(C9=CC=CC=C9)=C8	CC1=CC=CC=C1	0.94
N(C1=CC=CC=C1)(C2=CC3=C4B(C5=CC6=C(C=C5S3)OC7=C8B6C9=C(C=CC=C9)N(C8=CC(N(C%10=CC=CC=C%10)C%11=CC=CC=C%11)=C7)C%12=CC=CC=C%12)C%13=C(C=CC=C%13)N(C4=C2)C%14=CC=CC=C%14)C%15=CC=CC=C%15	CC1=CC=CC=C1	0.94
N(C1=CC=CC=C1)(C2=CC3=C4B(C5=CC6=C(C=C5S3)SC7=C8B6C9=C(C=CC=C9)N(C8=CC(N(C%10=CC=CC=C%10)C%11=CC=CC=C%11)=C7)C%12=CC=CC=C%12)C%13=C(C=CC=C%13)N(C4=C2)C%14=CC=CC=C%14)C%15=CC=CC=C%15	CC1=CC=CC=C1	0.93
CC1=CC=CC=C1C1=NC(C2=CC=C(N3C4=C(C=CC=C4)C(C)(C)C4=C3C=CC=C4)C=C2)=NC(C2=CC=CC=C2C)=N1	CC1=CC=CC=C1	0.92
N#CC1=C(C2=C(C#N)C(N3C4=C(C=CC=C4)C4=C3C=CC=C4)=CC(N3C4=C(C=CC=C4)C4=C3C=CC=C4)=C2C#N)C(C#N)=C(N2C3=C(C=CC=C3)C3=C2C=CC=C3)C=C1N1C2=C(C=CC=C2)C2=C1C=CC=C2	CC1=CC=CC=C1	0.91
CC1=CC(C)=C(B(C2=C(C)C=C(C)C=C2C)C3=C(C)C=C(N4C5=C(C=CC=C5)C6=C4C=CC(N(C7=CC=CC=C7)C8=CC=CC=C8)=C6)C=C3C)C(C)=C1	CC1=CC=CC=C1	0.91
CC1=CC=CC=C1C1=NC(C2=CC=CC=C2)=NC(C2=CC=C(N3C4=C(C=CC=C4)C(C)(C)C4=C3C=CC=C4)C=C2C)=N1	CC1=CC=CC=C1	0.91
CCCCN1C(C2=CC=C(C3=CC=CC(C1=O)=C23)OC4=CC=CC=C4)=O	CC1=CC=CC=C1	0.9072
CC1(C)C2=CC(N3C4=C(C=CC=C4)C(C)(C)C4=C3C=CC=C4)=CC3=C2B2C4=C(C=CC=C41)C(C)(C)C1=C2C(=CC=C1)C3(C)C	CC1=CC=CC=C1	0.9
N#CC1=CC=C(C=C1)C2=C3C=CC=CC3=C(C4=C2C=CC=C4)C5=CC=CC(C6=NC(C7=C(C8=C9C=CC=C8)C=CC=C7)=C9O6)=C5	CC1=CC=CC=C1	0.9
N#CC1=C(C2=CC=C(N3C4=C(C=CC=C4)C4=C3C=CC=C4)C=C2)C=CC=C1OC1=CC(C2=CC=C(N3C4=C(C=CC=C4)C4=C3C=CC=C4)C=C2)=CC=C1	CC1=CC=CC=C1	0.9
CC1=CC(C)=C(B(C2=CC=C(N3C4=C(C=CC=C4)C(C)(C)C4=C3C=CC=C4)C=C2)C2=C(C)C=C(C)C=C2C)C=C1	CC1=CC=CC=C1	0.89
CC1=CC(N2C3=C(C=CC=C3)C(C)(C)C3=C2C=CC=C3)=CC=C1C1=NC(C2=CC=CC=C2)=NC(C2=CC=CC=C2)=N1	CC1=CC=CC=C1	0.89
N#CC1=CC=C(C2=C3C=CC=CC3=C(C3=CC=C(C4=NC5=C(O4)C4=C(C=CC=C4)C4=C5C=CC=C4)C=C3)C3=C2C=CC=C3)C=C1	CC1=CC=CC=C1	0.89
C1=CC=C(C2=NC(C3=CC=CC=C3)=NC(C3=CC=C(N4C5=C(C=C(C6=CC=C7C(=C6)C6=C(C=CC=C6)N7C6=CC=CC=C6)C=C5)C5=C4C=CC(C4=CC6=C(C=C4)N(C4=CC=CC=C4)C4=C6C=CC=C4)=C5)C=C3)=N2)C=C1	CC1=CC=CC=C1	0.88
F[B-]1(OC2=CC(C3=CC=CC=C3C)=CC=C2C4=CC=CC5=[N+]14)OC6=C5C=CC(C7=C(C=CC=C7)C)=C6	CC1=CC=CC=C1	0.88
N#CC1=CC(C#N)=C(N2C3=C(C=CC=C3)C3=C2C=CC=C3)C=C1N1C2=C(C=CC=C2)C2=C1C=CC(C1=CC3=C(C=C1)N(C1=CC(N4C5=C(C=CC=C5)C5=C4C=CC=C5)=C(C#N)C=C1C#N)C1=C3C=CC=C1)=C2	CC1=CC=CC=C1	0.87
CC1=CC(C)=C(B(C2=CC=C(N3C4=C(C=CC=C4)OC4=C3C=CC=C4)C=C2)C2=C(C)C=C(C)C=C2C)C(C)=C1	CC1=CC=CC=C1	0.87
CC(C)C1=CC2=C(C=C1)N(C1=CC=C(C3=C(C#N)C(OC4=CC(C5=CC=C(N6C7=C(C=C(C(C)(C)C)C=C7)C7=C6C=CC(C(C)(C)C)=C7)C=C5)=CC=C4)=CC=C3)C=C1)C1=C2C=C(C(C)(C)C)C=C1	CC1=CC=CC=C1	0.87
FC(F)(F)C1=CC(C2=CC=C(N3C4=C(C=CC=C4)C4=C3C=CC=C4)C=C2)=CC(C(F)(F)F)=N1	CC1=CC=CC=C1	0.8693
CC(C1=CC2=C(C=C1)N(C3=C(C(N4C5=C(C=C(C(C)(C)C)C=C5)C6=C4C=CC(C(C)(C)C)=C6)=C(N7C8=C(C=C(C(C)(C)C)C=C8)C9=C7C=CC(C(C)(C)C)=C9)C(C#N)=C3N%10C%11=C(C=C(C(C)(C)C)C=C%11)C%12=C%10C=CC(C(C)(C)C)=C%12)N%13C%14=C(C=C(C(C)(C)C)C=C%14)C%15=C%13C=CC(C(C)(C)C)=C%15)C%16=C2C=C(C(C)(C)C)C=C%16)(C)C	CC1=CC=CC=C1	0.86
CC1=CC2=C(C(C)=C1)N(C1=CC=C(C3=NC(C4=CC=CC=C4)=NC(C4=CC=CC=C4)=N3)C=C1)C1=C2C=C(C)C=C1C	CC1=CC=CC=C1	0.86
N#CC1=C(C2=CC=C(N3C4=C(C=CC=C4)C4=C3C=CC=C4)C=C2)C=CC=C1OC1=CC=CC=C1	CC1=CC=CC=C1	0.86
CC1=CC(C)=C(B(C2=C(C)C=C(C)C=C2C)C2=C(C)C=C(N3C4=C(C=C(N(C5=CC=CC=C5)C5=CC=CC=C5)C=C4)C4=C3C=CC(N(C3=CC=CC=C3)C3=CC=CC=C3)=C4)C=C2C)C(C)=C1	CC1=CC=CC=C1	0.84
BrC1=CC(C2=CC=C(N3C4=C(C=CC=C4)OC4=C3C=CC=C4)C=C2)=C2OC3=C(C=CC=C3)B3C4=C(C=CC=C4)OC1=C32	CC1=CC=CC=C1	0.84
CC1=CC(C)=C(B(C2=C(C)C=C(C)C=C2C)C3=C(C)C=C(N4C5=C(C=C(C=C5)N(C6=CC=CC=C6)C7=CC=CC=C7)C8=C4C=CC(N(C9=CC=CC=C9)C%10=CC=CC=C%10)=C8)C=C3C)C(C)=C1	CC1=CC=CC=C1	0.84
CC1=CC=CC=C1C1=NC(C2=CC=CC=C2C)=NC(C2=C(C)C=C(N3C4=C(C=CC=C4)C(C)(C)C4=C3C=CC=C4)C=C2C)=N1	CC1=CC=CC=C1	0.83
COC1=CC2=C(C=C1)N(C1=CC=CC(N3C4=C(C=C(OC)C=C4)C4=C3C=CC(OC)=C4)=C1C#N)C1=C2C=C(OC)C=C1	CC1=CC=CC=C1	0.83
N#CC1=C(C#N)N=C2C(=N1)C1=C(N=C(C3=CC=C(N(C4=CC=CC=C4)C4=CC=CC=C4)C=C3)C=C1)C1=C2C=CC(C2=CC=C(N(C3=CC=CC=C3)C3=CC=CC=C3)C=C2)=N1	CC1=CC=CC=C1	0.814
N#CC1=C(N2C3=C(C=CC=C3)C3=C2C=CC=C3)C(N2C3=C(C=CC=C3)C3=C2C=CCC3)=C(N2C3=C(C=CC=C3)C3=C2C=CC=C3)C(F)=C1N1C2=C(C=CC=C2)C2=C1C=CC=C2	CC1=CC=CC=C1	0.81
CC1(C2=CC=CC=C2N(C3=C1C=CC=C3)C4=CC=C(C=C4)S(=O)(C5=CC=C(C=C5)N6C7=CC=CC=C7C(C)(C8=C6C=CC=C8)C)=O)C	CC1=CC=CC=C1	0.8
CC(C)(C)C1=CC=C(N2C3=CC=CC4=C3B(C3=C2C=CC(C(C)(C)C)=C3)C2=C(C=CC(C(C)(C)C)=C2)N4C2=CC=C(C(C)(C)C)C=C2)C=C1	CC1=CC=CC=C1	0.8
CC(C)(C)C1=CC=C(N(C2=CC=C(S(=O)(=O)C3=CC=C(S(=O)(=O)C4=CC=C(N(C5=CC=C(C(C)(C)C)C=C5)C5=C(C(C)(C)C)C=CC=C5)C=C4)C=C3)C=C2)C2=CC=CC=C2C(C)(C)C)C=C1	CC1=CC=CC=C1	0.8
CC1=CC(C)=C(N(C2=CC=CC=C2)C2=CC=C(S(=O)(=O)C3=CC=C(S(=O)(=O)C4=CCC(N(C5=CC=CC=C5)C5=C(C)C=C(C)C=C5C)C=C4)C=C3)C=C2)C(C)=C1	CC1=CC=CC=C1	0.79
CC1=CC=CC2=C1N(C1=CC=C(C3=C(C4=CC=C(N5C6=C(C=CC=C6)C6=C5C(C)=CC=C6)C=C4)C(C4=CC=CC=C4)=C(C#N)C(C#N)=C3C3=CC=CC=C3)C=C1)C1=C2C=CC=C1	CC1=CC=CC=C1	0.78
CC1=CC2=C(C=C1)N(C3=C2C=C(C)C=C3)C4=NC(N5C6=C(C7=C5C=CC(C)=C7)C=C(C)C=C6)=CC(C8=CC(N9C%10=C(C%11=C9C=CC(C)=C%11)C=C(C)C=C%10)=NC(N(C%12=C%13C=C(C)C=C%12)C%14=C%13C=C(C)C=C%14)=C8)=C4	CC1=CC=CC=C1	0.78
CC(C)(C)C1=CC=C2C(=C1)C1=C(C=CC(C(C)(C)C)=C1)N2C1=CC=C(S(=O)(=O)C2=CC(N3C4=CC=C(C(C)(C)C)C=C4C4=C3C=CC(C(C)(C)C)=C4)=CC=C2)C=C1	CC1=CC=CC=C1	0.777
C1=CC=C(N(C2=CC=CC=C2)C2=CC3=C(C=C2)N(C2=CC4=C(C=C2)C2=C(N=CC=N2)C2=C4C=C(N4C5=C(C=CC=C5)C5=C4C=CC(N(C4=CC=CC=C4)C4=CC=CC=C4)=C5)C=C2)C2=C3C=CC=C2)C=C1	CC1=CC=CC=C1	0.77
CC(C)C1=CC(C(C)C)=C(B2C3=CC=CC=C3OC3=C2C=CC(N2C4=C(C=CC=C4)C4(C5=C(C=CC=C5)C5=C4C=CC=C5)C4=C2C=CC=C4)=C3)C(C(C)C)=C1	CC1=CC=CC=C1	0.76
C1=CC2=C(C=C1)B1C3=C(C=CC=C3)OC3=C(C4=CC=C(N5C6=C(C=CC=C6)OC6=C5C=CC=C6)C=C4)C=CC(=C13)O2	CC1=CC=CC=C1	0.76
N#CC1=C(N2C3=C(C=CC=C3)C3=C2C=CC=C3)C(F)=C(N2C3=C(C=CC=C3)C3=C2C=CC=C3)C(F)=C1N1C2=C(C=CC=C2)C2=C1C=CC=C2	CC1=CC=CC=C1	0.76
N(C1=CC=CC=C1)(C2=CC=CC=C2)C3=CC4=C5B(C6=C(N(C7=CC=CC=C7)C5=C3)C=CC=C6)C8=CC9=C(OC%10=C%11B9C%12=C(N(C%13=CC=CC=C%13)C%11=CC(N(C%14=CC=CC=C%14)C%15=CC=CC=C%15)=C%10)C=CC=C%12)C=C8O4	CC1=CC=CC=C1	0.76
FC(F)(F)C1=CC(C2=CC=C(N3C4=C(C=CC=C4)C4=C3C=CC=C4)C=C2)=CC(C(F)(F)F)=C1	CC1=CC=CC=C1	0.7598
FC(F)(F)C1=NC=C(C2=CC=C(N3C4=C(C=CC=C4)C4=C3C=CC=C4)C=C2)C=N1	CC1=CC=CC=C1	0.7416
C1=CC=C(C2=NC(C3=CC=CC=C3)=NC(C3=CC=C(N4C5=C(C=CC=C5)C5=C4C=CC(N4C6=C(C=CC=C6)C6=C4C=CC=C6)=C5)C=C3)=N2)C=C1	CC1=CC=CC=C1	0.72
N#CC1=CC=CC(C#N)=C1N1C2=CC=C(C3=CC4=C(C=C3)N(C3=C(C#N)C=CC=C3C#N)C3=CC=CC=C34)C=C2C2=C1C=CC=C2	CC1=CC=CC=C1	0.72
CC1=CC2=C(C=C1)N(C1=CC=C(C3=NC(C4=CC=CC=C4)=NC(C4=CC=CC=C4)=N3)C=C1)C1=C2C=C(C)C=C1	CC1=CC=CC=C1	0.72
FC(F)(F)C1=NC(C(F)(F)F)=C(C2=CC=C(N3C4=C(C=CC=C4)C4=C3C=CC=C4)C=C2)C=C1	CC1=CC=CC=C1	0.7184
CC1=CC(C)=C(C(C)=C1)B(C2=C(C=C(C=C2C)C)C)C3=CC(N4C5=C(C(C)(C6=C4C=CC=C6)C)C=CC=C5)=CC(C(C)(C)C)=C3	CC1=CC=CC=C1	0.715
N#CC1=C(C(N2C3=C(C4=C2C=CC=C4)C=CC=C3)=C(N5C6=C(C7=C5C=CC=C7)C=CC=C6)C(N8C9=C(C%10=C8C=CC=C%10)C=CC=C9)=C1N%11C%12=C(C%13=C%11C=CC=C%13)C=CC=C%12)N%14C%15=C(C%16=C%14C=CC=C%16)C=CC=C%15	CC1=CC=CC=C1	0.7
CC1=CC(C)=C(B(C2=CC(N3C4=C(C=CC=C4)OC4=C3C=CC=C4)=CC(C(C)(C)C)=C2)C2=C(C)C=C(C)C=C2C)C(C)=C1	CC1=CC=CC=C1	0.7
CCCCC1=CC2=C(C=C1)N(C1=CC=C(S(=O)(=O)C3=CC=C(S(=O)(=O)C4=CC=C(N5C6=C(C=C(CCCC)C=C6)C6=C5C=CC(CCCC)=C6)C=C4)C=C3)C=C1)C1=C2C=C(CCCC)C=C1	CC1=CC=CC=C1	0.7
CC1=CC(C)=CC(C)=C1C2=CC3=C(N4C5=C(C6=C4C3=CC(C7=C(C=C(C=C7C)C)C)=C6)C=C8C(C9=C%10C(C%11=C(N8%10)C=CC(C%12=C(C=C(C=C%12C)C)C)=C%11)=CC(C%13=C(C=C(C=C%13C)C)C)=C9)=C5)C=C2	CC1=CC=CC=C1	0.7
N#CC1=CC2=NC3=C(C4=CC=C(C=C4C5=C3C=CC(N6C7=C(C8(C9=C6C=CC=C9)C%10=C(C%11=C8C=CC=C%11)C=CC=C%10)C=CC=C7)=C5)N%12C%13=C(C%14(C%15=C%12C=CC=C%15)C%16=C(C%17=C%14C=CC=C%17)C=CC=C%16)C=CC=C%13)NC2C=C1C#N	CC1=CC=CC=C1	0.67
N#CC1=CC(C#N)=C(N2C3=C(C=CC=C3)C3=C2C=CC=C3)C=C1N1C2=C(C=CC=C2)C2=C1C=CC=C2C1=CC2=C(C=C1)N(C1=CC(N3C4=C(C=CC=C4)C4=C3C=CC=C4)=C(C#N)C=C1N)C1=C2C=CC=C1	CC1=CC=CC=C1	0.66
C1=CC=C(C2=NC(C3=CC(N4C5=C(C=CC=C5)C5=C4C=CC=C5)=CC(N4C5=C(C=CC=C5)C5=C4C=CC=C5)=C3)=NC(C3=CC(N4C5=C(C=CC=C5)C5=C4C=CC=C5)=CC(N4C5=C(C=CC=C5)C5=C4C=CC=C5)=C3)=N2)C=C1	CC1=CC=CC=C1	0.66
CCN1C2=CC=CC=C2C3=CC4=C(C=C31)N(C5=C4C=CC=C5)C(C=C6)=CC=C6C7=NC(C8=CC=CC=C8)=NC(C9=CC=CC=C9)=N7	CC1=CC=CC=C1	0.66
CC1=CC(C)=C(C2=CC3=C(C=C2)N2C4=C(C=C(C5=C(C)C=C(C)C=C5C)C=C4)C4=C2C3=CC(C2=C(C)C=C(C)C=C2C)=C4)C(C)=C1	CC1=CC=CC=C1	0.66
CC(C)(C)C1=CC=C2C(=C1)C1=C(C=CC(C(C)(C)C)=C1)N2C1=CC(S(=O)(=O)C2=CC=CC(N3C4=CC=C(C(C)(C)C)C=C4C4=C3C=CC(C(C)(C)C)=C4)=C2)=CC=C1	CC1=CC=CC=C1	0.656
CC(C)(C1=CC=C(C=C1)N(C2=CC=C(C=C2)S(=O)(C3=CC=C(C=C3)N(C4=CC=C(C=C4)C(C)(C)C)C5=CC=C(C=C5)C(C)(C)C)=O)C6=CC=C(C=C6)C(C)(C)C)C	CC1=CC=CC=C1	0.65
C1=CC2=C(C=C1)N(C1=CC(C3=CC(N4C5=C(C=CC=C5)C5=C4C=CC=C5)=NC(N4C5=C(C=CC=C5)C5=C4C=CC=C5)=C3)=CC(N3C4=C(C=CC=C4)C4=C3C=CC=C4)=N1)C1=C2C=CC=C1	CC1=CC=CC=C1	0.65
N#CC1=C(C#N)C=C(N2C3=C(C=C(N4C5=C(C=CC=C5)C5=C4C=CC=C5)C=C3)C3=C2C=CC(N2C4=C(C=CC=C4)C4=C2C=CC=C4)=C3)C(N2C3=C(C=C(N4C5=C(C=CC=C5)C5=C4C=CC=C5)C=C3)C3=C2C=CC(N2C4=C(C=CC=C4)C4=C2C=CC=C4)=C3)=C1	CC1=CC=CC=C1	0.63
CC1=CC(C)=C(C(C)=C1)B(C2=C(C=C(C=C2C)C)C)C3=CC(N4C5=C(C6(C7=C4C=CC=C7)C8=C(C9=C6C=CC=C9)C=CC=C8)C=CC=C5)=CC(C(C)(C)C)=C3	CC1=CC=CC=C1	0.61
CC1=CC2=C(C=C1)N(C1=CC=C(C3=NC(C4=CC=CC=C4)=NC(C4=CC=CC=C4)=N3)C=C1C)C1=C2C=C(C)C=C1	CC1=CC=CC=C1	0.6
CC(C)(C)C1=CC2=C(C=C1)SC1=C3B2C2=C(C=CC(C(C)(C)C)=C2)N2C4=C(C=C(C(C)(C)C)C=C4)B4C5=C(C=CC(C(C)(C)C)=C5)SC(=C1)C4=C32	CC1=CC=CC=C1	0.59
CC(C)(C)C1=CC=C2C(=C1)C1=C(C=CC(C(C)(C)C)=C1)N2C1=CC=C(S(=O)(=O)C2=CC=CC=C2)C=C1	CC1=CC=CC=C1	0.587
C1=CC2=C(C=C1)N1C3=C(C=CC=C3)C3=C1C2=CC=C3	CC1=CC=CC=C1	0.58
CC(C1=CC2=C(N(C3=C2C=C(C=C3)C(C)(C)C)C4=NC5=NC(N6C7=CC=C(C(C)(C)C)C=C7C8=C6C=CC(C(C)(C)C)=C8)=CC=C5C=C4)C(N9C%10=CC=C(C(C)(C)C)C=C%10C%11=C9C=CC(C(C)(C)C)=C%11)=C1)(C)C	CC1=CC=CC=C1	0.58
C1=CC=C(C2N=C(C3=CCCC=C3)N=C(C3=CC=C(N4C5=C(C=C(N6C7=C(C=CC=C7)C7=C6C=CC=C7)C=C5)C5=C4C=CC(N4C6=C(C=CC=C6)C6=C4C=CC=C6)=C5)C=C3)N2)C=C1	CC1=CC=CC=C1	0.57
O=S(=O)(C1=CC=C(N(C2=CC=CC=C2)C2=CC=CC=C2)C=C1)C1=CC=C(N(C2=CC=CC=C2)C2=CC=CC=C2)C=C1	CC1=CC=CC=C1	0.57
CC(C)C1=CC(C(C)C)=C(B2C3=CC=CC=C3OC3=C2C=CC(N2C4=C(C=CC=C4)C4(C5=CC=CC=C5OC5=C4C=CC=C5)C4=C2C=CC=C4)=C3)C(C(C)C)=C1	CC1=CC=CC=C1	0.56
COC1=CC2=C(C=C1)N(C1=CC=C(S(=O)(=O)C3=CC=C(N4C5=C(C=C(OC)C=C5)C5=C4C=CC(OC)=C5)C=C3)C=C1)C1=C2C=C(OC)C=C1	CC1=CC=CC=C1	0.56
CC(C)(C1=CC2=C(OC3=CC(N4C5=C(C6=C4C=CC(C7=CC=C(C(C)(C)C)C=C7)=C6)C=C(C8=CC=C(C(C)(C)C)C=C8)C=C5)=CC9=C3B2C%10=C(O9)C=CC(C(C)(C)C)=C%10)C=C1)C	CC1=CC=CC=C1	0.559
CC(C)(C)C1=CC=C(C2=CC3=C(C=C2)N(C2=CC4=C5B(C6=C(C=CC(C(C)(C)C)=C6)OC5=C2)C2=C(C=CC(C(C)(C)C)=C2)O4)C2=C3C=C(C3=CC=C(C(C)(C)C)C=C3)C=C2)C=C1	CC1=CC=CC=C1	0.559
N#CC1=CC=C2C(C3=C(C4=C2NC5C=C(F)C(N6C7=C(C8(C9=C6C=CC=C9)C%10=C(C%11=C8C=CC=C%11)C=CC=C%10)C=CC=C7)=CC5=N4)C=CC(C#N)=C3)=C1	CC1=CC=CC=C1	0.554
CC(C)(C)C1=CC=C(C2=NC(C3=CC=C(C(C)(C)C)C=C3)=NC(C3=CC(N4C5=C(C=C(C(C)(C)C)C=C5)C5=C4C=CC(C(C)(C)C)=C5)=CC(N4C5=C(C=C(C(C)(C)C)C=C5)C5=C4C=CC(C(C)(C)C)=C5)=C3)=N2)C=C1	CC1=CC=CC=C1	0.54
BrC1=CC(C2=CC=C(N3C4=C(C=CC=C4)SC4=C3C=CC=C4)C=C2)=C2OC3=C(C=CC=C3)B3C4=C(C=CC=C4)OC1=C32	CC1=CC=CC=C1	0.53
CC(C)(C1=CC2=C(OC3=CC(N4C5=C(C6=C4C=CC(C(C)(C)C)=C6)C=C(C=C5)C(C)(C)C)=CC7=C3B2C8=C(O7)C=CC(C(C)(C)C)=C8)C=C1)C	CC1=CC=CC=C1	0.522
CC(C)(C1=CC2=C(OC3=CC(N4C5=C(C6=C4C=CC(C(C)(C)C)=C6)C=C(C=C5)C(C)(C)C)=CC7=C3B2C8=C(O7)C=CC(C(C)(C)C)=C8)C=C1)C	CC1=CC=CC=C1	0.522
CC(C)(C)C1=CC2=C(C=C1)OC1=CC(N3C4=C(C=C(N5C6=C(C=CC=C6)C6=C5C=CC=C6)C=C4)C4=C3C=CC(N3C5=C(C=CC=C5)C5C=CC=CC53)=C4)=CC3=C1B2C1=C(C=CC(C(C)(C)C)=C1)O3	CC1=CC=CC=C1	0.52
CC(C)(C)C1=CC2=C(C=C1)OC1=CC(CN3C4=C(C=C(N(C5=CC=CC=C5)C5=CC=CC=C5)C=C4)C4=C3C=CC(N(C3=CC=CC=C3)C3=CC=CC=C3)=C4)=CC3=C1B2C1=C(C=CC(C(C)(C)C)=C1)O3	CC1=CC=CC=C1	0.52
CC1=CC=C(S(=O)(=O)C2=CC(N3C4=C(C=C(C5=CC=CC=C5)C=C4)C4=C3C=CC(C3=CC=CC=C3)=C4)=NC(N3C4=C(C=C(C5=CC=CC=C5)C=C4)C4=C3C=CC(C3=CC=CC=C3)=C4)=C2)C=C1	CC1=CC=CC=C1	0.514
COC1=CC(C2=NC(C3=CC=CC(OC)=C3)=NC(C3=CC=CC=C3N3C4=C(C=C(C(C)(C)C)C=C4)C4=C3C=CC(C(C)(C)C)=C4)=N2)=CC=C1	CC1=CC=CC=C1	0.51
CC(C)(C1=CC2=C(N(C3=C2C=C(C=C3)C(C)(C)C)C4=CC5=C(C6=NC7=C(F)C=CC=C7N=C6C8=C5C=C(C=C8)N9C%10=C(C%11=C9C=CC(C(C)(C)C)=C%11)C=C(C=C%10)C(C)(C)C)C=C4)C=C1)C	CC1=CC=CC=C1	0.51
CC(C)(C)C1=CC=C2C(=C1)C1=C(C=CC(C(C)(C)C)=C1)N2C1=CC=CC(S(=O)(=O)C2=CC=CC=C2)=C1	CC1=CC=CC=C1	0.507
CC(C)(C)C1=CC2=C(C=C1)OC1=CC(N3C4=C(C=C(C5=CC=C6C(=C5)C5=C(C=CC=C5)N6C5=CC=CC=C5)C=C4)C4=C3C=CC(C3=CC5=C(C=C3)N(C3=CC=CC=C3)C3=C5C=CC=C3)=C4)=CC3=C1B2C1=C(C=CC(C(C)(C)C)=C1)O3	CC1=CC=CC=C1	0.505
N#CC1=NC2=C(N=C1C#N)C1=C(C=C(N3C4=C(C=CC=C4)C4(C5=C(C=CC=C5)C5=C4C=CC=C5)C4=C3C=CC=C4)C=C1)C1=CC(N3C4=C(C=CC=C4)C4(C5=C(C=CC=C5)C5=C4C=CC=C5)C4=C3C=CC=C4)=CC=C12	CC1=CC=CC=C1	0.502
N#CC1=CC(C#N)=CC(N2C3=CC=C(C4=CC5=C(C=C4)N(C4=CC(C#N)=CC(C#N)=C4)C4=CC=CC=C45)C=C3C3=C2C=CC=C3)=C1	CC1=CC=CC=C1	0.5
N#CC1=C(N2C3=C(C=CC=C3)C3=C2C=CC=C3)C(N2C3=C(C=CC=C3)C3=C2C=CC=C3)=CC(N2C3=C(C=CC=C3)C3=C2C=CC=C3)=C1N1C2=C(C=CC=C2)C2=C1C=CC=C2	CC1=CC=CC=C1	0.49
CC1=CC2=C(C=C1)N(C1=CC3=C(C=C1)P(=S)(C1=CC=CC=C1)C1=C(C=CC=C1)O3)C1=C(C=C(C)C=C1)C21C2=C(C=CC=C2)C2=C1C=CC=C2	CC1=CC=CC=C1	0.49
CC1=CC2=C(C=C1)N(C1=CC3=C(C=C1)P(=O)(C1=CC=CC=C1)C1=C(C=CC=C1)O3)C1=C(C=C(C)C=C1)C21C2=C(C=CC=C2)C2=C1C=CC=C2	CC1=CC=CC=C1	0.49
CC1(C2=C(N(C3=C1C=CC=C3)C4=CC5=C(S(=O)(C6=CC=CC=C6O5)=O)C=C4)C=CC=C2)C	CC1=CC=CC=C1	0.48
CC1=CC=CC=C1C2=CC=C3O[B-]4(OC5=C(C6=[N+]4C(C3=C2)=CC=C6)C=C(C=C5)C7=C(C=CC=C7)C)F	CC1=CC=CC=C1	0.47
N#CC1=C(C#N)C=C(N2C3=C(C=CC=C3)C3=C2C=CC=C3)C(N2C3=C(C=CC=C3)C3=C2C=CC=C3)=C1	CC1=CC=CC=C1	0.465
CC1=CC2=C(C=C1)N(C1=CC3=C(C=C1)P(=S)(C1=CC=CC=C1)C1=C(C=CC=C1)S3)C1=C(C=C(C)C=C1)C21C2=C(C=CC=C2)C2=C1C=CC=C2	CC1=CC=CC=C1	0.45
O=C(C1=CC=C(N2C3=C(C=CC=C3)OC3=C2C=CC=C3)C=C1)C1=CC=C(N2C3=C(C=CC=C3)OC3=C2C=CC=C3)C=C1	CC1=CC=CC=C1	0.44
CC1=CC(C)=C(B(C2=C(C)C=C(C)C=C2C)C3=C(C)C=C(N(C4=C5C=CC=C4)C6=C(O5)C=CC=C6)C=C3C)C(C)=C1	CC1=CC=CC=C1	0.44
C12=C(N(C3=C(O2)C=CC=C3)C4=CC=C(C=C4)C5=NN=C(O5)C6=CC=C(N(C7=C(O8)C=CC=C7)C9=C8C=CC=C9)C=C6)C=CC=C1	CC1=CC=CC=C1	0.431
C1=CC=C(C2=NC(C3=CC=CC=C3)=NC(C3=CC(N4C5=C(C=CC=C5)C5=C4C=CC=C5)=CC(N4C5=C(C=CC=C5)C5=C4C=CC=C5)=C3)=N2)C=C1	CC1=CC=CC=C1	0.43
FC(C1=C(N2C3=C(C=CC=C3)C4=C2C=CC=C4)C(N5C6=C(C=CC=C6)C7=C5C=CC=C7)=C(N8C9=C(C=CC=C9)C%10=C8C=CC=C%10)C(N%11C%12=C(C=CC=C%12)C%13=C%11C=CC=C%13)=C1N%14C%15=C(C=CC=C%15)C%16=C%14C=CC=C%16)(F)F	CC1=CC=CC=C1	0.43
CC1=CC=C(S(=O)(=O)C2=CC(N3C4=C(C=C(C(C)(C)C)C=C4)C4=C3C=CC(C(C)(C)C)=C4)=NC(N3C4=C(C=C(C(C)(C)C)C=C4)C4=C3C=CC(C(C)(C)C)=C4)=C2)C=C1	CC1=CC=CC=C1	0.429
N#CC1=CC(C#N)=C(N2C3=C(C=CC=C3)C3=C2C=CC=C3)C=C1N1C2=C(C=CC=C2)C2=C1C=CC=C2	CC1=CC=CC=C1	0.4
CC1=CC2=C(C=C1)N(C1=CC3=C(C=C1)P(=O)(C1=CC=CC=C1)C1=C(C=CC=C1)O3)C1=C(C=C(C)C=C1)C21C2=C(C=CC=C2)C2=C1C=CC=C2	CC1=CC=CC=C1	0.4
O=C(C1=CC=C(C=C1)N2C3=C(C4=C2C=CC(N5C6=CC=CC=C6C7=C5C=CC=C7)=C4)C=CC=C3)C8=CC=C(C=C8)N9C%10=C(C%11=C9C=CC=C%11)C=C(N%12C%13=CC=CC=C%13C%14=C%12C=CC=C%14)C=C%10	CC1=CC=CC=C1	0.38
CC(C)(C)C1=CC2=C(C=C1)N(C1=CC=CC=C1C1=NC(C3=CC=CC=C3)=NC(C3=CC=CC=C3)=N1)C1=C2C=C(C(C)(C)C)C=C1	CC1=CC=CC=C1	0.38
N#CC1=C(C#N)C=C(N2C3=C(C=CC=C3)C3=C2C=CC=C3)C(N2C3=C(C=CC=C3)C3=C2C=CC=C3)=C1	CC1=CC=CC=C1	0.38
CC1=CC=C(S(=O)(=O)C2=CC(N3C4=C(C=CC=C4)C4=C3C=CC=C4)=NC(N3C4=C(C=CC=C4)C4=C3C=CC=C4)=C2)C=C1	CC1=CC=CC=C1	0.375
CC1(C2=C(N(C3=C1C=CC=C3)C4=CC5=C(P(C6=CC=CC=C6)(C7=CC=CC=C7O5)=O)C=C4)C=CC=C2)C	CC1=CC=CC=C1	0.37
CC1(C)C2=C(C=CC=C2)N(C2=CC3=C(C=C2)C2=C(N=CC=N2)C2=C3C=C(N3C4=C(C=CC=C4)C(C)(C)C4=C3C=CC=C4)C=C2)C2=C1C=CC=C2	CC1=CC=CC=C1	0.36
O=C(C1=CC=C(N2C3=C(C=CC=C3)OC3=C2C=CC=C3)C=C1)C1=CC=CC(C(=O)C2=CC=C(N3C4=C(C=CC=C4)OC4=C3C=CC=C4)C=C2)=C1	CC1=CC=CC=C1	0.36
CC1=CC(C)=C(B(C2=C(C)C=C(C)C=C2C)C2=C(C)C=C(N3C4=C(C=CC=C4)C(C)(C)C4=C3C=CC=C4)C=C2C)C(C)=C1	CC1=CC=CC=C1	0.36
CC1=CC2=C(C=C1)N(C1=C(C)C=C(C3=NC(C4=CC=CC=C4)=NC(C4=CC=CC=C4)=N3)C=C1C)C1=C2C=C(C)C=C1	CC1=CC=CC=C1	0.35
CC1=CC2=C(C=C1)N(C1=C(C#N)C(N3C4=C(C=C(C)C=C4)C4=C3CCC(C)=C4)=CC=C1)C1=C2C=C(C)C=C1	CC1=CC=CC=C1	0.34
CC(C)(C)C1=CC2=C(C(N3C4=CC=C(C=C4C5=C3C=CC(C(C)(C)C)=C5)C(C)(C)C)=C1)N(C6=NC7=NC(N8C9=C(C=C(C=C9C%10=C8C=CC(C(C)(C)C)=C%10)C(C)(C)C)N%11C%12=CC=C(C=C%12C%13=C%11C=CC(C(C)(C)C)=C%13)C(C)(C)C)=CC=C7C=C6)C%14=C2C=C(C(C)(C)C)C=C%14	CC1=CC=CC=C1	0.33
CC(C)(C)C1=CC2=C(C=C1)N(C1=C(C#N)C(N3C4=C(C=C(C(C)(C)C)C=C4)C4=C3CCC(C(C)(C)C)=C4)=CC=C1)C1=C2C=C(C(C)(C)C)C=C1	CC1=CC=CC=C1	0.32
C1=CC2=C(C=C1)N(C1=CC3=C(C=C1)C1=C(N=CC=N1)C1=C3C=C(N3C4=C(C=CC=C4)OC4=C3C=CC=C4)C=C1)C1=C(C=CC=C1)O2	CC1=CC=CC=C1	0.3
C1(C2=NN=C(O2)C3=CC=C(N(C4=C(O5)C=CC=C4)C6=C5C=CC=C6)C=C3)=CC=CC=C1	CC1=CC=CC=C1	0.298
CC1=CC(C)=C(B(C2=C(C)C=C(C)C=C2C)C2=C(C)C=C(N3C4=C(C=CC=C4)C(C4=CC=CC=C4)(C4=CC=CC=C4)C4=C3C=CC=C4)C=C2C)C(C)=C1	CC1=CC=CC=C1	0.29
C1(N2C3=C(C=CC=C3)OC4=C2C=CC=C4)=CC=C(C=C1)C5=NC6=CC7=C(C8C9=C(C7C%10=C8C=CC=C%10)C=CC=C9)C=C6N=C5C%11=CC=C(N%12C%13=C(C=CC=C%13)OC%14=C%12C=CC=C%14)C=C%11	CC1=CC=CC=C1	0.287
CCCCN1C(C2=CC=C(C3=CC=CC(C1=O)=C23)OC4=C(C)C=CC=C4C)=O	CC1=CC=CC=C1	0.2761
CC(C)(C)C1=CC=C2OC3=C4B(C2=C1)C1=C(C=CC(C(C)(C)C)=C1)OC4=CC(C1=C(N2C4=C(C=CC=C4)C4=C2C=CC=C4)C=C(N2C4=C(C=CC=C4)C4=C2C=CC=C4)C=C1)C3	CC1=CC=CC=C1	0.264
CC1(C)C2=C(C=CC=C2)N(C2=CC3=C(C=C2)C2=C(C=C(N4C5=C(C=CC=C5)C(C)(C)C5=C4C=CC=C5)C=C2)C2=C3N=CC=N2)C2=C1C=CC=C2	CC1=CC=CC=C1	0.26
CC(C)(C1=CC2=C(N(C3=C2C=C(C=C3)C(C)(C)C)C4=CC(C(F)(F)F)=C(C=C4)C5=C(C=C(C=C5)N6C7=C(C8=C6C=CC(C(C)(C)C)=C8)C=C(C=C7)C(C)(C)C)C(F)(F)F)C=C1)C	CC1=CC=CC=C1	0.25
CCN1C2=CC=CC=C2C3=CC4=C(C(C5=CC=CC=C5)=C31)N(C6=C4C=CC=C6)C(C=C7)=CC=C7C8=NC(C9=CC=CC=C9)=NC(C%10=CC=CC=C%10)=N8	CC1=CC=CC=C1	0.23
O=C(C1=CC=C(N2C3=C(C=CC=C3)C3=C2C=CC=C3)C=C1)C1=CC=C(N2C3=C(C=CC=C3)C3=C2C=CC=C3)C=C1	CC1=CC=CC=C1	0.21
CC(C)(C)C1=CC2=C(C=C1)N(C1=NC=NC(N3C4=C(C=C(C(C)(C)C)C=C4)C4=C3C=CC(C(C)(C)C)=C4)=C1C#N)C1=C2C=C(C(C)(C)C)C=C1	CC1=CC=CC=C1	0.21
CC(C)(C1=CC=C2OC3=C4B(C5=C(OC4=CC(C3)C6=CC=C(C=C6N7C8=C(C9=C7C=CC=C9)C(C%10=C%11C=CC=C%10)=C(C%11(C)C)C=C8)N%12C%13=C(C%14=C%12C=CC=C%14)C=C(C%15=C(C%16(C)C)C=CC=C%15)C%16=C%13)C=CC(C(C)(C)C)=C5)C2=C1)C	CC1=CC=CC=C1	0.207
CC1=CC=C(C(=O)C2=CC(C3=CC=C(N4C5=C(C=CC=C5)C(C)(C)C5=C4C=CC=C5)C=C3)=C(C(=O)C3=CC=C(C)C=C3)C=C2C2=CC=C(N3C4=C(C=CC=C4)C(C)(C)C4=C3C=CC=C4)C=C2)C=C1	CC1=CC=CC=C1	0.2
CC(C)(C)C1=CC2=C(N(C3=C2C=C(C=C3)C(C)(C)C)C4=NC5=NC=CC=C5C=C4)C(N6C7=CC=C(C(C)(C)C)C=C7C8=C6C=CC(C(C)(C)C)=C8)=C1	CC1=CC=CC=C1	0.19
C1(N2C3=C(C=CC=C3)OC4=C2C=CC=C4)=CC5=C(C=C1)C6=NC7=CC8=C(C9C%10=C(C8C%11=C9C=CC=C%11)C=CC=C%10)C=C7N=C6C%12=C5C=C(N%13C%14=C(C=CC=C%14)OC%15=C%13C=CC=C%15)C=C%12	CC1=CC=CC=C1	0.18
FC(F)(C1=C(C(N2C3=C(C4=C2C=CC=C4)C=CC=C3)=CC(N5C6=C(C7=C5C=CC=C7)C=CC=C6)=C1N8C9=C(C%10=C8C=CC=C%10)C=CC=C9)N%11C%12=C(C%13=C%11C=CC=C%13)C=CC=C%12)F	CC1=CC=CC=C1	0.14
C1=CC=C(C2=CC=C(C3=NC(N4C5=C(C=CC=C5)C5=C4C4=C(C=C5)C5=C(C=CC=C5)N4C4=CC=CC=C4)=NC(N4C5=C(C=CC=C5)C5=C4C4=C(C=C5)C5=C(C=CC=C5)N4C4=CC=CC=C4)=N3)C=C2)C=C1	CC1=CC=CC=C1	0.1
O=C(C1=CC=C(C(=O)C2=CC=C(N3C4=C(C=CC=C4)OC4=C3C=CC=C4)C=C2)C=C1)C1=CC=C(N2C3=C(C=CC=C3)OC3=C2C=CC=C3)C=C1	CC1=CC=CC=C1	0.1
CC1=CC=C(C(=O)C2=CC(C3=CC=C(N4C5=C(C=CC=C5)OC5=C4C=CC=C5)C=C3)=C(C(=O)C3=CC=C(C)C=C3)C=C2C2=CC=C(N3C4=C(C=CC=C4)OC4=C3C=CC=C4)C=C2)C=C1	CC1=CC=CC=C1	0.1
O=C(C1=CC=CC=C1O2)C(C=C3N4C5=C(C6=C4C=CC(C(C)(C)C)=C6)C=C(C(C)(C)C)C=C5)=C2C=C3N(C7=C8C=C(OC)C=C7)C9=C8C=CC=C9	CC1=CC=CC=C1	0.07
FC1=C2N=C3C(=NC2=CC=C1)C1=C(C=C(N2C4=C(C=CC=C4)OC4=C2C=CC=C4)C=C1)C1=C3C=CC(N2C3=C(C=CC=C3)OC3=C2C=CC=C3)=C1	CC1=CC=CC=C1	0.07
N#CC1=C(N2C3=C(C=CC=C3)C3=C2C=CC=C3)N=CN=C1N1C2=C(C=CC=C2)C2=C1C=CC=C2	CC1=CC=CC=C1	0.06
COC1=CC2=C(C=C1)N(C1=CC3=C(C=C1N1C4=C(C=CC=C4)C4=C1C=CC=C4)C(=O)C1=CC=CC=C1O3)C1=C2C=CC=C1	CC1=CC=CC=C1	0.06
COC1=CC2=C(C=C1)N(C1=NC=NC(N3C4=C(C=C(OC)C=C4)C4=C3C=CC(OC)=C4)=C1C#N)C1=C2C=C(OC)C=C1	CC1=CC=CC=C1	0.03
N#CC1=C(C#N)C=C(N2C3=C(C=C(N4C5=C(C=CC=C5)OC5=C4C=CC=C5)C=C3)C3=C2C=CC(N2C4=C(C=CC=C4)OC4=C2C=CC=C4)=C3)C(N2C3=C(C=C(N4C5=C(C=CC=C5)OC5=C4C=CC=C5)C=C3)C3=C2C=CC(N2C4=C(C=CC=C4)OC4=C2C=CC=C4)=C3)=C1	CC1=CC=CC=C1	0.03
CC1(C)C2=C(C=CC=C2)N(C2=CC(C(F)(F)F)=C(C3=C(C(F)(F)F)C=C(N4C5=C(C=CC=C5)C(C)(C)C5=C4C=CC=C5)C=C3)C=C2)C2=C1C=CC=C2	CC1=CC=CC=C1	0.03
CC(C)(C)C1=CC=C(C=C1)N(C2=CC3=C(N(C4=C3C=C(C=C4)N(C5=CC=C(C=C5)C(C)(C)C)C6=CC=C(C=C6)C(C)(C)C)C7=CC(C#N)=C(C=C7N8C9=C(C%10=C8C=CC(N(C%11=CC=C(C=C%11)C(C)(C)C)C%12=CC=C(C=C%12)C(C)(C)C)=C%10)C=C(C=C9)N(C%13=CC=C(C=C%13)C(C)(C)C)C%14=CC=C(C=C%14)C(C)(C)C)C#N)C=C2)C%15=CC=C(C(C)(C)C)C=C%15	CC1=CC=CC=C1	0.02
CC(C1=CC2=C(N(C3=C(C2(C)C)C=C(C=C3)C(C)(C)C)C4=CC(C(F)(F)F)=CC(N5C6=C(C(C)(C7=C5C=CC(C(C)(C)C)=C7)C)C=C(C=C6)C(C)(C)C)=C4)C=C1)(C)C	CC1=CC=CC=C1	0.02
CC(C1=CC2=C(N(C3=C(S2)C=C(C=C3)C(C)(C)C)C4=CC(C(F)(F)F)=CC(N5C6=C(SC7=C5C=CC(C(C)(C)C)=C7)C=C(C=C6)C(C)(C)C)=C4)C=C1)(C)C	CC1=CC=CC=C1	0.01
CC1(C2=C(N(C3=C1C=C(N4C5=CC=C(C=C5C6=C4C=CC(C(C)(C)C)=C6)C(C)(C)C)C=C3)C7=CC=C(C=C7)S(=O)(C8=CC=C(C=C8)N9C%10=C(C(C)(C%11=C9C=CC(N%12C%13=CC=C(C=C%13C%14=C%12C=CC(C(C)(C)C)=C%14)C(C)(C)C)=C%11)C)C=C(N%15C%16=CC=C(C=C%16C%17=C%15C=CC(C(C)(C)C)=C%17)C(C)(C)C)C=C%10)=O)C=CC(N%18C%19=CC=C(C=C%19C%20=C%18C=CC(C(C)(C)C)=C%20)C(C)(C)C)=C2)C	CC1(C2=C(N(C3=C1C=C(N4C5=CC=C(C=C5C6=C4C=CC(C(C)(C)C)=C6)C(C)(C)C)C=C3)C7=CC=C(C=C7)S(=O)(C8=CC=C(C=C8)N9C%10=C(C(C)(C%11=C9C=CC(N%12C%13=CC=C(C=C%13C%14=C%12C=CC(C(C)(C)C)=C%14)C(C)(C)C)=C%11)C)C=C(N%15C%16=CC=C(C=C%16C%17=C%15C=CC(C(C)(C)C)=C%17)C(C)(C)C)C=C%10)=O)C=CC(N%18C%19=CC=C(C=C%19C%20=C%18C=CC(C(C)(C)C)=C%20)C(C)(C)C)=C2)C	0.675
CC1(C2=C(N(C3=C1C=C(N(C4=C(C5=C6)C=C(C=C4)N7C8=CC=C(C=C8C9=C7C=CC(C(C)(C)C)=C9)C(C)(C)C)C5=CC=C6N%10C(C=CC(C(C)(C)C)=C%11)=C%11C%12=CC(C(C)(C)C)=CC=C%12%10)C=C3)C%13=CC=C(C=C%13)S(=O)(C%14=CC=C(C=C%14)N%15C%16=C(C(C)(C%17=C%15C=CC(N(C%18=C(C%19=C%20)C=C(C=C%18)N%21C%22=CC=C(C=C%22C%23=C%21C=CC(C(C)(C)C)=C%23)C(C)(C)C)C%19=CC=C%20N%24C(C=CC(C(C)(C)C)=C%25)=C%25C%26=CC(C(C)(C)C)=CC=C%26%24)=C%17)C)…	CC1(C2=C(N(C3=C1C=C(N(C4=C(C5=C6)C=C(C=C4)N7C8=CC=C(C=C8C9=C7C=CC(C(C)(C)C)=C9)C(C)(C)C)C5=CC=C6N%10C(C=CC(C(C)(C)C)=C%11)=C%11C%12=CC(C(C)(C)C)=CC=C%12%10)C=C3)C%13=CC=C(C=C%13)S(=O)(C%14=CC=C(C=C%14)N%15C%16=C(C(C)(C%17=C%15C=CC(N(C%18=C(C%19=C%20)C=C(C=C%18)N%21C%22=CC=C(C=C%22C%23=C%21C=CC(C(C)(C)C)=C%23)C(C)(C)C)C%19=CC=C%20N%24C(C=CC(C(C)(C)C)=C%25)=C%25C%26=CC(C(C)(C)C)=CC=C%26%24)=C%17)C)…	0.482
CC1(C)C2=C(C=CC=C2)N(C2=CC3=C(C=C2)C2=C(C=C(N4C5=C(C=CC=C5)C(C)(C)C5=C4C=CC=C5)C=C2)C32C3=CC=CC=C3S(=O)(=O)C3=C2C=CC=C3)C2=C1C=CC=C2	CC1(C)C2=C(C=CC=C2)N(C2=CC3=C(C=C2)C2=C(C=C(N4C5=C(C=CC=C5)C(C)(C)C5=C4C=CC=C5)C=C2)C32C3=CC=CC=C3S(=O)(=O)C3=C2C=CC=C3)C2=C1C=CC=C2	0.42
CC1(C)C2=C(C=CC=C2)N(C2=CC=C(S(=O)(=O)C3=CC(N4C5=C(C=CC=C5)C5=C4C=CC=C5)=CC(N4C5=C(C=CC=C5)C5=C4C=CC=C5)=C3)C=C2)C2=C1C=CC=C2	CC1(C)C2=C(C=CC=C2)N(C2=CC=C(S(=O)(=O)C3=CC(N4C5=C(C=CC=C5)C5=C4C=CC=C5)=CC(N4C5=C(C=CC=C5)C5=C4C=CC=C5)=C3)C=C2)C2=C1C=CC=C2	0.54
CC(C1=CC2=C(N(C3=C2C=C(C=C3)C(C)(C)C)C4=C(C(N5C6=C(C7=C5C=CC(C(C)(C)C)=C7)C=C(C=C6)C(C)(C)C)=CC=C4)C8=NC(C9=CC=CC=C9)=NC(C%10=CC=CC=C%10)=N8)C=C1)(C)C	CC(C1=CC2=C(N(C3=C2C=C(C=C3)C(C)(C)C)C4=C(C(N5C6=C(C7=C5C=CC(C(C)(C)C)=C7)C=C(C=C6)C(C)(C)C)=CC=C4)C8=NC(C9=CC=CC=C9)=NC(C%10=CC=CC=C%10)=N8)C=C1)(C)C	0.09
CC(C)C1=CC2=C(C=C1)N(C1=CC=C(C3=C(C#N)C(OC4=CC(C5=CC=C(N6C7=C(C=C(C(C)(C)C)C=C7)C7=C6C=CC(C(C)(C)C)=C7)C=C5)=CC=C4)=CC=C3)C=C1)C1=C2C=C(C(C)(C)C)C=C1	CC(C)C1=CC2=C(C=C1)N(C1=CC=C(C3=C(C#N)C(OC4=CC(C5=CC=C(N6C7=C(C=C(C(C)(C)C)C=C7)C7=C6C=CC(C(C)(C)C)=C7)C=C5)=CC=C4)=CC=C3)C=C1)C1=C2C=C(C(C)(C)C)C=C1	0.82
CC(C)C1=CC(N2C3=CC=CC=C3C3(C4=C(C=CC=C4)C4=C3C=CC=C4)C3=C2C=CC=C3)=CC(C(C)C)=C1B1C2=C(C=CC=C2)C2(C3=C1C=CC=C3)C1=C(C=CC=C1)C1=C2C=CC=C1	CC(C)C1=CC(N2C3=CC=CC=C3C3(C4=C(C=CC=C4)C4=C3C=CC=C4)C3=C2C=CC=C3)=CC(C(C)C)=C1B1C2=C(C=CC=C2)C2(C3=C1C=CC=C3)C1=C(C=CC=C1)C1=C2C=CC=C1	0.84
CC(C)C1=CC(C(C)C)=C(B2C3=CC=CC=C3OC3=C2C=CC(N2C4=CC=CC=C4C4=C2C2=C(C5=C4N(C4=CC=CC=C4)C4=C5C=CC=C4)N(C4=CC=CC=C4)C4=C2C=CC=C4)=C3)C(C(C)C)=C1	CC(C)C1=CC(=C(C(=C1)C(C)C)C2=CN=C(C=C2)N3C4=CC=CC=C4N5C3=NC6=CC=CC=C65)C(C)C	0.785
CC(C)(C1=CC2=C(OC3=CC(N4C5=C(C6=C4C=CC(C(C)(C)C)=C6)C=C(C=C5)C(C)(C)C)=CC7=C3B2C8=C(O7)C=CC(C(C)(C)C)=C8)C=C1)C	CC(C)(C1=CC2=C(OC3=CC(N4C5=C(C6=C4C=CC(C(C)(C)C)=C6)C=C(C=C5)C(C)(C)C)=CC7=C3B2C8=C(O7)C=CC(C(C)(C)C)=C8)C=C1)C	0.411
CC(C)(C1=CC=C2OC3=C4B(C5=C(OC4=CC(C3)C6=CC=C(C=C6N7C8=C(C9=C7C=CC=C9)C(OC%10=C%11C=CC=C%10)=C%11C=C8)N%12C%13=C(C%14=C%12C=CC=C%14)C(O%15)=C(C%16=C%15C=CC=C%16)C=C%13)C=CC(C(C)(C)C)=C5)C2=C1)C	CC(C)(C1=CC=C2OC3=C4B(C5=C(OC4=CC(C3)C6=CC=C(C=C6N7C8=C(C9=C7C=CC=C9)C(OC%10=C%11C=CC=C%10)=C%11C=C8)N%12C%13=C(C%14=C%12C=CC=C%14)C(O%15)=C(C%16=C%15C=CC=C%16)C=C%13)C=CC(C(C)(C)C)=C5)C2=C1)C	0.864
CC(C)(C1=CC=C2OC3=C4B(C5=C(OC4=CC(C3)C6=CC=C(C=C6N7C8=C(C9=C7C=CC=C9)C(C%10=C%11C=CC=C%10)=C(C%11(C)C)C=C8)N%12C%13=C(C%14=C%12C=CC=C%14)C=C(C%15=C(C%16(C)C)C=CC=C%15)C%16=C%13)C=CC(C(C)(C)C)=C5)C2=C1)C	CC(C)(C1=CC=C2OC3=C4B(C5=C(OC4=CC(C3)C6=CC=C(C=C6N7C8=C(C9=C7C=CC=C9)C(C%10=C%11C=CC=C%10)=C(C%11(C)C)C=C8)N%12C%13=C(C%14=C%12C=CC=C%14)C=C(C%15=C(C%16(C)C)C=CC=C%15)C%16=C%13)C=CC(C(C)(C)C)=C5)C2=C1)C	0.755
CC(C)(C)C1=CC2=C(C=C1)OC1=CC(N3C4=C(C=C(C5=CC=C6C(=C5)C5=C(C=CC=C5)N6C5=CC=CC=C5)C=C4)C4=C3C=CC(C3=CC5=C(C=C3)N(C3=CC=CC=C3)C3=C5C=CC=C3)=C4)=CC3=C1B2C1=C(C=CC(C(C)(C)C)=C1)O3	CC(C)(C)C1=CC2=C(C=C1)OC1=CC(N3C4=C(C=C(C5=CC=C6C(=C5)C5=C(C=CC=C5)N6C5=CC=CC=C5)C=C4)C4=C3C=CC(C3=CC5=C(C=C3)N(C3=CC=CC=C3)C3=C5C=CC=C3)=C4)=CC3=C1B2C1=C(C=CC(C(C)(C)C)=C1)O3	0.915
CC(C)(C)C1=CC2=C(C=C1)OC1=CC(CN3C4=C(C=C(N(C5=CC=CC=C5)C5=CC=CC=C5)C=C4)C4=C3C=CC(N(C3=CC=CC=C3)C3=CC=CC=C3)=C4)=CC3=C1B2C1=C(C=CC(C(C)(C)C)=C1)O3	CC(C)(C)C1=CC2=C(C=C1)OC1=CC(CN3C4=C(C=C(N(C5=CC=CC=C5)C5=CC=CC=C5)C=C4)C4=C3C=CC(N(C3=CC=CC=C3)C3=CC=CC=C3)=C4)=CC3=C1B2C1=C(C=CC(C(C)(C)C)=C1)O3	0.89
CC(C)(C)C1=CC2=C(C=C1)N(C1=NC=NC(N3C4=C(C=C(C(C)(C)C)C=C4)C4=C3C=CC(C(C)(C)C)=C4)=C1C#N)C1=C2C=C(C(C)(C)C)C=C1	CC(C)(C)C1=CC2=C(C=C1)N(C1=NC=NC(N3C4=C(C=C(C(C)(C)C)C=C4)C4=C3C=CC(C(C)(C)C)=C4)=C1C#N)C1=C2C=C(C(C)(C)C)C=C1	0.25
CC(C)(C)C1=CC2=C(C=C1)N(C1=CC=CC=C1C1=NC(C3=CC=CC=C3)=NC(C3=CC=CC=C3)=N1)C1=C2C=C(C(C)(C)C)C=C1	CC(C)(C)C1=CC2=C(C=C1)N(C1=CC=CC=C1C1=NC(C3=CC=CC=C3)=NC(C3=CC=CC=C3)=N1)C1=C2C=C(C(C)(C)C)C=C1	0.13
CC(C)(C)C1=CC2=C(C=C1)N(C1=CC=C(C3=C4C=CC=CC4=C(C4=CC=C(C5=NC6=C(C7=C(C=CC=C7)C7=C6C=CC=C7)N5C5=CC=C(C#N)C=C5)C=C4)C4=C3C=CC=C4)C=C1)C1=C2C=C(C(C)(C)C)C=C1	CC(C)(C)C1=CC2=C(C=C1)N(C1=CC=C(C3=C4C=CC=CC4=C(C4=CC=C(C5=NC6=C(C7=C(C=CC=C7)C7=C6C=CC=C7)N5C5=CC=C(C#N)C=C5)C=C4)C4=C3C=CC=C4)C=C1)C1=C2C=C(C(C)(C)C)C=C1	0.49
CC(C)(C)C1=CC2=C(C=C1)N(C1=CC(N3C4=C(C=C(C(C)(C)C)C=C4)C4=C3C=CC(C(C)(C)C)=C4)=C(N3C4=C(C=CC=C4)C4=C3C=CC=C4)C(C#N)=C1N1C3=C(C=CC=C3)C3=C1C=CC=C3)C1=C2C=C(C(C)(C)C)C=C1	CC(C)(C)C1=CC2=C(C=C1)N(C1=CC(N3C4=C(C=C(C(C)(C)C)C=C4)C4=C3C=CC(C(C)(C)C)=C4)=C(N3C4=C(C=CC=C4)C4=C3C=CC=C4)C(C#N)=C1N1C3=C(C=CC=C3)C3=C1C=CC=C3)C1=C2C=C(C(C)(C)C)C=C1	0.66
CC(C)(C)C1=CC=C2OC3=C4B(C2=C1)C1=C(C=CC(C(C)(C)C)=C1)OC4=CC(C1=C(N2C4=C(C=CC=C4)C4=C2C=CC=C4)C=C(N2C4=C(C=CC=C4)C4=C2C=CC=C4)C=C1)C3	CC(C)(C)C1=CC=C2OC3=C4B(C2=C1)C1=C(C=CC(C(C)(C)C)=C1)OC4=CC(C1=C(N2C4=C(C=CC=C4)C4=C2C=CC=C4)C=C(N2C4=C(C=CC=C4)C4=C2C=CC=C4)C=C1)C3	0.61
CC(C)(C)C1=CC=C(C2=CC3=C(C=C2)N(C2=CC4=C5B(C6=C(C=CC(C(C)(C)C)=C6)OC5=C2)C2=C(C=CC(C(C)(C)C)=C2)O4)C2=C3C=C(C3=CC=C(C(C)(C)C)C=C3)C=C2)C=C1	CC(C)(C)C1=CC=C(C2=CC3=C(C=C2)N(C2=CC4=C5B(C6=C(C=CC(C(C)(C)C)=C6)OC5=C2)C2=C(C=CC(C(C)(C)C)=C2)O4)C2=C3C=C(C3=CC=C(C(C)(C)C)C=C3)C=C2)C=C1	0.498
C1=CC=C(C2=NC(C3=CC=CC=C3)=NC(C3=CC=C(N4C5=C(C=CC=C5)C5=C4C=CC(C4=CC6=C(C=C4)N(C4=CC=C(C7=NC(C8=CC=CC=C8)=NC(C8=CC=CC=C8)N7)C=C4)C4=C6C=CC=C4)=C5)C=C3)=N2)C=C1	C1CCOC1	0.87
C1=CC=C(C2=NC(C3=CC=CC=C3)=NC(C3=CC=C(N4C5=C(C=CC=C5)C5=C4C=CC(C4=CC6=C(C=C4)C4=C(C=CC=C4)N6C4=CC=C(C6=NC(C7=CC=CC=C7)=NC(C7=CC=CC=C7)=N6)C=C4)=C5)C=C3)=N2)C=C1	C1CCOC1	0.82
CC(C)(C)C1=CC2=C(C=C1)N(C1=CC=C(C3=C4C=CC=CC4=C(C4=CC=C(C5=NC6=C(C7=C(C=CC=C7)C7=C6C=CC=C7)N5C5=CC=C(C#N)C=C5)C=C4)C4=C3C=CC=C4)C=C1)C1=C2C=C(C(C)(C)C)C=C1	C1CCOC1	0.82
C1=CC=C(C2=NC(C3=CC=CC=C3)=NC(C3=CC=C(N4C5=C(C=CC=C5)C5=C4C=CC(C4=CC=CC6=C4C4=C(C=CC=C4)N6C4=CC=C(C6=NC(C7=CC=CC=C7)=NC(C7=CC=CC=C7)=N6)C=C4)=C5)C=C3)=N2)C=C1	C1CCOC1	0.65
C12=CC=CC=C1C(C=C3C=CC=CC3=C4C5=C6NC7=CC=CC=C7C6=CC8=CC=CC=C85)=C4N2	C1CCOC1	0.62
O=C(C1=CC=CC=C1)C1=CC=C(N(C2=CC=CC=C2)C2=CC=C3C=CC=CC3=C2C2=C3C=CC=CC3=CC=C2N(C2=CC=CC=C2)C2=CC=C(C(=O)C3=CC=CC=C3)C=C2)C=C1	C1CCOC1	0.33
N#CC1=C2C(=C(C#N)C3=C1N(C1=CC=CC=C1)C1=CC=C4C=CC=CC4=C1C1=C(C=CC4=CC=CC=C41)N3C1=CC=CC=C1)N(C1=CC=CC=C1)C1=C(C3=CC=CC=C3C=C1)C1=C3C=CC=CC3=CC=C1N2C1=CC=CC=C1	C1CCOC1	0.24
C1=CC=C(NC2=CC=C3C=CC=CC3=C2C2=C(NC3=CC=CC=C3)C=CC3=CC=CC=C32)C=C1	C1CCOC1	0.16
O=C(C1=CC=C(N(C2=CC=CC=C2)C2=CC=CC3=C2C=CC=C3)C=C1)C1=CC=C(N(C2=CC=CC=C2)C2=CC=CC3=C2C=CC=C3)C=C1	C1CCOC1	0.09
O=C(C1=CC=CC=C1)C1=CC=C(N2C3=C(C=CC=C3)C3=C2C(C2=C4C=CC=CC4=CC4=C2N(C2=CC=C(C(=O)C5=CC=CC=C5)C=C2)C2=C4C=CC=C2)=C2C=CC=CC2=C3)C=C1	C1CCOC1	0.06
COC1=CC2=C(C=C1)N(C1=CC3=C(C=C1N1C4=C(C=CC=C4)C4=C1C=CC=C4)C(=O)C1=CC=CC=C1O3)C1=C2C=CC=C1	C1CCOC1	0.03
O=C(C1=CC=CC=C1O2)C(C=C3N4C5=C(C6=C4C=CC(C(C)(C)C)=C6)C=C(C(C)(C)C)C=C5)=C2C=C3N(C7=C8C=C(OC)C=C7)C9=C8C=CC=C9	C1CCOC1	0.01
O=C(N(C1=O)CC(CCCC)CC)C2=CC=C(N3C4=CC=CC=C4OC5=C3C=CC=C5)C6=CC=CC1=C26	C1CCOC1	0.01
O=C(C1=CC=C(C2=CC=CC3=C12)N4C5=CC=C(C(C)(C)C)C=C5SC6=C4C=CC(C(C)(C)C)=C6)N(CC(CC)CCCC)C3=O	C1CCOC1	0.01
O=S(=O)(C1=CC=C(N2C3=C(C=CC=C3)C3=C2C=CC=C3)C=C1)C1=CC=NC(N2C3=C(C=CC=C3)C3=C2C=CC=C3)=C1	C1CCCCC1	0.42
O=S(=O)(C1=CC=C(N2C3=C(C=CC=C3)C3=C2C=CC=C3)C=C1)C1=CC=C(N2C3=C(C=CC=C3)C3=C2C=CC=C3)C=N1	C1CCCCC1	0.32
O=S(=O)(C1=CC=C(N2C3=C(C=CC=C3)C3=C2C=CC=C3)C=C1)C1=NC=CC=C1	C1CCCCC1	0.21
O=S(=O)(C1=CC=C(N2C3=C(C=CC=C3)C3=C2C=CC=C3)C=C1)C1=CC=CC(N2C3=C(C=CC=C3)C3=C2C=CC=C3)=N1	C1CCCCC1	0.098
O=S(=O)(C1=CC=C(N2C3=C(C=CC=C3)C3=C2C=CC=C3)C=C1)C1=CN=CC(N2C3=C(C=CC=C3)C3=C2C=CC=C3)=C1	C1CCCCC1	0.037
O=C1C2=CC(C3=CC=C(C=C3)N(C4=CC=CC=C4)C5=CC=C(C6=CC7=C(C=C6)S(=O)(C8=C(C=CC=C8)C7=O)=O)C=C5)=CC=C2S(=O)(C9=C1C=CC=C9)=O	C1=CC=C2C(=C1)C3=CC=CC=C3N2C4=CC=CC(=C4)C5=CC(=CN=C5)C6=CC(=CC=C6)N7C8=CC=CC=C8C9=CC=CC=C97	0.7
O=C1C2=CC(C3=CC4=C(N(C5=CC=C(C=C54)C6=CC7=C(S(=O)(C8=C(C7=O)C=CC=C8)=O)C=C6)C9=CC=CC=C9)C=C3)=CC=C2S(=O)(C%10=C1C=CC=C%10)=O	C1=CC=C2C(=C1)C3=CC=CC=C3N2C4=CC=CC(=C4)C5=CC(=CN=C5)C6=CC(=CC=C6)N7C8=CC=CC=C8C9=CC=CC=C97	0.543
O=C1C2=CC=CC=C2S(=O)(C3=C1C=CC=C3C4=CC=C(C=C4)N(C5=CC=CC=C5)C6=CC=C(C=C6)C7=CC=CC(C8=O)=C7S(C9=C8C=CC=C9)(=O)=O)=O	C1=CC=C2C(=C1)C3=CC=CC=C3N2C4=CC=CC(=C4)C5=CC(=CN=C5)C6=CC(=CC=C6)N7C8=CC=CC=C8C9=CC=CC=C97	0.532
O=C1C2=CC=CC=C2S(=O)(C3=C1C=CC=C3C4=CC5=C(N(C6=CC=C(C7=CC=CC(C8=O)=C7S(C9=C8C=CC=C9)(=O)=O)C=C65)C%10=CC=CC=C%10)C=C4)=O	C1=CC=C2C(=C1)C3=CC=CC=C3N2C4=CC=CC(=C4)C5=CC(=CN=C5)C6=CC(=CC=C6)N7C8=CC=CC=C8C9=CC=CC=C97	0.486
N#CC1=CC=C2C(=C1)C1=C(C=CC(C#N)=C1)C1=C2NC2C=C(N3C4=C(C=CC=C4)C4(C5=C(C=CC=C5)C5=C4C=CC=C5)C4=C3C=CC=C4)C=CC2=N1	C1=CC=C2C(=C1)C3=CC=CC=C3N2C4=CC=CC(=C4)C5=CC(=CC=C5)N6C7=CC=CC=C7C8=CC=CC=C86	0.982
N(C1=CC=CC=C1)(C2=CC3=C4B(C5=CC6=C(C=C5S3)OC7=C8B6C9=C(C=CC=C9)N(C8=CC(N(C%10=CC=CC=C%10)C%11=CC=CC=C%11)=C7)C%12=CC=CC=C%12)C%13=C(C=CC=C%13)N(C4=C2)C%14=CC=CC=C%14)C%15=CC=CC=C%15	C1=CC=C2C(=C1)C3=CC=CC=C3N2C4=CC=CC(=C4)C5=CC(=CC=C5)N6C7=CC=CC=C7C8=CC=CC=C86	0.93
N#CC1=NC2=C(N=C1C#N)C1=C(C=C(N3C4=C(C=CC=C4)C4(C5=C(C=CC=C5)C5=C4C=CC=C5)C4=C3C=CC=C4)C=C1)C1=CC(N3C4=C(C=CC=C4)C4(C5=C(C=CC=C5)C5=C4C=CC=C5)C4=C3C=CC=C4)=CC=C12	C1=CC=C2C(=C1)C3=CC=CC=C3N2C4=CC=CC(=C4)C5=CC(=CC=C5)N6C7=CC=CC=C7C8=CC=CC=C86	0.91
CC(C)(C)C1=CC2=C(C=C1)SC1=C3B2C2=C(C=CC(C(C)(C)C)=C2)N2C4=C(C=C(C(C)(C)C)C=C4)B4C5=C(C=CC(C(C)(C)C)=C5)SC(=C1)C4=C32	C1=CC=C2C(=C1)C3=CC=CC=C3N2C4=CC=CC(=C4)C5=CC(=CC=C5)N6C7=CC=CC=C7C8=CC=CC=C86	0.89
N(C1=CC=CC=C1)(C2=CC3=C4B(C5=CC6=C(C=C5S3)SC7=C8B6C9=C(C=CC=C9)N(C8=CC(N(C%10=CC=CC=C%10)C%11=CC=CC=C%11)=C7)C%12=CC=CC=C%12)C%13=C(C=CC=C%13)N(C4=C2)C%14=CC=CC=C%14)C%15=CC=CC=C%15	C1=CC=C2C(=C1)C3=CC=CC=C3N2C4=CC=CC(=C4)C5=CC(=CC=C5)N6C7=CC=CC=C7C8=CC=CC=C86	0.88
CC(C)(C)C1=CC2=C(C=C1)N(C1=CC(N3C4=C(C=C(C(C)(C)C)C=C4)C4=C3C=CC(C(C)(C)C)=C4)=C(N3C4=C(C=CC=C4)C4=C3C=CC=C4)C(C#N)=C1N1C3=C(C=CC=C3)C3=C1C=CC=C3)C1=C2C=C(C(C)(C)C)C=C1	C1=CC=C2C(=C1)C3=CC=CC=C3N2C4=CC=CC(=C4)C5=CC(=CC=C5)N6C7=CC=CC=C7C8=CC=CC=C86	0.87
CC(C)(C1=CC2=C(N3C4=C(C(C5=CC(N6C7=C(C8=C6C=CC=C8)C=CC=C7)=CC=C53)=O)C=C(C=C24)C(C)(C)C)C=C1)C	C1=CC=C2C(=C1)C3=CC=CC=C3N2C4=CC=CC(=C4)C5=CC(=CC=C5)N6C7=CC=CC=C7C8=CC=CC=C86	0.8111
CC1(C)C2=C(C=CC=C2)N(C2=CC3=C(C=C2)C2=NC4=CC=CC(F)=C4N=C2C2=C3C=C(N3C4=C(C=CC=C4)C(C)(C)C4=C3C=CC=C4)C=C2)C2=C1C=CC=C2	C1=CC=C2C(=C1)C3=CC=CC=C3N2C4=CC=CC(=C4)C5=CC(=CC=C5)N6C7=CC=CC=C7C8=CC=CC=C86	0.78
CC(C)(C1=CC2=C(N3C4=C(C(C5=C(N6C7=C(C8=C6C=CC=C8)C=CC=C7)C=CC=C53)=O)C=C(C=C24)C(C)(C)C)C=C1)C	C1=CC=C2C(=C1)C3=CC=CC=C3N2C4=CC=CC(=C4)C5=CC(=CC=C5)N6C7=CC=CC=C7C8=CC=CC=C86	0.775
O=C(C1=CC=C(N2C3=C(C=CC=C3)OC3=C2C=CC=C3)C=C1)C1=CC=CC(C(=O)C2=CC=C(N3C4=C(C=CC=C4)OC4=C3C=CC=C4)C=C2)=C1	C1=CC=C2C(=C1)C3=CC=CC=C3N2C4=CC=CC(=C4)C5=CC(=CC=C5)N6C7=CC=CC=C7C8=CC=CC=C86	0.71
N(C1=CC=CC=C1)(C2=CC=CC=C2)C3=CC4=C5B(C6=C(N(C7=CC=CC=C7)C5=C3)C=CC=C6)C8=CC9=C(OC%10=C%11B9C%12=C(N(C%13=CC=CC=C%13)C%11=CC(N(C%14=CC=CC=C%14)C%15=CC=CC=C%15)=C%10)C=CC=C%12)C=C8O4	C1=CC=C2C(=C1)C3=CC=CC=C3N2C4=CC=CC(=C4)C5=CC(=CC=C5)N6C7=CC=CC=C7C8=CC=CC=C86	0.64
CC(C)(C1=CC2=C(N(C3=C2C=C(C=C3)C(C)(C)C)C4=CC5=C(C6=NC7=C(F)C=CC=C7N=C6C8=C5C=C(C=C8)N9C%10=C(C%11=C9C=CC(C(C)(C)C)=C%11)C=C(C=C%10)C(C)(C)C)C=C4)C=C1)C	C1=CC=C2C(=C1)C3=CC=CC=C3N2C4=CC=CC(=C4)C5=CC(=CC=C5)N6C7=CC=CC=C7C8=CC=CC=C86	0.6
FC1=C2N=C3C(=NC2=CC=C1)C1=C(C=C(N2C4=C(C=CC=C4)OC4=C2C=CC=C4)C=C1)C1=C3C=CC(N2C3=C(C=CC=C3)OC3=C2C=CC=C3)=C1	C1=CC=C2C(=C1)C3=CC=CC=C3N2C4=CC=CC(=C4)C5=CC(=CC=C5)N6C7=CC=CC=C7C8=CC=CC=C86	0.58
CC(C)(C1=CC2=C(N3C4=C(C(C5=CC=CC(N(C6=CC=CC=C6)C7=CC=CC=C7)=C53)=O)C=C(C=C24)C(C)(C)C)C=C1)C	C1=CC=C2C(=C1)C3=CC=CC=C3N2C4=CC=CC(=C4)C5=CC(=CC=C5)N6C7=CC=CC=C7C8=CC=CC=C86	0.511
O=C1C2=CC=CC=C2N2C3=C(C=CC=C13)C(=O)C1=C2C(C2=CC=C(N3C4=CC=CC=C4C4=C3C=CC=C4)C=C2)=CC=C1	C1=CC=C2C(=C1)C3=CC=CC=C3N2C4=CC=CC(=C4)C5=CC(=CC=C5)N6C7=CC=CC=C7C8=CC=CC=C86	0.466
CC1=CC=C(C(=O)C2=CC(C3=CC=C(N4C5=C(C=CC=C5)C(C)(C)C5=C4C=CC=C5)C=C3)=C(C(=O)C3=CC=C(C)C=C3)C=C2C2=CC=C(N3C4=C(C=CC=C4)C(C)(C)C4=C3C=CC=C4)C=C2)C=C1	C1=CC=C2C(=C1)C3=CC=CC=C3N2C4=CC=CC(=C4)C5=CC(=CC=C5)N6C7=CC=CC=C7C8=CC=CC=C86	0.46
C1=CC=C([Si]2(C3=CC=CC=C3)C3=C(C=CC=C3)N(C3=CC4=C(C=C3)C=CC3=NC5=C(N=C34)C3=C(C=CC(N4C6=C(C=CC=C6)[Si](C6=CC=CC=C6)(C6=CC=CC=C6)C6=C4C=CC=C6)=C3)C=C5)C3=C2C=CC=C3)C=C1	C1=CC=C2C(=C1)C3=CC=CC=C3N2C4=CC=CC(=C4)C5=CC(=CC=C5)N6C7=CC=CC=C7C8=CC=CC=C86	0.387
O=C(C1=CC=C(C(=O)C2=CC=C(N3C4=C(C=CC=C4)OC4=C3C=CC=C4)C=C2)C=C1)C1=CC=C(N2C3=C(C=CC=C3)OC3=C2C=CC=C3)C=C1	C1=CC=C2C(=C1)C3=CC=CC=C3N2C4=CC=CC(=C4)C5=CC(=CC=C5)N6C7=CC=CC=C7C8=CC=CC=C86	0.36
C1(N2C3=C(C=CC=C3)OC4=C2C=CC=C4)=CC5=C(C=C1)C6=NC7=CC8=C(C9C%10=C(C8C%11=C9C=CC=C%11)C=CC=C%10)C=C7N=C6C%12=C5C=C(N%13C%14=C(C=CC=C%14)OC%15=C%13C=CC=C%15)C=C%12	C1=CC=C2C(=C1)C3=CC=CC=C3N2C4=CC=CC(=C4)C5=CC(=CC=C5)N6C7=CC=CC=C7C8=CC=CC=C86	0.339
CC([Si]1(C(C)C)C2=C(N(C3=C1C=CC=C3)C4=CC5=C(C=CC6=C5N=C7C(C=CC8=C7C=C(C=C8)N9C%10=C([Si](C(C)C)(C%11=C9C=CC=C%11)C(C)C)C=CC=C%10)=N6)C=C4)C=CC=C2)C	C1=CC=C2C(=C1)C3=CC=CC=C3N2C4=CC=CC(=C4)C5=CC(=CC=C5)N6C7=CC=CC=C7C8=CC=CC=C86	0.325
C12=CC=CC=C1OC3=CC=CC=C3[Si]24C5=CC=CC=C5N(C6=CC7=C(C=C6)C=CC8=NC9=C(N=C87)C%10=C(C=CC(N%11C%12=CC=CC=C%12[Si]%13(C%14=C(C=CC=C%14)OC%15=C%13C=CC=C%15)C%16=C%11C=CC=C%16)=C%10)C=C9)C%17=C4C=CC=C%17	C1=CC=C2C(=C1)C3=CC=CC=C3N2C4=CC=CC(=C4)C5=CC(=CC=C5)N6C7=CC=CC=C7C8=CC=CC=C86	0.258
CC(C)[Si]1(C(C)C)C2=C(C=CC=C2)N(C2=CC3=C(C=C2)C2=NC4=C(C=CC5=C4C=CC(N4C6=C(C=CC=C6)[Si](C(C)C)(C(C)C)C6=C4C=CC=C6)=C5)N=C2C=C3)C2=C1C=CC=C2	C1=CC=C2C(=C1)C3=CC=CC=C3N2C4=CC=CC(=C4)C5=CC(=CC=C5)N6C7=CC=CC=C7C8=CC=CC=C86	0.185
C12=C([Si]3(C4=C(N(C5=C3C=CC=C5)C6=CC7=C(C8=NC9=C(N=C8C=C7)C=CC%10=C9C=CC(N%11C%12=C([Si]%13(C%14=C%11C=CC=C%14)C%15=C(OC%16=C%13C=CC=C%16)C=CC=C%15)C=CC=C%12)=C%10)C=C6)C=CC=C4)C%17=C(O2)C=CC=C%17)C=CC=C1	C1=CC=C2C(=C1)C3=CC=CC=C3N2C4=CC=CC(=C4)C5=CC(=CC=C5)N6C7=CC=CC=C7C8=CC=CC=C86	0.153
C1(C2=NC(C3=CC=CC=C3)=NC(C4=CC=CC=C4)=N2)=CC(C5=CC=CC=C5)=C(N6C7=CC=C(N8C9=C(C%10=C8C=CC=C%10)C=CC=C9)C=C7C%11=C6C=CC=C%11)C=C1	C1=CC=C2C(=C1)C3=CC=CC=C3N2C4=CC=CC(=C4)C5=CC(=CC=C5)N6C7=CC=CC=C7C8=CC=CC=C86	0.637
C1(C2=NC(C3=CC=CC=C3)=NC(C4=CC=CC=C4)=N2)=CC(C5=CC=CC=C5)=C(N6C7=CC=C(N8C9=C(C%10=C8C=CC=C%10)C=CC=C9)C=C7C%11=C6C=CC=C%11)C=C1	C1=CC=C2C(=C1)C3=CC=CC=C3N2C4=CC=CC(=C4)C5=CC(=CC(=C5)C#N)N6C7=CC=CC=C7C8=CC=CC=C86	0.629
C1=CC=C([Si]2(C3=CC=CC=C3)C3=C(C=CC=C3)N(C3=CC4=C(C=C3)C=CC3=NC5=C(N=C34)C3=C(C=CC(N4C6=C(C=CC=C6)[Si](C6=CC=CC=C6)(C6=CC=CC=C6)C6=C4C=CC=C6)=C3)C=C5)C3=C2C=CC=C3)C=C1	C1=CC=C2C(=C1)C3=CC=CC=C3N2C4=CC=C(C=C4)N(C5=CC=C(C=C5)N6C7=CC=CC=C7C8=CC=CC=C86)C9=CC=C(C=C9)N1C2=CC=CC=C2C2=CC=CC=C21	0.518
CC([Si]1(C(C)C)C2=C(N(C3=C1C=CC=C3)C4=CC5=C(C=CC6=C5N=C7C(C=CC8=C7C=C(C=C8)N9C%10=C([Si](C(C)C)(C%11=C9C=CC=C%11)C(C)C)C=CC=C%10)=N6)C=C4)C=CC=C2)C	C1=CC=C2C(=C1)C3=CC=CC=C3N2C4=CC=C(C=C4)N(C5=CC=C(C=C5)N6C7=CC=CC=C7C8=CC=CC=C86)C9=CC=C(C=C9)N1C2=CC=CC=C2C2=CC=CC=C21	0.222
C12=CC=CC=C1OC3=CC=CC=C3[Si]24C5=CC=CC=C5N(C6=CC7=C(C=C6)C=CC8=NC9=C(N=C87)C%10=C(C=CC(N%11C%12=CC=CC=C%12[Si]%13(C%14=C(C=CC=C%14)OC%15=C%13C=CC=C%15)C%16=C%11C=CC=C%16)=C%10)C=C9)C%17=C4C=CC=C%17	C1=CC=C2C(=C1)C3=CC=CC=C3N2C4=CC=C(C=C4)N(C5=CC=C(C=C5)N6C7=CC=CC=C7C8=CC=CC=C86)C9=CC=C(C=C9)N1C2=CC=CC=C2C2=CC=CC=C21	0.171
CC(C)[Si]1(C(C)C)C2=C(C=CC=C2)N(C2=CC3=C(C=C2)C2=NC4=C(C=CC5=C4C=CC(N4C6=C(C=CC=C6)[Si](C(C)C)(C(C)C)C6=C4C=CC=C6)=C5)N=C2C=C3)C2=C1C=CC=C2	C1=CC=C2C(=C1)C3=CC=CC=C3N2C4=CC=C(C=C4)N(C5=CC=C(C=C5)N6C7=CC=CC=C7C8=CC=CC=C86)C9=CC=C(C=C9)N1C2=CC=CC=C2C2=CC=CC=C21	0.122
C12=C([Si]3(C4=C(N(C5=C3C=CC=C5)C6=CC7=C(C8=NC9=C(N=C8C=C7)C=CC%10=C9C=CC(N%11C%12=C([Si]%13(C%14=C%11C=CC=C%14)C%15=C(OC%16=C%13C=CC=C%16)C=CC=C%15)C=CC=C%12)=C%10)C=C6)C=CC=C4)C%17=C(O2)C=CC=C%17)C=CC=C1	C1=CC=C2C(=C1)C3=CC=CC=C3N2C4=CC=C(C=C4)N(C5=CC=C(C=C5)N6C7=CC=CC=C7C8=CC=CC=C86)C9=CC=C(C=C9)N1C2=CC=CC=C2C2=CC=CC=C21	0.094
CC(C)(C)C1=CC2=C(C=C1)N(C3=C2C=C(C(C)(C)C)C=C3)C4=CC(C(F)(F)F)=C(C5=NC(C6=CC=CC=C6)=NC(C7=CC=CC=C7)=N5)C=C4	C1=CC=C2C(=C1)C3=CC=CC=C3N2C4=CC(=CC=C4)N5C6=CC=CC=C6C7=CC=CC=C75	0.99
CC1(C)C2=C(C=CC=C2)N(C2=CC=C3B4C5=C(C=CC(C6(C7=CC8=C(C=C7)OC7=CC=CC9=C7B8C7=C(C=C(N8C%10=C(C=CC=C%10)C(C)(C)C%10=C8C=CC=C%10)C=C7)O9)C7=C(C=CC=C7)C7=C6C=CC=C7)=C5)OC5=C4C(=CC=C5)OC3=C2)C2=C1C=CC=C2	C1=CC=C2C(=C1)C3=CC=CC=C3N2C4=CC(=CC=C4)N5C6=CC=CC=C6C7=CC=CC=C75	0.97
CC1C2=CC=CC3=C2B2C4=C(C=CC=C4C(C)C4=C2C1=CC(N1C2=CC=CC=C2C2(C5=C(C=CC=C5)C5=C2C=CC=C5)C2=C1C=CC=C2)=C4)C3	C1=CC=C2C(=C1)C3=CC=CC=C3N2C4=CC(=CC=C4)N5C6=CC=CC=C6C7=CC=CC=C75	0.84
C1=CC2=C(C=C1)B1C3=C(C=CC=C3)OC3=C(C4=CC=C(N5C6=C(C=CC=C6)SC6=C5C=CC=C6)C=C4)C=CC(=C13)O2	C1=CC=C2C(=C1)C3=CC=CC=C3N2C4=CC(=CC=C4)N5C6=CC=CC=C6C7=CC=CC=C75	0.75
CC(C)(C)C1=CC=C(N(C2=CC=C(C(C)(C)C)C=C2)C2=CC3=C4B(C5=CC(C(C)(C)C)=CC=C5N3C3=CC=C(C(C)(C)C)C=C3)C3=C(C=CC(C(C)(C)C)=C3)N(C3=CC=C(C(C)(C)C)C=C3)C4=C2)C=C1	C1=CC=C2C(=C1)C3=CC=CC=C3N2C4=CC(=CC=C4)N5C6=CC=CC=C6C7=CC=CC=C75	0.747
CC1=C(C2=NC(C3=CC=CC=C3)=NC(C4=CC=CC=C4)=N2)C=CC(N5C6=C(C7=C5C=CC=C7)C=CC=C6)=C1	C1=CC=C2C(=C1)C3=CC=CC=C3N2C4=CC(=CC=C4)N5C6=CC=CC=C6C7=CC=CC=C75	0.73
O=C(C1=CC=C(N2C3=C(C=CC=C3)OC3=C2C=CC=C3)C=C1)C1=CC=C(N2C3=C(C=CC=C3)OC3=C2C=CC=C3)C=C1	C1=CC=C2C(=C1)C3=CC=CC=C3N2C4=CC(=CC=C4)N5C6=CC=CC=C6C7=CC=CC=C75	0.7
CC(C)(C)C1=CC=C(N2C3=CC(N(C4=CC=CC=C4)C4=CC=CC=C4)=CC4=C3B(C3=CC(C(C)(C)C)=CC=C3N4C3=CC=C(C(C)(C)C)C=C3)C3=C2C=CC(C(C)(C)C)=C3)C=C1	C1=CC=C2C(=C1)C3=CC=CC=C3N2C4=CC(=CC=C4)N5C6=CC=CC=C6C7=CC=CC=C75	0.673
CC(C)(C)C1=CC2=C(C=C1)OC1=C3B2C2=CC=C(N4C5=C(C=CC=C5)C(C)(C)C5=C4C=CC=C5)C=C2OC3=CC=C1	C1=CC=C2C(=C1)C3=CC=CC=C3N2C4=CC(=CC=C4)N5C6=CC=CC=C6C7=CC=CC=C75	0.66
CC(C)(C)C1=CC2=C(C=C1)N(C1=CC=CC=C1C1=NC(C3=CC=CC=C3)=NC(C3=CC=CC=C3)=N1)C1=C2C=C(C(C)(C)C)C=C1	C1=CC=C2C(=C1)C3=CC=CC=C3N2C4=CC(=CC=C4)N5C6=CC=CC=C6C7=CC=CC=C75	0.64
C1=CC=C(N(C2=CC=CC=C2)C2=CC3=C4B(C5=CC=CC=C5N3C3=CC=CC=C3)C3=C(C=CC=C3)N(C3=CC=CC=C3)C4=C2)C=C1	C1=CC=C2C(=C1)C3=CC=CC=C3N2C4=CC(=CC=C4)N5C6=CC=CC=C6C7=CC=CC=C75	0.608
O=C(N(C1=O)CC(CCCC)CC)C2=CC=C(N3C4=CC=CC=C4OC5=C3C=CC=C5)C6=CC=CC1=C26	C1=CC=C2C(=C1)C3=CC=CC=C3N2C4=CC(=CC=C4)N5C6=CC=CC=C6C7=CC=CC=C75	0.53
FC(C1=C(C2=NC(C3=CC=CC=C3)=NC(C4=CC=CC=C4)=N2)C=CC(N5C6=C(C7=C5C=CC=C7)C=CC=C6)=C1)(F)F	C1=CC=C2C(=C1)C3=CC=CC=C3N2C4=CC(=CC=C4)N5C6=CC=CC=C6C7=CC=CC=C75	0.481
COC1=CC(C2=NC(C3=CC=CC(OC)=C3)=NC(C3=CC=CC=C3N3C4=C(C=C(C(C)(C)C)C=C4)C4=C3C=CC(C(C)(C)C)=C4)=N2)=CC=C1	C1=CC=C2C(=C1)C3=CC=CC=C3N2C4=CC(=CC=C4)N5C6=CC=CC=C6C7=CC=CC=C75	0.44
O=C(C1=CC=CC=C1O2)C(C=C3N4C5=C(C6=C4C=CC(C(C)(C)C)=C6)C=C(C(C)(C)C)C=C5)=C2C=C3N(C7=C8C=C(OC)C=C7)C9=C8C=CC=C9	C1=CC=C2C(=C1)C3=CC=CC=C3N2C4=CC(=CC=C4)N5C6=CC=CC=C6C7=CC=CC=C75	0.41
CC(C1=CC2=C(N(C3=C2C=C(C=C3)C(C)(C)C)C4=C(C(N5C6=C(C7=C5C=CC(C(C)(C)C)=C7)C=C(C=C6)C(C)(C)C)=CC=C4)C8=NC(C9=CC=CC=C9)=NC(C%10=CC=CC=C%10)=N8)C=C1)(C)C	C1=CC=C2C(=C1)C3=CC=CC=C3N2C4=CC(=CC=C4)N5C6=CC=CC=C6C7=CC=CC=C75	0.32
CC1=CC(C2=NC(C3=CC=CC=C3)=NC(C4=CC=CC=C4)=N2)=CC(C)=C1N5C6=C(C7=C5C=CC=C7)C=CC=C6	C1=CC=C2C(=C1)C3=CC=CC=C3N2C4=CC(=CC=C4)N5C6=CC=CC=C6C7=CC=CC=C75	0.318
COC1=CC2=C(C=C1)N(C1=CC3=C(C=C1N1C4=C(C=CC=C4)C4=C1C=CC=C4)C(=O)C1=CC=CC=C1O3)C1=C2C=CC=C1	C1=CC=C2C(=C1)C3=CC=CC=C3N2C4=CC(=CC=C4)N5C6=CC=CC=C6C7=CC=CC=C75	0.29
O=C(C1=CC=C(C2=CC=CC3=C12)N4C5=CC=C(C(C)(C)C)C=C5SC6=C4C=CC(C(C)(C)C)=C6)N(CC(CC)CCCC)C3=O	C1=CC=C2C(=C1)C3=CC=CC=C3N2C4=CC(=CC=C4)N5C6=CC=CC=C6C7=CC=CC=C75	0.18
C1(C2=NC(C3=CC=CC=C3)=NC(C4=CC=CC=C4)=N2)=CC(C5=CC=CC=C5)=C(N6C7=CC=C(N8C9=C(C%10=C8C=CC=C%10)C=CC=C9)C=C7C%11=C6C=CC=C%11)C=C1	C1=CC=C2C(=C1)C3=CC=CC=C3N2C4=C(C=CC=C4C5=CC6=C(C=C5)OC7=CC=CC=C76)C#N	0.801
C1=CC=C(C2=NC(C3=CC=CC=C3)=NC(N3C4=C(C=CC=C4)C4=C3C3=C(C=C4)N(C4=CC=CC=C4)C4=C3C=CC=C4)=N2)C=C1	C1=CC=C(C2=NC(C3=CC=CC=C3)=NC(N3C4=C(C=CC=C4)C4=C3C3=C(C=C4)N(C4=CC=CC=C4)C4=C3C=CC=C4)=N2)C=C1	0.23
C1=CC=C(C2=CC(C3=CC=C(N4C5=C(C=CC=C5)C5=C4C=CC4=C5SC5=C4C=CC=C5)C=C3)=NC(C3=CC=CC=C3)=N2)C=C1	C1=CC=C(C2=CC(C3=CC=C(N4C5=C(C=CC=C5)C5=C4C=CC4=C5SC5=C4C=CC=C5)C=C3)=NC(C3=CC=CC=C3)=N2)C=C1	0.42
C1=CC=C(C2=CC(C3=CC=C(N4C5=C(C=CC=C5)C5=C4C=CC4=C5OC5=C4C=CC=C5)C=C3)=NC(C3=CC=CC=C3)=N2)C=C1	C1=CC=C(C2=CC(C3=CC=C(N4C5=C(C=CC=C5)C5=C4C=CC4=C5OC5=C4C=CC=C5)C=C3)=NC(C3=CC=CC=C3)=N2)C=C1	0.38
C1=CC2=C(C=C1)N(C1=CC(C3=CC(N4C5=C(C=CC=C5)C5=C4C=CC=C5)=NC(N4C5=C(C=CC=C5)C5=C4C=CC=C5)=C3)=CC(N3C4=C(C=CC=C4)C4=C3C=CC=C4)=N1)C1=C2C=CC=C1	C1=CC=C(C=C1)P(=O)(C2=CC=CC=C2)C3=CC4=C(C=C3)SC5=C4C=C(C=C5)P(=O)(C6=CC=CC=C6)C7=CC=CC=C7	0.77
CC(C)(C)C1=CC2=C(C=C1)N(C1=CC=C(S(=O)(=O)C3=CC=C(N4C5=C(C=C(C(C)(C)C)C=C5)C5=C4C=CC(C(C)(C)C)=C5)C=N3)N=C1)C1=C2C=C(C(C)(C)C)C=C1	C1=CC=C(C=C1)P(=O)(C2=CC=CC=C2)C3=CC4=C(C=C3)SC5=C4C=C(C=C5)P(=O)(C6=CC=CC=C6)C7=CC=CC=C7	0.67
CC(C)(C)C1=CC2=C(C=C1)N(C1=CC=C(S(=O)(=O)C3=CC=C(N4C5=C(C=C(C(C)(C)C)C=C5)C5=C4C=CC(C(C)(C)C)=C5)N=C3)C=N1)C1=C2C=C(C(C)(C)C)C=C1	C1=CC=C(C=C1)P(=O)(C2=CC=CC=C2)C3=CC4=C(C=C3)SC5=C4C=C(C=C5)P(=O)(C6=CC=CC=C6)C7=CC=CC=C7	0.62
C12=C(N(C3=C2C=CC=C3)C4=CC(C5=CC(N6C7=C(C8=C6C=CC=C8)C=CC=C7)=NC(N9C%10=C(C%11=C9C=CC=C%11)C=CC=C%10)=N5)=NC(N%12C%13=C(C%14=C%12C=CC=C%14)C=CC=C%13)=N4)C=CC=C1	C1=CC=C(C=C1)P(=O)(C2=CC=CC=C2)C3=CC4=C(C=C3)SC5=C4C=C(C=C5)P(=O)(C6=CC=CC=C6)C7=CC=CC=C7	0.29
CC(C)(C)C1=CC=C2OC3=CC(N4C5=C(C=CC=C5)C5=C4C4=C(C6=C5N(C5=CC=CC=C5)C5=C6C=CC=C5)N(C5=CC=CC=C5)C5=C4C=CC=C5)=CC4=C3B(C2=C1)C1=CC(C(C)(C)C)=CC=C1O4	C1=CC=C(C=C1)P(=O)(C2=CC=CC=C2)C3=CC4=C(C=C3)OC5=C4C=C(C=C5)P(=O)(C6=CC=CC=C6)C7=CC=CC=C7	0.99
CC1=CC=C2OC3=C4B(C2=C1)C1=C(C=CC(C)=C1)OC4=CC(N1C2=C(C=CC=C2)C2=C1C1=C(C4=C2N(C2=CC=CC=C2)C2=C4C=CC=C2)N(C2=CC=CC=C2)C2=C1C=CC=C2)=C3	C1=CC=C(C=C1)P(=O)(C2=CC=CC=C2)C3=CC4=C(C=C3)OC5=C4C=C(C=C5)P(=O)(C6=CC=CC=C6)C7=CC=CC=C7	0.978
CC1=CC=C2B3C4=C(C=C(C)C=C4)OC4=CC(N5C6=C(C=CC=C6)C6=C5C5=C(C7=C6N(C6=CC=CC=C6)C6=C7C=CC=C6)N(C6=CC=CC=C6)C6=C5C=CC=C6)=CC(=C34)OC2=C1	C1=CC=C(C=C1)P(=O)(C2=CC=CC=C2)C3=CC4=C(C=C3)OC5=C4C=C(C=C5)P(=O)(C6=CC=CC=C6)C7=CC=CC=C7	0.973
CC(C)C1=CC(C(C)C)=C(B2C3=CC=CC=C3OC3=C2C=CC(N2C4=CC=CC=C4C4=C2C2=C(C5=C4N(C4=CC=CC=C4)C4=C5C=CC=C4)N(C4=CC=CC=C4)C4=C2C=CC=C4)=C3)C(C(C)C)=C1	C1=CC=C(C=C1)P(=O)(C2=CC=CC=C2)C3=CC4=C(C=C3)OC5=C4C=C(C=C5)P(=O)(C6=CC=CC=C6)C7=CC=CC=C7	0.971
C1=C=CC2=C(C=1)C1=C(C3=C(SC4=C3C=CC=C4)C3=C1N(C1=CC4=C5B(C6=C(C=CC=C6)OC5=C1)C1=C(C=CC=C1)O4)C1=C3C=CC=C1)N2C1=CC=CC=C1	C1=CC=C(C=C1)P(=O)(C2=CC=CC=C2)C3=CC4=C(C=C3)OC5=C4C=C(C=C5)P(=O)(C6=CC=CC=C6)C7=CC=CC=C7	0.948
CC1=CC=C2C(=C1)C1=C(C=CC(C3=CC4=C(C=C3)N(C3=CC5=C6B(C7=C(C=CC=C7)OC6=C3)C3=C(C=CC=C3)O5)C3=CC=C(C5=CC=C6C(=C5)C5=C(C=CC(C)=C5)N6C5=CC=CC=C5)C=C34)=C1)N2C1=CC=CC=C1	C1=CC=C(C=C1)P(=O)(C2=CC=CC=C2)C3=CC4=C(C=C3)OC5=C4C=C(C=C5)P(=O)(C6=CC=CC=C6)C7=CC=CC=C7	0.928
CC1=CC=C2C(=C1)C1=C(C=CC(C3=CC4=C(C=C3)N(C3=CC5=C6B(C7=C(C=CC=C7)O5)C5=C(CCC=C5)OC6=C3)C3=CC=C(C5=CC=C6C(=C5)C5=C(C=CC(C)=C5)N6C5=CC=CC=C5)C=C34)=C1)N2C1=CC=CC=C1	C1=CC=C(C=C1)P(=O)(C2=CC=CC=C2)C3=CC4=C(C=C3)OC5=C4C=C(C=C5)P(=O)(C6=CC=CC=C6)C7=CC=CC=C7	0.928
N#CC1=C(C2=CC=C(N3C4=C(C=CC=C4)C4=C3C=CC=C4)C=C2)C=CC=C1OC1=CC(C2=CC=C(N3C4=C(C=CC=C4)C4=C3C=CC=C4)C=C2)=CC=C1	C1=CC=C(C=C1)P(=O)(C2=CC=CC=C2)C3=CC4=C(C=C3)OC5=C4C=C(C=C5)P(=O)(C6=CC=CC=C6)C7=CC=CC=C7	0.9
CC1=CC=C(S(=O)(=O)C2=CC(N3C4=C(C=C(C5=CC=CC=C5)C=C4)C4=C3C=CC(C3=CC=CC=C3)=C4)=NC(N3C4=C(C=C(C5=CC=CC=C5)C=C4)C4=C3C=CC(C3=CC=CC=C3)=C4)=C2)C=C1	C1=CC=C(C=C1)P(=O)(C2=CC=CC=C2)C3=CC4=C(C=C3)OC5=C4C=C(C=C5)P(=O)(C6=CC=CC=C6)C7=CC=CC=C7	0.89
CC(C)(C)C1=CC=C(OC2=C3)C(B(C4=C(O5)C=CC(C(C)(C)C)=C4)C2=C5C=C3N6C7=CC=CC=C7C8(C9=C(N(C%10=CC=CC=C%108)C%11=CC=C(C(C)(C)C)C=C%11)C=CC=C9)C%12=C6C=CC=C%12)=C1	C1=CC=C(C=C1)P(=O)(C2=CC=CC=C2)C3=CC4=C(C=C3)OC5=C4C=C(C=C5)P(=O)(C6=CC=CC=C6)C7=CC=CC=C7	0.89
CC(C)(C)C1=CC=C2OC3=CC(N4C5=C(C=C(C6=CC=C7C(=C6)C6=C(C=CC=C6)N7C6=CC=CC=C6)C=C5)C5=C4C=CC(C4=CC6=C(C=C4)N(C4=CC=CC=C4)C4=CC=CC=C46)=C5)=CC4=C3B(C2=C1)C1=C(C=CC(C(C)(C)C)=C1)O4	C1=CC=C(C=C1)P(=O)(C2=CC=CC=C2)C3=CC4=C(C=C3)OC5=C4C=C(C=C5)P(=O)(C6=CC=CC=C6)C7=CC=CC=C7	0.878
CC(C)(C1=CC=C2OC3=CC(N(C4=C5C=CC=C4)C6=CC=CC=C6C75C8=CC=CC=C8N(C9=C7C=CC=C9)C%10=CC%11=C%12B(C%13=C(O%11)C=CC(C(C)(C)C)=C%13)C%14=CC(C(C)(C)C)=CC=C%14OC%12=C%10)=CC%15=C3B(C%16=C(O%15)C=CC(C(C)(C)C)=C%16)C2=C1)C	C1=CC=C(C=C1)P(=O)(C2=CC=CC=C2)C3=CC4=C(C=C3)OC5=C4C=C(C=C5)P(=O)(C6=CC=CC=C6)C7=CC=CC=C7	0.87
N#CC1=C(C2=CC=C(N3C4=C(C=CC=C4)C4=C3C=CC=C4)C=C2)C=CC=C1OC1=CC=CC=C1	C1=CC=C(C=C1)P(=O)(C2=CC=CC=C2)C3=CC4=C(C=C3)OC5=C4C=C(C=C5)P(=O)(C6=CC=CC=C6)C7=CC=CC=C7	0.83
CC1=CC=C(S(=O)(=O)C2=CC(N3C4=C(C=C(C(C)(C)C)C=C4)C4=C3C=CC(C(C)(C)C)=C4)=NC(N3C4=C(C=C(C(C)(C)C)C=C4)C4=C3C=CC(C(C)(C)C)=C4)=C2)C=C1	C1=CC=C(C=C1)P(=O)(C2=CC=CC=C2)C3=CC4=C(C=C3)OC5=C4C=C(C=C5)P(=O)(C6=CC=CC=C6)C7=CC=CC=C7	0.692
CC1=CC2=C(C=C1)N(C1=CC3=C(C=C1)P(=S)(C1=CC=CC=C1)C1=C(C=CC=C1)S3)C1=C(C=C(C)C=C1)C21C2=C(C=CC=C2)C2=C1C=CC=C2	C1=CC=C(C=C1)P(=O)(C2=CC=CC=C2)C3=CC4=C(C=C3)OC5=C4C=C(C=C5)P(=O)(C6=CC=CC=C6)C7=CC=CC=C7	0.66
CC(C)C1=CC(C(C)C)=C(B2C3=CC=CC=C3OC3=C2C=CC(N2C4=CC=CC=C4C4=C2C2=C(C=C4)N(C4=CC=CC=C4)C4=C2C=CC=C4)=C3)C(C(C)C)=C1	C1=CC=C(C=C1)P(=O)(C2=CC=CC=C2)C3=CC4=C(C=C3)OC5=C4C=C(C=C5)P(=O)(C6=CC=CC=C6)C7=CC=CC=C7	0.631
CC1=CC2=C(C=C1)N(C1=CC3=C(C=C1)P(=S)(C1=CC=CC=C1)C1=C(C=CC=C1)O3)C1=C(C=C(C)C=C1)C21C2=C(C=CC=C2)C2=C1C=CC=C2	C1=CC=C(C=C1)P(=O)(C2=CC=CC=C2)C3=CC4=C(C=C3)OC5=C4C=C(C=C5)P(=O)(C6=CC=CC=C6)C7=CC=CC=C7	0.58
CC1=CC2=C(C=C1)N(C1=CC3=C(C=C1)P(=O)(C1=CC=CC=C1)C1=C(C=CC=C1)O3)C1=C(C=C(C)C=C1)C21C2=C(C=CC=C2)C2=C1C=CC=C2	C1=CC=C(C=C1)P(=O)(C2=CC=CC=C2)C3=CC4=C(C=C3)OC5=C4C=C(C=C5)P(=O)(C6=CC=CC=C6)C7=CC=CC=C7	0.57
CC1=CC2=C(C=C1)N(C1=CC3=C(C=C1)P(=O)(C1=CC=CC=C1)C1=C(C=CC=C1)O3)C1=C(C=C(C)C=C1)C21C2=C(C=CC=C2)C2=C1C=CC=C2	C1=CC=C(C=C1)P(=O)(C2=CC=CC=C2)C3=CC4=C(C=C3)OC5=C4C=C(C=C5)P(=O)(C6=CC=CC=C6)C7=CC=CC=C7	0.44
CC1=CC=C(S(=O)(=O)C2=CC(N3C4=C(C=CC=C4)C4=C3C=CC=C4)=CC(N3C4=C(C=CC=C4)C4=C3C=CC=C4)=C2)C=C1	C1=CC=C(C=C1)P(=O)(C2=CC=CC=C2)C3=CC4=C(C=C3)OC5=C4C=C(C=C5)P(=O)(C6=CC=CC=C6)C7=CC=CC=C7	0.159
O=P(C1=CC=C(N2C3=C(C=CC=C3)C(C4=C2C=CC=C4)(C5=CC=CC=C5)C6=CC=CC=C6)C=C1)(C7=CC=C(C=C7)N8C9=C(C=CC=C9)C(C%10=C8C=CC=C%10)(C%11=CC=CC=C%11)C%12=CC=CC=C%12)C%13=CC=C(N%14C%15=C(C=CC=C%15)C(C%16=C%14C=CC=C%16)(C%17=CC=CC=C%17)C%18=CC=CC=C%18)C=C%13	C1=CC=C(C=C1)P(=O)(C2=CC=CC=C2)C3=CC=CC4=C3OC5=C4C=CC=C5P(=O)(C6=CC=CC=C6)C7=CC=CC=C7	0.33
O=P(C1=CC=CC=C1)(C2=CC=C(C=C2)N3C4=C(C(C5=CC=CC=C5)(C6=C3C=CC=C6)C7=CC=CC=C7)C=CC=C4)C8=CC=C(N9C%10=C(C(C%11=CC=CC=C%11)(C%12=C9C=CC=C%12)C%13=CC=CC=C%13)C=CC=C%10)C=C8	C1=CC=C(C=C1)P(=O)(C2=CC=CC=C2)C3=CC=CC4=C3OC5=C4C=CC=C5P(=O)(C6=CC=CC=C6)C7=CC=CC=C7	0.21
O=P(C1=CC=CC=C1)(C1=CC=CC=C1)C1=CC=C(N2C3=C(C=CC=C3)C(C3=CC=CC=C3)(C3=CC=CC=C3)C3=C2C=CC=C3)C=C1	C1=CC=C(C=C1)P(=O)(C2=CC=CC=C2)C3=CC=CC4=C3OC5=C4C=CC=C5P(=O)(C6=CC=CC=C6)C7=CC=CC=C7	0.17
CC1(C)C2=CC=CC3=C2B2C4=C(C=CC=C4C(C)(C)C4=C2C1=CC(N1C2=C(C=CC=C2)C(C)(C)C2=C1C=CC=C2)=C4)C3	C1=CC=C(C=C1)P(=O)(C2=CC=CC=C2)C3=CC=CC=C3OC4=CC=CC=C4P(=O)(C5=CC=CC=C5)C6=CC=CC=C6	1
CC1(C)C2=CC(N3C4=C(C=CC=C4)C(C)(C)C4=C3C=CC=C4)=CC3=C2B2C4=C(C=CC=C41)C(C)(C)C1=C2C(=CC=C1)C3(C)C	C1=CC=C(C=C1)P(=O)(C2=CC=CC=C2)C3=CC=CC=C3OC4=CC=CC=C4P(=O)(C5=CC=CC=C5)C6=CC=CC=C6	1
CC1(C)C2=CC=CC3=C2B2C4=C(C=CC=C4C(C)(C)C4=C2C1=CC(N1C2=C(C=CC=C2)C(C)(C)C2=C1C=CC=C2)=C4)O3	C1=CC=C(C=C1)P(=O)(C2=CC=CC=C2)C3=CC=CC=C3OC4=CC=CC=C4P(=O)(C5=CC=CC=C5)C6=CC=CC=C6	1
CC1=CC2=C(C(C)=C1)N(C1=CC=C(C3=NC(C4=CC=CC=C4)=NC(C4=CC=CC=C4)=N3)C=C1)C1=C2C=C(C)C=C1C	C1=CC=C(C=C1)P(=O)(C2=CC=CC=C2)C3=CC=CC=C3OC4=CC=CC=C4P(=O)(C5=CC=CC=C5)C6=CC=CC=C6	0.98
CC1(C)C2=C(C=CC=C2)N(C2=CC3=C(C=C2)N2C4=C(C=CC=C4)C4=CC(N5C6=C(C=CC=C6)C(C)(C)C6=C5C=CC=C6)=CC3=C42)C2=C1C=CC=C2	C1=CC=C(C=C1)P(=O)(C2=CC=CC=C2)C3=CC=CC=C3OC4=CC=CC=C4P(=O)(C5=CC=CC=C5)C6=CC=CC=C6	0.96
CC1=CC(N2C3=C(C=CC=C3)C(C)(C)C3=C2C=CC=C3)=CC(C)=C1B1C2=C(C=CC=C2)OC2=C1C=CC=C2	C1=CC=C(C=C1)P(=O)(C2=CC=CC=C2)C3=CC=CC=C3OC4=CC=CC=C4P(=O)(C5=CC=CC=C5)C6=CC=CC=C6	0.95
CC1(C)C2=C(C=CC=C2)N(C2=CC3=C4C(=C2)C2=C(C=CC=C2)N4C2=C3C=CC=C2)C2=C1C=CC=C2	C1=CC=C(C=C1)P(=O)(C2=CC=CC=C2)C3=CC=CC=C3OC4=CC=CC=C4P(=O)(C5=CC=CC=C5)C6=CC=CC=C6	0.95
CC(C)(C)C1=CC2=C3B(C4=C(C=CC=C4)O2)C2=C4C(=CC=C2)C2=CC=CC=C2N4C3=C1	C1=CC=C(C=C1)P(=O)(C2=CC=CC=C2)C3=CC=CC=C3OC4=CC=CC=C4P(=O)(C5=CC=CC=C5)C6=CC=CC=C6	0.94
CC(C)(C)C1=CC2=C3B(C4=C(C=CC=C4)O2)C2=C4C(=CC=C2)C(C2=CC=CC=C2)(C2C=CC=CC2)C2=CC=CC=C2N4C3=C1	C1=CC=C(C=C1)P(=O)(C2=CC=CC=C2)C3=CC=CC=C3OC4=CC=CC=C4P(=O)(C5=CC=CC=C5)C6=CC=CC=C6	0.94
CC1(C)C2=CC=CC=C2C2=CC3=C(C=C21)N(C1=CC=C(C2=NC(C4=CC=CC=C4)=NC(C4=CC=CC=C4)=N2)C=C1)C1=CC=CC=C13	C1=CC=C(C=C1)P(=O)(C2=CC=CC=C2)C3=CC=CC=C3OC4=CC=CC=C4P(=O)(C5=CC=CC=C5)C6=CC=CC=C6	0.933
CC1=CC2=C(C=C1)N(C1=CC=C(C3=NC(C4=CC=CC=C4)=NC(C4=CC=CC=C4)=N3)C=C1C)C1=C2C=C(C)C=C1	C1=CC=C(C=C1)P(=O)(C2=CC=CC=C2)C3=CC=CC=C3OC4=CC=CC=C4P(=O)(C5=CC=CC=C5)C6=CC=CC=C6	0.92
C1=CC=C(C2=NC(C3=CC=CC=C3)=NC(C3=CC=C(N4C5=CC=CC=C5C5=CC6=C(C=C54)C(C4=CC=CC=C4)(C4=CC=CC=C4)C4=CC=CC=C46)C=C3)=N2)C=C1	C1=CC=C(C=C1)P(=O)(C2=CC=CC=C2)C3=CC=CC=C3OC4=CC=CC=C4P(=O)(C5=CC=CC=C5)C6=CC=CC=C6	0.911
CC(C)(C)C1=CC2=C3B(C4=C(C=CC=C4)O2)C2=C4C(=CC=C2)C(C)(C)C2=CC=CC=C2N4C3=C1	C1=CC=C(C=C1)P(=O)(C2=CC=CC=C2)C3=CC=CC=C3OC4=CC=CC=C4P(=O)(C5=CC=CC=C5)C6=CC=CC=C6	0.91
CC(C)(C)C1=CC(B2C3=CC(C(C)(C)C)=CC=C3OC4=C2C5=CC(N6C(C=CC=C7)=C7C8(C9=C(C%10(C%11=C8C=CC=C%11)C%12=C(C%13=C%10C=CC=C%13)C=CC=C%12)C=CC=C9)C%14=CC=CC=C6%14)=C4)=C(O5)C=C1	C1=CC=C(C=C1)P(=O)(C2=CC=CC=C2)C3=CC=CC=C3OC4=CC=CC=C4P(=O)(C5=CC=CC=C5)C6=CC=CC=C6	0.9
CC(C)(C)C1=CC2=C(C=C1)OC1=CC(N3C4=C(C=CC=C4)C4(C5=C(C=CC=C5)C5=C4C=CC=C5)C4=C3C=CC=C4)=CC3=C1B2C1=C(C=CC(C(C)(C)C)=C1)O3	C1=CC=C(C=C1)P(=O)(C2=CC=CC=C2)C3=CC=CC=C3OC4=CC=CC=C4P(=O)(C5=CC=CC=C5)C6=CC=CC=C6	0.9
CC1=CC(C)=C(B(C2=CC3=C(C=C2)N2C4=C(C=CC=C4)C(C)(C)C4=C2C(=CC=C4)C3(C2=CC=CC=C2)C2=CC=CC=C2)C2=C(C)C=C(C)C=C2C)C(C)=C1	C1=CC=C(C=C1)P(=O)(C2=CC=CC=C2)C3=CC=CC=C3OC4=CC=CC=C4P(=O)(C5=CC=CC=C5)C6=CC=CC=C6	0.9
C1=CC2=C(C=C1)B1C3=C(C=CC=C3)OC3=C1C(=CC(N1C4=C(C=CC=C4)C4(C5=C1C=CC=C5)C1=C(C=CC=C1)N(C1=CC5=C6B(C7=C(C=CC=C7)OC6=C1)C1=C(C=CC=C1)O5)C1=C4C=CC=C1)=C3)O2	C1=CC=C(C=C1)P(=O)(C2=CC=CC=C2)C3=CC=CC=C3OC4=CC=CC=C4P(=O)(C5=CC=CC=C5)C6=CC=CC=C6	0.87
C1(C2=NC(C3=CC=CC=C3)=NC(C4=CC(C5=CC=CC=C5)=C(C=C4)N6C7=C(C8=C6C=CC(N9C%10=C(C%11=C9C=CC=C%11)C=CC=C%10)=C8)C=CC=C7)=N2)=CC=CC=C1	C1=CC=C(C=C1)P(=O)(C2=CC=CC=C2)C3=CC=CC=C3OC4=CC=CC=C4P(=O)(C5=CC=CC=C5)C6=CC=CC=C6	0.87
CC1=CC2=C(C=C1)N(C1=CC=C(C3=NC(C4=CC=CC=C4)=NC(C4=CC=CC=C4)=N3)C=C1)C1=C2C=C(C)C=C1	C1=CC=C(C=C1)P(=O)(C2=CC=CC=C2)C3=CC=CC=C3OC4=CC=CC=C4P(=O)(C5=CC=CC=C5)C6=CC=CC=C6	0.87
C[C@H](N1C2=C(S(=O)(C3=C1C=C(C=C3)N4C5=C(C(C)(C6=C4C=CC=C6)C)C=CC=C5)=O)C=CC(N7C8=C(C(C)(C9=C7C=CC=C9)C)C=CC=C8)=C2)C%10=CC=CC=C%10	C1=CC=C(C=C1)P(=O)(C2=CC=CC=C2)C3=CC=CC=C3OC4=CC=CC=C4P(=O)(C5=CC=CC=C5)C6=CC=CC=C6	0.86
CC(C)(C)C1=CC2=C3B(C4=C(C=CC=C4)O2)C2=C(C=CC=C2)N(C2=CC=CC=C2)C3=C1	C1=CC=C(C=C1)P(=O)(C2=CC=CC=C2)C3=CC=CC=C3OC4=CC=CC=C4P(=O)(C5=CC=CC=C5)C6=CC=CC=C6	0.86
C1(C2=NC(C3=CC=CC=C3)=NC(C4=CC=C(C=C4)N5C6=C(C7=C5C=CC(N8C9=C(C%10=C8C=CC=C%10)C=CC=C9)=C7)C=CC=C6)=N2)=CC=CC=C1	C1=CC=C(C=C1)P(=O)(C2=CC=CC=C2)C3=CC=CC=C3OC4=CC=CC=C4P(=O)(C5=CC=CC=C5)C6=CC=CC=C6	0.84
CC(C)(C)C1=CC2=C(C=C1)N(C1=CC=C(C3=NC(C4=CC=CC=C4)=NC(C4=CC=CC=C4)=N3)C=C1)C1=C2C=C(C(C)(C)C)C=C1C1=CC=C(N2C3=C(C=CC=C3)C3=C2C=CC=C3)C=C1	C1=CC=C(C=C1)P(=O)(C2=CC=CC=C2)C3=CC=CC=C3OC4=CC=CC=C4P(=O)(C5=CC=CC=C5)C6=CC=CC=C6	0.811
CC(C)(C1=CC2=C(N(C3=C2C=C(C=C3)C(C)(C)C)C4=CC=C(C=C4)C5=NC(C6=CC=CC=C6)=NC(C7=CC=CC=C7)=N5)C(C8=CC=CC=C8)=C1)C	C1=CC=C(C=C1)P(=O)(C2=CC=CC=C2)C3=CC=CC=C3OC4=CC=CC=C4P(=O)(C5=CC=CC=C5)C6=CC=CC=C6	0.804
CC1=NC(C2=CC=C(N3C4=C(C=CC=C4)C(C)(C)C4=C3C=CC=C4)C=C2)=CC(C2=CC=C(N3C4=C(C=CC=C4)C(C)(C)C4=C3C=CC=C4)C=C2)=N1	C1=CC=C(C=C1)P(=O)(C2=CC=CC=C2)C3=CC=CC=C3OC4=CC=CC=C4P(=O)(C5=CC=CC=C5)C6=CC=CC=C6	0.8
C1=CC2=C(C=C1)N1C(=N2)C2=CC=C(N3C4=C(C=CC=C4)OC4=C3C=CC=C4)C=C2C2=C1C=CC=C2	C1=CC=C(C=C1)P(=O)(C2=CC=CC=C2)C3=CC=CC=C3OC4=CC=CC=C4P(=O)(C5=CC=CC=C5)C6=CC=CC=C6	0.8
CC1(C)C2=C(C=CC=C2)N(C3=CC=C(C4=CC(C5=CC=C(N6C7=C(C=CC=C7)C(C8=C6C=CC=C8)(C)C)C=C5)=NC(C9=CC=CC=C9)=N4)C=C3)C%10=C1C=CC=C%10	C1=CC=C(C=C1)P(=O)(C2=CC=CC=C2)C3=CC=CC=C3OC4=CC=CC=C4P(=O)(C5=CC=CC=C5)C6=CC=CC=C6	0.79
C1(C2=NC(C3=CC=CC=C3)=NC(C4=CC=CC=C4)=N2)=CC(C5=CC=CC=C5)=C(N6C7=CC=C(N8C9=C(C%10=C8C=CC=C%10)C=CC=C9)C=C7C%11=C6C=CC=C%11)C=C1	C1=CC=C(C=C1)P(=O)(C2=CC=CC=C2)C3=CC=CC=C3OC4=CC=CC=C4P(=O)(C5=CC=CC=C5)C6=CC=CC=C6	0.79
CC(C)(C)C1=CC2=C(C=C1)N1C3=CC=C(C4=NC(C5=CC=CC=C5)=NC(C5=CC=CC=C5)=N4)C=C3C3=CC=CC(N4C5=C(C=CC=C5)C5=C4C=CCC5)=C3C3=CC(C(C)(C)C)=CC2=C31	C1=CC=C(C=C1)P(=O)(C2=CC=CC=C2)C3=CC=CC=C3OC4=CC=CC=C4P(=O)(C5=CC=CC=C5)C6=CC=CC=C6	0.781
N#CC1=CC=C(C=C1)N2N=C(C(C3=CCC(C=C3)N4C5=C(OC6=C4C=CC=C6)C=CC=C5)=N2)C7=CC=C(C=C7)N8C9=C(OC%10=C8C=CC=C%10)C=CC=C9	C1=CC=C(C=C1)P(=O)(C2=CC=CC=C2)C3=CC=CC=C3OC4=CC=CC=C4P(=O)(C5=CC=CC=C5)C6=CC=CC=C6	0.78
CC1(C)C2=C(C=CC=C2)N(C2=CC=C(C3=CC(C4=CC=C(N5C6=C(C=CC=C6)C(C)(C)C6=C5C=CC=C6)C=C4)=NC=N3)C=C2)C2=C1C=CC=C2	C1=CC=C(C=C1)P(=O)(C2=CC=CC=C2)C3=CC=CC=C3OC4=CC=CC=C4P(=O)(C5=CC=CC=C5)C6=CC=CC=C6	0.77
C1=CC=C(C2=CC(C3=CC=C(N4C5=C(C=CC=C5)C5=C4C=CC4=C5SC5=C4C=CC=C5)C=C3)=NC(C3=CC=CC=C3)=N2)C=C1	C1=CC=C(C=C1)P(=O)(C2=CC=CC=C2)C3=CC=CC=C3OC4=CC=CC=C4P(=O)(C5=CC=CC=C5)C6=CC=CC=C6	0.77
CC(C)(C)C1=CC2=C(C=C1)N(C1=CC=C(C3=NC(C4=CC=CC=C4)=NC(C4=CC=CC=C4)=N3)C=C1)C1=C2C=C(C(C)(C)C)C=C1	C1=CC=C(C=C1)P(=O)(C2=CC=CC=C2)C3=CC=CC=C3OC4=CC=CC=C4P(=O)(C5=CC=CC=C5)C6=CC=CC=C6	0.762
CC1=CC(N2C3=C(C=CC=C3)C(C)(C)C3=C2C=CC=C3)=CC(C)=C1B1C2=C(C=CC=C2)CC2=C1C=CC=C2	C1=CC=C(C=C1)P(=O)(C2=CC=CC=C2)C3=CC=CC=C3OC4=CC=CC=C4P(=O)(C5=CC=CC=C5)C6=CC=CC=C6	0.76
C1=CC=C(C2=CC(C3=CC=C(N4C5=C(C=CC=C5)C5=C4C=CC4=C5SC5=C4C=CC=C5)C=C3)=NC(C3=CC=CC=C3)=N2)C=C1	C1=CC=C(C=C1)P(=O)(C2=CC=CC=C2)C3=CC=CC=C3OC4=CC=CC=C4P(=O)(C5=CC=CC=C5)C6=CC=CC=C6	0.75
CC1(C)C2=C(C=CC=C2)N(C2=CC=C3C(=O)C4=C(C=C(N5C6=C(C=CC=C6)C(C)(C)C6=C5C=CC=C6)C=C4)N(C4=CC=C(C(F)(F)F)C=C4)C3=C2)C2=C1C=CC=C2	C1=CC=C(C=C1)P(=O)(C2=CC=CC=C2)C3=CC=CC=C3OC4=CC=CC=C4P(=O)(C5=CC=CC=C5)C6=CC=CC=C6	0.744
C1=CC=C(C2=CC(C3=CC=C(N4C5=CC=C6C7=C(C=CC=C7)C7(C8=C(C=CC=C8)C8=C7C=CC=C8)C6=C5C5=C4C=CC=C5)C=C3)=NC(C3=CC=CC=C3)=N2)C=C1	C1=CC=C(C=C1)P(=O)(C2=CC=CC=C2)C3=CC=CC=C3OC4=CC=CC=C4P(=O)(C5=CC=CC=C5)C6=CC=CC=C6	0.74
CC(C1=CC2=C(N(C3=C2C=C(C=C3)C(C)(C)C)C4=NC5=NC(N6C7=CC=C(C(C)(C)C)C=C7C8=C6C=CC(C(C)(C)C)=C8)=CC=C5C=C4)C(N9C%10=CC=C(C(C)(C)C)C=C%10C%11=C9C=CC(C(C)(C)C)=C%11)=C1)(C)C	C1=CC=C(C=C1)P(=O)(C2=CC=CC=C2)C3=CC=CC=C3OC4=CC=CC=C4P(=O)(C5=CC=CC=C5)C6=CC=CC=C6	0.74
O=C(C1=CC=C(C=C1)N2C3=C(C4=C2C=CC(N5C6=CC=CC=C6C7=C5C=CC=C7)=C4)C=CC=C3)C8=CC=C(C=C8)N9C%10=C(C%11=C9C=CC=C%11)C=C(N%12C%13=CC=CC=C%13C%14=C%12C=CC=C%14)C=C%10	C1=CC=C(C=C1)P(=O)(C2=CC=CC=C2)C3=CC=CC=C3OC4=CC=CC=C4P(=O)(C5=CC=CC=C5)C6=CC=CC=C6	0.73
C1=CC=C(C2=CC=C3C(=C2)C2=C(C=CC=C2)N3C2=CC=C(C3=NC(C4=CC=CC=C4)=NC(C4=CC=CC=C4)=C3)C=C2)C=C1	C1=CC=C(C=C1)P(=O)(C2=CC=CC=C2)C3=CC=CC=C3OC4=CC=CC=C4P(=O)(C5=CC=CC=C5)C6=CC=CC=C6	0.73
CC1=C(C=CC(N2C3=C(C(C)(C4=C2C=CC(C(C)(C)C)=C4)C)C=C(C=C3)C(C)(C)C)=C1)C5=NN(N=C5C6=CC=C(C=C6C)N7C8=C(C(C)(C9=C7C=CC(C(C)(C)C)=C9)C)C=C(C=C8)C(C)(C)C)C%10=CC=C(C=C%10)C#N	C1=CC=C(C=C1)P(=O)(C2=CC=CC=C2)C3=CC=CC=C3OC4=CC=CC=C4P(=O)(C5=CC=CC=C5)C6=CC=CC=C6	0.72
C1=CC=C(C2=CC(C3=CC=C(N4C5=CC6=C(C=C5C5=C4C=CC=C5)C4=C(C=CC=C4)C64C5=C(C=CC=C5)C5=C4C=CC=C5)C=C3)=NC(C3=CC=CC=C3)=N2)C=C1	C1=CC=C(C=C1)P(=O)(C2=CC=CC=C2)C3=CC=CC=C3OC4=CC=CC=C4P(=O)(C5=CC=CC=C5)C6=CC=CC=C6	0.72
C1=CC=C(C2=CC(C3=CC=C(N4C5=C(C=CC=C5)C5=C4C=CC4=C5OC5=C4C=CC=C5)C=C3)=NC(C3=CC=CC=C3)=N2)C=C1	C1=CC=C(C=C1)P(=O)(C2=CC=CC=C2)C3=CC=CC=C3OC4=CC=CC=C4P(=O)(C5=CC=CC=C5)C6=CC=CC=C6	0.72
CC(C)(C)C1=CC2=C(C(N3C4=CC=C(C=C4C5=C3C=CC(C(C)(C)C)=C5)C(C)(C)C)=C1)N(C6=NC7=NC(N8C9=C(C=C(C=C9C%10=C8C=CC(C(C)(C)C)=C%10)C(C)(C)C)N%11C%12=CC=C(C=C%12C%13=C%11C=CC(C(C)(C)C)=C%13)C(C)(C)C)=CC=C7C=C6)C%14=C2C=C(C(C)(C)C)C=C%14	C1=CC=C(C=C1)P(=O)(C2=CC=CC=C2)C3=CC=CC=C3OC4=CC=CC=C4P(=O)(C5=CC=CC=C5)C6=CC=CC=C6	0.72
CC(C)(C)C1=CC2=C(C=C1)N(C1=CC=C(S(=O)(=O)C3=CC=CC(S(=O)(=O)C4=CC=C(N5C6=C(C=C(C(C)(C)C)C=C6)C6=C5C=CC(C(C)(C)C)=C6)C=C4)=C3)C=C1)C1=C2C=C(C(C)(C)C)C=C1	C1=CC=C(C=C1)P(=O)(C2=CC=CC=C2)C3=CC=CC=C3OC4=CC=CC=C4P(=O)(C5=CC=CC=C5)C6=CC=CC=C6	0.71
CC1(C)C2=CC=CC3=C2N(C2=CC=CC=C2C32C3=C(C=CC(C#N)=C3)C3=C2C=C(C#N)C=C3)C2=C1C=CC=C2	C1=CC=C(C=C1)P(=O)(C2=CC=CC=C2)C3=CC=CC=C3OC4=CC=CC=C4P(=O)(C5=CC=CC=C5)C6=CC=CC=C6	0.71
C1=CC=C(C2=CC(C3=CC=C(N4C5=C(C=CC=C5)C5=C4C=CC4=C5OC5=C4C=CC=C5)C=C3)=NC(C3=CC=CC=C3)=N2)C=C1	C1=CC=C(C=C1)P(=O)(C2=CC=CC=C2)C3=CC=CC=C3OC4=CC=CC=C4P(=O)(C5=CC=CC=C5)C6=CC=CC=C6	0.71
CC1=C(C=CC(N2C3=C(OC4=C2C=CC=C4)C=CC=C3)=C1)C5=NN(N=C5C6=CC=C(C=C6C)N7C8=C(OC9=C7C=CC=C9)C=CC=C8)C%10=CC=C(C=C%10)C#N	C1=CC=C(C=C1)P(=O)(C2=CC=CC=C2)C3=CC=CC=C3OC4=CC=CC=C4P(=O)(C5=CC=CC=C5)C6=CC=CC=C6	0.69
CC(C)(C)C1=CC2=C(C=C1)N(C1=CC=C3C=CC(N4C5=C(C=C(C(C)(C)C)C=C5)C5=C4C=CC(C(C)(C)C)=C5)=NC3=N1)C1=C2C=C(C(C)(C)C)C=C1	C1=CC=C(C=C1)P(=O)(C2=CC=CC=C2)C3=CC=CC=C3OC4=CC=CC=C4P(=O)(C5=CC=CC=C5)C6=CC=CC=C6	0.675
CC(C)(C)C1=CC2=C(C=C1)N(C1=CC=C(S(=O)(=O)C3=CC=C(S(=O)(=O)C4=CC=C(N5C6=C(C=C(C(C)(C)C)C=C6)C6=C5C=CC(C(C)(C)C)=C6)C=C4)C=C3)C=C1)C1=C2C=C(C(C)(C)C)C=C1	C1=CC=C(C=C1)P(=O)(C2=CC=CC=C2)C3=CC=CC=C3OC4=CC=CC=C4P(=O)(C5=CC=CC=C5)C6=CC=CC=C6	0.666
O=S(C1=CC=C(C=C1)N2C3=CC=CC=C3C4(C5=C2C=CC=C5)C6=CC=CC7=C6N(C8=C4C=CC=C8)C9=CC=CC=C97)(C%10=CC=C(C=C%10)N%11C%12=CC=CC=C%12C%13(C%14=C%11C=CC=C%14)C%15=CC=CC%16=C%15N(C%17=C%13C=CC=C%17)C%18=CC=CC=C%18%16)=O	C1=CC=C(C=C1)P(=O)(C2=CC=CC=C2)C3=CC=CC=C3OC4=CC=CC=C4P(=O)(C5=CC=CC=C5)C6=CC=CC=C6	0.66
CC1(C2=C(N(C3=C1C=CC=C3)C4=CC=C(C=C4)C5=NN(N=C5C6=CC=C(C=C6)N7C8=C(C(C)(C9=C7C=CC=C9)C)C=CC=C8)C%10=CC=C(C=C%10)C#N)C=CC=C2)C	C1=CC=C(C=C1)P(=O)(C2=CC=CC=C2)C3=CC=CC=C3OC4=CC=CC=C4P(=O)(C5=CC=CC=C5)C6=CC=CC=C6	0.66
[H]C1=C(N2C3=CC=CC=C3C4(C5=CC=CC6=C5N(C7=CC=CC=C76)C8=C4C=CC=C8)C9=C2C=CC=C9)C=CC(S(=O)(C%10=CC([H])=C(N%11C%12=CC=CC=C%12C%13(C%14=CC=CC%15=C%14N(C%16=CC=CC=C%16%15)C%17=C%13C=CC=C%17)C%18=C%11C=CC=C%18)C=C%10)=O)=C1	C1=CC=C(C=C1)P(=O)(C2=CC=CC=C2)C3=CC=CC=C3OC4=CC=CC=C4P(=O)(C5=CC=CC=C5)C6=CC=CC=C6	0.66
C1=CC=C(C2=CC(C3=CC=C(N4C5=C(C=CC=C5)C5=C4C=CC4=C5SC5=C4C=CC=C5)C=C3)=NC(C3=CC=CC=C3)=N2)C=C1	C1=CC=C(C=C1)P(=O)(C2=CC=CC=C2)C3=CC=CC=C3OC4=CC=CC=C4P(=O)(C5=CC=CC=C5)C6=CC=CC=C6	0.65
CC1(C2=C(N(C3=C1C=CC=C3)C4=CC5=C(P(C6=CC=CC=C6)(C7=CC=CC=C7O5)=O)C=C4)C=CC=C2)C	C1=CC=C(C=C1)P(=O)(C2=CC=CC=C2)C3=CC=CC=C3OC4=CC=CC=C4P(=O)(C5=CC=CC=C5)C6=CC=CC=C6	0.62
O=S(C1=CC(C)=C(N2C3=CC=CC=C3C4(C5=C2C=CC=C5)C6=CC=CC7=C6N(C8=C4C=CC=C8)C9=CC=CC=C97)C=C1)(C%10=CC(C)=C(C=C%10)N%11C%12=CC=CC=C%12C%13(C%14=C%11C=CC=C%14)C%15=CC=CC%16=C%15N(C%17=C%13C=CC=C%17)C%18=CC=CC=C%18%16)=O	C1=CC=C(C=C1)P(=O)(C2=CC=CC=C2)C3=CC=CC=C3OC4=CC=CC=C4P(=O)(C5=CC=CC=C5)C6=CC=CC=C6	0.6
CC1=CC(C)=C(B(C2=C(C)C=C(C)C=C2C)C2=C(C)C=C(N3C4=C(C=CC=C4)C(C4=CC=CC=C4)(C4=CC=CC=C4)C4=C3C=CC=C4)C=C2C)C(C)=C1	C1=CC=C(C=C1)P(=O)(C2=CC=CC=C2)C3=CC=CC=C3OC4=CC=CC=C4P(=O)(C5=CC=CC=C5)C6=CC=CC=C6	0.6
O=S(C1=CC(C)=C(N2C3=CC=CC=C3C4(C5=CC=CC6=C5N(C7=CC=CC=C76)C8=C4C=CC=C8)C9=C2C=CC=C9)C=C1)(C%10=CC(C)=C(N%11C%12=CC=CC=C%12C%13(C%14=CC=CC%15=C%14N(C%16=CC=CC=C%16%15)C%17=C%13C=CC=C%17)C%18=C%11C=CC=C%18)C=C%10)=O	C1=CC=C(C=C1)P(=O)(C2=CC=CC=C2)C3=CC=CC=C3OC4=CC=CC=C4P(=O)(C5=CC=CC=C5)C6=CC=CC=C6	0.6
CC(C)(C)C1=CC2=C(C=C1)N(C1=CC=C(C3=NC(C4=CC=CC=C4)=NC(C4=CC=CC=C4)=N3)C=C1)C1=C2C=C(C(C)(C)C)C=C1C1=CC2=C(C=C1)N(C1=CC=CC=C1)C1=C2C=CC=C1	C1=CC=C(C=C1)P(=O)(C2=CC=CC=C2)C3=CC=CC=C3OC4=CC=CC=C4P(=O)(C5=CC=CC=C5)C6=CC=CC=C6	0.57
O=C(C1=CC=C(N2C3=C(C=CC=C3)C3=C2C=CC=C3)C=C1)C1=CC=C(N2C3=C(C=CC=C3)C3=C2C=CC=C3)C=C1	C1=CC=C(C=C1)P(=O)(C2=CC=CC=C2)C3=CC=CC=C3OC4=CC=CC=C4P(=O)(C5=CC=CC=C5)C6=CC=CC=C6	0.55
C1=CC2=C(C=C1)N(C1=CC=C3C=CC(N4C5=C(C=CC=C5)C5=C4C=CC=C5)=NC3=N1)C1=C2C=CC=C1	C1=CC=C(C=C1)P(=O)(C2=CC=CC=C2)C3=CC=CC=C3OC4=CC=CC=C4P(=O)(C5=CC=CC=C5)C6=CC=CC=C6	0.546
CC1=CC(N2C3=C(C=CC=C3)C(C3=CC=CC=C3)(C3=CC=CC=C3)C3=C2C=CC=C3)=CC(C)=C1B1C2=C(C=CC=C2)CC2=C1C=CC=C2	C1=CC=C(C=C1)P(=O)(C2=CC=CC=C2)C3=CC=CC=C3OC4=CC=CC=C4P(=O)(C5=CC=CC=C5)C6=CC=CC=C6	0.54
C1=CC2=C(C=C1)N(C1=CC3=C(C=C1)N(C1=CC4=C5C(=C1)C1=C(C=CC=C1)N5C1=C4C=CC=C1)C1=C3C=CC=C1)C1=C2C=CC=C1	C1=CC=C(C=C1)P(=O)(C2=CC=CC=C2)C3=CC=CC=C3OC4=CC=CC=C4P(=O)(C5=CC=CC=C5)C6=CC=CC=C6	0.53
CC1=CC=CC2=C1N(C3=C2C=CC=C3)C(C=C4)=CC=C4C5=NC(C6=CC=CC=C6)=NC(C7=CC=CC=C7)=N5	C1=CC=C(C=C1)P(=O)(C2=CC=CC=C2)C3=CC=CC=C3OC4=CC=CC=C4P(=O)(C5=CC=CC=C5)C6=CC=CC=C6	0.513
C1=CC=C(C2=NC(C3=CC=CC=C3)=NC(N3C4=C(C=CC=C4)C4=C3C3=C(C=C4)N(C4=CC=CC=C4)C4=C3C=CC=C4)=N2)C=C1	C1=CC=C(C=C1)P(=O)(C2=CC=CC=C2)C3=CC=CC=C3OC4=CC=CC=C4P(=O)(C5=CC=CC=C5)C6=CC=CC=C6	0.51
FC1=CC(C2=NC(C3=CC=CC=C3)=NC(C3=CC=CC=C3)=N2)=CC=C1N1C2=C(C=CC=C2)C2=C1C=CC1=C2C2=C(C=CC=C2)C12C1=C(C=CC=C1)C1=C2C=CC=C1	C1=CC=C(C=C1)P(=O)(C2=CC=CC=C2)C3=CC=CC=C3OC4=CC=CC=C4P(=O)(C5=CC=CC=C5)C6=CC=CC=C6	0.51
CC(C)(C)C1=CC2=C(C=C1)N(C1=CC3=C(C=C1)N1C4=C(C=C(N5C6=C(C=C(C(C)(C)C)C=C6)C6=C5C=CC(C(C)(C)C)=C6)C=C4)C4=C1C3=CC(C#N)=C4)C1=C2C=C(C(C)(C)C)C=C1	C1=CC=C(C=C1)P(=O)(C2=CC=CC=C2)C3=CC=CC=C3OC4=CC=CC=C4P(=O)(C5=CC=CC=C5)C6=CC=CC=C6	0.5
N#CC1=CC=C2C(=C1)C1(C3=C2C=CC(C#N)=C3)C2=C(C=CC=C2)N(C2=CC=CC=C2)C2=C1C=CC=C2	C1=CC=C(C=C1)P(=O)(C2=CC=CC=C2)C3=CC=CC=C3OC4=CC=CC=C4P(=O)(C5=CC=CC=C5)C6=CC=CC=C6	0.47
CC(C)(C)C1=CC2=C(N(C3=C2C=C(C=C3)C(C)(C)C)C4=NC5=NC=CC=C5C=C4)C(N6C7=CC=C(C(C)(C)C)C=C7C8=C6C=CC(C(C)(C)C)=C8)=C1	C1=CC=C(C=C1)P(=O)(C2=CC=CC=C2)C3=CC=CC=C3OC4=CC=CC=C4P(=O)(C5=CC=CC=C5)C6=CC=CC=C6	0.46
C1=CC=C(C2=NC(C3=CC=CC=C3)=NC(C3=CC=C(N4C5=C(C=CC=C5)C5=C4C=CC4=C5C5=C(C=CC=C5)C45C4=C(C=CC=C4)C4=C5C=CC=C4)C=C3)=N2)C=C1	C1=CC=C(C=C1)P(=O)(C2=CC=CC=C2)C3=CC=CC=C3OC4=CC=CC=C4P(=O)(C5=CC=CC=C5)C6=CC=CC=C6	0.45
CC1=CC=CC2=C1N(C3=C2C=CC=C3)C(C=C4)=CC=C4C5=NC(C6=CC=CC=C6)=CC(C7=CC=CC=C7)=N5	C1=CC=C(C=C1)P(=O)(C2=CC=CC=C2)C3=CC=CC=C3OC4=CC=CC=C4P(=O)(C5=CC=CC=C5)C6=CC=CC=C6	0.421
C1=CC2=C(C=C1)N(C1=CC=C3C(=C1)C1=C(C=CC=C1)N1C=CN=C31)C1=C(C=CC=C1)O2	C1=CC=C(C=C1)P(=O)(C2=CC=CC=C2)C3=CC=CC=C3OC4=CC=CC=C4P(=O)(C5=CC=CC=C5)C6=CC=CC=C6	0.27
F[B-]12OC3=CC(N4C5=C(C6=C4C=CC=C6)C=CC=C5)=CC=C3C7=CC=CC(C8=C(O2)C=C(C=C8)N9C%10=C(C%11=C9C=CC=C%11)C=CC=C%10)=[N+]71	C1=CC=C(C=C1)P(=O)(C2=CC=CC=C2)C3=CC=C(C=C3)C(C4=CC=C(C=C4)P(=O)(C5=CC=CC=C5)C6=CC=CC=C6)(C(F)(F)F)C(F)(F)F	0.53
F[B-]1(OC2=CC(C3=CC=CC=C3C)=CC=C2C4=CC=CC5=[N+]14)OC6=C5C=CC(C7=C(C=CC=C7)C)=C6	C1=CC=C(C=C1)P(=O)(C2=CC=CC=C2)C3=CC=C(C=C3)C(C4=CC=C(C=C4)P(=O)(C5=CC=CC=C5)C6=CC=CC=C6)(C(F)(F)F)C(F)(F)F	0.41
CC1=CC=CC=C1C2=CC=C3O[B-]4(OC5=C(C6=[N+]4C(C3=C2)=CC=C6)C=C(C=C5)C7=C(C=CC=C7)C)F	C1=CC=C(C=C1)P(=O)(C2=CC=CC=C2)C3=CC=C(C=C3)C(C4=CC=C(C=C4)P(=O)(C5=CC=CC=C5)C6=CC=CC=C6)(C(F)(F)F)C(F)(F)F	0.39
C1(N2C3=C(C=CC=C3)OC4=C2C=CC=C4)=CC=C(C=C1)C5=NC6=CC7=C(C8C9=C(C7C%10=C8C=CC=C%10)C=CC=C9)C=C6N=C5C%11=CC=C(N%12C%13=C(C=CC=C%13)OC%14=C%12C=CC=C%14)C=C%11	C1=CC=C(C=C1)P(=O)(C2=CC=C(C=C2)N3C4=CC=CC=C4C5=CC=CC=C53)C6=CC=C(C=C6)N7C8=CC=CC=C8C9=CC=CC=C97	0.727
N#CC1=C(N2C3=C(C=CC=C3)C3=C2C=CC=C3)C(N2C3=C(C=CC=C3)C3=C2C=CCC3)=C(N2C3=C(C=CC=C3)C3=C2C=CC=C3)C(F)=C1N1C2=C(C=CC=C2)C2=C1C=CC=C2	C1=CC=C(C=C1)N2C3=C(C=C(C=C3)[Si](C4=CC=CC=C4)(C5=CC=CC=C5)C6=CC=CC=C6)C7=C2C=CC(=C7)[Si](C8=CC=CC=C8)(C9=CC=CC=C9)C1=CC=CC=C1	1
N#CC1=C(N2C3=C(C=CC=C3)C3=C2C=CC=C3)C(F)=C(N2C3=C(C=CC=C3)C3=C2C=CC=C3)C(F)=C1N1C2=C(C=CC=C2)C2=C1C=CC=C2	C1=CC=C(C=C1)N2C3=C(C=C(C=C3)[Si](C4=CC=CC=C4)(C5=CC=CC=C5)C6=CC=CC=C6)C7=C2C=CC(=C7)[Si](C8=CC=CC=C8)(C9=CC=CC=C9)C1=CC=CC=C1	0.74
CC1(C)C(C=CC=C2)=C2C3=CC4=C(C=C31)N(C5=C4C=CC=C5)C6=CC=C(C7=NC(C8=CC=CC=C8)=NC(C9=CC=CC=C9)=N7)C=C6C#N	C1=CC=C(C=C1)C2=NC(=NC(=N2)C3=CC=C(C=C3)C4=CC(=CC=C4)N5C6=CC=CC=C6C7=CC=CC=C75)C8=CC=CC=C8	0.93
N#CC1=CC(C2=NC(C3=CC=CC=C3)=NC(C4=CC=CC=C4)=N2)=CC=C1N5C6=C(C7=C5C8=C(C9=C(N8C%10=CC=CC=C%10)C=CC=C9)C=C7)C=CC=C6	C1=CC=C(C=C1)C2=NC(=NC(=N2)C3=CC=C(C=C3)C4=CC(=CC=C4)N5C6=CC=CC=C6C7=CC=CC=C75)C8=CC=CC=C8	0.91
N#CC1=CC(C2=NC(C3=CC=CC=C3)=NC(C3=CC=CC=C3)=N2)=CC=C1N1C2=C(C=CC=C2)C2=C1C=C1C(=C2)C2=C(C=CC=C2)N1C1=CC=CC=C1	C1=CC=C(C=C1)C2=NC(=NC(=N2)C3=CC=C(C=C3)C4=CC(=CC=C4)N5C6=CC=CC=C6C7=CC=CC=C75)C8=CC=CC=C8	0.87
N#CC1=CC(C2=NC(C3=CC=CC=C3)=NC(C3=CC=CC=C3)=N2)=CC=C1N1C2=C(C=CC=C2)C2=C1C1=C(C=C2)N(C2=CC=CC=C2)C2=C1C=CC=C2	C1=CC=C(C=C1)C2=NC(=NC(=N2)C3=CC=C(C=C3)C4=CC(=CC=C4)N5C6=CC=CC=C6C7=CC=CC=C75)C8=CC=CC=C8	0.85
C1(C2=NC(C3=CC=CC=C3)=NC(C4=CC=C(C=C4)N5C6=C(C7=C5C=CC(C8=CC=C9C(C=CN9C%10=CN=CC=C%10)=C8)=C7)C=CC=C6)=N2)=CC=CC=C1	C1=CC(N2C3=C(C=CC=C3)C3=C2C=CC=C3)=NC(N2C3=C(C=CC=C3)C3=C2C=CC=C3)=C1	0.81
C1=CC=C(C2=NC(C3=CC=CC=C3)=NC(C3=CC=C(N4C5=C(C=CC=C5)C5=C4C=CC(C4=CC=C6C(=C4)C4=C(C=CC=C4)N6C4=CC=CC=C4)=C5)C=C3)=N2)C=C1	C1=CC(N2C3=C(C=CC=C3)C3=C2C=CC=C3)=NC(N2C3=C(C=CC=C3)C3=C2C=CC=C3)=C1	0.72
C1=CC=C(C2=NC(C3=CC=CC=C3)=NC(C3=CC=C(N4C5=C(C=C(C6=CC=C7C(=C6)C6=C(C=CC=C6)N7C6=CC=CC=C6)C=C5)C5=C4C=CC(C4=CC6=C(C=C4)N(C4=CC=CC=C4)C4=C6C=CC=C4)=C5)C=C3)=N2)C=C1	C1=CC(N2C3=C(C=CC=C3)C3=C2C=CC=C3)=NC(N2C3=C(C=CC=C3)C3=C2C=CC=C3)=C1	0.72
C1=CC=C(C2=NC(C3=CC=CC=C3)=NC(C3=CC=C(N4C5=C(C=CC=C5)C5=C4C=CC(C4=CC=C6C(=C4)C4=C(C=CC=C4)N6C4=CN=CC=C4)=C5)C=C3)=N2)C=C1	C1=CC(N2C3=C(C=CC=C3)C3=C2C=CC=C3)=NC(N2C3=C(C=CC=C3)C3=C2C=CC=C3)=C1	0.68
CCN1C2=CC=CC=C2C3=CC4=C(C=C31)N(C5=C4C=CC=C5)C(C=C6)=CC=C6C7=NC(C8=CC=CC=C8)=NC(C9=CC=CC=C9)=N7	C1=CC(N2C3=C(C=CC=C3)C3=C2C=CC=C3)=NC(N2C3=C(C=CC=C3)C3=C2C=CC=C3)=C1	0.59
CCN1C2=CC=CC=C2C3=CC4=C(C(C5=CC=CC=C5)=C31)N(C6=C4C=CC=C6)C(C=C7)=CC=C7C8=NC(C9=CC=CC=C9)=NC(C%10=CC=CC=C%10)=N8	C1=CC(N2C3=C(C=CC=C3)C3=C2C=CC=C3)=NC(N2C3=C(C=CC=C3)C3=C2C=CC=C3)=C1	0.49
C1=CC=C(N2C3=CC=CC=C3B3C4=CC=CC5=C4N(C4=CC=CC2=C34)C2=C5C=CC=C2)C=C1	C1=CC(C2=NC(C3=CC=CC(N4C5=C(C=CC=C5)C5=C4C=CC=C5)=C3)=CC=C2)=CC(N2C3=C(C=CC=C3)C3=C2C=CC=C3)=C1	0.98
C1(N(C2=CC3=C4B(C5=CC=C(C6=C5N(C7=C6C=CC=C7)C4=C2)N(C8=CC=CC=C8)C9=CC=CC=C9)C%10=CC=CC=C%10N3C%11=CC=CC=C%11)C%12=CC=CC=C%12)=CC=CC=C1	C1=CC(C2=NC(C3=CC=CC(N4C5=C(C=CC=C5)C5=C4C=CC=C5)=C3)=CC=C2)=CC(N2C3=C(C=CC=C3)C3=C2C=CC=C3)=C1	0.94
C1(N(C2=CC3=C4B(C5=CC=CC6=C5N(C7=C6C=CC=C7)C4=C2)C8=CC=CC=C8N3C9=CC=CC=C9)C%10=CC=CC=C%10)=CC=CC=C1	C1=CC(C2=NC(C3=CC=CC(N4C5=C(C=CC=C5)C5=C4C=CC=C5)=C3)=CC=C2)=CC(N2C3=C(C=CC=C3)C3=C2C=CC=C3)=C1	0.92
C1(C2=NC(C3=CC=CC=C3)=NC(C4=CC=C(C=C4)N5C6=CC=CC=C6C(C7=C8OC9=C(C8=CC=C7)C=CC=C9)(C%10=CC=CC=C%105)C%11=CC=CC=C%11)=N2)=CC=CC=C1	C1=CC(C2=NC(C3=CC=CC(N4C5=C(C=CC=C5)C5=C4C=CC=C5)=C3)=CC=C2)=CC(N2C3=C(C=CC=C3)C3=C2C=CC=C3)=C1	0.9
C1([Si]2(C3=C(N(C4=C2C=CC=C4)C5=CC6=C7B(C8=C(O6)C=CC=C8)C9=CC=CC=C9OC7=C5)C=CC=C3)C%10=CC=CC=C%10)=CC=CC=C1	C1([Si]2(C3=C(N(C4=C2C=CC=C4)C5=CC6=C7B(C8=C(O6)C=CC=C8)C9=CC=CC=C9OC7=C5)C=CC=C3)C%10=CC=CC=C%10)=CC=CC=C1	0.43
C1([Si]2(C3=C(N(C4=C2C=CC=C4)C5=CC=C6B7C8=C(OC9=C7C(OC6=C5)=CC=C9)C=C(C=C8)N%10C%11=C([Si](C%12=CC=CC=C%12)(C%13=C%10C=CC=C%13)C%14=CC=CC=C%14)C=CC=C%11)C=CC=C3)C%15=CC=CC=C%15)=CC=CC=C1	C1([Si]2(C3=C(N(C4=C2C=CC=C4)C5=CC=C6B7C8=C(OC9=C7C(OC6=C5)=CC=C9)C=C(C=C8)N%10C%11=C([Si](C%12=CC=CC=C%12)(C%13=C%10C=CC=C%13)C%14=CC=CC=C%14)C=CC=C%11)C=CC=C3)C%15=CC=CC=C%15)=CC=CC=C1	0.73
CC1(C)C(C=CC=C2)=C2N(C3=CC=C(C#N)C=C3)C4=C1C=CC=C4	C(Cl)Cl	0.838
CC(C)C1=CC=C(C2=CC3=C(C=C2)C2=C(N=C4OC(C5=CC=CC=C5)=CC4=N2)C2=C3C=C(C3=CC=C(C(C)C)C=C3)C=C2)C=C1	C(Cl)Cl	0.791
C1(C2=CC3=NC4=C(C5=C(C6=C4C=CC=C6)C=CC=C5)N=C3O2)=CC=CC=C1	C(Cl)Cl	0.72
C1(C2=CC3=NC4=C(C5=C(C6=C4C=CC=N6)N=CC=C5)N=C3O2)=CC=CC=C1	C(Cl)Cl	0.7
N#CC1=CC=C(C=C1)N2C3=C(C4(C5=C2C=CC=C5)C6=C(N(C7=C4C=CC=C7)C8=CC=C(C#N)C=C8)C=CC=C6)C=CC=C3	C(Cl)Cl	0.557
C12=CC3=C(C=C1C=CC=C2)N=C4C=C(C5=CC=CC=C5)OC4=N3	C(Cl)Cl	0.092
CC(C)(C)C1=CC2=C(C=C1)N(C1=CC=C(S(=O)(=O)C3=CC=CC(S(=O)(=O)C4=CC=C(N5C6=C(C=C(C(C)(C)C)C=C6)C6=C5C=CC(C(C)(C)C)=C6)C=C4)=C3)C=C1)C1=C2C=C(C(C)(C)C)C=C1	C(Cl)(Cl)Cl	0.693
CC(C)(C)C1=CC2=C(C=C1)N(C1=CC=C(S(=O)(=O)C3=CC=C(S(=O)(=O)C4=CC=C(N5C6=C(C=C(C(C)(C)C)C=C6)C6=C5C=CC(C(C)(C)C)=C6)C=C4)C=C3)C=C1)C1=C2C=C(C(C)(C)C)C=C1	C(Cl)(Cl)Cl	0.563
CC(C)(C)C1=CC=C(N(C2=CC=C(C(C)(C)C)C=C2)C2=CC3=C4B(C5=CC(C(C)(C)C)=CC=C5N3C3=CC=C(C(C)(C)C)C=C3)C3=CC=CC5=C3N(C4=C2)C2=C(C=CC=C2)C5(C)C)C=C1	CC(=C)C(=O)OC	0.897
CC1=CC(C)=CC(C)=C1C2=CC3=C(N4C5=C(C6=C4C3=CC(C7=C(C=C(C=C7C)C)C)=C6)C=C8C(C9=C%10C(C%11=C(N8%10)C=CC(C%12=C(C=C(C=C%12C)C)C)=C%11)=CC(C%13=C(C=C(C=C%13C)C)C)=C9)=C5)C=C2	CC(=C)C(=O)OC	0.67
N#CC1=C(C#N)C=C(N2C3=C(C=C(C=C3)P(C4=CC=CC=C4)(C5=CC=CC=C5)=S)C6=C2C=CC=C6)C(N7C8=CC=C(C=C8C9=C7C=CC=C9)P(C%10=CC=CC=C%10)(C%11=CC=CC=C%11)=S)=C1	CC(=C)C(=O)OC	0.59
N#CC1=C(C=C(C(N2C3=CC=C(P(C4=CC=CC=C4)(C5=CC=CC=C5)=O)C=C3C6=C2C=CC=C6)=C1)N7C8=C(C9=C7C=CC=C9)C=C(P(C%10=CC=CC=C%10)(C%11=CC=CC=C%11)=O)C=C8)C#N	CC(=C)C(=O)OC	0.56
C1=CC=C(N(C2=CC=CC=C2)C2=CC3=C(C=C2)N(C2=CC=C(C4=CC(C5=CC=C(N6C7=C(C=C(N(C8=CC=CC=C8)C8=CC=CC=C8)C=C7)C7=C6C=CC(N(C6=CC=CC=C6)C6=CC=CC=C6)=C7)C=C5)=NC=N4)C=C2)C2=C3C=C(N(C3=CC=CC=C3)C3=CC=CC=C3)C=C2)C=C1	CC(=C)C(=O)OC	0.55
C1=CC2=C(C=C1)N1C3=C(C=CC=C3)C3=C1C2=CC=C3	CC(=C)C(=O)OC	0.37
CC(C)(C1=CC2=C(N(C3=C2C=C(C=C3)C(C)(C)C)C4=CC5=C(C6=NC7=C(F)C=CC=C7N=C6C8=C5C=C(C=C8)N9C%10=C(C%11=C9C=CC(C(C)(C)C)=C%11)C=C(C=C%10)C(C)(C)C)C=C4)C=C1)C	CC(=C)C(=O)OC	0.34
C1=CC=C(C2=CC3=C(C=C2)N(C2=CC(N4C5=C(C=C(C6=CC=CC=C6)C=C5)C5=C4C=CC(C4=CC=CC=C4)=C5)=NC=N2)C2=C3C=C(C3=CC=CC=C3)C=C2)C=C1	CC(=C)C(=O)OC	0.33
CC1(C)C2=C(C=CC=C2)N(C2=CC3=C(C=C2)C2=NC4=CC=CC(F)=C4N=C2C2=C3C=C(N3C4=C(C=CC=C4)C(C)(C)C4=C3C=CC=C4)C=C2)C2=C1C=CC=C2	CC(=C)C(=O)OC	0.28
O=P(C1=CC=CC=C1)(C1=CC=CC=C1)C1=CC=C2NC3=C(C=C(P(=O)(C4=CC=CC=C4)C4=CC=CC=C4)C=C3)C2=C1	CC(=C)C(=O)OC	0.28
CC(C)(C)C1=CC2=C(C=C1)N(C1=CC=C3C=CC(N4C5=C(C=C(C(C)(C)C)C=C5)C5=C4C=CC(C(C)(C)C)=C5)=NC3=N1)C1=C2C=C(C(C)(C)C)C=C1	CC(C)(C)C1=CC2=C(C=C1)N(C1=CC=C3C=CC(N4C5=C(C=C(C(C)(C)C)C=C5)C5=C4C=CC(C(C)(C)C)=C5)=NC3=N1)C1=C2C=C(C(C)(C)C)C=C1	0.229
C1=CC=C(N(C2=CC=CC=C2)C2=CC3=C(C=C2)N(C2=CC(N4C5=C(C=C(N(C6=CC=CC=C6)C6=CC=CC=C6)C=C5)C5=C4C=CC(N(C4=CC=CC=C4)C4=CC=CC=C4)=C5)=NC=N2)C2=C3C=C(N(C3=CC=CC=C3)C3=CC=CC=C3)C=C2)C=C1	CC(=C)C(=O)OC	0.17
C1=CC2=C(C=C1)N(C1=CC=C3C=CC(N4C5=C(C=CC=C5)C5=C4C=CC=C5)=NC3=N1)C1=C2C=CC=C1	C1=CC2=C(C=C1)N(C1=CC=C3C=CC(N4C5=C(C=CC=C5)C5=C4C=CC=C5)=NC3=N1)C1=C2C=CC=C1	0.134
FC1=C2N=C3C(=NC2=CC=C1)C1=C(C=C(N2C4=C(C=CC=C4)OC4=C2C=CC=C4)C=C1)C1=C3C=CC(N2C3=C(C=CC=C3)OC3=C2C=CC=C3)=C1	CC(=C)C(=O)OC	0.06
The testing set
C1=CC=C(C2=NC(C3=CC=CC=C3)=NC(C3=CC=C(N4C5=C(C=CC=C5)C5=C4C4=C(C=C5)N(C5=CC=CC=C5)C5=C4C=CC=C5)C=C3)=N2)C=C1	C1=CC=C(C=C1)C2=NC(=NC(=N2)C3=CC=C(C=C3)C4=CC(=CC=C4)N5C6=CC=CC=C6C7=CC=CC=C75)C8=CC=CC=C8	0.8
CC(C)(C)C1=CC2=C(C=C1)N1C3=C(C=C(C(C)(C)C)C=C23)C(=O)C2=CC=CC(N3C4=C(C=CC=C4)C4=C3C=CC=C4)=C21	C1=CC=C2C(=C1)C3=CC=CC=C3N2C4=CC=CC(=C4)C5=CC(=CC=C5)N6C7=CC=CC=C7C8=CC=CC=C86	0.395
CC(C)(C)C1=CC=C(N2C3=CC(N4C5=C(C=CC=C5)C(C5=CC=CC=C5)(C5=CC=CC=C5)C5=C4C=CC=C5)=CC4=C3B(C3=CC(C(C)(C)C)=CC=C3N4C3=CC=C(C(C)(C)C)C=C3)C3=C2C=CC(C(C)(C)C)=C3)C=C1	CC(=C)C(=O)OC	0.944
C1=CC2=C(C=C1)N(C1=CC3=C(C=C1)C1=C(C=C(N4C5=C(C=CC=C5)OC5=C4C=CC=C5)C=C1)C1=C3N=CC=N1)C1=C(C=CC=C1)O2	CC1=CC=CC=C1	0.24
N#CC1=C(C2=CC=C(N3C4=C(C=CC=C4)C4=C3C=CC=C4)C=C2)C=CC=C1OC1=CC=CC=C1	N#CC1=C(C2=CC=C(N3C4=C(C=CC=C4)C4=C3C=CC=C4)C=C2)C=CC=C1OC1=CC=CC=C1	0.74
CC1=CC(C)=CC(C)=C1C2=CC3=C(N4C5=C(C6=C4C3=CC(C7=C(C=C(C=C7C)C)C)=C6)C=C8C(C9=C%10C(C%11=C(N8%10)C=CC(C%12=C(C=C(C=C%12C)C)C)=C%11)=CC(C%13=C(C=C(C=C%13C)C)C)=C9)=C5)C=C2	C1=CC=C2C(=C1)C3=CC=CC=C3N2C4=CC(=CC=C4)N5C6=CC=CC=C6C7=CC=CC=C75	0.82
CC1=CC2=C3B(C4=C(N2C5=CC=C(C=C5)C(C)(C)C)C=CC(C(C)(C)C)=C4)C6=C(N(C3=C1)C7=CC=C(C=C7)C(C)(C)C)C=CC(C(C)(C)C)=C6	C1=CC=C2C(=C1)C3=CC=CC=C3N2C4=CC=CC(=C4)C5=CC(=CC=C5)N6C7=CC=CC=C7C8=CC=CC=C86	0.84
O=C1C2=C(C=CC=C2)C3(C4=C1C=CC(N5C6=C(C=CC=C6)C7(C8=C(C=CC=C8)C9=C7C=CC=C9)C%10=C5C=CC=C%10)=C4)C%11=CC=CC=C%11C%12=C3C(F)=CC=C%12C	O=C1C2=C(C=CC=C2)C3(C4=C1C=CC(N5C6=C(C=CC=C6)C7(C8=C(C=CC=C8)C9=C7C=CC=C9)C%10=C5C=CC=C%10)=C4)C%11=CC=CC=C%11C%12=C3C(F)=CC=C%12C	0.96
O=C(C1=CC=C(N(C2=CC=CC=C2)C2=CC3=C(C=CC=C3)C=C2)C=C1)C1=CC=C(N(C2=CC=CC=C2)C2=CC3=C(C=CC=C3)C=C2)C=C1	C1CCOC1	0.18
CC1=CC(C)=C(C2=CC3=C(C=C2)N2C4=C(C=C(C5=C(C)C=C(C)C=C5C)C=C4)C4=C2C3=CC(C2=C(C)C=C(C)C=C2C)=C4)C(C)=C1	CC(=C)C(=O)OC	0.58
CC1=CC2=C(C=C1)N(C3=C2C=C(C)C=C3)C4=NC(N5C6=C(C7=C5C=CC(C)=C7)C=C(C)C=C6)=CC(C8=CC(N9C%10=C(C%11=C9C=CC(C)=C%11)C=C(C)C=C%10)=NC(N(C%12=C%13C=C(C)C=C%12)C%14=C%13C=C(C)C=C%14)=C8)=C4	C1=CC=C(C=C1)P(=O)(C2=CC=CC=C2)C3=CC4=C(C=C3)SC5=C4C=C(C=C5)P(=O)(C6=CC=CC=C6)C7=CC=CC=C7	0.84
CC(C)(C)C1=CC=CC=C1N(C1=CC=CC=C1)C1=CC=C(S(=O)(=O)C2=CC=C(S(=O)(=O)C3=CC=C(N(C4=CC=CC=C4)C4=C(C(C)(C)C)C=CC=C4)C=C3)C=C2)C=C1	CC1=CC=CC=C1	0.82
C1=CC=C(C2=NC(C3=CC=CC=C3)=NC(C3=CC=C(N4C5=C(C=CC=C5)C5=C4C=CC(C4=CC=C6C(=C4)C4=C(C=CC=C4)N6C4=CC=CC=C4)=C5)C=C3)=N2)C=C1	CC1=CC=CC=C1	0.9
CC1=CC(C)=C(B(C2=C(C)C=C(C)C=C2C)C2=C(C)C=C(N3C4=C(C=CC=C4)C4=C3C=CC(N(C3=CC=CC=C3)C3=CC=CC=C3)=C4)C=C2C)C(C)=C1	CC1=CC=CC=C1	0.91
CC1=CC(C2=NC(C3=CC=CC=C3)=NC(C3=CC=CC=C3)=N2)=CC=C1N1C2=C(C=CC=C2)C2=C1C=CC=C2	C1=CC=C2C(=C1)C3=CC=CC=C3N2C4=CC(=CC=C4)N5C6=CC=CC=C6C7=CC=CC=C75	0.575
O=C(N(C1=O)CC(CCCC)CC)C2=CC=C(N3C4=CC=C(C=C4C(C)(C)C5=C3C=CC(C(C)(C)C)=C5)C(C)(C)C)C6=CC=CC1=C26	C1CCOC1	0.01
CC(C)C1=CC(C(C)C)=C(B2C3=CC=CC=C3OC3=C2C=CC(N2C4=C(C=CC=C4)C(C)(C)C4=C2C=CC=C4)=C3)C(C(C)C)=C1	CC1=CC=CC=C1	1
O=C(C1=CC=CC=C1O2)C(C=C3N4C5=C(C6=C4C=CC(C(C)(C)C)=C6)C=C(C(C)(C)C)C=C5)=C2C=C3N(C7=C8C=C(OC)C=C7)C9=C8C=CC=C9	O=C(C1=CC=CC=C1O2)C(C=C3N4C5=C(C6=C4C=CC(C(C)(C)C)=C6)C=C(C(C)(C)C)C=C5)=C2C=C3N(C7=C8C=C(OC)C=C7)C9=C8C=CC=C9	0.22
CC(C)(C)C1=CC2=C(C=C1)N(C1=CC=C3C(=C1)C(=O)C1=C(C=CC(N4C5=C(C=C(C(C)(C)C)C=C5)C5=C4C=CC(C(C)(C)C)=C5)=C1)N3C1=CC=CC=C1)C1=C2C=C(C(C)(C)C)C=C1	C1=CC=C(C=C1)P(=O)(C2=CC=CC=C2)C3=CC=CC=C3OC4=CC=CC=C4P(=O)(C5=CC=CC=C5)C6=CC=CC=C6	0.485
COC1=CC2=C(C=C1)N(C1=CC3=C(C=C1N1C4=C(C=CC=C4)C4=C1C=CC=C4)C(=O)C1=CC=CC=C1O3)C1=C2C=CC=C1	COC1=CC2=C(C=C1)N(C1=CC3=C(C=C1N1C4=C(C=CC=C4)C4=C1C=CC=C4)C(=O)C1=CC=CC=C1O3)C1=C2C=CC=C1	0.19
CC(C)(C1=CC2=C(OC3=CC(N4C5=C(C6=C4C=CC(C7=CC=C(C(C)(C)C)C=C7)=C6)C=C(C8=CC=C(C(C)(C)C)C=C8)C=C5)=CC9=C3B2C%10=C(O9)C=CC(C(C)(C)C)=C%10)C=C1)C	CC(C)(C1=CC2=C(OC3=CC(N4C5=C(C6=C4C=CC(C7=CC=C(C(C)(C)C)C=C7)=C6)C=C(C8=CC=C(C(C)(C)C)C=C8)C=C5)=CC9=C3B2C%10=C(O9)C=CC(C(C)(C)C)=C%10)C=C1)C	0.498
CC1=CC=CC2=C1N(C3=C2C=CC=C3)C4=CC(N5C6=C(C7=C5C(C)=CC=C7)C=CC=C6)=C(C=C4C#N)C#N	CC1=CC=CC=C1	0.44
CC(C)(C)C1=CC=C2C(=C1)C1=C(C=CC(C(C)(C)C)=C1)N2C1=CC=C(S(=O)(=O)C2=CC=C(N3C4=CC=C(C(C)(C)C)C=C4C4=C3C=CC(C(C)(C)C)=C4)C=C2)C=C1	CC1=CC=CC=C1	0.69
CC1=CC(C)=C(B(C2=CC3=C(C=C2)N2C4=C(C=CC=C4)OC4=C2C(=CC=C4)C3(C2=CC=CC=C2)C2=CC=CC=C2)C2=C(C)C=C(C)C=C2C)C(C)=C1	C1=CC=C(C=C1)P(=O)(C2=CC=CC=C2)C3=CC=CC=C3OC4=CC=CC=C4P(=O)(C5=CC=CC=C5)C6=CC=CC=C6	0.93
N#CC(C=C1C2=NC(C3=CC=CC=C3)=NC(C4=CC=CC=C4)=N2)=C(C=C1)N5C6=C(C7=C5C8=C(N(C9=C8C=CC=C9)C%10=CC=CC=C%10)C=C7)C=CC=C6	C1=CC=C(C=C1)C2=NC(=NC(=N2)C3=CC=C(C=C3)C4=CC(=CC=C4)N5C6=CC=CC=C6C7=CC=CC=C75)C8=CC=CC=C8	0.85
N#CC1=CC(C#N)=C(N2C3=C(C=CC=C3)C3=C2C=CC=C3)C=C1N1C2=C(C=CC=C2)C2=C1C=CC=C2C1=CC=CC2=C1C1=C(C=CC=C1)N2C1=CC(N2C3=C(C=CC=C3)C3=C2C=CC=C3)=C(C#N)C=C1C#N	CC1=CC=CC=C1	0.61
CC(C)(C1=CC2=C(C=C1)OC1=C3B2C2=CC=C(N4C5=C(C=CC=C5)C(C)(C)C5=C4C=CC=C5)C=C2OC3=CC=C1)C1=CC2=C(C=C1)OC1=CC=CC3=C1B2C1=C(C=C(N2C4=C(C=CC=C4)C(C)(C)C4=C2C=CC=C4)C=C1)O3	C1=CC=C2C(=C1)C3=CC=CC=C3N2C4=CC(=CC=C4)N5C6=CC=CC=C6C7=CC=CC=C75	0.99
CC1=CC2=C(C(C)=C1)N(C1=CC3=C(C=C1)B(C1=C(C(C)C)C=C(C(C)C)C=C1C(C)C)C1=CC=CC=C1O3)C1=C2C=C(C)C=C1C	CC1=CC=CC=C1	0.86
N#CC1=CC2=NC3=C(C4=CC=C(C=C4C5=C3C=CC(N6C7=C(C8(C9=C6C=CC=C9)C%10=C(C%11=C8C=CC=C%11)C=CC=C%10)C=CC=C7)=C5)N%12C%13=C(C%14(C%15=C%12C=CC=C%15)C%16=C(C%17=C%14C=CC=C%17)C=CC=C%16)C=CC=C%13)NC2C=C1C#N	C1=CC=C2C(=C1)C3=CC=CC=C3N2C4=CC=CC(=C4)C5=CC(=CC=C5)N6C7=CC=CC=C7C8=CC=CC=C86	0.948
CC(C1=CC2=C(N(C3=C2C=C(C=C3)C(C)(C)C)C4=C(C(N5C6=C(C7=C5C=CC(C(C)(C)C)=C7)C=C(C=C6)C(C)(C)C)=CC=C4)C8=NC(C9=CC=CC=C9)=NC(C%10=CC=CC=C%10)=N8)C=C1)(C)C	CC1=CC=CC=C1	0.21
CC1=CC=C(S(=O)(=O)C2=CC(N3C4=C(C=CC=C4)C4=C3C=CC=C4)=NC(N3C4=C(C=CC=C4)C4=C3C=CC=C4)=C2)C=C1	C1=CC=C(C=C1)P(=O)(C2=CC=CC=C2)C3=CC4=C(C=C3)OC5=C4C=C(C=C5)P(=O)(C6=CC=CC=C6)C7=CC=CC=C7	0.625
C1=CC=C(C2=CC(C3=CC=C(N4C5=C(C=CC=C5)C5=C4C=CC4=C5OC5=C4C=CC=C5)C=C3)=NC(C3=CC=CC=C3)=N2)C=C1	C1=CC=C(C=C1)P(=O)(C2=CC=CC=C2)C3=CC=CC=C3OC4=CC=CC=C4P(=O)(C5=CC=CC=C5)C6=CC=CC=C6	0.61
CC1(C)C2=CC=CC3=C2B2C4=C(C=CC=C4C(C)(C)C4=C2C1=CC(N1C2=C(C=CC=C2)C(C)(C)C2=C1C=CC=C2)=C4)C3	CC1=CC=CC=C1	0.99
CC(C)(C1=CC2=C(N(C3=C2C=C(C=C3)C(C)(C)C)C4=CC=C(C=C4)S(=O)(C5=CC=C(C=C5)N6C7=C(C8=C6C=CC(C(C)(C)C)=C8)C=C(C=C7)C(C)(C)C)=O)C=C1)C	CC1=CC=CC=C1	0.69
CC(C)(C)C1=CC2=C(C=C1)N(C1=CC=C3C(=O)C4=C(C=C(N5C6=C(C=C(C(C)(C)C)C=C6)C6=C5C=CC(C(C)(C)C)=C6)C=C4)N(C4=CC=CC=C4)C3=C1)C1=C2C=C(C(C)(C)C)C=C1	C1=CC=C(C=C1)P(=O)(C2=CC=CC=C2)C3=CC=CC=C3OC4=CC=CC=C4P(=O)(C5=CC=CC=C5)C6=CC=CC=C6	0.516
CC(C)C1=CC2=C(C=C1)N(C1=CC=C(C3=C(C#N)C(OC4=CC(C5=CC=C(N6C7=C(C=C(C(C)(C)C)C=C7)C7=C6C=CC(C(C)(C)C)=C7)C=C5)=CC=C4)=CC=C3)C=C1)C1=C2C=C(C(C)(C)C)C=C1	C1=CC=C(C=C1)P(=O)(C2=CC=CC=C2)C3=CC4=C(C=C3)OC5=C4C=C(C=C5)P(=O)(C6=CC=CC=C6)C7=CC=CC=C7	0.88
N#CC1=CC=C2C(=C1)C1=C(C=CC(C#N)=C1)C1=C2NC2C=C(N3C4=C(C=CC=C4)C4(C5=C(C=CC=C5)C5=C4C=CC=C5)C4=C3C=CC=C4)C=CC2=N1	CC1=CC=CC=C1	0.668
BrC1=CC(C2=CC=C(N3C4=C(C=CC=C4)OC4=C3C=CC=C4)C=C2)=C2OC3=C(C=CC=C3)B3C4=C(C=CC=C4)OC1=C32	C1=CC=C2C(=C1)C3=CC=CC=C3N2C4=CC(=CC=C4)N5C6=CC=CC=C6C7=CC=CC=C75	0.92
C1=CC2=C(C=C1)N(C1=CC(N3C4=C(C=CC=C4)C4=C3C=CC=C4)=NC=N1)C1=C2C=CC=C1	CC(=C)C(=O)OC	0.21
CC(C)(C)C1=CC(C2=NC(C3=CC(N4C5=C(C=C(C(C)(C)C)C=C5)C5=C4C=CC(C(C)(C)C)=C5)=CC(N4C5=C(C=C(C(C)(C)C)C=C5)C5=C4C=CC(C(C)(C)C)=C5)=C3)=NC(C3=CC(C(C)(C)C)=CC(C(C)(C)C)=C3)=N2)=CC(C(C)(C)C)=C1	CC1=CC=CC=C1	0.59
CC(C)(C1=CC2=C(OC3=CC(N4C5=C(C6=C4C=CC(C(C)(C)C)=C6)C=C(C=C5)C(C)(C)C)=CC7=C3B2C8=C(O7)C=CC(C(C)(C)C)=C8)C=C1)C	CC(C)(C1=CC2=C(OC3=CC(N4C5=C(C6=C4C=CC(C(C)(C)C)=C6)C=C(C=C5)C(C)(C)C)=CC7=C3B2C8=C(O7)C=CC(C(C)(C)C)=C8)C=C1)C	0.411
CC1(C)C2=C(C=CC(N3C4=C(C=C(C5=CC=CC=C5)C=C4)C4=C3C=CC(C3=CC=CC=C3)=C4)=C2)S(=O)(=O)C2=C1C=C(N1C3=C(C=C(C4=CC=CC=C4)C=C3)C3=C1C=CC(C1=CC=CC=C1)=C3)C=C2	C1=CC=C(C=C1)P(=O)(C2=CC=CC=C2)C3=CC=CC=C3OC4=CC=CC=C4P(=O)(C5=CC=CC=C5)C6=CC=CC=C6	0.567
N#CC1=CC2=C3C(=C1)C1=C(C=CC(N4C5=C(C=CC=C5)C5=C4C=CC=C5)=C1)N3C1=C2C=C(N2C3=C(C=CC=C3)C3=C2C=CC=C3)C=C1	C1=CC=C(C=C1)P(=O)(C2=CC=CC=C2)C3=CC=CC=C3OC4=CC=CC=C4P(=O)(C5=CC=CC=C5)C6=CC=CC=C6	0.46
CC(C)(C1=CC=C2OC3=C4B(C5=C(OC4=CC(C3)C6=CC=C(C=C6N7C8=C(C9=C7C=CC=C9)C(OC%10=C%11C=CC=C%10)=C%11C=C8)N%12C%13=C(C%14=C%12C=CC=C%14)C(O%15)=C(C%16=C%15C=CC=C%16)C=C%13)C=CC(C(C)(C)C)=C5)C2=C1)C	CC1=CC=CC=C1	0.442
C1(C2=NC(C3=CC=CC=C3)=NC(C4=CC(C5=CC=CC=C5)=C(C(C6=CC=CC=C6)=C4)N7C8=C(C9=C7C=CC(N%10C%11=C(C%12=C%10C=CC=C%12)C=CC=C%11)=C9)C=CC=C8)=N2)=CC=CC=C1	C1=CC=C(C=C1)P(=O)(C2=CC=CC=C2)C3=CC=CC=C3OC4=CC=CC=C4P(=O)(C5=CC=CC=C5)C6=CC=CC=C6	0.9
C1=CC=C(C2=NC(C3=CC=CC=C3)=NC(C3=CC=C(N4C5=CC=CC=C5C5=C6C(=CC=C54)C4=CC=CC=C4C6(C4=CC=CC=C4)C4=CC=CC=C4)C=C3)=N2)C=C1	C1=CC=C(C=C1)P(=O)(C2=CC=CC=C2)C3=CC=CC=C3OC4=CC=CC=C4P(=O)(C5=CC=CC=C5)C6=CC=CC=C6	0.979
CC1=CC=CC(C)=C1C1=NC(C2=C(C)C=CC=C2C)=NC(C2=C(C)C=C(N3C4=C(C=CC=C4)C(C)(C)C4=C3C=CC=C4)C=C2C)=N1	CC1=CC=CC=C1	0.86
CC(C)(C)C1=CC=C2OC3=C4B(C2=C1)C1=C(C=CC(C(C)(C)C)=C1)OC4=CC(N1C2=C(C=CC=C2)C(C)(C)C2=C1C=CC=C2)=C3	C1=CC=C(C=C1)P(=O)(C2=CC=CC=C2)C3=CC4=C(C=C3)OC5=C4C=C(C=C5)P(=O)(C6=CC=CC=C6)C7=CC=CC=C7	0.93
C1=CC2=C(C=C1)B1C3=C(C=CC=C3)OC3=C(C4=CC=C(N5C6=C(C=CC=C6)SC6=C5C=CC=C6)C=C4)C=CC(=C13)O2	CC1=CC=CC=C1	0.63
C1=CC=C(C2=CC3=C(C=C2)N(C2=CC4=C(C=C2)N(C2=CC=C(C5=NC(C6=CC=CC=C6)=NC(C6=CC=CC=C6)=N5)C=C2)C2=C4C=C(N4C5=C(C=C(C6=CC=CC=C6)C=C5)C5=C4C=CC(C4=CC=CC=C4)=C5)C=C2)C2=C3C=C(C3=CC=CC=C3)C=C2)C=C1	CC1=CC=CC=C1	0.74
COC1=CC2=C(C=C1)N(C1=NC=NC(N3C4=C(C=C(OC)C=C4)C4=C3C=CC(OC)=C4)=C1C#N)C1=C2C=C(OC)C=C1	COC1=CC2=C(C=C1)N(C1=NC=NC(N3C4=C(C=C(OC)C=C4)C4=C3C=CC(OC)=C4)=C1C#N)C1=C2C=C(OC)C=C1	0.02
N#CC1=C(C2=CC=CC=C2)C(C#N)=C(N2C3=C(C=CC=C3)C3=C2C=CC=C3)N=C1N1C2=C(C=CC=C2)C2=C1C=CC=C2	CC1=CC=CC=C1	0.497
CC1=CC(C)=C(B(C2=C(C)C=C(C)C=C2C)C2=C(C)C=C(N3C4=C(C=CC=C4)C(C)(C)C4=C3C=CC=C4)C=C2C)C(C)=C1	C1=CC=C(C=C1)P(=O)(C2=CC=CC=C2)C3=CC=CC=C3OC4=CC=CC=C4P(=O)(C5=CC=CC=C5)C6=CC=CC=C6	0.89
C1=CC2=C(C=C1)B1C3=C(C=CC=C3)OC3=C(C4=CC=C(N5C6=C(C=CC=C6)OC6=C5C=CC=C6)C=C4)C=CC(=C13)O2	C1=CC=C2C(=C1)C3=CC=CC=C3N2C4=CC(=CC=C4)N5C6=CC=CC=C6C7=CC=CC=C75	0.84
CC1(C)C2=C(C=CC=C2)N(C2=CC3=C(C=C2)S(=O)(=O)C2=CC=CC=C2N3C2=CC=CC=C2)C2=C1C=CC=C2	C1=CC=C(C=C1)P(=O)(C2=CC=CC=C2)C3=CC=CC=C3OC4=CC=CC=C4P(=O)(C5=CC=CC=C5)C6=CC=CC=C6	0.62
CC1C2=CC=CC3=C2B2C4=C(C=CC=C4C(C)C4=C2C1=CC(N1C2=CC=CC=C2C2(C5=C(C=CC=C5)C5=C2C=CC=C5)C2=C1C=CC=C2)=C4)C3	C1=CC=C2C(=C1)C3=CC=CC=C3N2C4=CC(=CC=C4)N5C6=CC=CC=C6C7=CC=CC=C75	0.9
C1=CC=C(C2=NC(C3=CC=CC=C3)=NC(C3=CC=C(N4C5=CC=CC=C5C5=CC6=C(C=C54)C4(C5=CC=CC=C5C5=CC=CC=C54)C4=CC=CC=C46)C=C3)=N2)C=C1	C1=CC=C(C=C1)P(=O)(C2=CC=CC=C2)C3=CC=CC=C3OC4=CC=CC=C4P(=O)(C5=CC=CC=C5)C6=CC=CC=C6	0.856
C1(C2=CC3=C(N=C4OC(C5=CC=CC=C5)=CC4=N3)C=C2)=CC=CC=C1	C(Cl)Cl	0.589
O=S(=O)(C1=CC=C(N(C2=CC=CC=C2)C2=CC=CC=C2)C=C1)C1=CC=C(S(=O)(=O)C2=CC=C(N(C3=CC=CC=C3)C3=CC=CC=C3)C=C2)C=C1	CC1=CC=CC=C1	0.64
CC1=C(C=CC(N2C3=C(C(C)(C4=C2C=CC=C4)C)C=CC=C3)=C1)C5=NN(N=C5C6=CC=C(C=C6C)N7C8=C(C(C)(C9=C7C=CC=C9)C)C=CC=C8)C%10=CC=C(C=C%10)C#N	C1=CC=C(C=C1)P(=O)(C2=CC=CC=C2)C3=CC=CC=C3OC4=CC=CC=C4P(=O)(C5=CC=CC=C5)C6=CC=CC=C6	0.59
N#CC1=CC(C#N)=C(N2C3=C(C=CC=C3)C3=C2C=CC=C3)C=C1N1C2=C(C=CC=C2)C2=C1C=CC=C2	CC1=CC=CC=C1	0.35
O=S(=O)(C1=CC=CC=C1)C1=CC=C(N2C3=C(C=CC=C3)C3=C2C=CC=C3)C=N1	C1CCCCC1	0.3
CC1(C)C2=C(C=CC=C2)N(C2=CC3=C(C=C2)C2=NC4=CC=CC(F)=C4N=C2C2=C3C=C(N3C4=C(C=CC=C4)C(C)(C)C4=C3C=CC=C4)C=C2)C2=C1C=CC=C2	CC1=CC=CC=C1	0.3
CC(C)(C1=CC2=C(N(C3=C(C2(C)C)C=C(C=C3)C(C)(C)C)C4=CC=C(C=C4)C5=NN(N=C5C(C=C6)=CC=C6N7C8=C(C(C)(C9=C7C=CC(C(C)(C)C)=C9)C)C=C(C=C8)C(C)(C)C)C%10=CC=C(C=C%10)C#N)C=C1)C	C1=CC=C(C=C1)P(=O)(C2=CC=CC=C2)C3=CC=CC=C3OC4=CC=CC=C4P(=O)(C5=CC=CC=C5)C6=CC=CC=C6	0.78
CC(C)(C1=CC2=C(N(C3=CC=C(C=C3C(F)(F)F)C4=NC(C5=CC=CC=C5)=NC(C6=CC=CC=C6)=N4)C7=C2C=C(C=C7)C(C)(C)C)C=C1)C	C1=CC=C2C(=C1)C3=CC=CC=C3N2C4=CC(=CC=C4)N5C6=CC=CC=C6C7=CC=CC=C75	0.72
CC1(C)C2=C(C3=C(C=C2)N(C2=CC=CC=C2)C2=C3C=CC=C2)N(C2=NC(C3C=CC=CC3)=NC(C3=CC=CC=C3)N2)C2=C1CCC=C2	CC1(C)C2=C(C3=C(C=C2)N(C2=CC=CC=C2)C2=C3C=CC=C2)N(C2=NC(C3C=CC=CC3)=NC(C3=CC=CC=C3)N2)C2=C1CCC=C2	0.32
CC(C)C1=CC(N2C3=CC=CC=C3C3(C4=C(C=CC=C4)C4=C3C=CC=C4)C3=C2C=CC=C3)=CC(C(C)C)=C1B1C2=C(C=CC=C2)C2(C3=C1C=CC=C3)C1=C(C=CC=C1)C1=C2C=CC=C1	C1=CC=C2C(=C1)C3=CC=CC=C3N2C4=CC(=CC=C4)N5C6=CC=CC=C6C7=CC=CC=C75	0.96
F[B-]12OC3=CC=C(N4C5=C(C=CC=C5)C6=C4C=CC=C6)C=C3C7=CC=CC(C8=C(C=CC(N9C%10=C(C=CC=C%10)C%11=C9C=CC=C%11)=C8)O2)=[N+]71	C1=CC=C(C=C1)P(=O)(C2=CC=CC=C2)C3=CC=C(C=C3)C(C4=CC=C(C=C4)P(=O)(C5=CC=CC=C5)C6=CC=CC=C6)(C(F)(F)F)C(F)(F)F	0.55
C1=CC=C(N2C3=CC=CC=C3C3=C2C2=C(C4=C3N(C3=CC=CC=C3)C3=C4C=CC=C3)N(C3=CC4=C5B(C6=C(C=CC=C6)OC5=C3)C3=C(C=CC=C3)O4)C3=C2C=CC=C3)C=C1	C1=CC=C2C(=C1)C3=CC=CC=C3N2C4=CC=CC(=C4)C5=CC(=CC(=C5)C#N)N6C7=CC=CC=C7C8=CC=CC=C86	0.953
CC(C)C1=CC(N2C3=CC=CC=C3C3(C4=C(C=CC=C4)C4=C3C=CC=C4)C3=C2C=CC=C3)=CC(C(C)C)=C1B1C2=C(C=CC=C2)C2(C3=C1C=CC=C3)C1=C(C=CC=C1)C1=C2C=CC=C1	C1=CC=C2C(=C1)C3=CC=CC=C3N2C4=CC(=CC=C4)N5C6=CC=CC=C6C7=CC=CC=C75	0.91
C1(C2=NC(C3=CC=CC=C3)=NC(C4=CC=C(C=C4)N5C6=CC=CC=C6C(C7=CC8=C(N(C9=C8C=CC=C9)C%10=CC=CC=C%10)C=C7)(C%11=CC=CC=C%115)C%12=CC=CC=C%12)=N2)=CC=CC=C1	C1=CC(C2=NC(C3=CC=CC(N4C5=C(C=CC=C5)C5=C4C=CC=C5)=C3)=CC=C2)=CC(N2C3=C(C=CC=C3)C3=C2C=CC=C3)=C1	0.99
C1=CC=C(N2C3=C(C=CC=C3)C3=C2C2=C(OC4=C2C=CC=C4)C2=C3N(C3=CC4=C5B(C6=C(C=CC=C6)OC5=C3)C3=C(C=CC=C3)O4)C3=C2C=CC=C3)C=C1	C1=CC=C(C=C1)P(=O)(C2=CC=CC=C2)C3=CC4=C(C=C3)OC5=C4C=C(C=C5)P(=O)(C6=CC=CC=C6)C7=CC=CC=C7	0.969
CC1=CC=C(C(=O)C2=CC(C3=CC=C(N4C5=C(C=CC=C5)OC5=C4C=CC=C5)C=C3)=C(C(=O)C3=CC=C(C)C=C3)C=C2C2=CC=C(N3C4=C(C=CC=C4)OC4=C3C=CC=C4)C=C2)C=C1	C1=CC=C2C(=C1)C3=CC=CC=C3N2C4=CC=CC(=C4)C5=CC(=CC=C5)N6C7=CC=CC=C7C8=CC=CC=C86	0.57
O=C(C1=CC=C(C=C1N2C3=CC=CC=C3)N4C5=C(C(C)(C6=C4C=CC=C6)C)C=CC=C5)C(C=C7)=C2C=C7N8C9=CC=CC=C9C(C)(C)C%10=CC=CC=C8%10	C1=CC=C(C=C1)P(=O)(C2=CC=CC=C2)C3=CC=CC=C3OC4=CC=CC=C4P(=O)(C5=CC=CC=C5)C6=CC=CC=C6	0.811
CC1=CC2=C(C(C)=C1)N(C1=CC3=C(C=C1)S(=O)(=O)C1=C(C=C(N4C5=C(C=C(C)C=C5C)C5=C4C(C)=CC(C)=C5)C=C1)C3(C)C)C1=C2C=C(C)C=C1C	C1=CC=C(C=C1)P(=O)(C2=CC=CC=C2)C3=CC=CC=C3OC4=CC=CC=C4P(=O)(C5=CC=CC=C5)C6=CC=CC=C6	0.577
CC1=CC(C)=C(C(C)=C1)B(C2=C(C)C=C(C=C2C)C)C3=CC(N4C5=CC=CC=C5SC6=C4C=CC=C6)=CC(C(C)(C)C)=C3	CC1=CC=CC=C1	0.505
C1(C2=NC(C3=CC=CC=C3)=NC(C4=CC=CC=C4)=N2)=CC(C5=CC=CC=C5)=C(N6C7=CC=C(N8C9=C(C%10=C8C=CC=C%10)C=CC=C9)C=C7C%11=C6C=CC=C%11)C=C1	C1=CC=C2C(=C1)C3=CC=CC=C3N2C4=CC=CC(=C4)C5=CC=CC(=C5N6C7=CC=CC=C7C8=CC=CC=C86)C#N	0.728
CC(C)(C)C1=CC2=C(C=C1)OC1=CC(N3C4=CC=C(C5=CC=C6C(=C5)C5=C(C=CC=C5)N6C5=CC=CC=C5)C=C4C4=C3C=CC(C3=CC5=C(C=C3)N(C3=CC=CC=C3)C3=CC=CC=C35)=C4)=CC3=C1B2C1=C(C=CC(C(C)(C)C)=C1)O3	C1=CC=C(C=C1)P(=O)(C2=CC=CC=C2)C3=CC4=C(C=C3)OC5=C4C=C(C=C5)P(=O)(C6=CC=CC=C6)C7=CC=CC=C7	0.878
C12=CC=CC=C1OC3=C4B2C5=C(OC4=CC(N6C(C=CC=C7)=C7C8(C9=C(C%10(C%11=C8C=CC=C%11)C%12=C(C%13=C%10C=CC=C%13)C=CC=C%12)C=CC=C9)C%14=CC=CC=C6%14)=C3)C=CC=C5	C1=CC=C(C=C1)P(=O)(C2=CC=CC=C2)C3=CC=CC=C3OC4=CC=CC=C4P(=O)(C5=CC=CC=C5)C6=CC=CC=C6	0.97
O=S(C(C=C1)=CC=C1N2C(C=CC=C3)=C3C(C=C4)=C2C5=C4C(C=CC=C6)=C6N5C7=CC=CC=C7)(C8=CC=CC=C8)=O	O=S(C(C=C1)=CC=C1N2C(C=CC=C3)=C3C(C=C4)=C2C5=C4C(C=CC=C6)=C6N5C7=CC=CC=C7)(C8=CC=CC=C8)=O	0.53
F[B-]1(OC2=CC=CC=C2C3=CC(C4=C(C=C(C=C4C)N5C6=C(C7=C5C=CC(C8=CC=CC=C8)=C7)C=C(C=C6)C9=CC=CC=C9)C)=CC=[N+]31)F	CC1=CC=CC=C1	0.99
C1(C2=CC(N=C3OC(C4=CC=CC=C4)=CC3=N5)=C5C=C2)=CC=CC=C1	C(Cl)Cl	0.487

## Sheet: FWHM
73 FWHM values as the training set and 18 ones as the
independent testing set for the transfer learning on the blue OLED emitters
Emitters	Solvents	Labels(nm)
The training set
C1(C2=CC3=NC4=C(C5=C(C6=C4C=CC=C6)C=CC=C5)N=C3O2)=CC=CC=C1	C(Cl)Cl	36
C1(C2=CC3=NC4=C(C5=C(C6=C4C=CC=N6)N=CC=C5)N=C3O2)=CC=CC=C1	C(Cl)Cl	40
F[B-]1(OC2=CC=CC=C2C3=CC(C4=C(C=C(C=C4C)N5C6=C(C7=C5C=CC=C7)C=CC=C6)C)=CC=[N+]31)F	C1=CC=C(C=C1)P(=O)(C2=CC=CC=C2)C3=CC=CC=C3OC4=CC=CC=C4P(=O)(C5=CC=CC=C5)C6=CC=CC=C6	78
C1(C2=NC(C3=CC=CC=C3)=NC(C4=CC=CC=C4)=N2)=CC(C5=CC=CC=C5)=C(N6C7=CC=C(N8C9=C(C%10=C8C=CC=C%10)C=CC=C9)C=C7C%11=C6C=CC=C%11)C=C1	C1=CC=C(C=C1)P(=O)(C2=CC=CC=C2)C3=CC=CC=C3OC4=CC=CC=C4P(=O)(C5=CC=CC=C5)C6=CC=CC=C6	88
C1=CC2=C(C=C1)N(C1=CC(C3=CC(N4C5=C(C=CC=C5)C5=C4C=CC=C5)=NC(N4C5=C(C=CC=C5)C5=C4C=CC=C5)=C3)=CC(N3C4=C(C=CC=C4)C4=C3C=CC=C4)=N1)C1=C2C=CC=C1	C1=CC=C(C=C1)P(=O)(C2=CC=CC=C2)C3=CC4=C(C=C3)SC5=C4C=C(C=C5)P(=O)(C6=CC=CC=C6)C7=CC=CC=C7	66
CC1=CC2=C(C=C1)N(C3=C2C=C(C)C=C3)C4=NC(N5C6=C(C7=C5C=CC(C)=C7)C=C(C)C=C6)=CC(C8=CC(N9C%10=C(C%11=C9C=CC(C)=C%11)C=C(C)C=C%10)=NC(N(C%12=C%13C=C(C)C=C%12)C%14=C%13C=C(C)C=C%14)=C8)=C4	C1=CC=C(C=C1)P(=O)(C2=CC=CC=C2)C3=CC4=C(C=C3)SC5=C4C=C(C=C5)P(=O)(C6=CC=CC=C6)C7=CC=CC=C7	70
C12=C(N(C3=C2C=CC=C3)C4=CC(C5=CC(N6C7=C(C8=C6C=CC=C8)C=CC=C7)=NC(N9C%10=C(C%11=C9C=CC=C%11)C=CC=C%10)=N5)=NC(N%12C%13=C(C%14=C%12C=CC=C%14)C=CC=C%13)=N4)C=CC=C1	C1=CC=C(C=C1)P(=O)(C2=CC=CC=C2)C3=CC4=C(C=C3)SC5=C4C=C(C=C5)P(=O)(C6=CC=CC=C6)C7=CC=CC=C7	77
C1(C2=NC(C3=CC=CC=C3)=NC(C4=CC=CC=C4)=N2)=CC(C5=CC=CC=C5)=C(N6C7=CC=C(N8C9=C(C%10=C8C=CC=C%10)C=CC=C9)C=C7C%11=C6C=CC=C%11)C=C1	C1=CC=C2C(=C1)C3=CC=CC=C3N2C4=C(C=CC=C4C5=CC6=C(C=C5)OC7=CC=CC=C76)C#N	88
CC1=CC(C)=CC(C)=C1C2=CC3=C(N4C5=C(C6=C4C3=CC(C7=C(C=C(C=C7C)C)C)=C6)C=C8C(C9=C%10C(C%11=C(N8%10)C=CC(C%12=C(C=C(C=C%12C)C)C)=C%11)=CC(C%13=C(C=C(C=C%13C)C)C)=C9)=C5)C=C2	C1=CC=C2C(=C1)C3=CC=CC=C3N2C4=CC(=CC=C4)N5C6=CC=CC=C6C7=CC=CC=C75	22
CC(C)C1=CC(N2C3=CC=CC=C3C3(C4=C(C=CC=C4)C4=C3C=CC=C4)C3=C2C=CC=C3)=CC(C(C)C)=C1B1C2=C(C=CC=C2)C2(C3=C1C=CC=C3)C1=C(C=CC=C1)C1=C2C=CC=C1	C1=CC=C2C(=C1)C3=CC=CC=C3N2C4=CC(=CC=C4)N5C6=CC=CC=C6C7=CC=CC=C75	54
CC(C)C1=CC(N2C3=CC=CC=C3C3(C4=C(C=CC=C4)C4=C3C=CC=C4)C3=C2C=CC=C3)=CC(C(C)C)=C1B1C2=C(C=CC=C2)C2(C3=C1C=CC=C3)C1=C(C=CC=C1)C1=C2C=CC=C1	C1=CC=C2C(=C1)C3=CC=CC=C3N2C4=CC(=CC=C4)N5C6=CC=CC=C6C7=CC=CC=C75	55
CC1C2=CC=CC3=C2B2C4=C(C=CC=C4C(C)C4=C2C1=CC(N1C2=CC=CC=C2C2(C5=C(C=CC=C5)C5=C2C=CC=C5)C2=C1C=CC=C2)=C4)C3	C1=CC=C2C(=C1)C3=CC=CC=C3N2C4=CC(=CC=C4)N5C6=CC=CC=C6C7=CC=CC=C75	57
C1(C2=NC(C3=CC=CC=C3)=NC(C4=CC=CC=C4)=N2)=CC(C5=CC=CC=C5)=C(N6C7=CC=C(N8C9=C(C%10=C8C=CC=C%10)C=CC=C9)C=C7C%11=C6C=CC=C%11)C=C1	C1=CC=C2C(=C1)C3=CC=CC=C3N2C4=CC=CC(=C4)C5=CC(=CC(=C5)C#N)N6C7=CC=CC=C7C8=CC=CC=C86	79
C1(C2=NC(C3=CC=CC=C3)=NC(C4=CC=CC=C4)=N2)=CC(C5=CC=CC=C5)=C(N6C7=CC=C(N8C9=C(C%10=C8C=CC=C%10)C=CC=C9)C=C7C%11=C6C=CC=C%11)C=C1	C1=CC=C2C(=C1)C3=CC=CC=C3N2C4=CC=CC(=C4)C5=CC(=CC=C5)N6C7=CC=CC=C7C8=CC=CC=C86	80
N(C1=CC=CC=C1)(C2=CC=CC=C2)C3=CC4=C5B(C6=C(N(C7=CC=CC=C7)C5=C3)C=CC=C6)C8=CC9=C(OC%10=C%11B9C%12=C(N(C%13=CC=CC=C%13)C%11=CC(N(C%14=CC=CC=C%14)C%15=CC=CC=C%15)=C%10)C=CC=C%12)C=C8O4	C1=CC=C2C(=C1)C3=CC=CC=C3N2C4=CC=CC(=C4)C5=CC(=CC=C5)N6C7=CC=CC=C7C8=CC=CC=C86	18
N(C1=CC=CC=C1)(C2=CC3=C4B(C5=CC6=C(C=C5S3)SC7=C8B6C9=C(C=CC=C9)N(C8=CC(N(C%10=CC=CC=C%10)C%11=CC=CC=C%11)=C7)C%12=CC=CC=C%12)C%13=C(C=CC=C%13)N(C4=C2)C%14=CC=CC=C%14)C%15=CC=CC=C%15	C1=CC=C2C(=C1)C3=CC=CC=C3N2C4=CC=CC(=C4)C5=CC(=CC=C5)N6C7=CC=CC=C7C8=CC=CC=C86	22
C1(C2=NC(C3=CC=CC=C3)=NC(C4=CC=CC=C4)=N2)=CC(C5=CC=CC=C5)=C(N6C7=CC=C(N8C9=C(C%10=C8C=CC=C%10)C=CC=C9)C=C7C%11=C6C=CC=C%11)C=C1	C1=CC=C2C(=C1)C3=CC=CC=C3N2C4=CC=CC(=C4)C5=CC=CC(=C5N6C7=CC=CC=C7C8=CC=CC=C86)C#N	87
C1=CC=C(N(C2=CC=CC=C2)C2=CC3=C4B(C5=CC=CC=C5N3C3=CC=CC=C3)C3=C(C=CC=C3)N(C3=CC=CC=C3)C4=C2)C=C1	C1CCCCC1	16
CC(C)(C)C1=CC=C(N2C3=CC(N(C4=CC=CC=C4)C4=CC=CC=C4)=CC4=C3B(C3=CC(C(C)(C)C)=CC=C3N4C3=CC=C(C(C)(C)C)C=C3)C3=C2C=CC(C(C)(C)C)=C3)C=C1	C1CCCCC1	18
CC(C)(C)C1=CC=C2OC3=C4B(C2=C1)C1=C(C=CC(C(C)(C)C)=C1)OC4=CC(C1=C(N2C4=C(C=CC=C4)C4=C2C=CC=C4)C=C(N2C4=C(C=CC=C4)C4=C2C=CC=C4)C=C1)C3	CC(C)(C)C1=CC=C2OC3=C4B(C2=C1)C1=C(C=CC(C(C)(C)C)=C1)OC4=CC(C1=C(N2C4=C(C=CC=C4)C4=C2C=CC=C4)C=C(N2C4=C(C=CC=C4)C4=C2C=CC=C4)C=C1)C3	37
CC(C)(C1=CC=C2OC3=C4B(C5=C(OC4=CC(C3)C6=CC=C(C=C6N7C8=C(C9=C7C=CC=C9)C(C%10=C%11C=CC=C%10)=C(C%11(C)C)C=C8)N%12C%13=C(C%14=C%12C=CC=C%14)C=C(C%15=C(C%16(C)C)C=CC=C%15)C%16=C%13)C=CC(C(C)(C)C)=C5)C2=C1)C	CC(C)(C1=CC=C2OC3=C4B(C5=C(OC4=CC(C3)C6=CC=C(C=C6N7C8=C(C9=C7C=CC=C9)C(C%10=C%11C=CC=C%10)=C(C%11(C)C)C=C8)N%12C%13=C(C%14=C%12C=CC=C%14)C=C(C%15=C(C%16(C)C)C=CC=C%15)C%16=C%13)C=CC(C(C)(C)C)=C5)C2=C1)C	53
CC(C)(C1=CC=C2OC3=C4B(C5=C(OC4=CC(C3)C6=CC=C(C=C6N7C8=C(C9=C7C=CC=C9)C(OC%10=C%11C=CC=C%10)=C%11C=C8)N%12C%13=C(C%14=C%12C=CC=C%14)C(O%15)=C(C%16=C%15C=CC=C%16)C=C%13)C=CC(C(C)(C)C)=C5)C2=C1)C	CC(C)(C1=CC=C2OC3=C4B(C5=C(OC4=CC(C3)C6=CC=C(C=C6N7C8=C(C9=C7C=CC=C9)C(OC%10=C%11C=CC=C%10)=C%11C=C8)N%12C%13=C(C%14=C%12C=CC=C%14)C(O%15)=C(C%16=C%15C=CC=C%16)C=C%13)C=CC(C(C)(C)C)=C5)C2=C1)C	51
CC(C)C1=CC(N2C3=CC=CC=C3C3(C4=C(C=CC=C4)C4=C3C=CC=C4)C3=C2C=CC=C3)=CC(C(C)C)=C1B1C2=C(C=CC=C2)C2(C3=C1C=CC=C3)C1=C(C=CC=C1)C1=C2C=CC=C1	CC(C)C1=CC(N2C3=CC=CC=C3C3(C4=C(C=CC=C4)C4=C3C=CC=C4)C3=C2C=CC=C3)=CC(C(C)C)=C1B1C2=C(C=CC=C2)C2(C3=C1C=CC=C3)C1=C(C=CC=C1)C1=C2C=CC=C1	48
CC1(C)C2=C(C=CC=C2)N(C2=CC3=C(C=C2)C2=C(C=C(N4C5=C(C=CC=C5)C(C)(C)C5=C4C=CC=C5)C=C2)C32C3=CC=CC=C3S(=O)(=O)C3=C2C=CC=C3)C2=C1C=CC=C2	CC1(C)C2=C(C=CC=C2)N(C2=CC3=C(C=C2)C2=C(C=C(N4C5=C(C=CC=C5)C(C)(C)C5=C4C=CC=C5)C=C2)C32C3=CC=CC=C3S(=O)(=O)C3=C2C=CC=C3)C2=C1C=CC=C2	54
CC1=CC(C)=CC(C)=C1C2=CC3=C(N4C5=C(C6=C4C3=CC(C7=C(C=C(C=C7C)C)C)=C6)C=C8C(C9=C%10C(C%11=C(N8%10)C=CC(C%12=C(C=C(C=C%12C)C)C)=C%11)=CC(C%13=C(C=C(C=C%13C)C)C)=C9)=C5)C=C2	CC1=CC=CC=C1	17
CC(C)(C)C1=CC=C(N2C3=CC(N4C5=C(C=CC=C5)C(C5=CC=CC=C5)(C5=CC=CC=C5)C5=C4C=CC=C5)=CC4=C3B(C3=CC(C(C)(C)C)=CC=C3N4C3=CC=C(C(C)(C)C)C=C3)C3=C2C=CC(C(C)(C)C)=C3)C=C1	CC1=CC=CC=C1	19
C1=CC2=C(C=C1)N1C3=C(C=CC=C3)C3=C1C2=CC=C3	CC1=CC=CC=C1	21
CC1=CC(C)=C(C2=CC3=C(C=C2)N2C4=C(C=C(C5=C(C)C=C(C)C=C5C)C=C4)C4=C2C3=CC(C2=C(C)C=C(C)C=C2C)=C4)C(C)=C1	CC1=CC=CC=C1	21
N(C1=CC=CC=C1)(C2=CC3=C4B(C5=CC6=C(C=C5S3)OC7=C8B6C9=C(C=CC=C9)N(C8=CC(N(C%10=CC=CC=C%10)C%11=CC=CC=C%11)=C7)C%12=CC=CC=C%12)C%13=C(C=CC=C%13)N(C4=C2)C%14=CC=CC=C%14)C%15=CC=CC=C%15	CC1=CC=CC=C1	21
C1(N(C2=CC3=C4B(C5=CC=CC6=C5N(C7=C6C=CC=C7)C4=C2)C8=CC=CC=C8N3C9=CC=CC=C9)C%10=CC=CC=C%10)=CC=CC=C1	CC1=CC=CC=C1	22
C1=CC=C(N2C3=CC=CC=C3B3C4=CC=CC5=C4N(C4=CC=CC2=C34)C2=C5C=CC=C2)C=C1	CC1=CC=CC=C1	23
CC(C)(C)C1=CC=C2OC3=C4B(C2=C1)C1=C(C=CC(C(C)(C)C)=C1)OC4=CC(C1=C(N2C4=C(C=CC=C4)C4=C2C=CC=C4)C=C(N2C4=C(C=CC=C4)C4=C2C=CC=C4)C=C1)C3	CC1=CC=CC=C1	25
CC(C)(C)C1=CC=C(N(C2=CC=C(C(C)(C)C)C=C2)C2=CC3=C4B(C5=CC(C(C)(C)C)=CC=C5N3C3=CC=C(C(C)(C)C)C=C3)C3=CC=CC5=C3N(C4=C2)C2=C(C=CC=C2)C5(C)C)C=C1	CC1=CC=CC=C1	26
CC(C)(C)C1=CC2=C3B(C4=C(C=CC=C4)O2)C2=C4C(=CC=C2)C2=CC=CC=C2N4C3=C1	CC1=CC=CC=C1	27
CC(C)(C)C1=CC2=C3B(C4=C(C=CC=C4)O2)C2=C(C=CC=C2)N(C2=CC=CC=C2)C3=C1	CC1=CC=CC=C1	28
O=C1C2=CC=CC=C2N2C3=C(C=CC=C13)C(=O)C1=C2C(C2=CC=C(N3C4=CC=CC=C4C4=C3C=CC=C4)C=C2)=CC=C1	CC1=CC=CC=C1	29
CC(C)(C)C1=CC2=C(C=C1)N1C3=C(C=C(C(C)(C)C)C=C23)C(=O)C2=CC=CC(N3C4=C(C=CC=C4)C4=C3C=CC=C4)=C21	CC1=CC=CC=C1	36
CC(C)(C)C1=CC2=C3B(C4=C(C=CC=C4)O2)C2=C4C(=CC=C2)C(C)(C)C2=CC=CC=C2N4C3=C1	CC1=CC=CC=C1	38
CC(C)(C)C1=CC2=C3B(C4=C(C=CC=C4)O2)C2=C4C(=CC=C2)C(C2=CC=CC=C2)(C2C=CC=CC2)C2=CC=CC=C2N4C3=C1	CC1=CC=CC=C1	38
CC1=CC(C)=C(B(C2=CC3=C(C=C2)N2C4=C(C=CC=C4)C(C)(C)C4=C2C(=CC=C4)C3(C2=CC=CC=C2)C2=CC=CC=C2)C2=C(C)C=C(C)C=C2C)C(C)=C1	CC1=CC=CC=C1	44
CC(C)(C1=CC2=C(OC3=CC(N4C5=C(C6=C4C=CC(C(C)(C)C)=C6)C=C(C=C5)C(C)(C)C)=CC7=C3B2C8=C(O7)C=CC(C(C)(C)C)=C8)C=C1)C	CC1=CC=CC=C1	44.9
CC(C)(C1=CC2=C(OC3=CC(N4C5=C(C6=C4C=CC(C(C)(C)C)=C6)C=C(C=C5)C(C)(C)C)=CC7=C3B2C8=C(O7)C=CC(C(C)(C)C)=C8)C=C1)C	CC1=CC=CC=C1	44.9
CC(C)(C1=CC2=C(OC3=CC(N4C5=C(C6=C4C=CC(C7=CC=C(C(C)(C)C)C=C7)=C6)C=C(C8=CC=C(C(C)(C)C)C=C8)C=C5)=CC9=C3B2C%10=C(O9)C=CC(C(C)(C)C)=C%10)C=C1)C	CC1=CC=CC=C1	46.3
CC(C)(C)C1=CC=C(C2=CC3=C(C=C2)N(C2=CC4=C5B(C6=C(C=CC(C(C)(C)C)=C6)OC5=C2)C2=C(C=CC(C(C)(C)C)=C2)O4)C2=C3C=C(C3=CC=C(C(C)(C)C)C=C3)C=C2)C=C1	CC1=CC=CC=C1	46.3
CC(C)(C)C1=CC2=C(C=C1)OC1=CC(N3C4=C(C=CC=C4)C4(C5=C(C=CC=C5)C5=C4C=CC=C5)C4=C3C=CC=C4)=CC3=C1B2C1=C(C=CC(C(C)(C)C)=C1)O3	CC1=CC=CC=C1	47
CC1=CC(C)=C(B(C2=CC3=C(C=C2)N2C4=C(C=CC=C4)OC4=C2C(=CC=C4)C3(C2=CC=CC=C2)C2=CC=CC=C2)C2=C(C)C=C(C)C=C2C)C(C)=C1	CC1=CC=CC=C1	48
FC(F)(F)C1=CC(C2=CC=C(N3C4=C(C=CC=C4)C4=C3C=CC=C4)C=C2)=CC(C(F)(F)F)=C1	CC1=CC=CC=C1	49
CC(C)(C1=CC=C2OC3=C4B(C5=C(OC4=CC(C3)C6=CC=C(C=C6N7C8=C(C9=C7C=CC=C9)C(C%10=C%11C=CC=C%10)=C(C%11(C)C)C=C8)N%12C%13=C(C%14=C%12C=CC=C%14)C=C(C%15=C(C%16(C)C)C=CC=C%15)C%16=C%13)C=CC(C(C)(C)C)=C5)C2=C1)C	CC1=CC=CC=C1	49
CC(C)(C)C1=CC=C2OC3=C4B(C2=C1)C1=C(C=CC(C(C)(C)C)=C1)OC4=CC(N1C2=C(C=CC=C2)C(C)(C)C2=C1C=CC=C2)=C3	CC1=CC=CC=C1	50
CC1(C)C2=C(C=CC(N3C4=C(C=CC=C4)C4=C3C=CC=C4)=C2)S(=O)(=O)C2=C1C=C(N1C3=C(C=CC=C3)C3=C1C=CC=C3)C=C2	CC1=CC=CC=C1	52
CC1C2=CC=CC3=C2B2C4=C(C=CC=C4C(C)C4=C2C1=CC(N1C2=CC=CC=C2C2(C5=C(C=CC=C5)C5=C2C=CC=C5)C2=C1C=CC=C2)=C4)C3	CC1=CC=CC=C1	54
CC(C)(C)C1=CC=C2OC3=CC(N4C5=C(C=CC=C5)C5=C4C4=C(C6=C5N(C5=CC=CC=C5)C5=C6C=CC=C5)N(C5=CC=CC=C5)C5=C4C=CC=C5)=CC4=C3B(C2=C1)C1=CC(C(C)(C)C)=CC=C1O4	CC1=CC=CC=C1	55
CC1(C)C2=C(C=CC(N3C4=C(C=C(C5=CC=CC=C5)C=C4)C4=C3C=CC(C3=CC=CC=C3)=C4)=C2)S(=O)(=O)C2=C1C=C(N1C3=C(C=C(C4=CC=CC=C4)C=C3)C3=C1C=CC(C1=CC=CC=C1)=C3)C=C2	CC1=CC=CC=C1	55
FC(F)(F)C1=NC=C(C2=CC=C(N3C4=C(C=CC=C4)C4=C3C=CC=C4)C=C2)C=N1	CC1=CC=CC=C1	56
CC(C)(C1=CC2=C(N3C4=C(C(C5=CC=CC(N(C6=CC=CC=C6)C7=CC=CC=C7)=C53)=O)C=C(C=C24)C(C)(C)C)C=C1)C	CC1=CC=CC=C1	57
FC(F)(F)C1=NC(C(F)(F)F)=C(C2=CC=C(N3C4=C(C=CC=C4)C4=C3C=CC=C4)C=C2)C=C1	CC1=CC=CC=C1	57
FC(F)(F)C1=CC(C2=CC=C(N3C4=C(C=CC=C4)C4=C3C=CC=C4)C=C2)=CC(C(F)(F)F)=N1	CC1=CC=CC=C1	59
F[B-]1(OC2=CC=CC=C2C3=CC(C4=C(C=C(C=C4C)N5C6=C(C7=C5C=CC(C8=CC=CC=C8)=C7)C=C(C=C6)C9=CC=CC=C9)C)=CC=[N+]31)F	CC1=CC=CC=C1	62
CC(C)(C)C1=CC2=C(C=C1)N(C1=CC(N3C4=C(C=C(C(C)(C)C)C=C4)C4=C3C=CC(C(C)(C)C)=C4)=C(N3C4=C(C=CC=C4)C4=C3C=CC=C4)C(C#N)=C1N1C3=C(C=CC=C3)C3=C1C=CC=C3)C1=C2C=C(C(C)(C)C)C=C1	CC1=CC=CC=C1	64
N#CC1=C(N2C3=C(C=CC=C3)C3=C2C=CC=C3)C(N2C3=C(C=C(C4=CC=CC=C4)C=C3)C3=C2C=CC(C2=CC=CC=C2)=C3)=CC(N2C3=C(C=C(C4=CC=CC=C4)C=C3)C3=C2C=CC(C2=CC=CC=C2)=C3)=C1N1C2=C(C=CC=C2)C2=C1C=CC=C2	CC1=CC=CC=C1	64
CC1=CC(C2=CC=[N+]3C(C4=CC=CC=C4O[B-]3(F)F)=C2)=CC=C1N5C6=C(C=C(C7=CC=CC=C7)C=C6)C8=C5C=CC(C9=CC=CC=C9)=C8	CC1=CC=CC=C1	69
F[B-]1(OC2=CC=CC=C2C3=CC(C4=C(C=C(C=C4C)N5C6=C(C7=C5C=CC=C7)C=CC=C6)C)=CC=[N+]31)F	CC1=CC=CC=C1	70
CC1=CC2=C(C(C)=C1)N(C1=CC3=C(C=C1)S(=O)(=O)C1=C(C=C(N4C5=C(C=C(C)C=C5C)C5=C4C(C)=CC(C)=C5)C=C1)C3(C)C)C1=C2C=C(C)C=C1C	CC1=CC=CC=C1	71
C1=CC=C(C2=NC(C3=CC=CC=C3)=NC(C3=CC=C(N4C5=CC=CC=C5C5=C6C(=CC=C54)C4=CC=CC=C4C6(C4=CC=CC=C4)C4=CC=CC=C4)C=C3)=N2)C=C1	CC1=CC=CC=C1	73
CC(C)(C1=CC2=C(N3C4=C(C(C5=C(N6C7=C(C8=C6C=CC=C8)C=CC=C7)C=CC=C53)=O)C=C(C=C24)C(C)(C)C)C=C1)C	CC1=CC=CC=C1	80
CC1=CC2=C3B(C4=C(N2C5=CC=C(C=C5)C(C)(C)C)C=CC(C(C)(C)C)=C4)C6=C(N(C3=C1)C7=CC=C(C=C7)C(C)(C)C)C=CC(C(C)(C)C)=C6	CC1=CC2=C(C=C1)C(C1=CC3=C(C=CC=C3)C=C1)=C1C=CC=CC1=C2C1=CC2=C(C=CC=C2)C=C1	27
CC1=CC(C)=C(C=C1)N(C2=C3C=CC4=C5C(C=CC(C=C2)=C35)=C(C=C4)N(C6=C(C=CC(C(C)(C)C)=C6)C)C7=C(C=C(C=C7)C)C)C8=C(C=CC(C(C)(C)C)=C8)C	CC1=CC2=C(C=C1)C(C1=CC3=C(C=CC=C3)C=C1)=C1C=CC=CC1=C2C1=CC2=C(C=CC=C2)C=C1	51
CC1C2=CC=CC3=C2B2C4=C(C=CC=C4C(C)C4=C2C1=CC(N1C2=CC=CC=C2C2(C5=C(C=CC=C5)C5=C2C=CC=C5)C2=C1C=CC=C2)=C4)C3	CC1C2=CC=CC3=C2B2C4=C(C=CC=C4C(C)C4=C2C1=CC(N1C2=CC=CC=C2C2(C5=C(C=CC=C5)C5=C2C=CC=C5)C2=C1C=CC=C2)=C4)C3	53
C1(C2=NC(C3=CC=CC=C3)=NC(C4=CC=CC=C4)=N2)=CC(C5=CC=CC=C5)=C(N6C7=CC=C(N8C9=C(C%10=C8C=CC=C%10)C=CC=C9)C=C7C%11=C6C=CC=C%11)C=C1	N#CC1=C(C(C2=CC3=C(OC4=C3C=C(C)C=C4)C=C2)=CC=C1)N5C6=C(C7=C5C=CC=C7)C=CC=C6	88
C1(C2=NC(C3=CC=CC=C3)=NC(C4=CC=CC=C4)=N2)=CC(C5=CC=CC=C5)=C(N6C7=CC=C(N8C9=C(C%10=C8C=CC=C%10)C=CC=C9)C=C7C%11=C6C=CC=C%11)C=C1	N#CC1=CC=CC(C2=CC(N3C4=C(C5=C3C=CC(C)=C5)C=C(C)C=C4)=CC=C2)=C1N6C7=C(C8=C6C=CC=C8)C=CC=C7	87
CC1=CC(C)=CC(C)=C1C2=CC3=C(N4C5=C(C6=C4C3=CC(C7=C(C=C(C=C7C)C)C)=C6)C=C8C(C9=C%10C(C%11=C(N8%10)C=CC(C%12=C(C=C(C=C%12C)C)C)=C%11)=CC(C%13=C(C=C(C=C%13C)C)C)=C9)=C5)C=C2	CC(=C)C(=O)OC	20
CC1=CC(C)=C(C2=CC3=C(C=C2)N2C4=C(C=C(C5=C(C)C=C(C)C=C5C)C=C4)C4=C2C3=CC(C2=C(C)C=C(C)C=C2C)=C4)C(C)=C1	CC(=C)C(=O)OC	28
C1=CC2=C(C=C1)N1C3=C(C=CC=C3)C3=C1C2=CC=C3	CC(=C)C(=O)OC	29
The testing set
C1=CC2=C(C=C1)B1C3=C(C=CC=C3)OC3=C1C(=CC(N1C4=C(C=CC=C4)C4(C5=C1C=CC=C5)C1=C(C=CC=C1)N(C1=CC5=C6B(C7=C(C=CC=C7)OC6=C1)C1=C(C=CC=C1)O5)C1=C4C=CC=C1)=C3)O2	CC1=CC=CC=C1	52
N(C1=CC=CC=C1)(C2=CC3=C4B(C5=CC6=C(C=C5S3)OC7=C8B6C9=C(C=CC=C9)N(C8=CC(N(C%10=CC=CC=C%10)C%11=CC=CC=C%11)=C7)C%12=CC=CC=C%12)C%13=C(C=CC=C%13)N(C4=C2)C%14=CC=CC=C%14)C%15=CC=CC=C%15	C1=CC=C2C(=C1)C3=CC=CC=C3N2C4=CC=CC(=C4)C5=CC(=CC=C5)N6C7=CC=CC=C7C8=CC=CC=C86	24
CC(C)(C)C1=CC=C(N2C3=CC(N(C4=CC=CC=C4)C4=CC=CC=C4)=CC4=C3B(C3=CC(C(C)(C)C)=CC=C3N4C3=CC=C(C(C)(C)C)C=C3)C3=C2C=CC(C(C)(C)C)=C3)C=C1	CC1=CC=CC=C1	26
CC(C)(C)C1=CC=C(N(C2=CC=C(C(C)(C)C)C=C2)C2=CC3=C4B(C5=CC(C(C)(C)C)=CC=C5N3C3=CC=C(C(C)(C)C)C=C3)C3=C(C=CC(C(C)(C)C)=C3)N(C3=CC=C(C(C)(C)C)C=C3)C4=C2)C=C1	CC1=CC=CC=C1	23
CC1(C)C2=CC=CC=C2C2=CC3=C(C=C21)N(C1=CC=C(C2=NC(C4=CC=CC=C4)=NC(C4=CC=CC=C4)=N2)C=C1)C1=CC=CC=C13	CC1=CC=CC=C1	79
CC(C)C1=CC(N2C3=CC=CC=C3C3(C4=C(C=CC=C4)C4=C3C=CC=C4)C3=C2C=CC=C3)=CC(C(C)C)=C1B1C2=C(C=CC=C2)C2(C3=C1C=CC=C3)C1=C(C=CC=C1)C1=C2C=CC=C1	CC1=CC=CC=C1	51
N(C1=CC=CC=C1)(C2=CC3=C4B(C5=CC6=C(C=C5S3)SC7=C8B6C9=C(C=CC=C9)N(C8=CC(N(C%10=CC=CC=C%10)C%11=CC=CC=C%11)=C7)C%12=CC=CC=C%12)C%13=C(C=CC=C%13)N(C4=C2)C%14=CC=CC=C%14)C%15=CC=CC=C%15	CC1=CC=CC=C1	20
F[B-]1(OC2=CC=CC=C2C3=CC(C4=C(C=C(C=C4C)N5C6=C(C7=C5C=CC(C8=CC=CC=C8)=C7)C=C(C=C6)C9=CC=CC=C9)C)=CC=[N+]31)F	C1=CC=C(C=C1)P(=O)(C2=CC=CC=C2)C3=CC=CC=C3OC4=CC=CC=C4P(=O)(C5=CC=CC=C5)C6=CC=CC=C6	91
CC(C)(C1=CC2=C(N3C4=C(C(C5=CC(N6C7=C(C8=C6C=CC=C8)C=CC=C7)=CC=C53)=O)C=C(C=C24)C(C)(C)C)C=C1)C	CC1=CC=CC=C1	41
C1(N(C2=CC3=C4B(C5=CC=C(C6=C5N(C7=C6C=CC=C7)C4=C2)N(C8=CC=CC=C8)C9=CC=CC=C9)C%10=CC=CC=C%10N3C%11=CC=CC=C%11)C%12=CC=CC=C%12)=CC=CC=C1	CC1=CC=CC=C1	20
CC(C)(C1=CC=C2OC3=C4B(C5=C(OC4=CC(C3)C6=CC=C(C=C6N7C8=C(C9=C7C=CC=C9)C(OC%10=C%11C=CC=C%10)=C%11C=C8)N%12C%13=C(C%14=C%12C=CC=C%14)C(O%15)=C(C%16=C%15C=CC=C%16)C=C%13)C=CC(C(C)(C)C)=C5)C2=C1)C	CC1=CC=CC=C1	25
N(C1=CC=CC=C1)(C2=CC=CC=C2)C3=CC4=C5B(C6=C(N(C7=CC=CC=C7)C5=C3)C=CC=C6)C8=CC9=C(OC%10=C%11B9C%12=C(N(C%13=CC=CC=C%13)C%11=CC(N(C%14=CC=CC=C%14)C%15=CC=CC=C%15)=C%10)C=CC=C%12)C=C8O4	CC1=CC=CC=C1	15
C1=CC=C(C2=NC(C3=CC=CC=C3)=NC(C3=CC=C(N4C5=CC=CC=C5C5=CC6=C(C=C54)C(C4=CC=CC=C4)(C4=CC=CC=C4)C4=CC=CC=C46)C=C3)=N2)C=C1	CC1=CC=CC=C1	69
C1=CC=C(C2=NC(C3=CC=CC=C3)=NC(C3=CC=C(N4C5=CC=CC=C5C5=CC6=C(C=C54)C4(C5=CC=CC=C5C5=CC=CC=C54)C4=CC=CC=C46)C=C3)=N2)C=C1	CC1=CC=CC=C1	57
CC1(C)C2=C(C=CC=C2)N(C2=CC3=C(C=C2)C2=C(C=C(N4C5=C(C=CC=C5)C(C)(C)C5=C4C=CC=C5)C=C2)C32C3=CC=CC=C3S(=O)(=O)C3=C2C=CC=C3)C2=C1C=CC=C2	CC1=CC=CC=C1	62
CC(C)(C)C1=CC=C(N(C2=CC=C(C(C)(C)C)C=C2)C2=CC3=C4B(C5=CC(C(C)(C)C)=CC=C5N3C3=CC=C(C(C)(C)C)C=C3)C3=C(C=CC(C(C)(C)C)=C3)N(C3=CC=C(C(C)(C)C)C=C3)C4=C2)C=C1	C1CCCCC1	18
C1=CC=C(N(C2=CC=CC=C2)C2=CC3=C4B(C5=CC=CC=C5N3C3=CC=CC=C3)C3=C(C=CC=C3)N(C3=CC=CC=C3)C4=C2)C=C1	CC1=CC=CC=C1	23
CC1C2=CC=CC3=C2B2C4=C(C=CC=C4C(C)C4=C2C1=CC(N1C2=CC=CC=C2C2(C5=C(C=CC=C5)C5=C2C=CC=C5)C2=C1C=CC=C2)=C4)C3	C1=CC=C2C(=C1)C3=CC=CC=C3N2C4=CC(=CC=C4)N5C6=CC=CC=C6C7=CC=CC=C75	56

## Sheet: References
DOI of References
144 literature used for collecting all the OLED blue emitters
https://doi.org/10.1002/ange.202100423
10.1002/anie.201508270
10.1039/C5CC00307E
10.1021/acsami.9b00931
10.1038/s41566-019-0415-5
10.1039/C9TC05950D
10.1039/C9TC04115J
10.1002/adfm.202105805
https://doi.org/10.1021/acsami.1c10653
https://doi.org/10.1021/acsami.1c11812
10.1039/d1tc01119g
https://doi.org/10.1021/acsami.5b08291
DOI: 10.1039/c5mh00258c
DOI: 10.1002/adfm.201502995
DOI: 10.1038/NMAT4154
DOI: 10.1039/c5cc07999c
https://doi.org/10.1021/acs.jpcc.5b09114
https://doi.org/10.1038/nature11687
https://doi.org/10.1002/anie.201412107
https://doi.org/10.1246/cl.130907
https://doi.org/10.1021/acsami.5b05648
https://doi.org/10.1002/adfm.201505106
https://doi.org/10.1103/PhysRevLett.110.247401
https://doi.org/10.1002/adma.201500267
https://doi.org/10.1016/j.dyepig.2015.02.014
https://doi.org/10.1021/acs.chemmater.5b02515
https://doi.org/10.1016/j.dyepig.2016.01.021
https://doi.org/10.1039/C5TC04057D
https://doi.org/10.1088/1468-6996/15/3/034202
https://doi.org/10.1021/ja306538w
https://doi.org/10.1039/C3TC31936A
https://doi.org/10.1016/j.dyepig.2014.06.008
https://doi.org/10.1038/nphoton.2014.12
https://doi.org/10.1007/s00289-016-1671-x
https://doi.org/10.1039/C5CC05435D
https://doi.org/10.1002/adma.201300753
https://doi.org/10.1002/anie.201402992
https://doi.org/10.1039/C4DT03608E
https://doi.org/10.1021/acsami.5b12559
https://doi.org/10.1002/anie.201506335
https://doi.org/10.1002/anie.201508270
https://doi.org/10.1016/j.orgel.2016.04.030
https://doi.org/10.1039/C5CC04126K
https://doi.org/10.1039/C3TC30699B
https://doi.org/10.1002/adma.201506391
https://doi.org/10.1039/C6TC00418K
10.1039/c9tc07102d
https://doi.org/10.1002/adom.201801282
https://doi.org/10.1021/acsami.8b20699
10.1039/D1TC04939A
https://doi.org/10.1002/adom.202101282
https://doi.org/10.1002/adom.202100406
https://doi.org/10.1021/acs.jpclett.1c02642
https://doi.org/10.1002/advs.202102141
https://doi.org/10.1021/acsami.1c17449
https://doi.org/10.1016/j.cej.2021.133598
https://doi.org/10.1016/j.cej.2021.133078
10.1039/D1NJ02492B
https://doi.org/10.21203/rs.3.rs-537019/v1
https://doi.org/10.1002/adma.202004083
https://doi.org/10.1002/advs.201902508
https://doi.org/10.1002/adom.201902175
https://doi.org/10.1002/adom.201901150
https://doi.org/10.1016/j.dyepig.2020.108324
10.1016/j.cej.2021.133221
10.1002/adfm.202102588
https://doi.org/10.1016/j.cej.2021.128574
https://doi.org/10.1016/j.dyepig.2019.108097
https://doi.org/10.1016/j.orgel.2019.105610
https://doi.org/10.1021/acsami.1c18704
https://doi.org/10.31635/ccschem.020.202000392
https://doi.org/10.1002/anie.202108283
DOI: 10.1039/d1tc03779j
https://doi.org/10.1016/j.dyepig.2021.109579
https://doi.org/10.1002/adom.202100784
https://doi.org/10.1016/j.dyepig.2021.109860
https://doi.org/10.1016/j.orgel.2021.106411
https://doi.org/10.1002/adfm.202009488
https://doi.org/10.1016/j.mseb.2021.115441
https://doi.org/10.1016/j.dyepig.2021.109892
DOI: 10.1039/D0TC05395C
DOI: 10.1039/d1cc04405b
https://doi.org/10.1002/adfm.202102588
https://doi.org/10.1021/acsami.1c00278
https://doi.org/10.1016/j.dyepig.2021.109581
DOI: 10.1039/c9tc05550a
https://doi.org/10.1021/acsami.0c07840
https://doi.org/10.1016/j.mtchem.2021.100645
https://doi.org/10.1002/chem.202000926
https://doi.org/10.1016/j.dyepig.2021.109224
https://doi.org/10.1002/adom.202000102
https://doi.org/10.1016/j.orgel.2021.106254
https://doi.org/10.1016/j.orgel.2019.105604
https://doi.org/10.1016/j.orgel.2021.106275
https://doi.org/10.1016/j.jare.2021.01.014
DOI: 10.1039/d0nj00905a
https://doi.org/10.1016/j.dyepig.2020.108367
https://doi.org/10.1021/acsami.1c11399
DOI: 10.1039/d0tc00039f
https://doi.org/10.1002/adfm.201706023
DOI: 10.1039/c8tc00546j
https://doi.org/10.1002/anie.201609459
https://doi.org/10.1039/C9TC02175B
https://doi.org/10.1039/C7TC05709A
https://doi.org/10.1016/j.dyepig.2018.03.004
https://doi.org/10.1021/acs.chemmater.7b02964
https://doi.org/10.1021/acsomega.8b03296
DOI: 10.1039/c7nj04482h
DOI: 10.1039/c9tc01498e
https://doi.org/10.1016/j.nanoen.2019.02.067
https://doi.org/10.1021/acs.jpcc.8b08716
https://doi.org/10.1021/acs.jpcc.9b08479
https://doi.org/10.1021/acsami.7b09351
https://doi.org/10.1016/j.cej.2021.129185
https://doi.org/10.1016/j.jlumin.2018.10.017
DOI: 10.1039/d0tc01811b
DOI: 10.1039/D0TC04162A
DOI: 10.1039/d1tc05497j
DOI: 10.1039/D1TC04712D
https://doi.org/10.1016/j.cej.2022.135080
https://doi.org/10.1016/j.cej.2022.134868
https://doi.org/10.1016/j.cej.2022.134728
https://doi.org/10.1016/j.jlumin.2021.118473
https://doi.org/10.1021/acs.jpcb.1c05749
https://doi.org/10.1016/j.cej.2022.135234
https://doi.org/10.1016/j.cej.2021.131877
DOI: 10.1039/d1tc05730h
DOI: 10.1039/d1tc05691c
https://doi.org/10.1002/adma.202107951
DOI: 10.1039/d1tc04918f
https://doi.org/10.1016/j.cej.2021.130988
DOI: 10.1039/d1tc04939a
https://doi.org/10.1016/j.cej.2021.133221
DOI: 10.1039/d1cp05942d
https://doi.org/10.1016/j.orgel.2022.106445
https://doi.org/10.1016/j.dyepig.2021.109868
https://doi.org/10.1002/ange.202116810
DOI: 10.1039/D1TC05696D
DOI: 10.1039/D1NJ04934H
https://doi.org/10.1016/j.dyepig.2022.110085
DOI: 10.1039/D1TC05061C
https://doi.org/10.1016/j.dyepig.2021.109956
https://doi.org/10.1016/j.jlumin.2021.118502
https://doi.org/10.1002/adma.202100161
